# Supplementary material for: A dual pathways transfer model to account for changes in the radioactive caesium level in demersal and pelagic fish after the Fukushima Daï-ichi nuclear power plant accident
Source: PLoS One. 2017 Mar 1;12(3):e0172442. doi: 10.1371/journal.pone.0172442 (PMC5383001; doi:10.1371/journal.pone.0172442)
Supplement: S1 Data — (XLSX) [file pone.0172442.s001.xlsx]

## Sheet: Seawater_2_30km
SELECT	Dist. FDNPP, Km	>= 2 Km AND <= 30 Km		Seawater, Bq/L
Long E, °dec	lat N, °dec	Dist. FDNPP, Km	Date Smpl	Cs-137	< DL
141.026	37.3222	11.455	2011-03-21 23:15:00	53
141.014	37.2417	20.4835	2011-03-21 23:45:00	32.9
141.026	37.3222	11.455	2011-03-22 00:38:00	77.6
141.027	37.3387	9.62451	2011-03-22 12:38:00	77.6
141.026	37.3222	11.455	2011-03-22 14:28:00	39
141.014	37.2417	20.4835	2011-03-22 15:06:00	43.6
141.014	37.2417	20.4835	2011-03-23 13:51:00	55
141.014	37.2417	20.4835	2011-03-23 14:25:00	43
141.014	37.2417	20.4835	2011-03-24 08:45:00	38
141.026	37.3222	11.455	2011-03-24 09:30:00	94
141.014	37.2417	20.4835	2011-03-25 09:10:00	22
141.026	37.3222	11.455	2011-03-25 10:00:00	34
141.026	37.3222	11.455	2011-03-26 15:15:00	27
141.014	37.2417	20.4835	2011-03-26 15:50:00	14
141.014	37.2417	20.4835	2011-03-27 08:45:00	24
141.026	37.3222	11.455	2011-03-27 14:30:00	570
141.014	37.2417	20.4835	2011-03-28 08:45:00	380
141.026	37.3222	11.455	2011-03-28 09:35:00	620
141.014	37.2417	20.4835	2011-03-29 09:20:00	230
141.026	37.3222	11.455	2011-03-29 10:15:00	320
141.014	37.2417	20.4835	2011-03-30 09:05:00	190
141.026	37.3222	11.455	2011-03-30 10:00:00	340
141.014	37.2417	20.4835	2011-03-31 09:15:00	180
141.026	37.3222	11.455	2011-03-31 10:00:00	360
141.014	37.2417	20.4835	2011-04-01 09:00:00	190
141.026	37.3222	11.455	2011-04-01 09:50:00	290
141.014	37.2417	20.4835	2011-04-02 09:00:00	44
141.026	37.3222	11.455	2011-04-02 09:55:00	180
141.2	37.3333	17.8123	2011-04-02 13:35:00	25
141.2	37.4167	14.6356	2011-04-02 14:03:00	26
141.014	37.2417	20.4835	2011-04-03 08:50:00	28
141.026	37.3222	11.455	2011-04-03 09:35:00	92
141.2	37.3333	17.8123	2011-04-03 12:20:00	18
141.2	37.4167	14.6356	2011-04-03 12:39:00	39
141.014	37.2417	20.4835	2011-04-04 08:40:00	25
141.026	37.3222	11.455	2011-04-04 09:50:00	240
141.2	37.3333	17.8123	2011-04-04 12:10:00	19
141.2	37.4167	14.6356	2011-04-04 12:29:00	64
141.014	37.2417	20.4835	2011-04-05 08:50:00	1400
141.026	37.3222	11.455	2011-04-05 09:45:00	1400
141.2	37.3333	17.8123	2011-04-05 13:15:00	19
141.2	37.4167	14.6356	2011-04-05 13:33:00	77
141.2	37.5	16.8324	2011-04-05 13:48:00	71
141.2	37.5833	22.9052	2011-04-05 14:03:00	18
141.2	37.4167	14.6356	2011-04-05 15:45:00	45
141.2	37.3333	17.8123	2011-04-05 16:14:00	22
141.2	37.2333	25.851	2011-04-05 16:53:00	320
141.014	37.2417	20.4835	2011-04-06 08:35:00	1100
141.026	37.3222	11.455	2011-04-06 09:05:00	1100
141.2	37.5833	22.9052	2011-04-06 10:41:00	46
141.2	37.5	16.8324	2011-04-06 11:10:00	200
141.2	37.4167	14.6356	2011-04-06 11:38:00	130
141.2	37.5	16.8324	2011-04-06 11:54:00	190
141.2	37.3333	17.8123	2011-04-06 12:12:00	37
141.2	37.4167	14.6356	2011-04-06 12:29:00	100
141.2	37.3333	17.8123	2011-04-07 09:08:00	13
141.014	37.2417	20.4835	2011-04-07 09:10:00	990
141.2	37.4167	14.6356	2011-04-07 09:36:00	42
141.026	37.3222	11.455	2011-04-07 09:55:00	1000
141.2	37.5	16.8324	2011-04-07 10:02:00	81
141.2	37.3333	17.8123	2011-04-07 10:24:00	19
141.2	37.5833	22.9052	2011-04-07 10:30:00	210
141.014	37.2417	20.4835	2011-04-08 08:10:00	670
141.026	37.3222	11.455	2011-04-08 09:05:00	880
141.014	37.2417	20.4835	2011-04-09 08:00:00	610
141.026	37.3222	11.455	2011-04-09 08:30:00	710
141.014	37.2417	20.4835	2011-04-10 07:55:00	600
141.026	37.3222	11.455	2011-04-10 08:25:00	960
141.014	37.2417	20.4835	2011-04-12 07:55:00	970
141.026	37.3222	11.455	2011-04-12 08:30:00	1000
141.014	37.2417	20.4835	2011-04-13 07:50:00	1100
141.026	37.3222	11.455	2011-04-13 08:35:00	1000
141.2	37.2333	25.851	2011-04-13 09:25:00	110
141.014	37.2417	20.4835	2011-04-14 07:55:00	870
141.2	37.2333	25.851	2011-04-14 07:57:00	76
141.2	37.3333	17.8123	2011-04-14 08:22:00	91
141.026	37.3222	11.455	2011-04-14 08:25:00	850
141.2	37.4167	14.6356	2011-04-14 08:48:00	190
141.2	37.5	16.8324	2011-04-14 09:14:00	280
141.2	37.5833	22.9052	2011-04-14 09:42:00	69
141.2	37.2333	25.851	2011-04-14 09:51:00	39
141.2	37.3333	17.8123	2011-04-14 10:19:00	84
141.2	37.4167	14.6356	2011-04-14 10:43:00	140
141.2	37.2333	25.851	2011-04-15 08:05:00	180
141.014	37.2417	20.4835	2011-04-15 08:10:00	590
141.2	37.3333	17.8123	2011-04-15 08:30:00	82
141.2	37.2333	25.851	2011-04-15 08:31:00	170
141.026	37.3222	11.455	2011-04-15 08:40:00	870
141.2	37.3333	17.8123	2011-04-15 08:58:00	210
141.2	37.4167	14.6356	2011-04-15 09:00:00	120
141.2	37.4167	14.6356	2011-04-15 09:28:00	130
141.2	37.5	16.8324	2011-04-15 09:30:00	210
141.2	37.5833	22.9052	2011-04-15 09:55:00	66
141.2	37.5	16.8324	2011-04-15 09:58:00	230
141.2	37.5833	22.9052	2011-04-15 10:30:00	37
141.014	37.2417	20.4835	2011-04-16 08:05:00	400
141.026	37.3222	11.455	2011-04-16 08:40:00	690
141.047	37.2417	20.4295	2011-04-17 08:43:00	390
141.122	37.5306	14.0791	2011-04-17 09:05:00	300
141.047	37.2417	20.4295	2011-04-18 07:25:00	380
141.106	37.2833	16.9577	2011-04-18 07:45:00	320
141.2	37.2333	25.851	2011-04-18 07:48:00	110
141.014	37.2417	20.4835	2011-04-18 08:00:00	340
141.2	37.3333	17.8123	2011-04-18 08:18:00	290
141.026	37.3222	11.455	2011-04-18 08:30:00	470
141.2	37.4167	14.6356	2011-04-18 08:53:00	150
141.122	37.5306	14.0791	2011-04-18 09:05:00	17
141.2	37.5	16.8324	2011-04-18 09:31:00	130
141.2	37.5833	22.9052	2011-04-18 10:05:00	62
141.014	37.2417	20.4835	2011-04-19 08:10:00	270
141.026	37.3222	11.455	2011-04-19 09:00:00	480
141.014	37.2417	20.4835	2011-04-20 08:00:00	240
141.026	37.3222	11.455	2011-04-20 08:35:00	340
141.014	37.2417	20.4835	2011-04-21 08:00:00	200
141.026	37.3222	11.455	2011-04-21 08:30:00	180
141.047	37.2417	20.4295	2011-04-22 07:45:00	120
141.106	37.2833	16.9577	2011-04-22 08:00:00	50
141.2	37.3333	17.8123	2011-04-22 09:10:00	27
141.122	37.5306	14.0791	2011-04-22 09:40:00	24
141.2	37.4167	14.6356	2011-04-22 09:45:00	24
141.2	37.5	16.8324	2011-04-22 10:22:00	11
141.014	37.2417	20.4835	2011-04-22 15:00:00	110
141.026	37.3222	11.455	2011-04-22 16:00:00	180
141.014	37.2417	20.4835	2011-04-23 08:05:00	120
141.026	37.3222	11.455	2011-04-23 08:40:00	100
141.014	37.2417	20.4835	2011-04-24 08:15:00	67
141.026	37.3222	11.455	2011-04-24 09:00:00	76
141.047	37.2417	20.4295	2011-04-25 07:27:00	81
141.106	37.2833	16.9577	2011-04-25 07:45:00	180
141.2	37.2333	25.851	2011-04-25 07:50:00	76
141.014	37.2417	20.4835	2011-04-25 08:10:00	78
141.2	37.3333	17.8123	2011-04-25 08:20:00	70
141.026	37.3222	11.455	2011-04-25 08:35:00	76
141.2	37.4167	14.6356	2011-04-25 08:50:00	48
141.122	37.5306	14.0791	2011-04-25 08:58:00	17
141.062	37.5528	14.4507	2011-04-25 09:19:00	16
141.2	37.5	16.8324	2011-04-25 09:20:00	18
141.2	37.5833	22.9052	2011-04-25 09:45:00	5.3
141.047	37.2417	20.4295	2011-04-26 07:39:00	67
141.2	37.2333	25.851	2011-04-26 07:40:00	27
141.106	37.2833	16.9577	2011-04-26 07:59:00	200
141.2	37.3333	17.8123	2011-04-26 08:05:00	88
141.014	37.2417	20.4835	2011-04-26 08:05:00	97
141.026	37.3222	11.455	2011-04-26 08:40:00	73
141.014	37.2417	20.4835	2011-04-27 08:10:00	73
141.026	37.3222	11.455	2011-04-27 08:40:00	48
141.014	37.2417	20.4835	2011-04-28 08:10:00	41
141.026	37.3222	11.455	2011-04-28 08:40:00	40
141.047	37.2417	20.4295	2011-04-29 08:02:00	45
141.014	37.2417	20.4835	2011-04-29 08:10:00	53
141.2	37.2333	25.851	2011-04-29 08:20:00	45
141.026	37.3222	11.455	2011-04-29 08:30:00	53
141.106	37.2833	16.9577	2011-04-29 08:35:00	67
141.2	37.3333	17.8123	2011-04-29 08:40:00	50
141.2	37.4167	14.6356	2011-04-29 09:00:00	72
141.2	37.5	16.8324	2011-04-29 09:25:00	50
141.2	37.5833	22.9052	2011-04-29 09:45:00	66
141.122	37.5306	14.0791	2011-04-29 10:06:00	35
141.062	37.5528	14.4507	2011-04-29 10:39:00	19
141.061	37.6	19.6377	2011-04-29 10:59:00	13
141.014	37.2417	20.4835	2011-04-30 08:05:00	76
141.2	37.2333	25.851	2011-04-30 08:15:00	21
141.026	37.3222	11.455	2011-04-30 08:30:00	220
141.047	37.2417	20.4295	2011-04-30 08:31:00	40
141.2	37.3333	17.8123	2011-04-30 08:40:00	64
141.106	37.2833	16.9577	2011-04-30 08:56:00	46
141.014	37.2417	20.4835	2011-05-01 08:10:00	26
141.026	37.3222	11.455	2011-05-01 08:40:00	39
141.014	37.2417	20.4835	2011-05-02 08:10:00	49
141.026	37.3222	11.455	2011-05-02 08:35:00	37
141.2	37.2333	25.851	2011-05-03 07:20:00	10
141.2	37.3333	17.8123	2011-05-03 07:45:00	18
141.2	37.4167	14.6356	2011-05-03 08:05:00	23
141.014	37.2417	20.4835	2011-05-03 08:10:00	37
141.047	37.2417	20.4295	2011-05-03 08:13:00	16
141.2	37.5	16.8324	2011-05-03 08:30:00	31
141.026	37.3222	11.455	2011-05-03 08:35:00	36
141.106	37.2833	16.9577	2011-05-03 08:40:00	16
141.061	37.6	19.6377	2011-05-03 08:50:00	13
141.2	37.5833	22.9052	2011-05-03 08:50:00	25
141.062	37.5528	14.4507	2011-05-03 09:35:00	19
141.122	37.5306	14.0791	2011-05-03 10:00:00	21
141.2	37.5833	22.9052	2011-05-04	15
141.2	37.2333	25.851	2011-05-04 07:40:00	15
141.047	37.2417	20.4295	2011-05-04 08:07:00	18
141.014	37.2417	20.4835	2011-05-04 08:10:00	33
141.106	37.2833	16.9577	2011-05-04 08:33:00	15
141.026	37.3222	11.455	2011-05-04 08:40:00	26
141.2	37.4167	14.6356	2011-05-04 08:45:00	23
141.2	37.5	16.8324	2011-05-04 09:05:00	20
141.061	37.6	19.6377	2011-05-04 09:55:00	9.3
141.122	37.5306	14.0791	2011-05-04 09:55:00	22
141.014	37.2417	20.4835	2011-05-05 08:05:00	38
141.047	37.2417	20.4295	2011-05-05 08:11:00	20
141.2	37.2333	25.851	2011-05-05 08:15:00	17
141.026	37.3222	11.455	2011-05-05 08:30:00	45
141.106	37.2833	16.9577	2011-05-05 08:33:00	26
141.2	37.3333	17.8123	2011-05-05 08:40:00	5.6
141.2	37.5833	22.9052	2011-05-05 09:05:00	11
141.2	37.5	16.8324	2011-05-05 09:30:00	9.9
141.122	37.5306	14.0791	2011-05-05 10:05:00	24
141.061	37.6	19.6377	2011-05-05 10:32:00	16
141.2	37.2333	25.851	2011-05-06 07:23:00	16
141.047	37.2417	20.4295	2011-05-06 07:50:00	21
141.106	37.2833	16.9577	2011-05-06 08:15:00	21
141.014	37.2417	20.4835	2011-05-06 08:15:00	37
141.026	37.3222	11.455	2011-05-06 08:40:00	24
141.061	37.6	19.6377	2011-05-06 09:30:00	19
141.062	37.5528	14.4507	2011-05-06 09:43:00	22
141.122	37.5306	14.0791	2011-05-06 10:03:00	26
141.2	37.2333	25.851	2011-05-07 07:50:00	16
141.047	37.2417	20.4295	2011-05-07 08:00:00	30
141.014	37.2417	20.4835	2011-05-07 08:10:00	36
141.2	37.3333	17.8123	2011-05-07 08:20:00	16
141.106	37.2833	16.9577	2011-05-07 08:20:00	19
141.026	37.3222	11.455	2011-05-07 08:45:00	34
141.2	37.5	16.8324	2011-05-07 09:15:00	6.7
141.2	37.5833	22.9052	2011-05-07 09:40:00	6.4
141.122	37.5306	14.0791	2011-05-07 10:00:00	26
141.061	37.6	19.6377	2011-05-07 10:15:00	18
141.062	37.5528	14.4507	2011-05-07 10:25:00	27
141.014	37.2417	20.4835	2011-05-08 07:55:00	36
141.026	37.3222	11.455	2011-05-08 08:25:00	44
141.014	37.2417	20.4835	2011-05-09 08:15:00	43
141.026	37.3222	11.455	2011-05-09 08:50:00	40
141.2	37.2333	25.851	2011-05-09 09:30:00	13
141.2	37.5833	22.9052	2011-05-09 10:20:00	18
141.047	37.2417	20.4295	2011-05-09 10:50:00	14
141.062	37.5528	14.4507	2011-05-09 11:10:00	23
141.014	37.2417	20.4835	2011-05-10 08:20:00	27
141.026	37.3222	11.455	2011-05-10 08:50:00	28
141.106	37.2833	16.9577	2011-05-10 09:50:00	13
141.061	37.6	19.6377	2011-05-10 10:15:00	19
141.062	37.5528	14.4507	2011-05-10 10:35:00	18
141.047	37.2417	20.4295	2011-05-10 10:50:00	17
141.122	37.5306	14.0791	2011-05-10 10:50:00	20
141.014	37.2417	20.4835	2011-05-11 08:00:00	24
141.026	37.3222	11.455	2011-05-11 08:55:00	31
141.014	37.2417	20.4835	2011-05-12 07:50:00	26
141.026	37.3222	11.455	2011-05-12 08:45:00	27
141.014	37.2417	20.4835	2011-05-13 07:50:00	25
141.026	37.3222	11.455	2011-05-13 08:30:00	29
141.014	37.2417	20.4835	2011-05-14 07:55:00	26
141.026	37.3222	11.455	2011-05-14 08:40:00	32
141.047	37.2417	20.4295	2011-05-15 07:20:00	17
141.047	37.2417	20.4295	2011-05-15 07:30:00	12
141.014	37.2417	20.4835	2011-05-15 07:55:00	38
141.026	37.3222	11.455	2011-05-15 08:30:00	22
141.2	37.4167	14.6356	2011-05-15 08:40:00	5.3
141.2	37.3333	17.8123	2011-05-15 09:10:00	13
141.2	37.5	16.8324	2011-05-15 10:10:00	7.9
141.106	37.2833	16.9577	2011-05-15 11:35:00	6
141.106	37.2833	16.9577	2011-05-15 11:35:00	7.7
141.014	37.2417	20.4835	2011-05-16 07:55:00	35
141.026	37.3222	11.455	2011-05-16 08:30:00	18
141.2	37.5833	22.9052	2011-05-16 09:40:00	9.7
141.106	37.2833	16.9577	2011-05-16 09:45:00	5
141.047	37.2417	20.4295	2011-05-16 10:15:00	11
141.014	37.2417	20.4835	2011-05-17 07:55:00	27
141.026	37.3222	11.455	2011-05-17 08:35:00	18
141.014	37.2417	20.4835	2011-05-18 07:55:00	21
141.026	37.3222	11.455	2011-05-18 09:15:00	25
141.106	37.2833	16.9577	2011-05-18 09:20:00	6.2
141.047	37.2417	20.4295	2011-05-18 09:45:00	9.1
141.061	37.6	19.6377	2011-05-18 10:25:00	22
141.062	37.5528	14.4507	2011-05-18 10:40:00	19
141.122	37.5306	14.0791	2011-05-18 11:00:00	19
141.014	37.2417	20.4835	2011-05-19 07:55:00	21
141.026	37.3222	11.455	2011-05-19 08:40:00	32
141.2	37.2333	25.851	2011-05-20 07:50:00	12
141.2	37.5	16.8324	2011-05-20 08:05:00	5.4
141.2	37.5833	22.9052	2011-05-20 08:25:00	7.5
141.062	37.5528	14.4507	2011-05-20 09:05:00	7.1
141.047	37.2417	20.4295	2011-05-20 10:05:00	13
141.106	37.2833	16.9577	2011-05-21 07:20:00	20
141.014	37.2417	20.4835	2011-05-21 07:50:00	20
141.026	37.3222	11.455	2011-05-21 08:30:00	14
141.122	37.5306	14.0791	2011-05-21 08:40:00	14
141.061	37.6	19.6377	2011-05-21 08:55:00	8.7
141.047	37.2417	20.4295	2011-05-21 08:55:00	11
141.062	37.5528	14.4507	2011-05-21 08:55:00	14
141.106	37.2833	16.9577	2011-05-22 08:05:00	5.4
141.026	37.3222	11.455	2011-05-22 08:35:00	15
141.106	37.2833	16.9577	2011-05-23 07:10:00	9.4
141.2	37.2333	25.851	2011-05-23 08:05:00	5.2
141.2	37.4167	14.6356	2011-05-23 08:15:00	8.4
141.026	37.3222	11.455	2011-05-23 08:45:00	20
141.047	37.2417	20.4295	2011-05-23 08:55:00	7.4
141.047	37.2417	20.4295	2011-05-24 07:10:00	17
141.106	37.2833	16.9577	2011-05-24 07:35:00	9.3
141.014	37.2417	20.4835	2011-05-24 08:05:00	20
141.2	37.4167	14.6356	2011-05-24 08:10:00	13
141.2	37.5	16.8324	2011-05-24 08:15:00	8.4
141.026	37.3222	11.455	2011-05-24 08:45:00	16
141.122	37.5306	14.0791	2011-05-24 08:50:00	21
141.062	37.5528	14.4507	2011-05-24 09:10:00	9.9
141.014	37.2417	20.4835	2011-05-25 08:20:00	33
141.014	37.2417	20.4835	2011-05-26 08:05:00	33
141.047	37.2417	20.4295	2011-05-27 07:25:00	18
141.014	37.2417	20.4835	2011-05-27 07:50:00	19
141.026	37.3222	11.455	2011-05-27 08:35:00	26
141.014	37.2417	20.4835	2011-05-28 07:50:00	28
141.026	37.3222	11.455	2011-05-28 08:30:00	16
141.026	37.3222	11.455	2011-05-29	21
141.014	37.2417	20.4835	2011-05-29 08:05:00	42
141.014	37.2417	20.4835	2011-05-30 07:55:00	32
141.014	37.2417	20.4835	2011-05-31 08:00:00	39
141.026	37.3222	11.455	2011-05-31 08:40:00	35
141.014	37.2417	20.4835	2011-06-01 07:50:00	57
141.026	37.3222	11.455	2011-06-01 09:30:00	38
141.047	37.2417	20.4295	2011-06-02 07:10:00	17
141.014	37.2417	20.4835	2011-06-02 08:05:00	63
141.026	37.3222	11.455	2011-06-02 09:05:00	26
141.2	37.2333	25.851	2011-06-02 10:10:00	8.2
141.2	37.2333	25.851	2011-06-02 10:10:00	11
141.014	37.2417	20.4835	2011-06-03 07:55:00	15
141.106	37.2833	16.9577	2011-06-03 08:05:00	8.2
141.026	37.3222	11.455	2011-06-03 09:10:00	16
141.014	37.2417	20.4835	2011-06-04 08:05:00	20
141.026	37.3222	11.455	2011-06-04 09:30:00	18
141.047	37.2417	20.4295	2011-06-05 07:20:00	9.1
141.047	37.2417	20.4295	2011-06-05 07:20:00	19
141.106	37.2833	16.9577	2011-06-05 07:45:00	10
141.106	37.2833	16.9577	2011-06-05 07:45:00	11
141.014	37.2417	20.4835	2011-06-05 07:45:00	13
141.2	37.5	16.8324	2011-06-05 08:20:00	11
141.2	37.5	16.8324	2011-06-05 08:20:00	14
141.2	37.5833	22.9052	2011-06-05 08:50:00	11
141.2	37.5833	22.9052	2011-06-05 08:50:00	14
141.026	37.3222	11.455	2011-06-05 09:30:00	10
141.122	37.5306	14.0791	2011-06-05 10:00:00	17
141.014	37.2417	20.4835	2011-06-07 07:50:00	7.2
141.026	37.3222	11.455	2011-06-08 08:30:00	5.8
141.026	37.3222	11.455	2011-06-11 09:20:00	5.3
141.014	37.2417	20.4835	2011-06-12 07:45:00	8.9
141.2	37.4167	14.6356	2011-06-12 08:40:00	15
141.026	37.3222	11.455	2011-06-14 06:55:00	5.9
141.014	37.2417	20.4835	2011-06-14 07:55:00	7.6
141.047	37.2417	20.4295	2011-06-15 06:50:00	7.4
141.014	37.2417	20.4835	2011-06-15 08:05:00	12
141.014	37.2417	20.4835	2011-06-16 07:55:00	10
141.014	37.2417	20.4835	2011-06-17 07:55:00	5.5
141.106	37.2833	16.9577	2011-06-17 08:45:00	4.6
141.026	37.3222	11.455	2011-06-20	4.8
141.014	37.2417	20.4835	2011-06-25 07:35:00	6.1
141.026	37.3222	11.455	2011-06-25 08:00:00	4.8
141.014	37.2417	20.4835	2011-06-26 07:55:00	4.7
141.026	37.3222	11.455	2011-06-26 08:15:00	7.4
141.014	37.2417	20.4835	2011-06-27 07:55:00	6.9
141.026	37.3222	11.455	2011-06-27 08:25:00	5.5
141.014	37.2417	20.4835	2011-06-28 08:10:00	4.9
141.026	37.3222	11.455	2011-06-28 08:35:00	6.7
141.014	37.2417	20.4835	2011-06-29 07:55:00	6.8
141.026	37.3222	11.455	2011-06-29 08:25:00	5
141.014	37.2417	20.4835	2011-07-01 07:45:00	5.8
141.014	37.2417	20.4835	2011-07-02 07:40:00	5.9
141.026	37.3222	11.455	2011-07-02 08:00:00	6.7
141.014	37.2417	20.4835	2011-07-03 07:45:00	5.2
141.026	37.3222	11.455	2011-07-03 08:10:00	7.4
141.014	37.2417	20.4835	2011-07-05 08:05:00	4.2
141.026	37.3222	11.455	2011-07-05 08:25:00	5.1
141.014	37.2417	20.4835	2011-07-07 07:50:00	4.3
141.014	37.2417	20.4835	2011-07-08 07:45:00	5.1
141.026	37.3222	11.455	2011-07-08 08:15:00	4.9
141.014	37.2417	20.4835	2011-07-09 07:45:00	5.1
141.014	37.2417	20.4835	2011-07-10 07:45:00	5.6
141.047	37.2417	20.4295	2011-07-11 07:00:00	3.7
141.026	37.3222	11.455	2011-07-11 08:25:00	5.3
141.026	37.3222	11.455	2011-07-12 08:10:00	5.6
141.026	37.3222	11.455	2011-07-15 08:20:00	4.3
141.014	37.2417	20.4835	2011-07-18 07:30:00	4.6
141.026	37.3222	11.455	2011-07-18 07:55:00	6
141.014	37.2417	20.4835	2011-07-19 07:50:00	7
141.026	37.3222	11.455	2011-07-19 08:20:00	5.9
141.026	37.3222	11.455	2011-07-20 08:25:00	6.1
141.014	37.2417	20.4835	2011-07-21 07:55:00	6.2
141.026	37.3222	11.455	2011-07-21 08:25:00	9.1
141.026	37.3222	11.455	2011-07-22 08:30:00	6.7
141.014	37.2417	20.4835	2011-07-23 07:50:00	4.4
141.026	37.3222	11.455	2011-07-23 08:15:00	5.6
141.014	37.2417	20.4835	2011-07-24 07:35:00	5.4
141.026	37.3222	11.455	2011-07-24 08:00:00	5.5
141.014	37.2417	20.4835	2011-07-25 07:40:00	9.4
141.026	37.3222	11.455	2011-07-25 08:15:00	5.7
141.014	37.2417	20.4835	2011-07-28 07:55:00	4.3
141.014	37.2417	20.4835	2011-07-29 08:05:00	5.3
141.373	37.4167	29.9466	2011-07-29 11:37:00	0.51	0.002
141.373	37.4167	29.9466	2011-07-29 11:37:00	<	9
141.373	37.415	29.9529	2011-07-29 11:37:00	<	9
141.026	37.3222	11.455	2011-07-30 08:20:00	5.7
141.106	37.2833	16.9577	2011-07-31 07:25:00	<	5
141.106	37.2833	16.9577	2011-07-31 07:25:00	<	5
141.014	37.2417	20.4835	2011-07-31 08:00:00	<	24
141.026	37.3222	11.455	2011-07-31 08:30:00	<	24
141.122	37.5306	14.0791	2011-07-31 08:45:00	<	5
141.122	37.5306	14.0791	2011-07-31 08:45:00	<	5
141.061	37.6	19.6377	2011-07-31 09:15:00	<	5
141.061	37.6	19.6377	2011-07-31 09:15:00	<	5
141.062	37.5528	14.4507	2011-07-31 09:30:00	<	5
141.062	37.5528	14.4507	2011-07-31 09:30:00	<	5
141.047	37.2417	20.4295	2011-07-31 11:05:00	<	5
141.047	37.2417	20.4295	2011-07-31 11:05:00	<	5
141.014	37.2417	20.4835	2011-08-01 07:55:00	5.8	24
141.026	37.3222	11.455	2011-08-01 08:25:00	<	24
141.014	37.2417	20.4835	2011-08-02 08:05:00	<	24
141.026	37.3222	11.455	2011-08-02 08:30:00	<	24
141.2	37.2333	25.851	2011-08-03 07:05:00	<	5
141.2	37.2333	25.851	2011-08-03 07:05:00	<	5
141.2	37.3333	17.8123	2011-08-03 07:40:00	<	5
141.2	37.3333	17.8123	2011-08-03 07:40:00	<	5
141.014	37.2417	20.4835	2011-08-03 07:55:00	4.8	24
141.2	37.4167	14.6356	2011-08-03 08:20:00	<	5
141.2	37.4167	14.6356	2011-08-03 08:20:00	<	5
141.026	37.3222	11.455	2011-08-03 08:25:00	<	24
141.2	37.5833	22.9052	2011-08-03 08:25:00	<	5
141.2	37.5833	22.9052	2011-08-03 08:25:00	<	5
141.2	37.5	16.8324	2011-08-03 08:45:00	<	5
141.2	37.5	16.8324	2011-08-03 08:45:00	<	5
141.047	37.2417	20.4295	2011-08-04 07:40:00	<	5
141.047	37.2417	20.4295	2011-08-04 07:40:00	<	5
141.014	37.2417	20.4835	2011-08-04 08:05:00	<	24
141.106	37.2833	16.9577	2011-08-04 08:05:00	<	5
141.106	37.2833	16.9577	2011-08-04 08:05:00	<	5
141.026	37.3222	11.455	2011-08-04 08:30:00	<	24
141.2	37.5833	22.9052	2011-08-04 08:30:00	<	5
141.2	37.5833	22.9052	2011-08-04 08:30:00	<	5
141.2	37.2333	25.851	2011-08-04 08:35:00	<	5
141.2	37.2333	25.851	2011-08-04 08:35:00	<	5
141.061	37.6	19.6377	2011-08-04 09:05:00	<	5
141.061	37.6	19.6377	2011-08-04 09:05:00	<	5
141.062	37.5528	14.4507	2011-08-04 09:15:00	<	5
141.062	37.5528	14.4507	2011-08-04 09:15:00	<	5
141.122	37.5306	14.0791	2011-08-04 09:35:00	<	5
141.122	37.5306	14.0791	2011-08-04 09:35:00	<	5
141.014	37.2417	20.4835	2011-08-05 07:50:00	<	24
141.026	37.3222	11.455	2011-08-05 08:15:00	<	24
141.047	37.2417	20.4295	2011-08-06 06:50:00	<	5
141.047	37.2417	20.4295	2011-08-06 06:50:00	<	5
141.106	37.2833	16.9577	2011-08-06 07:15:00	<	5
141.106	37.2833	16.9577	2011-08-06 07:15:00	<	5
141.014	37.2417	20.4835	2011-08-06 07:45:00	<	24
141.026	37.3222	11.455	2011-08-06 08:10:00	<	24
141.061	37.6	19.6377	2011-08-06 08:45:00	<	5
141.061	37.6	19.6377	2011-08-06 08:45:00	<	5
141.062	37.5528	14.4507	2011-08-06 09:00:00	<	5
141.062	37.5528	14.4507	2011-08-06 09:00:00	<	5
141.122	37.5306	14.0791	2011-08-06 09:20:00	<	5
141.122	37.5306	14.0791	2011-08-06 09:20:00	<	5
141.014	37.2417	20.4835	2011-08-07 07:45:00	<	24
141.026	37.3222	11.455	2011-08-07 08:10:00	<	24
141.2	37.5	16.8324	2011-08-07 08:10:00	<	4
141.2	37.5	16.8324	2011-08-07 08:10:00	<	4
141.2	37.4167	14.6356	2011-08-07 08:35:00	<	4
141.2	37.4167	14.6356	2011-08-07 08:35:00	<	4
141.2	37.3333	17.8123	2011-08-07 09:20:00	<	4
141.2	37.3333	17.8123	2011-08-07 09:20:00	<	4
141.2	37.2333	25.851	2011-08-08 07:30:00	<	5
141.2	37.2333	25.851	2011-08-08 07:30:00	<	5
141.014	37.2417	20.4835	2011-08-08 08:25:00	<	24
141.2	37.5833	22.9052	2011-08-08 09:15:00	<	5
141.2	37.5833	22.9052	2011-08-08 09:15:00	<	5
141.061	37.6	19.6377	2011-08-08 09:50:00	<	5
141.061	37.6	19.6377	2011-08-08 09:50:00	<	5
141.062	37.5528	14.4507	2011-08-08 10:05:00	<	5
141.062	37.5528	14.4507	2011-08-08 10:05:00	<	5
141.122	37.5306	14.0791	2011-08-08 10:30:00	<	5
141.122	37.5306	14.0791	2011-08-08 10:30:00	<	5
141.106	37.2833	16.9577	2011-08-08 11:40:00	<	5
141.106	37.2833	16.9577	2011-08-08 11:40:00	<	5
141.047	37.2417	20.4295	2011-08-08 12:00:00	<	5
141.047	37.2417	20.4295	2011-08-08 12:00:00	<	5
141.026	37.3222	11.455	2011-08-08 16:30:00	<	24
141.014	37.2417	20.4835	2011-08-09 07:35:00	<	9
141.026	37.3222	11.455	2011-08-09 08:05:00	<	9
141.014	37.2417	20.4835	2011-08-10 07:35:00	<	9
141.122	37.5306	14.0791	2011-08-10 07:35:00	<	9
141.122	37.5306	14.0791	2011-08-10 07:35:00	<	9
141.062	37.5528	14.4507	2011-08-10 07:50:00	<	9
141.062	37.5528	14.4507	2011-08-10 07:50:00	<	9
141.026	37.3222	11.455	2011-08-10 08:05:00	<	9
141.061	37.6	19.6377	2011-08-10 08:05:00	<	9
141.061	37.6	19.6377	2011-08-10 08:05:00	<	9
141.106	37.2833	16.9577	2011-08-10 08:50:00	<	9
141.106	37.2833	16.9577	2011-08-10 08:50:00	<	9
141.047	37.2417	20.4295	2011-08-10 09:25:00	<	9
141.047	37.2417	20.4295	2011-08-10 09:25:00	<	9
141.2	37.2333	25.851	2011-08-11 06:55:00	<	9
141.2	37.2333	25.851	2011-08-11 06:55:00	<	9
141.2	37.5	16.8324	2011-08-11 07:33:00	<	9
141.2	37.5	16.8324	2011-08-11 07:33:00	<	9
141.2	37.3333	17.8123	2011-08-11 07:35:00	<	9
141.2	37.3333	17.8123	2011-08-11 07:35:00	<	9
141.014	37.2417	20.4835	2011-08-11 07:40:00	<	9
141.2	37.4167	14.6356	2011-08-11 07:55:00	<	9
141.2	37.4167	14.6356	2011-08-11 07:55:00	<	9
141.026	37.3222	11.455	2011-08-11 08:10:00	<	9
141.2	37.5833	22.9052	2011-08-11 08:10:00	<	9
141.2	37.5833	22.9052	2011-08-11 08:10:00	<	9
141.047	37.2417	20.4295	2011-08-12 06:30:00	<	9
141.047	37.2417	20.4295	2011-08-12 06:30:00	<	9
141.106	37.2833	16.9577	2011-08-12 06:45:00	<	9
141.106	37.2833	16.9577	2011-08-12 06:45:00	<	9
141.062	37.5528	14.4507	2011-08-12 07:25:00	<	9
141.062	37.5528	14.4507	2011-08-12 07:25:00	<	9
141.014	37.2417	20.4835	2011-08-12 07:35:00	<	35
141.061	37.6	19.6377	2011-08-12 07:40:00	<	9
141.061	37.6	19.6377	2011-08-12 07:40:00	<	9
141.026	37.3222	11.455	2011-08-12 08:00:00	<	35
141.122	37.5306	14.0791	2011-08-12 08:20:00	<	9
141.122	37.5306	14.0791	2011-08-12 08:20:00	<	9
141.2	37.3333	17.8123	2011-08-13 07:05:00	<	9
141.2	37.3333	17.8123	2011-08-13 07:05:00	<	9
141.2	37.5	16.8324	2011-08-13 07:35:00	<	9
141.2	37.5	16.8324	2011-08-13 07:35:00	<	9
141.2	37.4167	14.6356	2011-08-13 07:45:00	<	9
141.2	37.4167	14.6356	2011-08-13 07:45:00	<	9
141.047	37.2417	20.4295	2011-08-14 06:40:00	<	9
141.047	37.2417	20.4295	2011-08-14 06:40:00	<	9
141.106	37.2833	16.9577	2011-08-14 07:05:00	<	9
141.106	37.2833	16.9577	2011-08-14 07:05:00	<	9
141.014	37.2417	20.4835	2011-08-14 07:40:00	<	9
141.062	37.5528	14.4507	2011-08-14 07:45:00	<	9
141.062	37.5528	14.4507	2011-08-14 07:45:00	<	9
141.026	37.3222	11.455	2011-08-14 08:10:00	<	9
141.061	37.6	19.6377	2011-08-14 08:10:00	<	9
141.061	37.6	19.6377	2011-08-14 08:10:00	<	9
141.122	37.5306	14.0791	2011-08-14 08:40:00	<	9
141.122	37.5306	14.0791	2011-08-14 08:40:00	<	9
141.014	37.2417	20.4835	2011-08-15 07:40:00	<	9
141.026	37.3222	11.455	2011-08-15 08:05:00	<	9
141.2	37.2333	25.851	2011-08-16 07:15:00	<	9
141.2	37.2333	25.851	2011-08-16 07:15:00	<	9
141.014	37.2417	20.4835	2011-08-16 07:40:00	<	9
141.2	37.5833	22.9052	2011-08-16 07:45:00	<	9
141.2	37.5833	22.9052	2011-08-16 07:45:00	<	9
141.026	37.3222	11.455	2011-08-16 08:05:00	<	9
141.106	37.2833	16.9577	2011-08-16 08:10:00	<	9
141.106	37.2833	16.9577	2011-08-16 08:10:00	<	9
141.061	37.6	19.6377	2011-08-16 08:15:00	<	9
141.061	37.6	19.6377	2011-08-16 08:15:00	<	9
141.062	37.5528	14.4507	2011-08-16 08:30:00	<	9
141.062	37.5528	14.4507	2011-08-16 08:30:00	<	9
141.047	37.2417	20.4295	2011-08-16 08:40:00	<	9
141.047	37.2417	20.4295	2011-08-16 08:40:00	<	9
141.122	37.5306	14.0791	2011-08-16 08:50:00	<	9
141.122	37.5306	14.0791	2011-08-16 08:50:00	<	9
141.014	37.2417	20.4835	2011-08-17 07:40:00	<	9
141.026	37.3222	11.455	2011-08-17 08:05:00	<	9
141.014	37.2417	20.4835	2011-08-19 07:55:00	<	9
141.026	37.3222	11.455	2011-08-19 08:25:00	<	9
141.014	37.2417	20.4835	2011-08-20 07:45:00	<	9
141.026	37.3222	11.455	2011-08-20 08:10:00	<	9
141.014	37.2417	20.4835	2011-08-21 07:45:00	<	9
141.026	37.3222	11.455	2011-08-21 08:10:00	<	9
141.014	37.2417	20.4835	2011-08-22 07:55:00	<	9
141.026	37.3222	11.455	2011-08-22 08:20:00	<	9
141.2	37.2333	25.851	2011-08-23 07:25:00	<	9
141.2	37.2333	25.851	2011-08-23 07:25:00	<	9
141.014	37.2417	20.4835	2011-08-23 07:50:00	<	9
141.2	37.3333	17.8123	2011-08-23 07:55:00	<	9
141.2	37.3333	17.8123	2011-08-23 07:55:00	<	9
141.026	37.3222	11.455	2011-08-23 08:20:00	<	9
141.2	37.4167	14.6356	2011-08-23 08:30:00	<	9
141.2	37.4167	14.6356	2011-08-23 08:30:00	<	9
141.2	37.5	16.8324	2011-08-23 08:35:00	<	9
141.2	37.5	16.8324	2011-08-23 08:35:00	<	9
141.2	37.5833	22.9052	2011-08-23 09:00:00	<	9
141.2	37.5833	22.9052	2011-08-23 09:00:00	<	9
141.014	37.2417	20.4835	2011-08-24 07:55:00	<	9
141.026	37.3222	11.455	2011-08-24 08:20:00	<	9
141.014	37.2417	20.4835	2011-08-25 08:00:00	<	9
141.026	37.3222	11.455	2011-08-25 08:25:00	<	9
141.047	37.2417	20.4295	2011-08-26 06:40:00	<	9
141.047	37.2417	20.4295	2011-08-26 06:40:00	<	9
141.106	37.2833	16.9577	2011-08-26 07:15:00	<	9
141.106	37.2833	16.9577	2011-08-26 07:15:00	<	9
141.2	37.2333	25.851	2011-08-26 07:40:00	<	9
141.2	37.2333	25.851	2011-08-26 07:40:00	<	9
141.014	37.2417	20.4835	2011-08-26 07:50:00	<	9
141.026	37.3222	11.455	2011-08-26 08:15:00	<	9
141.122	37.5306	14.0791	2011-08-26 08:30:00	<	9
141.122	37.5306	14.0791	2011-08-26 08:30:00	<	9
141.062	37.5528	14.4507	2011-08-26 08:50:00	<	9
141.062	37.5528	14.4507	2011-08-26 08:50:00	<	9
141.061	37.6	19.6377	2011-08-26 09:10:00	<	9
141.061	37.6	19.6377	2011-08-26 09:10:00	<	9
141.2	37.5833	22.9052	2011-08-26 09:30:00	<	9
141.2	37.5833	22.9052	2011-08-26 09:30:00	<	9
141.014	37.2417	20.4835	2011-08-27 07:40:00	<	9
141.2	37.3333	17.8123	2011-08-27 07:50:00	<	9
141.2	37.3333	17.8123	2011-08-27 07:50:00	<	9
141.026	37.3222	11.455	2011-08-27 08:05:00	<	9
141.2	37.4167	14.6356	2011-08-27 08:20:00	<	9
141.2	37.4167	14.6356	2011-08-27 08:20:00	<	9
141.2	37.5	16.8324	2011-08-27 08:55:00	<	9
141.2	37.5	16.8324	2011-08-27 08:55:00	<	9
141.047	37.2417	20.4295	2011-08-28 06:50:00	<	9
141.047	37.2417	20.4295	2011-08-28 06:50:00	<	9
141.106	37.2833	16.9577	2011-08-28 07:15:00	<	9
141.106	37.2833	16.9577	2011-08-28 07:15:00	<	9
141.014	37.2417	20.4835	2011-08-28 07:50:00	<	9
141.026	37.3222	11.455	2011-08-28 08:15:00	<	9
141.014	37.2417	20.4835	2011-08-29 07:55:00	<	9
141.026	37.3222	11.455	2011-08-29 08:20:00	<	9
141.047	37.2417	20.4295	2011-08-30 07:00:00	<	9
141.047	37.2417	20.4295	2011-08-30 07:00:00	<	9
141.106	37.2833	16.9577	2011-08-30 07:30:00	<	9
141.106	37.2833	16.9577	2011-08-30 07:30:00	<	9
141.014	37.2417	20.4835	2011-08-30 08:00:00	<	9
141.026	37.3222	11.455	2011-08-30 08:25:00	<	9
141.122	37.5306	14.0791	2011-08-30 08:40:00	<	9
141.122	37.5306	14.0791	2011-08-30 08:40:00	<	9
141.062	37.5528	14.4507	2011-08-30 09:00:00	<	9
141.062	37.5528	14.4507	2011-08-30 09:00:00	<	9
141.061	37.6	19.6377	2011-08-30 09:20:00	<	9
141.061	37.6	19.6377	2011-08-30 09:20:00	<	9
141.014	37.2417	20.4835	2011-08-31 07:50:00	<	9
141.026	37.3222	11.455	2011-08-31 08:20:00	<	9
141.014	37.2417	20.4835	2011-09-05 08:00:00	<	9
141.026	37.3222	11.455	2011-09-05 08:25:00	<	9
141.014	37.2417	20.4835	2011-09-06 07:55:00	<	9
141.014	37.2417	20.4835	2011-09-07 07:55:00	<	9
141.026	37.3222	11.455	2011-09-07 08:20:00	<	9
141.2	37.3333	17.8123	2011-09-08 07:30:00	<	9
141.2	37.3333	17.8123	2011-09-08 07:30:00	<	9
141.014	37.2417	20.4835	2011-09-08 08:00:00	<	9
141.2	37.4167	14.6356	2011-09-08 08:05:00	<	9
141.2	37.4167	14.6356	2011-09-08 08:05:00	<	9
141.026	37.3222	11.455	2011-09-08 08:30:00	<	9
141.2	37.5	16.8324	2011-09-08 08:50:00	<	9
141.2	37.5	16.8324	2011-09-08 08:50:00	<	9
141.047	37.2417	20.4295	2011-09-09 07:00:00	<	9
141.047	37.2417	20.4295	2011-09-09 07:00:00	<	9
141.106	37.2833	16.9577	2011-09-09 07:20:00	<	9
141.106	37.2833	16.9577	2011-09-09 07:20:00	<	9
141.014	37.2417	20.4835	2011-09-09 07:55:00	<	9
141.2	37.2333	25.851	2011-09-09 08:05:00	<	9
141.2	37.2333	25.851	2011-09-09 08:05:00	<	9
141.026	37.3222	11.455	2011-09-09 08:20:00	<	9
141.061	37.6	19.6377	2011-09-09 08:20:00	<	9
141.061	37.6	19.6377	2011-09-09 08:20:00	<	9
141.062	37.5528	14.4507	2011-09-09 08:35:00	<	9
141.062	37.5528	14.4507	2011-09-09 08:35:00	<	9
141.122	37.5306	14.0791	2011-09-09 08:55:00	<	9
141.122	37.5306	14.0791	2011-09-09 08:55:00	<	9
141.2	37.3333	17.8123	2011-09-10 06:55:00	<	9
141.2	37.3333	17.8123	2011-09-10 06:55:00	<	9
141.2	37.4167	14.6356	2011-09-10 07:30:00	<	9
141.2	37.4167	14.6356	2011-09-10 07:30:00	<	9
141.014	37.2417	20.4835	2011-09-10 07:50:00	<	9
141.026	37.3222	11.455	2011-09-10 08:10:00	<	9
141.2	37.5	16.8324	2011-09-10 08:15:00	<	9
141.2	37.5	16.8324	2011-09-10 08:15:00	<	9
141.014	37.2417	20.4835	2011-09-11 07:30:00	<	9
141.026	37.3222	11.455	2011-09-11 07:55:00	<	9
141.373	37.4167	29.9466	2011-09-11 13:23:00	0.01
141.373	37.4167	29.9466	2011-09-11 13:34:00	0.016
141.2	37.3333	17.8123	2011-09-12	<	9
141.2	37.4167	14.6356	2011-09-12		9
141.014	37.2417	20.4835	2011-09-12 07:45:00	<	9
141.2	37.3333	17.8123	2011-09-12 07:45:00	<	9
141.2	37.3333	17.8123	2011-09-12 07:45:00	<	9
141.026	37.3222	11.455	2011-09-12 08:15:00	<	9
141.2	37.4167	14.6356	2011-09-12 08:15:00	<	9
141.2	37.4167	14.6356	2011-09-12 08:15:00	<	9
141.2	37.5	16.8324	2011-09-12 08:45:00	<	9
141.2	37.5	16.8324	2011-09-12 08:45:00	<	9
141.047	37.2417	20.4295	2011-09-13 07:10:00	<	9
141.047	37.2417	20.4295	2011-09-13 07:10:00	<	9
141.106	37.2833	16.9577	2011-09-13 07:30:00	<	9
141.106	37.2833	16.9577	2011-09-13 07:30:00	<	9
141.014	37.2417	20.4835	2011-09-13 07:55:00	<	9
141.026	37.3222	11.455	2011-09-13 08:25:00	<	9
141.122	37.5306	14.0791	2011-09-13 08:40:00	<	9
141.122	37.5306	14.0791	2011-09-13 08:40:00	<	9
141.062	37.5528	14.4507	2011-09-13 09:20:00	<	9
141.062	37.5528	14.4507	2011-09-13 09:20:00	<	9
141.061	37.6	19.6377	2011-09-13 09:40:00	<	9
141.061	37.6	19.6377	2011-09-13 09:40:00	<	9
141.2	37.2333	25.851	2011-09-14 07:05:00	<	9
141.2	37.2333	25.851	2011-09-14 07:05:00	<	9
141.2	37.3333	17.8123	2011-09-14 07:35:00	<	9
141.2	37.3333	17.8123	2011-09-14 07:35:00	<	9
141.014	37.2417	20.4835	2011-09-14 07:50:00	<	9
141.2	37.4167	14.6356	2011-09-14 08:05:00	<	9
141.2	37.4167	14.6356	2011-09-14 08:05:00	<	9
141.2	37.5	16.8324	2011-09-14 08:10:00	<	9
141.2	37.5	16.8324	2011-09-14 08:10:00	<	9
141.026	37.3222	11.455	2011-09-14 08:15:00	<	9
141.2	37.5833	22.9052	2011-09-14 08:35:00	<	9
141.2	37.5833	22.9052	2011-09-14 08:35:00	<	9
141.014	37.2417	20.4835	2011-09-15 07:40:00	<	9
141.026	37.3222	11.455	2011-09-15 08:15:00	<	9
141.061	37.6	19.6377	2011-09-15 08:35:00	<	9
141.061	37.6	19.6377	2011-09-15 08:35:00	<	9
141.062	37.5528	14.4507	2011-09-15 08:55:00	<	9
141.062	37.5528	14.4507	2011-09-15 08:55:00	<	9
141.122	37.5306	14.0791	2011-09-15 09:20:00	<	9
141.122	37.5306	14.0791	2011-09-15 09:20:00	<	9
141.106	37.2833	16.9577	2011-09-15 10:30:00	<	9
141.106	37.2833	16.9577	2011-09-15 10:30:00	<	9
141.047	37.2417	20.4295	2011-09-15 11:15:00	<	9
141.047	37.2417	20.4295	2011-09-15 11:15:00	<	9
141.2	37.3333	17.8123	2011-09-16 07:20:00	<	9
141.2	37.3333	17.8123	2011-09-16 07:20:00	<	9
141.014	37.2417	20.4835	2011-09-16 07:45:00	<	9
141.026	37.3222	11.455	2011-09-16 08:10:00	<	9
141.2	37.2333	25.851	2011-09-25 06:50:00	<	9
141.2	37.2333	25.851	2011-09-25 06:50:00	<	9
141.047	37.2417	20.4295	2011-09-25 07:05:00	<	9
141.047	37.2417	20.4295	2011-09-25 07:05:00	<	9
141.106	37.2833	16.9577	2011-09-25 07:30:00	<	9
141.106	37.2833	16.9577	2011-09-25 07:30:00	<	9
141.2	37.5833	22.9052	2011-09-25 08:20:00	<	9
141.2	37.5833	22.9052	2011-09-25 08:20:00	<	9
141.061	37.6	19.6377	2011-09-25 08:45:00	<	9
141.061	37.6	19.6377	2011-09-25 08:45:00	<	9
141.062	37.5528	14.4507	2011-09-25 09:05:00	<	9
141.062	37.5528	14.4507	2011-09-25 09:05:00	<	9
141.122	37.5306	14.0791	2011-09-25 09:20:00	<	9
141.122	37.5306	14.0791	2011-09-25 09:20:00	<	9
141.2	37.3333	17.8123	2011-09-26 08:20:00	<	9
141.2	37.3333	17.8123	2011-09-26 08:20:00	<	9
141.2	37.4167	14.6356	2011-09-26 09:00:00	<	9
141.2	37.4167	14.6356	2011-09-26 09:00:00	<	9
141.2	37.5	16.8324	2011-09-26 09:30:00	<	9
141.2	37.5	16.8324	2011-09-26 09:30:00	<	9
141.2	37.2333	25.851	2011-10-02 07:45:00	<	9
141.2	37.2333	25.851	2011-10-02 07:45:00	<	9
141.2	37.3333	17.8123	2011-10-02 08:20:00	<	9
141.2	37.3333	17.8123	2011-10-02 08:20:00	<	9
141.2	37.4167	14.6356	2011-10-02 09:05:00	<	9
141.2	37.4167	14.6356	2011-10-02 09:05:00	<	9
141.2	37.5	16.8324	2011-10-02 09:35:00	<	9
141.2	37.5	16.8324	2011-10-02 09:35:00	<	9
141.2	37.5833	22.9052	2011-10-02 10:05:00	<	9
141.2	37.5833	22.9052	2011-10-02 10:05:00	<	9
141.047	37.2417	20.4295	2011-10-03 07:15:00	<	9
141.047	37.2417	20.4295	2011-10-03 07:15:00	<	9
141.106	37.2833	16.9577	2011-10-03 07:35:00	<	9
141.106	37.2833	16.9577	2011-10-03 07:35:00	<	9
141.014	37.2417	20.4835	2011-10-03 07:55:00	<	9
141.026	37.3222	11.455	2011-10-03 08:25:00	<	9
141.2	37.4167	14.6356	2011-10-04 07:20:00	<	9
141.2	37.4167	14.6356	2011-10-04 07:20:00	<	9
141.2	37.5	16.8324	2011-10-04 07:45:00	<	9
141.2	37.5	16.8324	2011-10-04 07:45:00	<	9
141.014	37.2417	20.4835	2011-10-04 08:00:00	<	9
141.2	37.3333	17.8123	2011-10-04 08:00:00	<	9
141.2	37.3333	17.8123	2011-10-04 08:00:00	<	9
141.026	37.3222	11.455	2011-10-04 08:25:00	<	9
141.047	37.2417	20.4295	2011-10-05 07:20:00	<	9
141.047	37.2417	20.4295	2011-10-05 07:20:00	<	9
141.106	37.2833	16.9577	2011-10-05 07:40:00	<	9
141.106	37.2833	16.9577	2011-10-05 07:40:00	<	9
141.122	37.5306	14.0791	2011-10-05 07:50:00	<	9
141.122	37.5306	14.0791	2011-10-05 07:50:00	<	9
141.014	37.2417	20.4835	2011-10-05 07:55:00	<	9
141.2	37.2333	25.851	2011-10-05 08:10:00	<	9
141.2	37.2333	25.851	2011-10-05 08:10:00	<	9
141.2	37.2333	25.851	2011-10-05 08:10:00	<	0.99
141.2	37.2333	25.851	2011-10-05 08:10:00	<	0.99
141.026	37.3222	11.455	2011-10-05 08:25:00	<	9
141.2	37.5833	22.9052	2011-10-05 08:30:00	<	9
141.2	37.5833	22.9052	2011-10-05 08:30:00	<	9
141.2	37.5833	22.9052	2011-10-05 08:30:00	<	0.99
141.2	37.5833	22.9052	2011-10-05 08:30:00	<	0.99
141.061	37.6	19.6377	2011-10-05 09:00:00	<	9
141.061	37.6	19.6377	2011-10-05 09:00:00	<	9
141.062	37.5528	14.4507	2011-10-05 09:15:00	<	9
141.062	37.5528	14.4507	2011-10-05 09:15:00	<	9
141.014	37.2417	20.4835	2011-10-06 08:05:00	<	9
141.026	37.3222	11.455	2011-10-06 08:30:00	<	9
141.014	37.2417	20.4835	2011-10-07 07:50:00	<	9
141.026	37.3222	11.455	2011-10-07 08:20:00	<	9
141.014	37.2417	20.4835	2011-10-08 07:45:00	<	9
141.2	37.3333	17.8123	2011-10-08 07:50:00	<	9
141.2	37.3333	17.8123	2011-10-08 07:50:00	<	9
141.2	37.3333	17.8123	2011-10-08 07:50:00	<	1
141.2	37.3333	17.8123	2011-10-08 07:50:00	<	1
141.026	37.3222	11.455	2011-10-08 08:15:00	<	9
141.2	37.4167	14.6356	2011-10-08 08:18:00	<	9
141.2	37.4167	14.6356	2011-10-08 08:18:00	<	9
141.2	37.4167	14.6356	2011-10-08 08:18:00	<	1
141.2	37.4167	14.6356	2011-10-08 08:18:00	<	1
141.2	37.5	16.8324	2011-10-08 08:47:00	<	9
141.2	37.5	16.8324	2011-10-08 08:47:00	<	9
141.2	37.5	16.8324	2011-10-08 08:47:00	<	1
141.2	37.5	16.8324	2011-10-08 08:47:00	<	1
141.047	37.2417	20.4295	2011-10-09 06:35:00	<	9
141.047	37.2417	20.4295	2011-10-09 06:35:00	<	9
141.106	37.2833	16.9577	2011-10-09 06:50:00	<	9
141.106	37.2833	16.9577	2011-10-09 06:50:00	<	9
141.014	37.2417	20.4835	2011-10-09 07:40:00	<	9
141.122	37.5306	14.0791	2011-10-09 07:50:00	<	9
141.122	37.5306	14.0791	2011-10-09 07:50:00	<	9
141.026	37.3222	11.455	2011-10-09 08:05:00	<	9
141.062	37.5528	14.4507	2011-10-09 08:10:00	<	9
141.062	37.5528	14.4507	2011-10-09 08:10:00	<	9
141.061	37.6	19.6377	2011-10-09 08:20:00	<	9
141.061	37.6	19.6377	2011-10-09 08:20:00	<	9
141.014	37.2417	20.4835	2011-10-10 07:35:00	<	9
141.026	37.3222	11.455	2011-10-10 08:00:00	<	9
141.2	37.3333	17.8123	2011-10-10 08:05:00	<	9
141.2	37.3333	17.8123	2011-10-10 08:05:00	<	9
141.2	37.4167	14.6356	2011-10-10 08:30:00	<	9
141.2	37.4167	14.6356	2011-10-10 08:30:00	<	9
141.047	37.2417	20.4295	2011-10-11 06:55:00	<	9
141.047	37.2417	20.4295	2011-10-11 06:55:00	<	9
141.047	37.2417	20.4295	2011-10-11 06:55:00	<	9
141.047	37.2417	20.4295	2011-10-11 06:55:00	<	9
141.106	37.2833	16.9577	2011-10-11 07:20:00	<	9
141.106	37.2833	16.9577	2011-10-11 07:20:00	<	9
141.106	37.2833	16.9577	2011-10-11 07:20:00	<	9
141.106	37.2833	16.9577	2011-10-11 07:20:00	<	9
141.014	37.2417	20.4835	2011-10-11 07:50:00	<	9
141.122	37.5306	14.0791	2011-10-11 08:20:00	<	9
141.122	37.5306	14.0791	2011-10-11 08:20:00	<	9
141.122	37.5306	14.0791	2011-10-11 08:20:00	<	9
141.122	37.5306	14.0791	2011-10-11 08:20:00	<	9
141.026	37.3222	11.455	2011-10-11 08:25:00	<	9
141.062	37.5528	14.4507	2011-10-11 08:35:00	<	9
141.062	37.5528	14.4507	2011-10-11 08:35:00	<	9
141.062	37.5528	14.4507	2011-10-11 08:35:00	<	9
141.062	37.5528	14.4507	2011-10-11 08:35:00	<	9
141.061	37.6	19.6377	2011-10-11 08:50:00	<	9
141.061	37.6	19.6377	2011-10-11 08:50:00	<	9
141.061	37.6	19.6377	2011-10-11 08:50:00	<	9
141.061	37.6	19.6377	2011-10-11 08:50:00	<	9
141.014	37.2417	20.4835	2011-10-12 08:00:00	<	9
141.026	37.3222	11.455	2011-10-12 08:25:00	<	9
141.2	37.2333	25.851	2011-10-13 06:50:00	<	9
141.2	37.2333	25.851	2011-10-13 06:50:00	<	9
141.047	37.2417	20.4295	2011-10-13 07:25:00	<	9
141.047	37.2417	20.4295	2011-10-13 07:25:00	<	9
141.106	37.2833	16.9577	2011-10-13 07:35:00	<	9
141.106	37.2833	16.9577	2011-10-13 07:35:00	<	9
141.014	37.2417	20.4835	2011-10-13 08:00:00	<	9
141.122	37.5306	14.0791	2011-10-13 08:30:00	<	9
141.122	37.5306	14.0791	2011-10-13 08:30:00	<	9
141.026	37.3222	11.455	2011-10-13 08:40:00	<	9
141.2	37.5833	22.9052	2011-10-13 08:50:00	<	9
141.2	37.5833	22.9052	2011-10-13 08:50:00	<	9
141.061	37.6	19.6377	2011-10-13 09:10:00	<	9
141.061	37.6	19.6377	2011-10-13 09:10:00	<	9
141.062	37.5528	14.4507	2011-10-13 09:25:00	<	9
141.062	37.5528	14.4507	2011-10-13 09:25:00	<	9
141.014	37.2417	20.4835	2011-10-14 07:55:00	<	9
141.026	37.3222	11.455	2011-10-14 08:25:00	<	9
141.2	37.3333	17.8123	2011-10-14 09:30:00	<	9
141.2	37.3333	17.8123	2011-10-14 09:30:00	<	9
141.2	37.4167	14.6356	2011-10-14 10:20:00	<	9
141.2	37.4167	14.6356	2011-10-14 10:20:00	<	9
141.2	37.5	16.8324	2011-10-14 11:00:00	<	9
141.2	37.5	16.8324	2011-10-14 11:00:00	<	9
141.014	37.2417	20.4835	2011-10-16 07:35:00	<	9
141.026	37.3222	11.455	2011-10-16 08:00:00	<	9
141.014	37.2417	20.4835	2011-10-17 08:00:00	<	9
141.026	37.3222	11.455	2011-10-17 08:25:00	<	9
141.122	37.5306	14.0791	2011-10-17 08:55:00	<	9
141.122	37.5306	14.0791	2011-10-17 08:55:00	<	9
141.047	37.2417	20.4295	2011-10-17 09:00:00	<	9
141.047	37.2417	20.4295	2011-10-17 09:00:00	<	9
141.062	37.5528	14.4507	2011-10-17 09:10:00	<	9
141.062	37.5528	14.4507	2011-10-17 09:10:00	<	9
141.061	37.6	19.6377	2011-10-17 09:20:00	<	9
141.061	37.6	19.6377	2011-10-17 09:20:00	<	9
141.106	37.2833	16.9577	2011-10-17 09:30:00	<	9
141.106	37.2833	16.9577	2011-10-17 09:30:00	<	9
141.014	37.2417	20.4835	2011-10-18 07:55:00	<	9
141.026	37.3222	11.455	2011-10-18 08:20:00	<	9
141.014	37.2417	20.4835	2011-10-19 07:50:00	<	9
141.026	37.3222	11.455	2011-10-19 08:15:00	<	9
141.014	37.2417	20.4835	2011-10-20 08:00:00	<	9
141.026	37.3222	11.455	2011-10-20 08:25:00	<	9
141.014	37.2417	20.4835	2011-10-21 08:00:00	<	9
141.026	37.3222	11.455	2011-10-21 08:25:00	<	9
141.014	37.2417	20.4835	2011-10-22 07:50:00	<	9
141.026	37.3222	11.455	2011-10-22 08:10:00	<	9
141.373	37.4167	29.9466	2011-10-22 10:02:00	0.024
141.373	37.4167	29.9466	2011-10-22 10:17:00	0.023
141.014	37.2417	20.4835	2011-10-23 08:00:00	<	9
141.026	37.3222	11.455	2011-10-23 08:25:00	<	9
141.014	37.2417	20.4835	2011-10-24 08:05:00	<	1
141.026	37.3222	11.455	2011-10-24 08:30:00	<	1
141.047	37.2417	20.4295	2011-10-25 07:30:00	<	1.1
141.047	37.2417	20.4295	2011-10-25 07:30:00	<	1.1
141.106	37.2833	16.9577	2011-10-25 07:55:00	<	1.1
141.106	37.2833	16.9577	2011-10-25 07:55:00	<	1.1
141.122	37.5306	14.0791	2011-10-25 08:55:00	<	1.1
141.122	37.5306	14.0791	2011-10-25 08:55:00	<	1.1
141.062	37.5528	14.4507	2011-10-25 09:10:00	<	1.1
141.062	37.5528	14.4507	2011-10-25 09:10:00	<	1.1
141.061	37.6	19.6377	2011-10-25 09:25:00	<	1.1
141.061	37.6	19.6377	2011-10-25 09:25:00	<	1.1
141.026	37.3222	11.455	2011-10-26 08:20:00	<	1
141.014	37.2417	20.4835	2011-10-26 15:25:00	<	1
141.014	37.2417	20.4835	2011-10-27 07:55:00	<	1
141.026	37.3222	11.455	2011-10-27 08:20:00	<	1
141.2	37.3333	17.8123	2011-10-28 08:15:00	<	1.1
141.2	37.3333	17.8123	2011-10-28 08:15:00	<	1.1
141.2	37.4167	14.6356	2011-10-28 08:50:00	<	1.1
141.2	37.4167	14.6356	2011-10-28 08:50:00	<	1.1
141.2	37.5	16.8324	2011-10-28 09:15:00	<	1.1
141.2	37.5	16.8324	2011-10-28 09:15:00	<	1.1
141.047	37.2417	20.4295	2011-10-29 07:25:00	<	1.1
141.047	37.2417	20.4295	2011-10-29 07:25:00	<	1.1
141.106	37.2833	16.9577	2011-10-29 07:50:00	<	1.1
141.106	37.2833	16.9577	2011-10-29 07:50:00	<	1.1
141.014	37.2417	20.4835	2011-10-29 07:55:00	<	1
141.026	37.3222	11.455	2011-10-29 08:15:00	<	1
141.122	37.5306	14.0791	2011-10-29 08:50:00	<	1.1
141.122	37.5306	14.0791	2011-10-29 08:50:00	<	1.1
141.062	37.5528	14.4507	2011-10-29 09:10:00	<	1.1
141.062	37.5528	14.4507	2011-10-29 09:10:00	<	1.1
141.061	37.6	19.6377	2011-10-29 09:20:00	<	1.1
141.061	37.6	19.6377	2011-10-29 09:20:00	<	1.1
141.014	37.2417	20.4835	2011-10-30 07:20:00	<	1
141.026	37.3222	11.455	2011-10-30 07:50:00	1	1
141.014	37.2417	20.4835	2011-10-31 08:05:00	1	1
141.026	37.3222	11.455	2011-10-31 08:35:00	<	1
141.014	37.2417	20.4835	2011-11-01 07:50:00	<	1
141.026	37.3222	11.455	2011-11-01 08:20:00	<	1
141.047	37.2417	20.4295	2011-11-02 07:45:00	<	1.1
141.047	37.2417	20.4295	2011-11-02 07:45:00	<	1.1
141.014	37.2417	20.4835	2011-11-02 07:55:00	<	1.1
141.106	37.2833	16.9577	2011-11-02 08:10:00	<	1.1
141.106	37.2833	16.9577	2011-11-02 08:10:00	<	1.1
141.122	37.5306	14.0791	2011-11-02 08:20:00	<	1.1
141.122	37.5306	14.0791	2011-11-02 08:20:00	<	1.1
141.026	37.3222	11.455	2011-11-02 08:25:00	1.3	1.1
141.2	37.3333	17.8123	2011-11-02 09:10:00	<	1.1
141.2	37.3333	17.8123	2011-11-02 09:10:00	<	1.1
141.061	37.6	19.6377	2011-11-02 09:15:00	<	1.1
141.061	37.6	19.6377	2011-11-02 09:15:00	<	1.1
141.062	37.5528	14.4507	2011-11-02 09:30:00	<	1.1
141.062	37.5528	14.4507	2011-11-02 09:30:00	<	1.1
141.2	37.4167	14.6356	2011-11-02 09:40:00	<	1.1
141.2	37.4167	14.6356	2011-11-02 09:40:00	<	1.1
141.2	37.3333	17.8123	2011-11-03 07:40:00		0.3
141.014	37.2417	20.4835	2011-11-03 07:45:00	1.1	1.1
141.026	37.3222	11.455	2011-11-03 08:05:00	<	1.1
141.2	37.4167	14.6356	2011-11-03 08:15:00		0.3
141.047	37.2417	20.4295	2011-11-04 07:15:00	<	1.1
141.047	37.2417	20.4295	2011-11-04 07:15:00	<	1.1
141.106	37.2833	16.9577	2011-11-04 07:30:00	<	1.1
141.106	37.2833	16.9577	2011-11-04 07:30:00	<	1.1
141.014	37.2417	20.4835	2011-11-04 07:50:00	1.2	1.1
141.026	37.3222	11.455	2011-11-04 08:20:00	<	1.1
141.122	37.5306	14.0791	2011-11-04 09:00:00	<	1.1
141.122	37.5306	14.0791	2011-11-04 09:00:00	<	1.1
141.061	37.6	19.6377	2011-11-04 09:20:00	<	1.1
141.061	37.6	19.6377	2011-11-04 09:20:00	<	1.1
141.062	37.5528	14.4507	2011-11-04 09:30:00	<	1.1
141.062	37.5528	14.4507	2011-11-04 09:30:00	<	1.1
141.014	37.2417	20.4835	2011-11-05 08:00:00	1.1	1.1
141.2	37.3333	17.8123	2011-11-05 08:10:00	<	1
141.2	37.3333	17.8123	2011-11-05 08:10:00	<	1
141.026	37.3222	11.455	2011-11-05 08:20:00	<	1.1
141.2	37.4167	14.6356	2011-11-05 08:40:00	<	1
141.2	37.4167	14.6356	2011-11-05 08:40:00	<	1
141.2	37.5	16.8324	2011-11-05 09:25:00	<	1
141.2	37.5	16.8324	2011-11-05 09:25:00	<	1
141.047	37.2417	20.4295	2011-11-06 07:10:00	<	1.1
141.047	37.2417	20.4295	2011-11-06 07:10:00	<	1.1
141.106	37.2833	16.9577	2011-11-06 07:25:00	<	1.1
141.106	37.2833	16.9577	2011-11-06 07:25:00	<	1.1
141.014	37.2417	20.4835	2011-11-06 07:50:00	<	1
141.026	37.3222	11.455	2011-11-06 08:15:00	<	1
141.122	37.5306	14.0791	2011-11-06 08:15:00	<	1.1
141.122	37.5306	14.0791	2011-11-06 08:15:00	<	1.1
141.062	37.5528	14.4507	2011-11-06 08:35:00	<	1.1
141.062	37.5528	14.4507	2011-11-06 08:35:00	<	1.1
141.061	37.6	19.6377	2011-11-06 08:50:00	<	1.1
141.061	37.6	19.6377	2011-11-06 08:50:00	<	1.1
141.014	37.2417	20.4835	2011-11-07 08:00:00	1.9	1
141.026	37.3222	11.455	2011-11-07 08:25:00	<	1
141.014	37.2417	20.4835	2011-11-08 08:05:00	1.8
141.026	37.3222	11.455	2011-11-08 08:30:00	1.8
141.2	37.2333	25.851	2011-11-09 07:45:00	<	1.1
141.2	37.2333	25.851	2011-11-09 07:45:00	<	1.1
141.014	37.2417	20.4835	2011-11-09 08:00:00	1.1
141.2	37.3333	17.8123	2011-11-09 08:20:00	1.2	1.1
141.2	37.3333	17.8123	2011-11-09 08:20:00	<	1.1
141.026	37.3222	11.455	2011-11-09 08:25:00	1.5
141.2	37.5	16.8324	2011-11-09 09:10:00	<	1.1
141.2	37.5	16.8324	2011-11-09 09:10:00	<	1.1
141.2	37.5833	22.9052	2011-11-09 09:30:00	<	1.1
141.2	37.5833	22.9052	2011-11-09 09:30:00	<	1.1
141.2	37.4167	14.6356	2011-11-09 16:00:00	<	1.1
141.2	37.4167	14.6356	2011-11-09 16:00:00	<	1.1
141.047	37.2417	20.4295	2011-11-10 07:40:00	<	1
141.047	37.2417	20.4295	2011-11-10 07:40:00	<	1
141.014	37.2417	20.4835	2011-11-10 08:00:00	1.8
141.106	37.2833	16.9577	2011-11-10 08:00:00	<	1
141.106	37.2833	16.9577	2011-11-10 08:00:00	<	1
141.026	37.3222	11.455	2011-11-10 08:25:00	1.8
141.061	37.6	19.6377	2011-11-10 10:20:00	<	1
141.061	37.6	19.6377	2011-11-10 10:20:00	<	1
141.062	37.5528	14.4507	2011-11-10 10:50:00	<	1
141.062	37.5528	14.4507	2011-11-10 10:50:00	<	1
141.122	37.5306	14.0791	2011-11-10 11:10:00	<	1
141.122	37.5306	14.0791	2011-11-10 11:10:00	<	1
141.014	37.2417	20.4835	2011-11-11 07:55:00	1.2
141.2	37.3333	17.8123	2011-11-11 08:00:00	<	1
141.2	37.3333	17.8123	2011-11-11 08:00:00	<	1
141.026	37.3222	11.455	2011-11-11 08:20:00	2
141.2	37.4167	14.6356	2011-11-11 08:45:00	<	1
141.2	37.4167	14.6356	2011-11-11 08:45:00	<	1
141.2	37.5	16.8324	2011-11-11 09:20:00	<	1
141.2	37.5	16.8324	2011-11-11 09:20:00	<	1
141.014	37.2417	20.4835	2011-11-12 07:30:00	<	0.99
141.026	37.3222	11.455	2011-11-12 08:05:00	<	0.99
141.014	37.2417	20.4835	2011-11-13 07:40:00	1.3	1.1
141.026	37.3222	11.455	2011-11-13 08:00:00	<	1.1
141.014	37.2417	20.4835	2011-11-14 08:00:00	1.2
141.047	37.2417	20.4295	2011-11-14 08:00:00	<	1.1
141.047	37.2417	20.4295	2011-11-14 08:00:00	<	1.1
141.106	37.2833	16.9577	2011-11-14 08:25:00	<	1.1
141.106	37.2833	16.9577	2011-11-14 08:25:00	<	1.1
141.026	37.3222	11.455	2011-11-14 08:30:00	2.1
141.122	37.5306	14.0791	2011-11-14 09:35:00	<	1.1
141.122	37.5306	14.0791	2011-11-14 09:35:00	<	1.1
141.062	37.5528	14.4507	2011-11-14 09:55:00	<	1.1
141.062	37.5528	14.4507	2011-11-14 09:55:00	<	1.1
141.061	37.6	19.6377	2011-11-14 10:15:00	<	1.1
141.061	37.6	19.6377	2011-11-14 10:15:00	<	1.1
141.014	37.2417	20.4835	2011-11-15 08:00:00	<	1
141.026	37.3222	11.455	2011-11-15 08:25:00	<	1
141.2	37.3333	17.8123	2011-11-15 08:35:00	<	1.1
141.2	37.3333	17.8123	2011-11-15 08:35:00	<	1.1
141.2	37.4167	14.6356	2011-11-15 09:05:00	<	1.1
141.2	37.4167	14.6356	2011-11-15 09:05:00	<	1.1
141.014	37.2417	20.4835	2011-11-16 07:55:00	1.7
141.026	37.3222	11.455	2011-11-16 08:20:00	1.1
141.014	37.2417	20.4835	2011-11-17 07:50:00	<	1
141.026	37.3222	11.455	2011-11-17 08:20:00	1	1
141.014	37.2417	20.4835	2011-11-18 07:55:00	<	1
141.026	37.3222	11.455	2011-11-18 08:25:00	1.2	1
141.2	37.2333	25.8507	2011-11-18 08:45:00	0.024	0.013
141.2	37.2333	25.851	2011-11-18 08:45:00	<	1.1
141.2	37.2333	25.851	2011-11-18 08:45:00	<	1.1
141.2	37.5833	22.9055	2011-11-18 10:30:00	0.03	0.013
141.2	37.5833	22.9052	2011-11-18 10:30:00	<	1.1
141.2	37.5833	22.9052	2011-11-18 10:30:00	<	1.1
141.061	37.6	19.6377	2011-11-18 11:05:00	<	1
141.061	37.6	19.6377	2011-11-18 11:05:00	<	1
141.062	37.5528	14.4507	2011-11-18 11:25:00	<	1
141.062	37.5528	14.4507	2011-11-18 11:25:00	<	1
141.106	37.2833	16.9577	2011-11-18 12:50:00	<	1
141.106	37.2833	16.9577	2011-11-18 12:50:00	<	1
141.047	37.2417	20.4295	2011-11-18 13:50:00	<	1
141.047	37.2417	20.4295	2011-11-18 13:50:00	<	1
141.014	37.2417	20.4835	2011-11-19 07:40:00	<	1
141.026	37.3222	11.455	2011-11-19 08:05:00	<	1
141.014	37.2417	20.4835	2011-11-20 08:05:00	<	1.1
141.026	37.3222	11.455	2011-11-20 08:30:00	<	1.1
141.014	37.2417	20.4835	2011-11-21 07:55:00	1.3	1
141.026	37.3222	11.455	2011-11-21 08:20:00	<	1
141.014	37.2417	20.4835	2011-11-22 07:55:00	1.5	1.1
141.047	37.2417	20.4295	2011-11-22 07:55:00	<	1.1
141.047	37.2417	20.4295	2011-11-22 07:55:00	<	1.1
141.106	37.2833	16.9577	2011-11-22 08:20:00	<	1.1
141.106	37.2833	16.9577	2011-11-22 08:20:00	<	1.1
141.026	37.3222	11.455	2011-11-22 08:25:00	<	1.1
141.122	37.5306	14.0791	2011-11-22 09:30:00	<	1.1
141.122	37.5306	14.0791	2011-11-22 09:30:00	<	1.1
141.062	37.5528	14.4507	2011-11-22 09:55:00	<	1.1
141.062	37.5528	14.4507	2011-11-22 09:55:00	<	1.1
141.061	37.6	19.6377	2011-11-22 10:10:00	<	1.1
141.061	37.6	19.6377	2011-11-22 10:10:00	<	1.1
141.071	37.4229	3.19993	2011-11-22 10:42:00	<	1
141.127	37.4229	8.13122	2011-11-22 11:58:00	<	1
141.014	37.2417	20.4835	2011-11-23 07:55:00	<	1
141.026	37.3222	11.455	2011-11-23 08:20:00	<	1
141.014	37.2417	20.4835	2011-11-24 08:00:00	1.3
141.026	37.3222	11.455	2011-11-24 08:25:00	1.3
141.014	37.2417	20.4835	2011-11-25 07:50:00	<	1
141.026	37.3222	11.455	2011-11-25 08:15:00	<	1
141.014	37.2417	20.4835	2011-11-26 07:30:00	<	1
141.047	37.2417	20.4295	2011-11-26 07:35:00	<	1
141.047	37.2417	20.4295	2011-11-26 07:35:00	<	1
141.026	37.3222	11.455	2011-11-26 07:50:00	<	1
141.106	37.2833	16.9577	2011-11-26 07:55:00	<	1
141.106	37.2833	16.9577	2011-11-26 07:55:00	<	1
141.122	37.5306	14.0791	2011-11-26 09:05:00	<	1
141.122	37.5306	14.0791	2011-11-26 09:05:00	<	1
141.062	37.5528	14.4507	2011-11-26 09:25:00	<	1
141.062	37.5528	14.4507	2011-11-26 09:25:00	<	1
141.061	37.6	19.6377	2011-11-26 09:40:00	<	1
141.061	37.6	19.6377	2011-11-26 09:40:00	<	1
141.2	37.5833	22.9052	2011-11-26 10:15:00	<	1.1
141.2	37.5833	22.9052	2011-11-26 10:15:00	<	1.1
141.2	37.5	16.8324	2011-11-26 10:45:00	0.065	0.013
141.2	37.2333	25.851	2011-11-26 11:55:00	<	1.1
141.2	37.2333	25.851	2011-11-26 11:55:00	<	1.1
141.014	37.2417	20.4835	2011-11-27 08:00:00	<	1
141.2	37.3333	17.8123	2011-11-27 08:10:00	<	1.1
141.2	37.3333	17.8123	2011-11-27 08:10:00	<	1.1
141.026	37.3222	11.455	2011-11-27 08:20:00	1.2	1
141.2	37.4167	14.6356	2011-11-27 08:40:00	<	1.1
141.2	37.4167	14.6356	2011-11-27 08:40:00	<	1.1
141.2	37.5	16.8324	2011-11-27 09:10:00	<	1.1
141.2	37.5	16.8324	2011-11-27 09:10:00	<	1.1
141.014	37.2417	20.4835	2011-11-28 07:55:00	<	1.1
141.047	37.2417	20.4295	2011-11-28 08:00:00	<	1
141.047	37.2417	20.4295	2011-11-28 08:00:00	<	1
141.026	37.3222	11.455	2011-11-28 08:20:00	<	1.1
141.106	37.2833	16.9577	2011-11-28 08:20:00	<	1
141.106	37.2833	16.9577	2011-11-28 08:20:00	<	1
141.122	37.5306	14.0791	2011-11-28 09:30:00	<	1
141.122	37.5306	14.0791	2011-11-28 09:30:00	<	1
141.062	37.5528	14.4507	2011-11-28 09:45:00	<	1
141.062	37.5528	14.4507	2011-11-28 09:45:00	<	1
141.061	37.6	19.6377	2011-11-28 10:05:00	<	1
141.061	37.6	19.6377	2011-11-28 10:05:00	<	1
141.014	37.2417	20.4835	2011-11-29 07:50:00	<	1.1
141.2	37.2333	25.851	2011-11-29 08:05:00	<	1.1
141.2	37.2333	25.851	2011-11-29 08:05:00	<	1.1
141.026	37.3222	11.455	2011-11-29 08:20:00	<	1.1
141.2	37.3333	17.8123	2011-11-29 08:35:00	<	1.1
141.2	37.3333	17.8123	2011-11-29 08:35:00	<	1.1
141.2	37.3333	17.8123	2011-11-29 08:35:00	<	1.1
141.2	37.3333	17.8123	2011-11-29 08:35:00	<	1.1
141.2	37.4167	14.6356	2011-11-29 09:05:00	<	1.1
141.2	37.4167	14.6356	2011-11-29 09:05:00	<	1.1
141.2	37.4167	14.6356	2011-11-29 09:05:00	<	1.1
141.2	37.4167	14.6356	2011-11-29 09:05:00	<	1.1
141.2	37.5	16.8324	2011-11-29 09:35:00	<	1.1
141.2	37.5	16.8324	2011-11-29 09:35:00	<	1.1
141.2	37.5	16.8324	2011-11-29 09:35:00	<	1.1
141.2	37.5	16.8324	2011-11-29 09:35:00	<	1.1
141.2	37.5	16.8324	2011-11-29 09:35:00	<	1.1
141.2	37.5	16.8324	2011-11-29 09:35:00	<	1.1
141.2	37.5	16.8324	2011-11-29 09:35:00	<	1
141.2	37.5	16.8324	2011-11-29 09:35:00	<	1
141.2	37.5	16.8324	2011-11-29 09:35:00	<	1.1
141.2	37.5	16.8324	2011-11-29 09:35:00	<	1.1
141.2	37.5	16.8324	2011-11-29 09:35:00	<	1.1
141.2	37.5	16.8324	2011-11-29 09:35:00	<	1.1
141.2	37.5	16.8324	2011-11-29 09:35:00	<	1
141.2	37.5	16.8324	2011-11-29 09:35:00	<	1
141.2	37.5	16.8324	2011-11-29 09:35:00	<	1.1
141.2	37.5	16.8324	2011-11-29 09:35:00	<	1.1
141.2	37.5	16.8324	2011-11-29 09:35:00	<	1
141.2	37.5	16.8324	2011-11-29 09:35:00	<	1
141.2	37.5833	22.9052	2011-11-29 10:05:00	<	1.1
141.2	37.5833	22.9052	2011-11-29 10:05:00	<	1.1
141.014	37.2417	20.4835	2011-11-30 08:00:00	1.8	1
141.026	37.3222	11.455	2011-11-30 08:25:00	<	1
141.014	37.2417	20.4835	2011-12-01 07:55:00	<	1
141.026	37.3222	11.455	2011-12-01 08:30:00	1.6	1
141.014	37.2417	20.4835	2011-12-02 08:00:00	<	1.1
141.026	37.3222	11.455	2011-12-02 08:20:00	1.4	1.1
141.014	37.2417	20.4835	2011-12-03 07:50:00	<	1
141.026	37.3222	11.455	2011-12-03 08:15:00	<	1
141.014	37.2417	20.4835	2011-12-04 08:00:00	1.2
141.014	37.2417	20.4835	2011-12-05 07:55:00	1.5	1
141.026	37.3222	11.455	2011-12-05 08:30:00	<	1
141.2	37.3333	17.8123	2011-12-05 09:45:00	<	1.1
141.2	37.3333	17.8123	2011-12-05 09:45:00	<	1.1
141.2	37.4167	14.6356	2011-12-05 10:20:00	<	1.1
141.2	37.4167	14.6356	2011-12-05 10:20:00	<	1.1
141.047	37.2417	20.4295	2011-12-06 07:35:00	<	1.1
141.047	37.2417	20.4295	2011-12-06 07:35:00	<	1.1
141.014	37.2417	20.4835	2011-12-06 08:00:00	<	1.1
141.106	37.2833	16.9577	2011-12-06 08:00:00	<	1.1
141.106	37.2833	16.9577	2011-12-06 08:00:00	<	1.1
141.026	37.3222	11.455	2011-12-06 08:25:00	<	1.1
141.122	37.5306	14.0791	2011-12-06 09:10:00	<	1.1
141.122	37.5306	14.0791	2011-12-06 09:10:00	<	1.1
141.062	37.5528	14.4507	2011-12-06 09:30:00	<	1.1
141.062	37.5528	14.4507	2011-12-06 09:30:00	<	1.1
141.061	37.6	19.6377	2011-12-06 09:50:00	<	1.1
141.061	37.6	19.6377	2011-12-06 09:50:00	<	1.1
141.014	37.2417	20.4835	2011-12-07 08:00:00	1.3	1.1
141.2	37.2333	25.851	2011-12-07 08:10:00	<	1.1
141.2	37.2333	25.851	2011-12-07 08:10:00	<	1.1
141.2	37.5833	22.9052	2011-12-07 08:15:00	<	1.1
141.2	37.5833	22.9052	2011-12-07 08:15:00	<	1.1
141.026	37.3222	11.455	2011-12-07 08:25:00	<	1.1
141.2	37.3333	17.8123	2011-12-07 08:45:00	<	1.1
141.2	37.3333	17.8123	2011-12-07 08:45:00	<	1.1
141.2	37.5	16.8324	2011-12-07 08:55:00	<	1.1
141.2	37.5	16.8324	2011-12-07 08:55:00	<	1.1
141.2	37.4167	14.6356	2011-12-07 09:20:00	<	1.1
141.2	37.4167	14.6356	2011-12-07 09:20:00	<	1.1
141.014	37.2417	20.4835	2011-12-08 08:00:00	<	0.99
141.047	37.2417	20.4295	2011-12-08 08:00:00	<	1.1
141.047	37.2417	20.4295	2011-12-08 08:00:00	<	1.1
141.026	37.3222	11.455	2011-12-08 08:25:00	<	0.99
141.106	37.2833	16.9577	2011-12-08 08:50:00	<	1.1
141.106	37.2833	16.9577	2011-12-08 08:50:00	<	1.1
141.014	37.2417	20.4835	2011-12-09 07:55:00	<	1.1
141.026	37.3222	11.455	2011-12-09 08:25:00	1	1.1
141.373	37.4167	29.9466	2011-12-10 06:54:00	0.0069
141.373	37.4167	29.9466	2011-12-10 07:05:00	0.0096
141.014	37.2417	20.4835	2011-12-10 07:35:00	1.2
141.026	37.3222	11.455	2011-12-10 08:00:00	1.4
141.2	37.5	16.8324	2011-12-10 09:45:00	0.11
141.076	37.4884	7.95409	2011-12-10 10:40:00	<	1
141.071	37.4229	3.19993	2011-12-10 11:00:00	<	1
141.127	37.4229	8.13122	2011-12-10 11:15:00	<	1
141.062	37.3161	12.3543	2011-12-10 11:45:00	<	1
141.047	37.2417	20.4295	2011-12-11 07:35:00	<	1
141.047	37.2417	20.4295	2011-12-11 07:35:00	<	1
141.014	37.2417	20.4835	2011-12-11 07:40:00	1.7	1
141.026	37.3222	11.455	2011-12-11 08:00:00	<	1
141.106	37.2833	16.9577	2011-12-11 08:00:00	<	1
141.106	37.2833	16.9577	2011-12-11 08:00:00	<	1
141.062	37.5528	14.4507	2011-12-11 09:20:00	<	1
141.062	37.5528	14.4507	2011-12-11 09:20:00	<	1
141.061	37.6	19.6377	2011-12-11 09:50:00	<	1
141.061	37.6	19.6377	2011-12-11 09:50:00	<	1
141.122	37.5306	14.0791	2011-12-11 10:20:00	<	1
141.122	37.5306	14.0791	2011-12-11 10:20:00	<	1
141.047	37.2417	20.4295	2011-12-12 08:10:00	<	1
141.047	37.2417	20.4295	2011-12-12 08:10:00	<	1
141.014	37.2417	20.4835	2011-12-12 08:15:00	1.1
141.106	37.2833	16.9577	2011-12-12 08:30:00	<	1
141.106	37.2833	16.9577	2011-12-12 08:30:00	<	1
141.026	37.3222	11.455	2011-12-12 08:40:00	1.1
141.122	37.5306	14.0791	2011-12-12 09:40:00	<	1
141.122	37.5306	14.0791	2011-12-12 09:40:00	<	1
141.062	37.5528	14.4507	2011-12-12 10:00:00	<	1
141.062	37.5528	14.4507	2011-12-12 10:00:00	<	1
141.061	37.6	19.6377	2011-12-12 10:15:00	<	1
141.061	37.6	19.6377	2011-12-12 10:15:00	<	1
141.014	37.2417	20.4835	2011-12-13 08:00:00	<	0.89
141.026	37.3222	11.455	2011-12-13 08:25:00	1.3	0.89
141.047	37.2417	20.4295	2011-12-14 07:45:00	<	1
141.047	37.2417	20.4295	2011-12-14 07:45:00	<	1
141.014	37.2417	20.4835	2011-12-14 07:55:00	1.2
141.122	37.5306	14.0791	2011-12-14 08:05:00	<	1
141.122	37.5306	14.0791	2011-12-14 08:05:00	<	1
141.106	37.2833	16.9577	2011-12-14 08:05:00	<	1
141.106	37.2833	16.9577	2011-12-14 08:05:00	<	1
141.026	37.3222	11.455	2011-12-14 08:20:00	1.3
141.2	37.2333	25.8507	2011-12-14 08:35:00	0.029
141.2	37.5833	22.9055	2011-12-14 08:35:00	0.033
141.2	37.5833	22.9052	2011-12-14 08:35:00	<	1
141.2	37.5833	22.9052	2011-12-14 08:35:00	<	1
141.2	37.2333	25.851	2011-12-14 08:35:00	<	1
141.2	37.2333	25.851	2011-12-14 08:35:00	<	1
141.2	37.5833	22.9052	2011-12-14 08:35:00	<	1.1
141.2	37.5833	22.9052	2011-12-14 08:35:00	<	1.1
141.2	37.2333	25.851	2011-12-14 08:35:00	<	1.1
141.2	37.2333	25.851	2011-12-14 08:35:00	<	1.1
141.2	37.5833	22.9052	2011-12-14 08:35:00	<	1
141.2	37.5833	22.9052	2011-12-14 08:35:00	<	1
141.2	37.5833	22.9052	2011-12-14 08:35:00	<	1.1
141.2	37.5833	22.9052	2011-12-14 08:35:00	<	1.1
141.2	37.2333	25.851	2011-12-14 08:35:00	<	1.1
141.2	37.2333	25.851	2011-12-14 08:35:00	<	1.1
141.2	37.2333	25.851	2011-12-14 08:35:00	<	1.1
141.2	37.2333	25.851	2011-12-14 08:35:00	<	1.1
141.2	37.5833	22.9052	2011-12-14 08:35:00	<	1
141.2	37.5833	22.9052	2011-12-14 08:35:00	<	1
141.2	37.2333	25.851	2011-12-14 08:35:00	<	1.1
141.2	37.2333	25.851	2011-12-14 08:35:00	<	1.1
141.2	37.5833	22.9052	2011-12-14 08:35:00	<	1
141.2	37.5833	22.9052	2011-12-14 08:35:00	<	1
141.061	37.6	19.6377	2011-12-14 09:40:00	<	1
141.061	37.6	19.6377	2011-12-14 09:40:00	<	1
141.062	37.5528	14.4507	2011-12-14 10:05:00	<	1
141.062	37.5528	14.4507	2011-12-14 10:05:00	<	1
141.014	37.2417	20.4835	2011-12-15 07:55:00	<	1
141.026	37.3222	11.455	2011-12-15 08:20:00	1	1
141.014	37.2417	20.4835	2011-12-16 07:55:00	<	1
141.026	37.3222	11.455	2011-12-16 08:20:00	<	1
141.106	37.2833	16.9577	2011-12-16 09:00:00	<	1
141.106	37.2833	16.9577	2011-12-16 09:00:00	<	1
141.014	37.2417	20.4835	2011-12-17 08:05:00	1.3	0.96
141.026	37.3222	11.455	2011-12-17 08:30:00	<	0.96
141.014	37.2417	20.4835	2011-12-18 08:05:00	1.1	1
141.026	37.3222	11.455	2011-12-18 08:25:00	<	1
141.014	37.2417	20.4835	2011-12-19 07:55:00	<	0.98
141.026	37.3222	11.455	2011-12-19 08:20:00	1.1	0.98
141.047	37.2417	20.4295	2011-12-20 07:40:00	<	1
141.047	37.2417	20.4295	2011-12-20 07:40:00	<	1
141.106	37.2833	16.9577	2011-12-20 08:10:00	<	1
141.106	37.2833	16.9577	2011-12-20 08:10:00	<	1
141.061	37.6	19.6377	2011-12-20 09:10:00	<	1
141.061	37.6	19.6377	2011-12-20 09:10:00	<	1
141.122	37.5306	14.0791	2011-12-20 09:15:00	<	1
141.122	37.5306	14.0791	2011-12-20 09:15:00	<	1
141.062	37.5528	14.4507	2011-12-20 09:40:00	<	1
141.062	37.5528	14.4507	2011-12-20 09:40:00	<	1
141.06	37.4218	2.2249	2011-12-20 11:32:00	<	1.1
141.2	37.4167	14.6356	2011-12-21 07:55:00	<	1
141.2	37.4167	14.6356	2011-12-21 07:55:00	<	1
141.014	37.2417	20.4835	2011-12-21 08:00:00	<	1
141.2	37.2333	25.851	2011-12-21 08:20:00	<	1
141.2	37.2333	25.851	2011-12-21 08:20:00	<	1
141.026	37.3222	11.455	2011-12-21 08:25:00	<	1
141.2	37.5	16.8324	2011-12-21 08:30:00	<	1
141.2	37.5	16.8324	2011-12-21 08:30:00	<	1
141.2	37.3333	17.8123	2011-12-21 08:55:00	<	1
141.2	37.3333	17.8123	2011-12-21 08:55:00	<	1
141.2	37.5833	22.9052	2011-12-21 09:00:00	<	1
141.2	37.5833	22.9052	2011-12-21 09:00:00	<	1
141.047	37.2417	20.4295	2011-12-22 07:45:00	<	1.1
141.047	37.2417	20.4295	2011-12-22 07:45:00	<	1.1
141.014	37.2417	20.4835	2011-12-22 08:00:00	<	1.1
141.106	37.2833	16.9577	2011-12-22 08:10:00	<	1.1
141.106	37.2833	16.9577	2011-12-22 08:10:00	<	1.1
141.026	37.3222	11.455	2011-12-22 08:30:00	<	1.1
141.122	37.5306	14.0791	2011-12-22 09:25:00	<	1.1
141.122	37.5306	14.0791	2011-12-22 09:25:00	<	1.1
141.062	37.5528	14.4507	2011-12-22 09:50:00	<	1.1
141.062	37.5528	14.4507	2011-12-22 09:50:00	<	1.1
141.061	37.6	19.6377	2011-12-22 10:05:00	<	1.1
141.061	37.6	19.6377	2011-12-22 10:05:00	<	1.1
141.014	37.2417	20.4835	2011-12-23 07:45:00	<	1.1
141.026	37.3222	11.455	2011-12-23 08:10:00	<	1.1
141.014	37.2417	20.4835	2011-12-24 07:45:00	1	0.99
141.026	37.3222	11.455	2011-12-24 08:10:00	<	0.99
141.122	37.5306	14.0791	2011-12-24 08:25:00	<	1.1
141.122	37.5306	14.0791	2011-12-24 08:25:00	<	1.1
141.061	37.6	19.6377	2011-12-24 08:45:00	2.2	1.1
141.061	37.6	19.6377	2011-12-24 08:45:00	<	1.1
141.062	37.5528	14.4507	2011-12-24 09:05:00	<	1.1
141.062	37.5528	14.4507	2011-12-24 09:05:00	<	1.1
141.106	37.2833	16.9577	2011-12-24 09:55:00	<	1.1
141.106	37.2833	16.9577	2011-12-24 09:55:00	<	1.1
141.047	37.2417	20.4295	2011-12-24 10:15:00	<	1.1
141.047	37.2417	20.4295	2011-12-24 10:15:00	<	1.1
141.2	37.3333	17.8123	2011-12-25 07:30:00	<	1.1
141.2	37.3333	17.8123	2011-12-25 07:30:00	<	1.1
141.014	37.2417	20.4835	2011-12-25 07:50:00	<	1.1
141.2	37.4167	14.6356	2011-12-25 08:05:00	<	1.1
141.2	37.4167	14.6356	2011-12-25 08:05:00	<	1.1
141.026	37.3222	11.455	2011-12-25 08:10:00	<	1.1
141.014	37.2417	20.4835	2011-12-26 08:00:00	<	1
141.026	37.3222	11.455	2011-12-26 08:25:00	<	1
141.014	37.2417	20.4835	2011-12-27 07:50:00	<	1.1
141.2	37.3333	17.8123	2011-12-27 08:00:00	<	1.1
141.2	37.3333	17.8123	2011-12-27 08:00:00	<	1.1
141.026	37.3222	11.455	2011-12-27 08:10:00	<	1.1
141.2	37.4167	14.6356	2011-12-27 08:25:00	<	1.1
141.2	37.4167	14.6356	2011-12-27 08:25:00	<	1.1
141.2	37.2333	25.851	2011-12-27 08:30:00	<	1.1
141.2	37.2333	25.851	2011-12-27 08:30:00	<	1.1
141.2	37.5	16.8324	2011-12-27 09:00:00	<	1.1
141.2	37.5	16.8324	2011-12-27 09:00:00	<	1.1
141.2	37.5833	22.9052	2011-12-27 09:25:00	<	1.1
141.2	37.5833	22.9052	2011-12-27 09:25:00	<	1.1
141.047	37.2417	20.4295	2011-12-28 07:35:00	<	1.1
141.047	37.2417	20.4295	2011-12-28 07:35:00	<	1.1
141.014	37.2417	20.4835	2011-12-28 07:55:00	<	1
141.106	37.2833	16.9577	2011-12-28 08:00:00	<	1.1
141.106	37.2833	16.9577	2011-12-28 08:00:00	<	1.1
141.026	37.3222	11.455	2011-12-28 08:15:00	1.2	1
141.122	37.5306	14.0791	2011-12-28 09:05:00	<	1.1
141.122	37.5306	14.0791	2011-12-28 09:05:00	<	1.1
141.062	37.5528	14.4507	2011-12-28 09:25:00	<	1.1
141.062	37.5528	14.4507	2011-12-28 09:25:00	<	1.1
141.061	37.6	19.6377	2011-12-28 09:45:00	<	1.1
141.061	37.6	19.6377	2011-12-28 09:45:00	<	1.1
141.014	37.2417	20.4835	2011-12-29 07:55:00	<	0.97
141.2	37.3333	17.8123	2011-12-29 08:10:00	<	1
141.2	37.3333	17.8123	2011-12-29 08:10:00	<	1
141.026	37.3222	11.455	2011-12-29 08:20:00	<	0.97
141.2	37.4167	14.6356	2011-12-29 08:40:00	<	1
141.2	37.4167	14.6356	2011-12-29 08:40:00	<	1
141.2	37.5	16.8324	2011-12-29 09:00:00	<	1
141.2	37.5	16.8324	2011-12-29 09:00:00	<	1
141.106	37.2833	16.9577	2011-12-30 07:30:00	<	1
141.106	37.2833	16.9577	2011-12-30 07:30:00	<	1
141.014	37.2417	20.4835	2011-12-30 07:35:00	0.98
141.026	37.3222	11.455	2011-12-30 07:55:00	1.1
141.122	37.5306	14.0791	2011-12-30 08:25:00	<	1
141.122	37.5306	14.0791	2011-12-30 08:25:00	<	1
141.061	37.6	19.6377	2011-12-30 08:55:00	<	1
141.061	37.6	19.6377	2011-12-30 08:55:00	<	1
141.062	37.5528	14.4507	2011-12-30 09:10:00	<	1
141.062	37.5528	14.4507	2011-12-30 09:10:00	<	1
141.047	37.2417	20.4295	2011-12-30 10:05:00	<	1
141.047	37.2417	20.4295	2011-12-30 10:05:00	<	1
141.2	37.3333	17.8123	2011-12-31 07:50:00	<	1.1
141.2	37.3333	17.8123	2011-12-31 07:50:00	<	1.1
141.014	37.2417	20.4835	2011-12-31 07:55:00	<	0.98
141.026	37.3222	11.455	2011-12-31 08:15:00	<	0.98
141.2	37.4167	14.6356	2011-12-31 08:20:00	<	1.1
141.2	37.4167	14.6356	2011-12-31 08:20:00	<	1.1
141.2	37.5	16.8324	2011-12-31 09:00:00	<	1.1
141.2	37.5	16.8324	2011-12-31 09:00:00	<	1.1
141.047	37.2417	20.4295	2012-01-01 06:55:00	<	1.1
141.047	37.2417	20.4295	2012-01-01 06:55:00	<	1.1
141.106	37.2833	16.9577	2012-01-01 07:20:00	<	1.1
141.106	37.2833	16.9577	2012-01-01 07:20:00	<	1.1
141.014	37.2417	20.4835	2012-01-01 08:00:00	1.3
141.122	37.5306	14.0791	2012-01-01 08:15:00	<	1.1
141.122	37.5306	14.0791	2012-01-01 08:15:00	<	1.1
141.026	37.3222	11.455	2012-01-01 08:20:00	1.4
141.061	37.6	19.6377	2012-01-01 08:40:00	<	1.1
141.061	37.6	19.6377	2012-01-01 08:40:00	<	1.1
141.062	37.5528	14.4507	2012-01-01 09:10:00	<	1.1
141.062	37.5528	14.4507	2012-01-01 09:10:00	<	1.1
141.014	37.2417	20.4835	2012-01-02 07:50:00	<	1.1
141.2	37.3333	17.8123	2012-01-02 07:50:00	<	1.1
141.2	37.3333	17.8123	2012-01-02 07:50:00	<	1.1
141.026	37.3222	11.455	2012-01-02 08:20:00	1.2	1.1
141.2	37.4167	14.6356	2012-01-02 08:40:00	<	1.1
141.2	37.4167	14.6356	2012-01-02 08:40:00	<	1.1
141.047	37.2417	20.4295	2012-01-03 07:35:00	<	1.1
141.047	37.2417	20.4295	2012-01-03 07:35:00	<	1.1
141.014	37.2417	20.4835	2012-01-03 07:50:00	1.2
141.106	37.2833	16.9577	2012-01-03 08:00:00	<	1.1
141.106	37.2833	16.9577	2012-01-03 08:00:00	<	1.1
141.026	37.3222	11.455	2012-01-03 08:10:00	1.7
141.122	37.5306	14.0791	2012-01-03 08:50:00	<	1.1
141.122	37.5306	14.0791	2012-01-03 08:50:00	<	1.1
141.062	37.5528	14.4507	2012-01-03 09:15:00	<	1.1
141.062	37.5528	14.4507	2012-01-03 09:15:00	<	1.1
141.061	37.6	19.6377	2012-01-03 09:30:00	<	1.1
141.061	37.6	19.6377	2012-01-03 09:30:00	<	1.1
141.2	37.3333	17.8123	2012-01-04 07:40:00	<	1.1
141.2	37.3333	17.8123	2012-01-04 07:40:00	<	1.1
141.014	37.2417	20.4835	2012-01-04 07:45:00	1.5
141.2	37.2333	25.851	2012-01-04 08:10:00	<	1.1
141.2	37.2333	25.851	2012-01-04 08:10:00	<	1.1
141.2	37.4167	14.6356	2012-01-04 08:30:00	<	1.1
141.2	37.4167	14.6356	2012-01-04 08:30:00	<	1.1
141.2	37.5	16.8324	2012-01-04 09:25:00	<	1.1
141.2	37.5	16.8324	2012-01-04 09:25:00	<	1.1
141.2	37.5833	22.9052	2012-01-04 10:00:00	<	1.1
141.2	37.5833	22.9052	2012-01-04 10:00:00	<	1.1
141.047	37.2417	20.4295	2012-01-05 07:30:00	<	1.1
141.047	37.2417	20.4295	2012-01-05 07:30:00	<	1.1
141.014	37.2417	20.4835	2012-01-05 07:40:00	1.4
141.106	37.2833	16.9577	2012-01-05 08:00:00	<	1.1
141.106	37.2833	16.9577	2012-01-05 08:00:00	<	1.1
141.122	37.5306	14.0791	2012-01-05 09:10:00	<	1.1
141.122	37.5306	14.0791	2012-01-05 09:10:00	<	1.1
141.061	37.6	19.6377	2012-01-05 09:30:00	<	1.1
141.061	37.6	19.6377	2012-01-05 09:30:00	<	1.1
141.062	37.5528	14.4507	2012-01-05 10:00:00	<	1.1
141.062	37.5528	14.4507	2012-01-05 10:00:00	<	1.1
141.014	37.2417	20.4835	2012-01-06 08:05:00	1.7
141.2	37.3333	17.8123	2012-01-06 08:35:00	<	1.2
141.2	37.3333	17.8123	2012-01-06 08:35:00	<	1.2
141.2	37.4167	14.6356	2012-01-06 09:00:00	<	1.2
141.2	37.4167	14.6356	2012-01-06 09:00:00	<	1.2
141.2	37.5	16.8324	2012-01-06 09:30:00	<	1.2
141.2	37.5	16.8324	2012-01-06 09:30:00	<	1.2
141.047	37.2417	20.4295	2012-01-07 07:20:00	<	1.1
141.047	37.2417	20.4295	2012-01-07 07:20:00	<	1.1
141.106	37.2833	16.9577	2012-01-07 07:40:00	<	1.1
141.106	37.2833	16.9577	2012-01-07 07:40:00	<	1.1
141.014	37.2417	20.4835	2012-01-07 08:00:00	<	1.1
141.026	37.3222	11.455	2012-01-07 08:25:00	<	1.1
141.062	37.5528	14.4507	2012-01-07 09:20:00	<	1.1
141.062	37.5528	14.4507	2012-01-07 09:20:00	<	1.1
141.061	37.6	19.6377	2012-01-07 11:15:00	<	1.1
141.061	37.6	19.6377	2012-01-07 11:15:00	<	1.1
141.122	37.5306	14.0791	2012-01-07 12:35:00	<	1.1
141.122	37.5306	14.0791	2012-01-07 12:35:00	<	1.1
141.014	37.2417	20.4835	2012-01-08 07:45:00	1.7
141.026	37.3222	11.455	2012-01-08 08:05:00	1.6
141.2	37.3333	17.8123	2012-01-08 08:05:00	<	1.1
141.2	37.3333	17.8123	2012-01-08 08:05:00	<	1.1
141.2	37.4167	14.6356	2012-01-08 08:40:00	<	1.1
141.2	37.4167	14.6356	2012-01-08 08:40:00	<	1.1
141.2	37.5	16.8324	2012-01-08 09:15:00	1.1	1.1
141.2	37.5	16.8324	2012-01-08 09:15:00	<	1.1
141.047	37.2417	20.4295	2012-01-09 07:50:00	<	1.1
141.047	37.2417	20.4295	2012-01-09 07:50:00	<	1.1
141.014	37.2417	20.4835	2012-01-09 08:00:00	1.1
141.106	37.2833	16.9577	2012-01-09 08:10:00	<	1.1
141.106	37.2833	16.9577	2012-01-09 08:10:00	<	1.1
141.026	37.3222	11.455	2012-01-09 08:20:00	1.8
141.122	37.5306	14.0791	2012-01-09 09:10:00	<	1.1
141.122	37.5306	14.0791	2012-01-09 09:10:00	<	1.1
141.061	37.6	19.6377	2012-01-09 09:35:00	<	1.1
141.061	37.6	19.6377	2012-01-09 09:35:00	<	1.1
141.062	37.5528	14.4507	2012-01-09 09:50:00	<	1.1
141.062	37.5528	14.4507	2012-01-09 09:50:00	<	1.1
141.014	37.2417	20.4835	2012-01-10 08:00:00	<	1
141.2	37.3333	17.8123	2012-01-10 08:00:00	<	1.1
141.2	37.3333	17.8123	2012-01-10 08:00:00	<	1.1
141.026	37.3222	11.455	2012-01-10 08:20:00	<	1
141.2	37.4167	14.6356	2012-01-10 09:25:00	<	1.1
141.2	37.4167	14.6356	2012-01-10 09:25:00	<	1.1
141.2	37.5	16.8324	2012-01-10 09:55:00	<	1.1
141.2	37.5	16.8324	2012-01-10 09:55:00	<	1.1
141.047	37.2417	20.4295	2012-01-11 08:00:00	<	1.1
141.047	37.2417	20.4295	2012-01-11 08:00:00	<	1.1
141.014	37.2417	20.4835	2012-01-11 08:10:00	<	1
141.026	37.3222	11.455	2012-01-11 08:35:00	1.3	1
141.014	37.2417	20.4835	2012-01-12 08:00:00	<	1
141.026	37.3222	11.455	2012-01-12 08:25:00	1.1	1
141.014	37.2417	20.4835	2012-01-13 08:10:00	<	0.97
141.026	37.3222	11.455	2012-01-13 08:35:00	1.3	0.97
141.122	37.5306	14.0791	2012-01-13 08:40:00	<	1.1
141.122	37.5306	14.0791	2012-01-13 08:40:00	<	1.1
141.2	37.5833	22.9052	2012-01-13 09:45:00	<	1
141.2	37.5833	22.9052	2012-01-13 09:45:00	<	1
141.2	37.2333	25.851	2012-01-13 10:20:00	<	1
141.2	37.2333	25.851	2012-01-13 10:20:00	<	1
141.061	37.6	19.6377	2012-01-13 10:30:00	<	1.1
141.061	37.6	19.6377	2012-01-13 10:30:00	<	1.1
141.062	37.5528	14.4507	2012-01-13 10:40:00	<	1.1
141.062	37.5528	14.4507	2012-01-13 10:40:00	<	1.1
141.106	37.2833	16.9577	2012-01-13 10:55:00	<	1.1
141.106	37.2833	16.9577	2012-01-13 10:55:00	<	1.1
141.047	37.2417	20.4295	2012-01-13 11:20:00	<	1.1
141.047	37.2417	20.4295	2012-01-13 11:20:00	<	1.1
141.014	37.2417	20.4835	2012-01-14 07:45:00	<	0.98
141.026	37.3222	11.455	2012-01-14 08:05:00	1.5	0.98
141.2	37.3333	17.8123	2012-01-14 08:10:00	<	1
141.2	37.3333	17.8123	2012-01-14 08:10:00	<	1
141.014	37.2417	20.4835	2012-01-15 07:55:00	<	1
141.026	37.3222	11.455	2012-01-15 08:15:00	1.1	1
141.047	37.2417	20.4295	2012-01-15 08:15:00	<	1.1
141.047	37.2417	20.4295	2012-01-15 08:15:00	<	1.1
141.106	37.2833	16.9577	2012-01-15 08:40:00	<	1.1
141.106	37.2833	16.9577	2012-01-15 08:40:00	<	1.1
141.122	37.5306	14.0791	2012-01-15 09:55:00	<	1.1
141.122	37.5306	14.0791	2012-01-15 09:55:00	<	1.1
141.062	37.5528	14.4507	2012-01-15 10:15:00	<	1.1
141.062	37.5528	14.4507	2012-01-15 10:15:00	<	1.1
141.061	37.6	19.6377	2012-01-15 10:30:00	<	1.1
141.061	37.6	19.6377	2012-01-15 10:30:00	<	1.1
141.014	37.2417	20.4835	2012-01-16 07:50:00	<	1
141.2	37.3333	17.8123	2012-01-16 08:10:00	<	1
141.2	37.3333	17.8123	2012-01-16 08:10:00	<	1
141.026	37.3222	11.455	2012-01-16 08:15:00	<	1
141.2	37.4167	14.6356	2012-01-16 08:40:00	<	1
141.2	37.4167	14.6356	2012-01-16 08:40:00	<	1
141.2	37.5	16.8324	2012-01-16 09:00:00	<	1
141.2	37.5	16.8324	2012-01-16 09:00:00	<	1
141.047	37.2417	20.4295	2012-01-17 08:00:00	<	1
141.047	37.2417	20.4295	2012-01-17 08:00:00	<	1
141.014	37.2417	20.4835	2012-01-17 08:10:00	1.1
141.106	37.2833	16.9577	2012-01-17 08:20:00	<	1
141.106	37.2833	16.9577	2012-01-17 08:20:00	<	1
141.026	37.3222	11.455	2012-01-17 08:30:00	1.1
141.2	37.2333	25.851	2012-01-17 08:50:00	<	1
141.2	37.2333	25.851	2012-01-17 08:50:00	<	1
141.122	37.5306	14.0791	2012-01-17 08:55:00	<	1
141.122	37.5306	14.0791	2012-01-17 08:55:00	<	1
141.2	37.5833	22.9052	2012-01-17 09:20:00	<	1
141.2	37.5833	22.9052	2012-01-17 09:20:00	<	1
141.061	37.6	19.6377	2012-01-17 10:35:00	<	1
141.061	37.6	19.6377	2012-01-17 10:35:00	<	1
141.062	37.5528	14.4507	2012-01-17 10:50:00	<	1
141.062	37.5528	14.4507	2012-01-17 10:50:00	<	1
141.014	37.2417	20.4835	2012-01-18 08:15:00	<	1
141.026	37.3222	11.455	2012-01-18 08:40:00	1	1
141.2	37.3333	17.8123	2012-01-18 08:50:00	<	0.98
141.2	37.3333	17.8123	2012-01-18 08:50:00	<	0.98
141.2	37.4167	14.6356	2012-01-18 09:20:00	<	0.98
141.2	37.4167	14.6356	2012-01-18 09:20:00	<	0.98
141.2	37.5	16.8324	2012-01-18 09:50:00	<	0.98
141.2	37.5	16.8324	2012-01-18 09:50:00	<	0.98
141.014	37.2417	20.4835	2012-01-19 07:55:00	1.3
141.026	37.3222	11.455	2012-01-19 08:20:00	1.7
141.014	37.2417	20.4835	2012-01-20 08:15:00	1.4
141.014	37.2417	20.4835	2012-01-21 07:50:00	1.6
141.026	37.3222	11.455	2012-01-21 08:00:00	2.8
141.014	37.2417	20.4835	2012-01-22 08:00:00	<	0.95
141.014	37.2417	20.4835	2012-01-23 08:10:00	1.6	1.1
141.014	37.2417	20.4835	2012-01-24 08:05:00	1.6
141.014	37.2417	20.4835	2012-01-25 08:00:00	<	1.1
141.026	37.3222	11.455	2012-01-25 08:20:00	1.7	1.1
141.062	37.5528	14.4507	2012-01-25 08:20:00	<	1.1
141.062	37.5528	14.4507	2012-01-25 08:20:00	<	1.1
141.047	37.2417	20.4295	2012-01-25 08:30:00	<	1.1
141.047	37.2417	20.4295	2012-01-25 08:30:00	<	1.1
141.122	37.5306	14.0791	2012-01-25 08:55:00	<	1.1
141.122	37.5306	14.0791	2012-01-25 08:55:00	<	1.1
141.106	37.2833	16.9577	2012-01-25 08:55:00	<	1.1
141.106	37.2833	16.9577	2012-01-25 08:55:00	<	1.1
141.014	37.2417	20.4835	2012-01-26 08:00:00	1.6
141.026	37.3222	11.455	2012-01-26 08:20:00	1.2
141.047	37.2417	20.4295	2012-01-27 07:50:00	<	1.1
141.047	37.2417	20.4295	2012-01-27 07:50:00	<	1.1
141.014	37.2417	20.4835	2012-01-27 08:00:00	1.2
141.106	37.2833	16.9577	2012-01-27 08:15:00	<	1.1
141.106	37.2833	16.9577	2012-01-27 08:15:00	<	1.1
141.026	37.3222	11.455	2012-01-27 08:20:00	1.2
141.2	37.2333	25.851	2012-01-27 08:35:00	<	1.1
141.2	37.2333	25.851	2012-01-27 08:35:00	<	1.1
141.122	37.5306	14.0791	2012-01-27 09:35:00	<	1.1
141.122	37.5306	14.0791	2012-01-27 09:35:00	<	1.1
141.062	37.5528	14.4507	2012-01-27 09:55:00	<	1.1
141.062	37.5528	14.4507	2012-01-27 09:55:00	<	1.1
141.061	37.6	19.6377	2012-01-27 10:10:00	<	1.1
141.061	37.6	19.6377	2012-01-27 10:10:00	<	1.1
141.014	37.2417	20.4835	2012-01-28 07:40:00	1.1
141.026	37.3222	11.455	2012-01-28 08:00:00	1.1
141.047	37.2417	20.4295	2012-01-29 07:30:00	<	1.1
141.047	37.2417	20.4295	2012-01-29 07:30:00	<	1.1
141.106	37.2833	16.9577	2012-01-29 07:50:00	<	1.1
141.106	37.2833	16.9577	2012-01-29 07:50:00	<	1.1
141.014	37.2417	20.4835	2012-01-29 08:00:00	<	0.99
141.122	37.5306	14.0791	2012-01-29 08:50:00	<	1.1
141.122	37.5306	14.0791	2012-01-29 08:50:00	<	1.1
141.062	37.5528	14.4507	2012-01-29 09:00:00	<	1.1
141.062	37.5528	14.4507	2012-01-29 09:00:00	<	1.1
141.061	37.6	19.6377	2012-01-29 09:30:00	<	1.1
141.061	37.6	19.6377	2012-01-29 09:30:00	<	1.1
141.014	37.2417	20.4835	2012-01-30 08:10:00	1.6
141.014	37.2417	20.4835	2012-01-31 08:05:00	1.1
141.047	37.2417	20.4295	2012-01-31 09:00:00	0.96	1.1
141.047	37.2417	20.4295	2012-01-31 09:00:00	<	1.1
141.106	37.2833	16.9577	2012-01-31 09:20:00	<	1.1
141.106	37.2833	16.9577	2012-01-31 09:20:00	<	1.1
141.122	37.5306	14.0791	2012-01-31 10:15:00	<	1.1
141.122	37.5306	14.0791	2012-01-31 10:15:00	<	1.1
141.062	37.5528	14.4507	2012-01-31 10:35:00	<	1.1
141.062	37.5528	14.4507	2012-01-31 10:35:00	<	1.1
141.061	37.6	19.6377	2012-01-31 10:50:00	<	1.1
141.061	37.6	19.6377	2012-01-31 10:50:00	<	1.1
141.2	37.5833	22.9052	2012-01-31 11:15:00	<	1.1
141.2	37.5833	22.9052	2012-01-31 11:15:00	<	1.1
141.2	37.5	16.8324	2012-01-31 11:40:00	<	1.1
141.2	37.5	16.8324	2012-01-31 11:40:00	<	1.1
141.014	37.2417	20.4835	2012-02-01 08:00:00	1.4
141.2	37.2333	25.851	2012-02-01 08:40:00	<	1
141.2	37.2333	25.851	2012-02-01 08:40:00	<	1
141.2	37.3333	17.8123	2012-02-01 08:50:00	<	1
141.2	37.3333	17.8123	2012-02-01 08:50:00	<	1
141.2	37.4167	14.6356	2012-02-01 09:25:00	<	1
141.2	37.4167	14.6356	2012-02-01 09:25:00	<	1
141.2	37.5	16.8324	2012-02-01 09:55:00	<	1
141.2	37.5	16.8324	2012-02-01 09:55:00	<	1
141.014	37.2417	20.4835	2012-02-02 08:00:00	<	1.1
141.026	37.3222	11.455	2012-02-02 08:20:00	1.6	1.1
141.014	37.2417	20.4835	2012-02-03 08:05:00	1.5
141.2	37.3333	17.8123	2012-02-03 08:15:00	<	0.95
141.2	37.3333	17.8123	2012-02-03 08:15:00	<	0.95
141.026	37.3222	11.455	2012-02-03 08:25:00	2.1
141.014	37.2417	20.4835	2012-02-04 08:05:00	<	1
141.047	37.2417	20.4295	2012-02-04 08:15:00	<	1.1
141.047	37.2417	20.4295	2012-02-04 08:15:00	<	1.1
141.026	37.3222	11.455	2012-02-04 08:25:00	1.3	1
141.106	37.2833	16.9577	2012-02-04 08:40:00	<	1.1
141.106	37.2833	16.9577	2012-02-04 08:40:00	<	1.1
141.122	37.5306	14.0791	2012-02-04 10:00:00	<	1.1
141.122	37.5306	14.0791	2012-02-04 10:00:00	<	1.1
141.014	37.2417	20.4835	2012-02-05 07:55:00	<	1.1
141.026	37.3222	11.455	2012-02-05 08:15:00	1.4	1.1
141.2	37.3333	17.8123	2012-02-05 08:20:00	<	1.1
141.2	37.3333	17.8123	2012-02-05 08:20:00	<	1.1
141.2	37.4167	14.6356	2012-02-05 09:00:00	<	1.1
141.2	37.4167	14.6356	2012-02-05 09:00:00	<	1.1
141.2	37.5	16.8324	2012-02-05 09:30:00	<	1.1
141.2	37.5	16.8324	2012-02-05 09:30:00	<	1.1
141.047	37.2417	20.4295	2012-02-06 08:00:00	<	1.1
141.047	37.2417	20.4295	2012-02-06 08:00:00	<	1.1
141.014	37.2417	20.4835	2012-02-06 08:05:00	<	1.1
141.026	37.3222	11.455	2012-02-06 08:25:00	1.7	1.1
141.106	37.2833	16.9577	2012-02-06 08:30:00	<	1.1
141.106	37.2833	16.9577	2012-02-06 08:30:00	<	1.1
141.122	37.5306	14.0791	2012-02-06 09:15:00	<	1.1
141.122	37.5306	14.0791	2012-02-06 09:15:00	<	1.1
141.062	37.5528	14.4507	2012-02-06 09:35:00	<	1.1
141.062	37.5528	14.4507	2012-02-06 09:35:00	<	1.1
141.061	37.6	19.6377	2012-02-06 10:15:00	<	1.1
141.061	37.6	19.6377	2012-02-06 10:15:00	<	1.1
141.014	37.2417	20.4835	2012-02-07 08:10:00	<	1.1
141.026	37.3222	11.455	2012-02-07 08:30:00	<	1.1
141.014	37.2417	20.4835	2012-02-08 08:10:00	<	0.98
141.026	37.3222	11.455	2012-02-08 08:30:00	1.4	0.98
141.014	37.2417	20.4835	2012-02-09 08:10:00	<	1.1
141.026	37.3222	11.455	2012-02-09 08:30:00	<	1.1
141.2	37.3333	17.8123	2012-02-09 09:10:00	<	1.1
141.2	37.3333	17.8123	2012-02-09 09:10:00	<	1.1
141.2	37.4167	14.6356	2012-02-09 09:35:00	<	1.1
141.2	37.4167	14.6356	2012-02-09 09:35:00	<	1.1
141.2	37.5	16.8324	2012-02-09 10:15:00	<	1.1
141.2	37.5	16.8324	2012-02-09 10:15:00	<	1.1
141.014	37.2417	20.4835	2012-02-10 08:00:00	<	1.1
141.2	37.2333	25.851	2012-02-10 08:15:00	<	1.1
141.2	37.2333	25.851	2012-02-10 08:15:00	<	1.1
141.026	37.3222	11.455	2012-02-10 08:20:00	1.3	1.1
141.106	37.2833	16.9577	2012-02-10 08:40:00	<	1.1
141.106	37.2833	16.9577	2012-02-10 08:40:00	<	1.1
141.122	37.5306	14.0791	2012-02-10 09:10:00	<	1.1
141.122	37.5306	14.0791	2012-02-10 09:10:00	<	1.1
141.047	37.2417	20.4295	2012-02-10 09:15:00	<	1.1
141.047	37.2417	20.4295	2012-02-10 09:15:00	<	1.1
141.2	37.5833	22.9052	2012-02-10 09:25:00	<	1.1
141.2	37.5833	22.9052	2012-02-10 09:25:00	<	1.1
141.061	37.6	19.6377	2012-02-10 09:55:00	<	1.1
141.061	37.6	19.6377	2012-02-10 09:55:00	<	1.1
141.062	37.5528	14.4507	2012-02-10 10:20:00	<	1.1
141.062	37.5528	14.4507	2012-02-10 10:20:00	<	1.1
141.014	37.2417	20.4835	2012-02-11 08:00:00	<	1.1
141.026	37.3222	11.455	2012-02-11 08:25:00	<	1.1
141.2	37.3333	17.8123	2012-02-11 08:35:00	<	1.1
141.2	37.3333	17.8123	2012-02-11 08:35:00	<	1.1
141.2	37.4167	14.6356	2012-02-11 09:15:00	<	1.1
141.2	37.4167	14.6356	2012-02-11 09:15:00	<	1.1
141.2	37.5	16.8324	2012-02-11 09:40:00	<	1.1
141.2	37.5	16.8324	2012-02-11 09:40:00	<	1.1
141.014	37.2417	20.4835	2012-02-12 07:50:00	<	1
141.047	37.2417	20.4295	2012-02-12 07:50:00	<	1.1
141.047	37.2417	20.4295	2012-02-12 07:50:00	<	1.1
141.026	37.3222	11.455	2012-02-12 08:10:00	<	1
141.106	37.2833	16.9577	2012-02-12 08:10:00	<	1.1
141.106	37.2833	16.9577	2012-02-12 08:10:00	<	1.1
141.122	37.5306	14.0791	2012-02-12 09:10:00	<	1.1
141.122	37.5306	14.0791	2012-02-12 09:10:00	<	1.1
141.061	37.6	19.6377	2012-02-12 09:35:00	<	1.1
141.061	37.6	19.6377	2012-02-12 09:35:00	<	1.1
141.062	37.5528	14.4507	2012-02-12 09:50:00	<	1.1
141.062	37.5528	14.4507	2012-02-12 09:50:00	<	1.1
141.014	37.2417	20.4835	2012-02-13 08:05:00	<	1
141.2	37.3333	17.8123	2012-02-13 08:15:00	<	1.1
141.2	37.3333	17.8123	2012-02-13 08:15:00	<	1.1
141.026	37.3222	11.455	2012-02-13 08:30:00	1.5	1
141.2	37.4167	14.6356	2012-02-13 08:50:00	<	1.1
141.2	37.4167	14.6356	2012-02-13 08:50:00	<	1.1
141.2	37.5	16.8324	2012-02-13 09:30:00	<	1.1
141.2	37.5	16.8324	2012-02-13 09:30:00	<	1.1
141.373	37.4167	29.9466	2012-02-13 10:02:00	0.016
141.373	37.4167	29.9466	2012-02-13 10:17:00	0.01
141.014	37.2417	20.4835	2012-02-14 08:05:00	<	1
141.047	37.2417	20.4295	2012-02-14 08:20:00	<	1.1
141.047	37.2417	20.4295	2012-02-14 08:20:00	<	1.1
141.026	37.3222	11.455	2012-02-14 08:30:00	<	1
141.106	37.2833	16.9577	2012-02-14 08:45:00	<	1.1
141.106	37.2833	16.9577	2012-02-14 08:45:00	<	1.1
141.122	37.5306	14.0791	2012-02-14 09:50:00	<	1.1
141.122	37.5306	14.0791	2012-02-14 09:50:00	<	1.1
141.062	37.5528	14.4507	2012-02-14 10:10:00	<	1.1
141.062	37.5528	14.4507	2012-02-14 10:10:00	<	1.1
141.061	37.6	19.6377	2012-02-14 10:25:00	<	1.1
141.061	37.6	19.6377	2012-02-14 10:25:00	<	1.1
141.014	37.2417	20.4835	2012-02-15 08:10:00	<	1.1
141.2	37.2333	25.851	2012-02-15 08:20:00	<	1.1
141.2	37.2333	25.851	2012-02-15 08:20:00	<	1.1
141.026	37.3222	11.455	2012-02-15 08:35:00	<	1.1
141.2	37.3333	17.8123	2012-02-15 09:05:00	<	1.1
141.2	37.3333	17.8123	2012-02-15 09:05:00	<	1.1
141.2	37.4167	14.6356	2012-02-15 09:45:00	<	1.1
141.2	37.4167	14.6356	2012-02-15 09:45:00	<	1.1
141.2	37.5	16.8324	2012-02-15 10:15:00	<	1.1
141.2	37.5	16.8324	2012-02-15 10:15:00	<	1.1
141.014	37.2417	20.4835	2012-02-16 08:05:00	1.1	0.98
141.026	37.3222	11.455	2012-02-16 08:30:00	<	0.98
141.047	37.2417	20.4295	2012-02-16 08:40:00	<	1.1
141.047	37.2417	20.4295	2012-02-16 08:40:00	<	1.1
141.106	37.2833	16.9577	2012-02-16 09:05:00	<	1.1
141.106	37.2833	16.9577	2012-02-16 09:05:00	<	1.1
141.014	37.2417	20.4835	2012-02-17 08:10:00	<	1.1
141.026	37.3222	11.455	2012-02-17 08:40:00	<	1.1
141.014	37.2417	20.4835	2012-02-18 07:55:00	<	1.1
141.047	37.2417	20.4295	2012-02-18 08:00:00	<	1.1
141.047	37.2417	20.4295	2012-02-18 08:00:00	<	1.1
141.026	37.3222	11.455	2012-02-18 08:15:00	<	1.1
141.106	37.2833	16.9577	2012-02-18 08:20:00	<	1.1
141.106	37.2833	16.9577	2012-02-18 08:20:00	<	1.1
141.062	37.5528	14.4507	2012-02-18 09:45:00	<	1.1
141.062	37.5528	14.4507	2012-02-18 09:45:00	<	1.1
141.061	37.6	19.6377	2012-02-18 10:05:00	<	1.1
141.061	37.6	19.6377	2012-02-18 10:05:00	<	1.1
141.122	37.5306	14.0791	2012-02-18 10:25:00	<	1.1
141.122	37.5306	14.0791	2012-02-18 10:25:00	<	1.1
141.014	37.2417	20.4835	2012-02-19 08:00:00	<	0.96
141.2	37.3333	17.8123	2012-02-19 08:10:00	<	1.1
141.2	37.3333	17.8123	2012-02-19 08:10:00	<	1.1
141.026	37.3222	11.455	2012-02-19 08:20:00	<	0.96
141.2	37.4167	14.6356	2012-02-19 08:45:00	<	1.1
141.2	37.4167	14.6356	2012-02-19 08:45:00	<	1.1
141.2	37.5	16.8324	2012-02-19 09:05:00	<	1.1
141.2	37.5	16.8324	2012-02-19 09:05:00	<	1.1
141.2	37.5833	22.9052	2012-02-19 11:55:00	<	1.1
141.2	37.5833	22.9052	2012-02-19 11:55:00	<	1.1
141.047	37.2417	20.4295	2012-02-20 07:45:00	<	1.1
141.047	37.2417	20.4295	2012-02-20 07:45:00	<	1.1
141.014	37.2417	20.4835	2012-02-20 08:00:00	<	1.1
141.106	37.2833	16.9577	2012-02-20 08:10:00	<	1.1
141.106	37.2833	16.9577	2012-02-20 08:10:00	<	1.1
141.026	37.3222	11.455	2012-02-20 08:20:00	<	1.1
141.122	37.5306	14.0791	2012-02-20 09:25:00	<	1.1
141.122	37.5306	14.0791	2012-02-20 09:25:00	<	1.1
141.062	37.5528	14.4507	2012-02-20 09:45:00	<	1.1
141.062	37.5528	14.4507	2012-02-20 09:45:00	<	1.1
141.061	37.6	19.6377	2012-02-20 10:05:00	<	1.1
141.061	37.6	19.6377	2012-02-20 10:05:00	<	1.1
141.014	37.2417	20.4835	2012-02-21 08:05:00	<	1
141.2	37.3333	17.8123	2012-02-21 08:05:00	<	1.1
141.2	37.3333	17.8123	2012-02-21 08:05:00	<	1.1
141.026	37.3222	11.455	2012-02-21 08:30:00	<	1
141.2	37.4167	14.6356	2012-02-21 08:35:00	<	1.1
141.2	37.4167	14.6356	2012-02-21 08:35:00	<	1.1
141.2	37.5	16.8324	2012-02-21 09:05:00	<	1.1
141.2	37.5	16.8324	2012-02-21 09:05:00	<	1.1
141.014	37.2417	20.4835	2012-02-22 08:05:00	<	1
141.026	37.3222	11.455	2012-02-22 08:30:00	<	1
141.014	37.2417	20.4835	2012-02-23 08:05:00	1.6	1.1
141.026	37.3222	11.455	2012-02-23 08:30:00	<	1.1
141.373	37.4167	29.9466	2012-02-23 10:47:00	0.0094
141.014	37.2417	20.4835	2012-02-24 08:00:00	<	1
141.026	37.3222	11.455	2012-02-24 08:05:00	<	1
141.014	37.2417	20.4835	2012-02-25 08:00:00	1.1
141.014	37.2417	20.4835	2012-02-26 07:55:00	1.3
141.014	37.2417	20.4835	2012-02-27 08:00:00	<	1
141.047	37.2417	20.4295	2012-02-28 07:55:00	<	1.1
141.047	37.2417	20.4295	2012-02-28 07:55:00	<	1.1
141.047	37.2417	20.4295	2012-02-28 07:55:00	<	1
141.047	37.2417	20.4295	2012-02-28 07:55:00	<	1
141.014	37.2417	20.4835	2012-02-28 08:00:00	<	1
141.106	37.2833	16.9577	2012-02-28 08:20:00	<	1.1
141.106	37.2833	16.9577	2012-02-28 08:20:00	<	1.1
141.106	37.2833	16.9577	2012-02-28 08:20:00	<	1
141.106	37.2833	16.9577	2012-02-28 08:20:00	<	1
141.026	37.3222	11.455	2012-02-28 08:20:00	<	1
141.2	37.2333	25.8507	2012-02-28 08:55:00	0.032
141.122	37.5306	14.0791	2012-02-28 10:00:00	<	1.1
141.122	37.5306	14.0791	2012-02-28 10:00:00	<	1.1
141.2	37.5	16.8324	2012-02-28 10:20:00	0.03
141.062	37.5528	14.4507	2012-02-28 10:25:00	<	1.1
141.062	37.5528	14.4507	2012-02-28 10:25:00	<	1.1
141.061	37.6	19.6377	2012-02-28 10:45:00	<	1.1
141.061	37.6	19.6377	2012-02-28 10:45:00	<	1.1
141.2	37.5833	22.9055	2012-02-28 10:55:00	0.034
141.014	37.2417	20.4835	2012-02-29 08:25:00	<	1.1
141.2	37.3333	17.8123	2012-02-29 10:30:00	<	1
141.2	37.3333	17.8123	2012-02-29 10:30:00	<	1
141.2	37.4167	14.6356	2012-02-29 11:00:00	<	1
141.2	37.4167	14.6356	2012-02-29 11:00:00	<	1
141.014	37.2417	20.4835	2012-03-01 08:05:00	1	0.97
141.026	37.3222	11.455	2012-03-01 08:30:00	<	0.97
141.014	37.2417	20.4835	2012-03-02 08:05:00	<	1.1
141.026	37.3222	11.455	2012-03-02 08:25:00	<	1.1
141.014	37.2417	20.4835	2012-03-03 07:55:00	1.6
141.014	37.2417	20.4835	2012-03-04 07:55:00	<	1
141.2	37.3333	17.8123	2012-03-04 08:15:00	<	1
141.2	37.3333	17.8123	2012-03-04 08:15:00	<	1
141.026	37.3222	11.455	2012-03-04 08:20:00	1	1
141.2	37.4167	14.6356	2012-03-04 08:50:00	<	1
141.2	37.4167	14.6356	2012-03-04 08:50:00	<	1
141.2	37.5833	22.9055	2012-03-04 10:10:00	0.026
141.014	37.2417	20.4835	2012-03-05 07:55:00	1.3	0.96
141.026	37.3222	11.455	2012-03-05 08:15:00	<	0.96
141.014	37.2417	20.4835	2012-03-06 08:00:00	<	1.1
141.026	37.3222	11.455	2012-03-06 08:20:00	<	1.1
141.014	37.2417	20.4835	2012-03-07 08:00:00	<	1.1
141.026	37.3222	11.455	2012-03-07 08:25:00	<	1.1
141.014	37.2417	20.4835	2012-03-08 08:00:00	<	0.98
141.026	37.3222	11.455	2012-03-08 08:25:00	<	0.98
141.014	37.2417	20.4835	2012-03-09 08:00:00	1.4	1
141.026	37.3222	11.455	2012-03-09 08:20:00	<	1
141.014	37.2417	20.4835	2012-03-10 08:10:00	<	1
141.026	37.3222	11.455	2012-03-10 08:30:00	<	1
141.014	37.2417	20.4835	2012-03-11 07:50:00	<	1
141.014	37.2417	20.4835	2012-03-12 08:00:00	<	1
141.014	37.2417	20.4835	2012-03-13 08:00:00	<	1.1
141.2	37.3333	17.8123	2012-03-14 07:45:00	<	1.1
141.2	37.3333	17.8123	2012-03-14 07:45:00	<	1.1
141.014	37.2417	20.4835	2012-03-14 08:00:00	<	1.1
141.2	37.4167	14.6356	2012-03-14 08:25:00	<	1.1
141.2	37.4167	14.6356	2012-03-14 08:25:00	<	1.1
141.014	37.2417	20.4835	2012-03-15 08:00:00	<	1.1
141.014	37.2417	20.4835	2012-03-16 08:00:00	<	1.1
141.2	37.4167	14.6356	2012-03-16 09:50:00	<	1.1
141.2	37.4167	14.6356	2012-03-16 09:50:00	<	1.1
141.2	37.3333	17.8123	2012-03-16 10:15:00	<	1.1
141.2	37.3333	17.8123	2012-03-16 10:15:00	<	1.1
141.047	37.2417	20.4295	2012-03-17 07:40:00	<	1.1
141.047	37.2417	20.4295	2012-03-17 07:40:00	<	1.1
141.014	37.2417	20.4835	2012-03-17 07:55:00	<	1.1
141.106	37.2833	16.9577	2012-03-17 08:00:00	<	1.1
141.106	37.2833	16.9577	2012-03-17 08:00:00	<	1.1
141.026	37.3222	11.455	2012-03-17 08:15:00	<	1.1
141.122	37.5306	14.0791	2012-03-17 09:10:00	<	1.1
141.122	37.5306	14.0791	2012-03-17 09:10:00	<	1.1
141.062	37.5528	14.4507	2012-03-17 09:25:00	<	1.1
141.062	37.5528	14.4507	2012-03-17 09:25:00	<	1.1
141.061	37.6	19.6377	2012-03-17 09:40:00	<	1.1
141.061	37.6	19.6377	2012-03-17 09:40:00	<	1.1
141.014	37.2417	20.4835	2012-03-18 08:05:00	<	0.97
141.026	37.3222	11.455	2012-03-18 08:25:00	<	0.97
141.014	37.2417	20.4835	2012-03-19 07:55:00	<	0.95
141.026	37.3222	11.455	2012-03-19 08:15:00	1.1	0.95
141.014	37.2417	20.4835	2012-03-20 07:55:00	<	1.1
141.026	37.3222	11.455	2012-03-20 08:15:00	<	1.1
141.2	37.3333	17.8123	2012-03-20 08:40:00	<	1.1
141.2	37.3333	17.8123	2012-03-20 08:40:00	<	1.1
141.2	37.4167	14.6356	2012-03-20 09:05:00	<	1.1
141.2	37.4167	14.6356	2012-03-20 09:05:00	<	1.1
141.047	37.2417	20.4295	2012-03-21 07:40:00	<	1
141.047	37.2417	20.4295	2012-03-21 07:40:00	<	1
141.106	37.2833	16.9577	2012-03-21 08:00:00	<	1
141.106	37.2833	16.9577	2012-03-21 08:00:00	<	1
141.014	37.2417	20.4835	2012-03-21 08:20:00	<	1
141.026	37.3222	11.455	2012-03-21 08:40:00	<	1
141.014	37.2417	20.4835	2012-03-22 08:05:00	2.1	1
141.026	37.3222	11.455	2012-03-22 08:30:00	<	1
141.2	37.3333	17.8123	2012-03-22 08:50:00	<	1
141.2	37.3333	17.8123	2012-03-22 08:50:00	<	1
141.2	37.4167	14.6356	2012-03-22 09:15:00	<	1
141.2	37.4167	14.6356	2012-03-22 09:15:00	<	1
141.014	37.2417	20.4835	2012-03-23 08:05:00	<	1
141.047	37.2417	20.4295	2012-03-23 08:10:00	<	1.1
141.047	37.2417	20.4295	2012-03-23 08:10:00	<	1.1
141.026	37.3222	11.455	2012-03-23 08:25:00	<	1
141.106	37.2833	16.9577	2012-03-23 08:25:00	<	1.1
141.106	37.2833	16.9577	2012-03-23 08:25:00	<	1.1
141.122	37.5306	14.0791	2012-03-23 09:10:00	<	1.1
141.122	37.5306	14.0791	2012-03-23 09:10:00	<	1.1
141.062	37.5528	14.4507	2012-03-23 09:30:00	<	1.1
141.062	37.5528	14.4507	2012-03-23 09:30:00	<	1.1
141.061	37.6	19.6377	2012-03-23 10:00:00	<	1.1
141.061	37.6	19.6377	2012-03-23 10:00:00	<	1.1
141.014	37.2417	20.4835	2012-03-24 08:00:00	<	0.97
141.026	37.3222	11.455	2012-03-24 08:25:00	<	0.97
141.047	37.2417	20.4295	2012-03-25 07:40:00	<	1
141.047	37.2417	20.4295	2012-03-25 07:40:00	<	1
141.014	37.2417	20.4835	2012-03-25 07:55:00	<	1
141.106	37.2833	16.9577	2012-03-25 08:00:00	<	1
141.106	37.2833	16.9577	2012-03-25 08:00:00	<	1
141.026	37.3222	11.455	2012-03-25 08:15:00	<	1
141.122	37.5306	14.0791	2012-03-25 09:05:00	<	1
141.122	37.5306	14.0791	2012-03-25 09:05:00	<	1
141.062	37.5528	14.4507	2012-03-25 09:20:00	<	1
141.062	37.5528	14.4507	2012-03-25 09:20:00	<	1
141.061	37.6	19.6377	2012-03-25 09:50:00	<	1
141.061	37.6	19.6377	2012-03-25 09:50:00	<	1
141.014	37.2417	20.4835	2012-03-26 07:55:00	<	0.98
141.2	37.4167	14.6356	2012-03-26 08:45:00	<	1.1
141.2	37.4167	14.6356	2012-03-26 08:45:00	<	1.1
141.2	37.3333	17.8123	2012-03-26 10:10:00	<	1.1
141.2	37.3333	17.8123	2012-03-26 10:10:00	<	1.1
141.014	37.2417	20.4835	2012-03-27 08:00:00	<	1.1
141.026	37.3222	11.455	2012-03-27 08:20:00	<	1.1
141.047	37.2417	20.4295	2012-03-27 08:20:00	<	1
141.047	37.2417	20.4295	2012-03-27 08:20:00	<	1
141.106	37.2833	16.9577	2012-03-27 08:40:00	<	1
141.106	37.2833	16.9577	2012-03-27 08:40:00	<	1
141.122	37.5306	14.0791	2012-03-27 09:55:00	<	1
141.122	37.5306	14.0791	2012-03-27 09:55:00	<	1
141.062	37.5528	14.4507	2012-03-27 10:10:00	<	1
141.062	37.5528	14.4507	2012-03-27 10:10:00	<	1
141.061	37.6	19.6377	2012-03-27 10:25:00	<	1
141.061	37.6	19.6377	2012-03-27 10:25:00	<	1
141.014	37.2417	20.4835	2012-03-28 07:55:00	<	1.6
141.026	37.3222	11.455	2012-03-28 08:15:00	<	1.6
141.2	37.3333	17.8123	2012-03-28 08:55:00	<	1
141.2	37.3333	17.8123	2012-03-28 08:55:00	<	1
141.2	37.4167	14.6356	2012-03-28 09:30:00	<	1
141.2	37.4167	14.6356	2012-03-28 09:30:00	<	1
141.014	37.2417	20.4835	2012-03-29 07:50:00	<	1.6
141.026	37.3222	11.455	2012-03-29 08:10:00	<	1.6
141.047	37.2417	20.4295	2012-03-29 08:20:00	<	1.1
141.047	37.2417	20.4295	2012-03-29 08:20:00	<	1.1
141.106	37.2833	16.9577	2012-03-29 08:40:00	<	1.1
141.106	37.2833	16.9577	2012-03-29 08:40:00	<	1.1
141.122	37.5306	14.0791	2012-03-29 09:55:00	<	1.1
141.122	37.5306	14.0791	2012-03-29 09:55:00	<	1.1
141.062	37.5528	14.4507	2012-03-29 10:20:00	<	1.1
141.062	37.5528	14.4507	2012-03-29 10:20:00	<	1.1
141.061	37.6	19.6377	2012-03-29 10:40:00	<	1.1
141.061	37.6	19.6377	2012-03-29 10:40:00	<	1.1
141.014	37.2417	20.4835	2012-03-30 07:50:00	<	1.6
141.026	37.3222	11.455	2012-03-30 08:15:00	<	1.6
141.014	37.2417	20.4835	2012-03-31 07:50:00	<	1.6
141.026	37.3222	11.455	2012-03-31 08:10:00	<	1.6
141.014	37.2417	20.4835	2012-04-03 08:00:00	0.34	0.3
141.026	37.3222	11.455	2012-04-03 08:20:00	<	0.3
141.014	37.2417	20.4835	2012-04-10 07:55:00	0.6
141.026	37.3222	11.455	2012-04-10 08:15:00	0.44
141.014	37.2417	20.4835	2012-04-17 07:50:00	<	1
141.026	37.3222	11.455	2012-04-17 08:20:00	<	1
141.014	37.2417	20.4835	2012-04-24 07:50:00	0.46
141.026	37.3222	11.455	2012-04-24 08:20:00	0.83
141.014	37.2417	20.4835	2012-04-26 07:55:00	0.39	0.3
141.026	37.3222	11.455	2012-04-26 08:20:00	0.29	0.3
141.014	37.2417	20.4835	2012-05-03 07:55:00	0.45
141.026	37.3222	11.455	2012-05-03 08:15:00	0.66
141.014	37.2417	20.4835	2012-05-08 07:55:00	0.37
141.026	37.3222	11.455	2012-05-08 08:25:00	0.71
141.373	37.4167	29.9466	2012-05-24	0.0034
141.373	37.4167	29.9466	2012-05-24	0.006
141.372	37.4167	29.7993	2012-05-24	0.0067
141.073	37.3359	10.4684	2012-08-03 07:00:00	0.028
141.373	37.4167	29.9466	2012-08-06	0.0028
141.373	37.415	29.9529	2012-08-06	0.0031
141.37	37.4167	29.652	2012-08-06	0.008
141.072	37.5031	9.3148	2012-08-06 07:40:00	0.11
141.2	37.4203	14.6168	2012-08-07 08:15:00	0.0083
141.2	37.4203	14.6168	2012-08-17 08:30:00	0.0029
141.2	37.4203	14.6168	2012-08-17 08:30:00	0.0042
141.073	37.4195	3.43846	2012-08-17 09:20:00	0.0098
141.063	37.5558	14.7853	2012-08-17 10:15:00	0.0098
141.063	37.5558	14.7853	2012-08-17 10:15:00	0.031
141.051	37.2451	20.0693	2012-08-18 07:00:00	0.073
141.051	37.2451	20.0693	2012-08-18 07:00:00	0.079
141.202	37.2356	25.737	2012-08-20	0.0031
141.154	37.4123	10.6298	2012-08-20 05:45:00	0.0035
141.149	37.3502	13.1148	2012-08-20 06:28:00	0.0082
141.149	37.3502	13.1148	2012-08-20 06:35:00	0.0053
141.04	37.6468	24.7104	2012-08-21 06:30:00	0.027
[truncated: 2,619 more rows]

## Sheet: Sediment_2_30km
SELECT	Dist. FDNPP, Km	>= 2 Km AND <= 30 Km		Sediment, Bq/Kg
Long E, °dec	lat N, °dec	Dist. FDNPP, Km	Date Smpl	Cs-137	< DL
141.328	37.3867	26.186	2009-05-01	0.77
141.047	37.2417	20.2761	2011-04-29 08:30:00	1200
141.047	37.2417	20.2761	2011-04-29 08:30:00	1600
141.062	37.5528	14.5194	2011-04-29 10:17:00	1400
141.062	37.5528	14.5194	2011-04-29 10:17:00	2000
141.373	37.4167	29.8341	2011-05-10 12:20:00	85
141.373	37.4167	29.8341	2011-05-24 10:38:00	37
141.047	37.2417	20.2761	2011-06-02 07:40:00	1000
141.062	37.5528	14.5194	2011-06-02 09:40:00	600
141.373	37.4167	29.8341	2011-06-07 07:34:00	88
141.373	37.4167	29.8341	2011-06-21 07:40:00	20
141.047	37.2417	20.2761	2011-06-28 08:30:00	1800
141.062	37.5528	14.5194	2011-06-28 10:30:00	120
141.373	37.4167	29.8341	2011-07-06 07:30:00	210
141.014	37.2417	20.3381	2011-07-14 07:55:00	490
141.026	37.3222	11.3264	2011-07-14 09:45:00	570
141.2	37.5833	22.8999	2011-07-17 08:40:00	51
141.062	37.5528	14.5194	2011-07-17 09:45:00	170
141.122	37.5306	14.1101	2011-07-17 10:35:00	290
141.047	37.2417	20.2761	2011-07-26 07:20:00	630
141.106	37.2833	16.8045	2011-07-26 08:05:00	870
141.2	37.5	16.8015	2011-07-26 09:45:00	85
141.061	37.6	19.6993	2011-07-26 10:55:00	87
141.372	37.4133	29.7001	2011-07-29 12:26:00	100
141.2	37.2333	25.6895	2011-08-06 07:30:00	60
141.2	37.4167	14.5486	2011-08-07 08:45:00	130
141.2	37.3333	17.6786	2011-08-07 09:25:00	170
141.062	37.5528	14.5194	2011-08-23 09:30:00	79
141.047	37.2417	20.2761	2011-08-23 11:00:00	510
141.106	37.2833	16.8045	2011-09-09 07:20:00	550
141.2	37.2333	25.6895	2011-09-09 08:05:00	13
141.373	37.4167	29.8341	2011-09-11 13:56:00	150
141.122	37.5306	14.1101	2011-09-13 08:50:00	39
141.118	37.6	20.879	2011-09-13 09:50:00	130
141.2	37.5833	22.8999	2011-09-14 08:45:00	24
141.014	37.2417	20.3381	2011-09-15 07:40:00	260
141.037	37.2	24.8799	2011-09-15 09:00:00	350
141.026	37.3222	11.3264	2011-09-15 10:45:00	220
141.047	37.2417	20.2761	2011-09-15 11:05:00	1000
141.2	37.3333	17.6786	2011-09-16 07:30:00	51
141.2	37.4167	14.5486	2011-09-25 08:45:00	210
141.2	37.5	16.8015	2011-09-25 09:45:00	42
141.048	37.6854	29.0759	2011-09-28 06:56:00	61
141.071	37.6854	29.2258	2011-09-28 07:21:00	33
141.014	37.2417	20.3381	2011-10-12 08:00:00	190
141.2	37.5833	22.8999	2011-10-13 11:50:00	19
141.118	37.6	20.879	2011-10-13 12:30:00	42
141.037	37.2	24.8799	2011-10-13 12:50:00	59
141.122	37.5306	14.1101	2011-10-13 13:15:00	45
141.2	37.2333	25.6895	2011-10-14 09:00:00	11
141.2	37.3333	17.6786	2011-10-14 09:30:00	140
141.2	37.4167	14.5486	2011-10-14 10:20:00	250
141.2	37.5	16.8015	2011-10-14 11:00:00	43
141.047	37.2417	20.2761	2011-10-17 09:10:00	910
141.106	37.2833	16.8045	2011-10-17 09:30:00	250
141.026	37.3222	11.3264	2011-10-17 12:10:00	170
141.2	37.5833	22.8999	2011-11-10 09:40:00	17
141.118	37.6	20.879	2011-11-10 10:20:00	34
141.037	37.2	24.8799	2011-11-10 10:50:00	41
141.122	37.5306	14.1101	2011-11-10 11:10:00	37
141.2	37.3333	17.6786	2011-11-11 08:00:00	98
141.2	37.4167	14.5486	2011-11-11 08:45:00	140
141.2	37.5	16.8015	2011-11-11 09:20:00	40
141.014	37.2417	20.3381	2011-11-14 08:00:00	160
141.2	37.2333	25.6895	2011-11-18 08:45:00	49
141.106	37.2833	16.8045	2011-11-18 12:50:00	520
141.047	37.2417	20.2761	2011-11-18 13:50:00	960
141.026	37.3222	11.3264	2011-11-25 10:30:00	160
141.2	37.5833	22.8999	2011-12-07 08:15:00	21
141.2	37.3333	17.6786	2011-12-10 08:10:00	72
141.2	37.4167	14.5486	2011-12-10 09:00:00	120
141.2	37.5	16.8015	2011-12-10 09:45:00	90
141.373	37.4167	29.8341	2011-12-10 10:36:00	170
141.122	37.5306	14.1101	2011-12-11 09:20:00	35
141.061	37.6	19.6993	2011-12-11 09:50:00	31
141.122	37.5306	14.1101	2011-12-11 10:20:00	27
141.2	37.2333	25.6895	2011-12-14 08:35:00	130
141.014	37.2417	20.3381	2011-12-15 09:50:00	570
141.026	37.3222	11.3264	2011-12-15 10:55:00	170
141.047	37.2417	20.2761	2011-12-16 08:00:00	200
141.106	37.2833	16.8045	2011-12-16 09:00:00	370
141.047	37.2417	20.2761	2012-01-05 07:30:00	2300
141.106	37.2833	16.8045	2012-01-07 07:40:00	550
141.122	37.5306	14.1101	2012-01-07 09:20:00	54
141.118	37.6	20.879	2012-01-07 11:15:00	32
141.2	37.3333	17.6786	2012-01-10 08:00:00	150
141.2	37.4167	14.5486	2012-01-10 09:25:00	28
141.2	37.5	16.8015	2012-01-10 09:55:00	17
141.122	37.5306	14.1101	2012-01-13 08:40:00	27
141.2	37.5833	22.8999	2012-01-17 09:20:00	17
141.014	37.2417	20.3381	2012-01-18 08:15:00	330
141.2	37.2333	25.6895	2012-01-18 11:15:00	270
141.026	37.3222	11.3264	2012-01-18 14:30:00	220
141.106	37.2833	16.8045	2012-02-04 08:40:00	1400
141.047	37.2417	20.2761	2012-02-06 08:00:00	200
141.122	37.5306	14.1101	2012-02-06 09:05:00	81
141.122	37.5306	14.1101	2012-02-06 09:30:00	70
141.118	37.6	20.879	2012-02-06 10:15:00	250
141.014	37.2417	20.3381	2012-02-13 08:05:00	200
141.372	37.4167	29.6871	2012-02-13 13:54:00	140
141.026	37.3222	11.3264	2012-02-13 14:30:00	280
141.2	37.2333	25.6895	2012-02-19 08:25:00	230
141.2	37.3333	17.6786	2012-02-19 09:45:00	56
141.2	37.4167	14.5486	2012-02-19 11:10:00	21
141.2	37.5833	22.8999	2012-02-19 12:15:00	18
141.2	37.5	16.8015	2012-02-19 12:40:00	38
141.014	37.2417	20.3381	2012-03-01 08:05:00	170
141.047	37.2417	20.2761	2012-03-04 08:00:00	330
141.106	37.2833	16.8045	2012-03-04 10:45:00	240
141.026	37.3222	11.3264	2012-03-21 12:20:00	210
141.122	37.5306	14.1101	2012-03-23 09:20:00	32
141.122	37.5306	14.1101	2012-03-23 09:40:00	500
141.118	37.6	20.879	2012-03-23 10:10:00	44
141.2	37.4167	14.5486	2012-03-26 08:45:00	34
141.2	37.2333	25.6895	2012-03-26 09:10:00	110
141.2	37.5	16.8015	2012-03-26 09:30:00	17
141.2	37.3333	17.6786	2012-03-28 08:55:00	220
141.2	37.5833	22.8999	2012-03-28 10:50:00	20
141.041	37.2672	17.417	2012-04-06 06:45:00	490
141.073	37.4195	3.36205	2012-04-06 08:30:00	130
141.045	37.4616	4.26294	2012-04-06 08:50:00	740
141.053	37.4612	4.43522	2012-04-06 09:20:00	100
141.075	37.5032	9.47525	2012-04-06 09:25:00	240
141.062	37.4609	4.72487	2012-04-06 09:40:00	140
141.053	37.5546	14.6099	2012-04-06 10:10:00	48
141.122	37.5306	14.1101	2012-04-06 10:10:00	63
141.065	37.5557	14.8733	2012-04-06 10:10:00	72
141.046	37.5549	14.5819	2012-04-06 10:50:00	87
141.047	37.2417	20.2761	2012-04-07 08:05:00	450
141.049	37.2456	19.8493	2012-04-07 08:05:00	660
141.075	37.3356	10.4066	2012-04-07 09:00:00	78
141.2	37.4167	14.5486	2012-04-07 10:00:00	25
141.201	37.4189	14.6461	2012-04-07 10:00:00	28
141.073	37.2685	17.5884	2012-04-10 06:55:00	54
141.044	37.3863	4.24772	2012-04-10 09:00:00	2300
141.052	37.3863	4.43996	2012-04-10 09:15:00	420
141.061	37.3859	4.78288	2012-04-10 09:45:00	370
141.094	37.3863	6.61563	2012-04-10 10:35:00	580
141.052	37.6414	24.2185	2012-04-17	15
141.033	37.6422	24.2575	2012-04-17	35
141.042	37.642	24.243	2012-04-17	110
141.014	37.2417	20.3381	2012-04-17 07:50:00	160
141.024	37.2474	19.6406	2012-04-17 07:50:00	170
141.026	37.3222	11.3264	2012-04-20 10:20:00	160
141.034	37.3263	10.843	2012-04-20 10:20:00	340
141.155	37.4102	10.6603	2012-04-21 10:30:00	24
141.028	37.2399	20.4591	2012-04-26 07:40:00	170
141.167	37.3854	12.3605	2012-04-26 08:20:00	24
141.2	37.3858	15.1394	2012-04-26 08:35:00	88
141.252	37.3867	19.5473	2012-04-26 09:00:00	170
141.041	37.2672	17.417	2012-05-01 05:00:00	1700
141.049	37.2456	19.8493	2012-05-01 07:05:00	390
141.072	37.4167	3.34766	2012-05-01 07:50:00	300
141.075	37.3356	10.4066	2012-05-01 08:05:00	200
141.075	37.5032	9.47525	2012-05-01 08:45:00	64
141.065	37.5557	14.8733	2012-05-01 09:30:00	96
141.149	37.3506	12.9215	2012-05-01 09:40:00	610
141.201	37.4189	14.6461	2012-05-01 10:50:00	50
141.073	37.5557	15.0089	2012-05-08 06:20:00	740
141.046	37.5883	18.2979	2012-05-08 06:45:00	38
141.062	37.4609	4.72487	2012-05-08 07:50:00	170
141.024	37.2474	19.6406	2012-05-08 07:55:00	200
141.053	37.4612	4.43522	2012-05-08 08:00:00	130
141.045	37.4616	4.26294	2012-05-08 08:15:00	210
141.053	37.5546	14.6099	2012-05-08 08:50:00	31
141.046	37.5549	14.5819	2012-05-08 09:00:00	90
141.034	37.3263	10.843	2012-05-08 11:25:00	290
141.155	37.4102	10.6603	2012-05-10 06:25:00	28
141.042	37.642	24.243	2012-05-17	31
141.033	37.6422	24.2575	2012-05-17	37
141.052	37.6414	24.2185	2012-05-17	200
141.044	37.3863	4.24772	2012-05-17 07:40:00	1500
141.052	37.3863	4.43996	2012-05-17 07:50:00	1200
141.061	37.3859	4.78288	2012-05-17 08:00:00	520
141.094	37.3863	6.61563	2012-05-17 08:10:00	490
141.234	37.5192	20.4458	2012-05-17 09:00:00	17
141.217	37.5367	20.3583	2012-05-17 09:25:00	15
141.149	37.3506	12.9215	2012-05-21 06:35:00	62
141.047	37.6448	24.5649	2012-05-21 07:20:00	32
141.2	37.235	25.5303	2012-05-21 08:40:00	200
141.375	37.4167	29.9811	2012-05-24	140
141.082	37.4605	5.76317	2012-05-24 07:00:00	73
141.085	37.432	4.44142	2012-05-24 07:25:00	190
141.028	37.2399	20.4591	2012-05-25 07:00:00	500
141.167	37.3854	12.3605	2012-05-25 08:00:00	19
141.2	37.3858	15.1394	2012-05-25 08:15:00	190
141.252	37.3867	19.5473	2012-05-25 08:45:00	150
141.049	37.3135	12.3228	2012-05-29 07:05:00	400
141.234	37.5192	20.4458	2012-05-30 08:15:00	38
141.217	37.5367	20.3583	2012-05-30 09:00:00	22
141.046	37.5883	18.2979	2012-06-05 05:49:00	21
141.073	37.5557	15.0089	2012-06-05 06:14:00	28
141.045	37.4616	4.26294	2012-06-05 07:45:00	190
141.053	37.4612	4.43522	2012-06-05 08:05:00	200
141.062	37.4609	4.72487	2012-06-05 08:15:00	180
141.046	37.5549	14.5819	2012-06-05 08:35:00	72
141.053	37.5546	14.6099	2012-06-05 08:50:00	53
141.065	37.5557	14.8733	2012-06-05 09:00:00	88
141.034	37.3263	10.843	2012-06-05 10:05:00	180
141.024	37.2474	19.6406	2012-06-05 11:40:00	260
141.075	37.3356	10.4066	2012-06-12 07:20:00	190
141.033	37.6422	24.2575	2012-06-14	17
141.042	37.642	24.243	2012-06-14	31
141.052	37.6414	24.2185	2012-06-14	180
141.155	37.4102	10.6603	2012-06-14 06:17:00	25
141.075	37.5032	9.47525	2012-06-14 08:15:00	27
141.217	37.5367	20.3583	2012-06-14 09:40:00	19
141.234	37.5192	20.4458	2012-06-14 10:20:00	45
141.041	37.2672	17.417	2012-06-15 06:30:00	70
141.094	37.3863	6.61563	2012-06-15 07:10:00	33
141.061	37.3859	4.78288	2012-06-15 07:30:00	62
141.052	37.3863	4.43996	2012-06-15 07:50:00	200
141.044	37.3863	4.24772	2012-06-15 08:10:00	710
141.149	37.3506	12.9215	2012-06-18 06:07:00	31
141.252	37.3867	19.5473	2012-06-19 07:30:00	100
141.2	37.3858	15.1394	2012-06-19 08:00:00	200
141.072	37.4167	3.34766	2012-06-19 08:10:00	83
141.167	37.3854	12.3605	2012-06-19 08:10:00	120
141.028	37.2399	20.4591	2012-06-19 09:40:00	280
141.201	37.4189	14.6461	2012-06-19 10:00:00	76
141.049	37.3135	12.3228	2012-06-24 06:35:00	260
141.049	37.2456	19.8493	2012-06-25 07:30:00	24
141.082	37.4605	5.76317	2012-06-26 06:30:00	46
141.085	37.432	4.44142	2012-06-26 06:55:00	37
141.046	37.5883	18.2979	2012-07-03 05:40:00	22
141.073	37.5557	15.0089	2012-07-03 06:02:00	44
141.024	37.2474	19.6406	2012-07-03 07:55:00	200
141.065	37.5557	14.8733	2012-07-03 08:55:00	150
141.034	37.3263	10.843	2012-07-03 10:10:00	180
141.155	37.4102	10.6603	2012-07-09 05:55:00	21
141.149	37.3506	12.9215	2012-07-09 07:10:00	57
141.033	37.6422	24.2575	2012-07-10	21
141.042	37.642	24.243	2012-07-10	61
141.052	37.6414	24.2185	2012-07-10	260
141.045	37.4616	4.26294	2012-07-10 08:10:00	55
141.053	37.4612	4.43522	2012-07-10 08:20:00	37
141.062	37.4609	4.72487	2012-07-10 08:35:00	29
141.075	37.5032	9.47525	2012-07-10 08:50:00	79
141.046	37.5549	14.5819	2012-07-10 09:30:00	89
141.053	37.5546	14.6099	2012-07-10 09:50:00	200
141.075	37.3356	10.4066	2012-07-11 07:50:00	66
141.049	37.3135	12.3228	2012-07-14 06:30:00	310
141.041	37.2672	17.417	2012-07-14 06:55:00	44
141.082	37.4605	5.76317	2012-07-17 06:10:00	31
141.085	37.432	4.44142	2012-07-17 06:35:00	130
141.072	37.4167	3.34766	2012-07-17 07:15:00	610
141.094	37.3863	6.61563	2012-07-18 07:00:00	28
141.201	37.4189	14.6461	2012-07-18 07:30:00	30
141.061	37.3859	4.78288	2012-07-18 08:00:00	2700
141.052	37.3863	4.43996	2012-07-18 08:30:00	120
141.044	37.3863	4.24772	2012-07-18 08:40:00	1200
141.2	37.235	25.5303	2012-07-20 07:00:00	230
141.076	37.3861	5.53038	2012-07-22 06:55:00	220
141.252	37.3867	19.5473	2012-07-26 07:30:00	150
141.2	37.3858	15.1394	2012-07-26 07:45:00	360
141.167	37.3854	12.3605	2012-07-26 08:00:00	44
141.028	37.2399	20.4591	2012-07-26 08:40:00	100
141.049	37.2456	19.8493	2012-07-26 09:15:00	84
141.047	37.6448	24.5649	2012-07-27 07:00:00	9.9
141.073	37.5557	15.0089	2012-07-31 06:10:00	48
141.046	37.5883	18.2979	2012-07-31 06:35:00	29
141.372	37.415	29.693	2012-08-06	240
141.075	37.5032	9.47525	2012-08-06 07:40:00	970
141.085	37.432	4.44142	2012-08-07 06:25:00	1300
141.082	37.4605	5.76317	2012-08-07 07:05:00	45
141.075	37.3356	10.4066	2012-08-07 07:15:00	150
141.024	37.2474	19.6406	2012-08-07 07:50:00	87
141.034	37.3263	10.843	2012-08-07 13:40:00	160
141.046	37.5549	14.5819	2012-08-08 07:50:00	1400
141.053	37.5546	14.6099	2012-08-08 08:10:00	49
141.062	37.4609	4.72487	2012-08-08 08:25:00	40
141.053	37.4612	4.43522	2012-08-08 08:40:00	32
141.045	37.4616	4.26294	2012-08-08 08:50:00	830
141.049	37.3135	12.3228	2012-08-10 06:55:00	180
141.041	37.2672	17.417	2012-08-10 07:37:00	200
141.072	37.4167	3.34766	2012-08-17 07:40:00	330
141.201	37.4189	14.6461	2012-08-17 10:00:00	460
141.094	37.3863	6.61563	2012-08-18 07:30:00	1800
141.061	37.3859	4.78288	2012-08-18 07:45:00	500
141.052	37.3863	4.43996	2012-08-18 08:00:00	180
141.044	37.3863	4.24772	2012-08-18 08:15:00	150
141.155	37.4102	10.6603	2012-08-20 05:55:00	50
141.149	37.3506	12.9215	2012-08-20 06:45:00	40
141.231	37.5825	24.6368	2012-08-21	11
141.042	37.642	24.243	2012-08-21	15
141.033	37.6422	24.2575	2012-08-21	16
141.134	37.5824	19.6265	2012-08-21	26
141.052	37.6414	24.2185	2012-08-21	67
141.362	37.4198	28.7983	2012-08-21	78
141.049	37.2456	19.8493	2012-08-22 08:30:00	490
141.065	37.5557	14.8733	2012-08-23 07:50:00	59
141.076	37.3861	5.53038	2012-08-24 06:25:00	310
141.252	37.3867	19.5473	2012-08-24 07:15:00	64
141.2	37.3858	15.1394	2012-08-24 07:35:00	110
141.167	37.3854	12.3605	2012-08-24 07:50:00	340
141.028	37.2399	20.4591	2012-08-24 08:40:00	38
141.217	37.5367	20.3583	2012-08-28 06:40:00	24
141.234	37.5192	20.4458	2012-08-28 07:25:00	70
141.073	37.5557	15.0089	2012-09-04 06:18:00	26
141.046	37.5883	18.2979	2012-09-04 06:45:00	47
141.024	37.2474	19.6406	2012-09-04 07:45:00	89
141.075	37.5032	9.47525	2012-09-04 08:10:00	57
141.075	37.3356	10.4066	2012-09-05 07:45:00	250
141.053	37.5546	14.6099	2012-09-06 08:10:00	120
141.046	37.5549	14.5819	2012-09-06 08:20:00	420
141.045	37.4616	4.26294	2012-09-06 08:30:00	1600
141.053	37.4612	4.43522	2012-09-06 08:35:00	92
141.062	37.4609	4.72487	2012-09-06 09:00:00	91
141.155	37.4102	10.6603	2012-09-10 05:58:00	22
141.149	37.3506	12.9215	2012-09-10 07:10:00	50
141.072	37.4167	3.34766	2012-09-10 08:25:00	60
141.052	37.6414	24.2185	2012-09-11	260
141.201	37.4189	14.6461	2012-09-11 07:10:00	320
141.094	37.3863	6.61563	2012-09-12 07:15:00	150
141.061	37.3859	4.78288	2012-09-12 07:35:00	180
141.052	37.3863	4.43996	2012-09-12 07:45:00	240
141.044	37.3863	4.24772	2012-09-12 08:00:00	170
141.049	37.3135	12.3228	2012-09-14 06:36:00	630
141.041	37.2672	17.417	2012-09-14 06:58:00	140
141.2	37.235	25.5303	2012-09-14 07:20:00	160
141.034	37.3263	10.843	2012-09-14 09:45:00	160
141.082	37.4605	5.76317	2012-09-18 05:30:00	32
141.085	37.432	4.44142	2012-09-18 06:45:00	580
141.042	37.642	24.243	2012-09-20	8.9
141.033	37.6422	24.2575	2012-09-20	43
141.049	37.2456	19.8493	2012-09-21 06:55:00	380
141.047	37.6448	24.5649	2012-09-26 06:50:00	6
141.024	37.2474	19.6406	2012-10-09 07:30:00	180
141.082	37.4605	5.76317	2012-10-12 07:00:00	320
141.085	37.432	4.44142	2012-10-12 07:35:00	500
141.076	37.3861	5.53038	2012-10-13 06:55:00	23
141.252	37.3867	19.5473	2012-10-13 08:25:00	36
141.2	37.3858	15.1394	2012-10-13 09:06:00	150
141.072	37.4167	3.34766	2012-10-13 09:15:00	83
141.167	37.3854	12.3605	2012-10-13 09:40:00	260
141.028	37.2399	20.4591	2012-10-13 10:38:00	640
141.041	37.2672	17.417	2012-10-14 06:40:00	1900
141.062	37.4609	4.72487	2012-10-14 08:35:00	32
141.201	37.4189	14.6461	2012-10-14 08:50:00	180
141.053	37.4612	4.43522	2012-10-14 09:10:00	22
141.045	37.4616	4.26294	2012-10-14 09:30:00	23
141.053	37.5546	14.6099	2012-10-14 10:00:00	120
141.046	37.5549	14.5819	2012-10-14 10:15:00	66
141.033	37.6422	24.2575	2012-10-16	3
141.042	37.642	24.243	2012-10-16	10
141.052	37.6414	24.2185	2012-10-16	19
141.065	37.5557	14.8733	2012-10-16 08:30:00	26
141.034	37.3263	10.843	2012-10-16 10:10:00	180
141.073	37.5557	15.0089	2012-10-17 06:25:00	34
141.046	37.5883	18.2979	2012-10-17 06:55:00	51
141.049	37.2456	19.8493	2012-10-17 10:35:00	320
141.155	37.4102	10.6603	2012-10-21 06:30:00	64
141.149	37.3506	12.9215	2012-10-21 07:25:00	510
141.094	37.3863	6.61563	2012-10-21 08:10:00	12
141.061	37.3859	4.78288	2012-10-21 08:30:00	75
141.052	37.3863	4.43996	2012-10-21 08:40:00	110
141.044	37.3863	4.24772	2012-10-21 08:55:00	300
141.075	37.5032	9.47525	2012-10-22 09:45:00	21
141.234	37.5192	20.4458	2012-10-25 07:05:00	16
141.217	37.5367	20.3583	2012-10-25 07:40:00	700
141.075	37.3356	10.4066	2012-10-26 10:10:00	200
141.072	37.4167	3.34766	2012-11-03 08:30:00	77
141.062	37.4609	4.72487	2012-11-03 08:40:00	23
141.053	37.4612	4.43522	2012-11-03 08:55:00	14
141.045	37.4616	4.26294	2012-11-03 09:05:00	19
141.046	37.5549	14.5819	2012-11-03 09:35:00	53
141.053	37.5546	14.6099	2012-11-03 09:45:00	250
141.2	37.3858	15.1394	2012-11-04 09:00:00	72
141.201	37.4189	14.6461	2012-11-04 09:30:00	370
141.155	37.4102	10.6603	2012-11-05 06:40:00	16
141.149	37.3506	12.9215	2012-11-05 07:35:00	300
141.094	37.3863	6.61563	2012-11-05 08:25:00	12
141.061	37.3859	4.78288	2012-11-05 08:45:00	260
141.052	37.3863	4.43996	2012-11-05 09:05:00	160
141.044	37.3863	4.24772	2012-11-05 09:15:00	250
141.2	37.235	25.5303	2012-11-06 06:45:00	150
141.073	37.5557	15.0089	2012-11-07 06:30:00	35
141.046	37.5883	18.2979	2012-11-07 06:50:00	9.5
141.015	37.2071	24.1555	2012-11-08 07:30:00	180
141.075	37.3356	10.4066	2012-11-08 07:50:00	49
141.076	37.3861	5.53038	2012-11-09 06:50:00	700
141.075	37.5032	9.47525	2012-11-09 08:40:00	19
141.065	37.5557	14.8733	2012-11-13 09:10:00	22
141.028	37.2399	20.4591	2012-11-14 07:50:00	450
141.167	37.3854	12.3605	2012-11-14 08:40:00	110
141.049	37.3135	12.3228	2012-11-14 13:05:00	440
141.041	37.2672	17.417	2012-11-14 13:30:00	85
141.052	37.6414	24.2185	2012-11-15	7.5
141.042	37.642	24.243	2012-11-15	9.7
141.033	37.6422	24.2575	2012-11-15	15
141.252	37.3867	19.5473	2012-11-15 08:30:00	110
141.049	37.2456	19.8493	2012-11-15 10:40:00	120
141.034	37.3263	10.843	2012-11-15 14:20:00	150
141.234	37.5192	20.4458	2012-11-16 06:40:00	150
141.217	37.5367	20.3583	2012-11-16 07:40:00	20
141.076	37.3861	5.53038	2012-11-18 06:50:00	35
141.082	37.4605	5.76317	2012-11-20 06:40:00	78
141.085	37.432	4.44142	2012-11-20 07:05:00	31
141.047	37.6448	24.5649	2012-11-22 06:45:00	2.4
141.217	37.5367	20.3583	2012-11-30 06:30:00	24
141.234	37.5192	20.4458	2012-11-30 07:40:00	120
141.015	37.2071	24.1555	2012-12-04 07:30:00	120
141.075	37.5032	9.47525	2012-12-05 09:28:00	22
141.072	37.4167	3.34766	2012-12-05 10:02:00	38
141.075	37.3356	10.4066	2012-12-07 08:29:00	60
141.201	37.4189	14.6461	2012-12-07 09:22:00	79
141.049	37.3135	12.3228	2012-12-08 06:55:00	600
141.041	37.2672	17.417	2012-12-08 07:20:00	6.6
141.052	37.6414	24.2185	2012-12-11	13
141.033	37.6422	24.2575	2012-12-11	47
141.042	37.642	24.243	2012-12-11	150
141.065	37.5557	14.8733	2012-12-11 09:14:00	12
141.082	37.4605	5.76317	2012-12-12 06:35:00	900
141.085	37.432	4.44142	2012-12-12 07:05:00	1000
141.049	37.2456	19.8493	2012-12-13 10:24:00	87
141.155	37.4102	10.6603	2012-12-14 06:25:00	15
141.149	37.3506	12.9215	2012-12-14 07:45:00	10
141.094	37.3863	6.61563	2012-12-14 08:46:00	14
141.061	37.3859	4.78288	2012-12-14 09:02:00	15
141.052	37.3863	4.43996	2012-12-14 09:31:00	41
141.044	37.3863	4.24772	2012-12-14 09:44:00	75
141.076	37.3861	5.53038	2012-12-16 07:10:00	110
141.046	37.5883	18.2979	2012-12-19 06:20:00	18
141.073	37.5557	15.0089	2012-12-19 06:50:00	18
141.062	37.4609	4.72487	2012-12-19 08:55:00	1500
141.045	37.4616	4.26294	2012-12-19 09:22:00	1400
141.053	37.4612	4.43522	2012-12-19 09:43:00	1500
141.053	37.5546	14.6099	2012-12-19 10:03:00	18
141.046	37.5549	14.5819	2012-12-19 10:27:00	29
141.034	37.3263	10.843	2012-12-20 15:30:00	250
141.234	37.5192	20.4458	2012-12-21 06:35:00	85
141.217	37.5367	20.3583	2012-12-21 07:12:00	31
141.252	37.3867	19.5473	2012-12-21 08:24:00	120
141.2	37.3858	15.1394	2012-12-21 08:44:00	150
141.167	37.3854	12.3605	2012-12-21 09:03:00	23
141.028	37.2399	20.4591	2012-12-21 09:46:00	230
141.075	37.5032	9.47525	2013-01-04 09:22:00	44
141.075	37.5032	9.47525	2013-01-04 09:22:00	53
141.072	37.4167	3.34766	2013-01-04 10:09:00	41
141.201	37.4189	14.6461	2013-01-05 07:59:00	260
141.075	37.3356	10.4066	2013-01-05 09:30:00	52
141.075	37.3356	10.4066	2013-01-05 09:30:00	73
141.053	37.5546	14.6099	2013-01-07 08:21:00	31
141.046	37.5549	14.5819	2013-01-07 08:39:00	29
141.062	37.4609	4.72487	2013-01-07 09:02:00	24
141.053	37.4612	4.43522	2013-01-07 09:32:00	49
141.045	37.4616	4.26294	2013-01-07 09:44:00	390
141.042	37.642	24.243	2013-01-08	8
141.052	37.6414	24.2185	2013-01-08	13
141.033	37.6422	24.2575	2013-01-08	78
141.015	37.2071	24.1555	2013-01-08 07:30:00	160
141.065	37.5557	14.8733	2013-01-08 09:53:00	49
141.034	37.3263	10.843	2013-01-08 10:30:00	170
141.049	37.2456	19.8493	2013-01-10 07:50:00	180
141.044	37.3863	4.24772	2013-01-11 08:25:00	66
141.052	37.3863	4.43996	2013-01-11 08:35:00	50
141.061	37.3859	4.78288	2013-01-11 08:53:00	500
141.094	37.3863	6.61563	2013-01-11 09:03:00	91
141.2	37.235	25.5303	2013-01-16 08:16:00	140
141.047	37.6448	24.5649	2013-01-17 08:15:00	12
141.373	37.415	29.84	2013-01-19	95
141.049	37.3135	12.3228	2013-01-19 06:32:00	410
141.041	37.2672	17.417	2013-01-19 06:56:00	160
141.252	37.3867	19.5473	2013-01-24 09:16:00	110
141.2	37.3858	15.1394	2013-01-24 09:39:00	86
141.167	37.3854	12.3605	2013-01-24 10:02:00	100
141.028	37.2399	20.4591	2013-01-24 10:46:00	25
141.082	37.4605	5.76317	2013-01-28 07:16:00	130
141.085	37.432	4.44142	2013-01-28 07:55:00	96
141.046	37.5883	18.2979	2013-01-30 05:47:00	18
141.073	37.5557	15.0089	2013-01-30 06:21:00	25
141.155	37.4102	10.6603	2013-02-04 06:18:00	20
141.234	37.5192	20.4458	2013-02-04 07:12:00	65
141.149	37.3506	12.9215	2013-02-04 07:26:00	37
141.217	37.5367	20.3583	2013-02-04 07:48:00	23
141.015	37.2071	24.1555	2013-02-05 07:30:00	170
141.034	37.3263	10.843	2013-02-05 10:30:00	160
141.073	37.5557	15.0089	2013-02-06 06:15:00	200
141.046	37.5883	18.2979	2013-02-06 06:45:00	21
141.076	37.3861	5.53038	2013-02-09 06:55:00	28
141.053	37.5546	14.6099	2013-02-10 09:19:00	9.4
141.046	37.5549	14.5819	2013-02-10 09:31:00	160
141.045	37.4616	4.26294	2013-02-10 09:54:00	85
141.053	37.4612	4.43522	2013-02-10 10:03:00	89
141.062	37.4609	4.72487	2013-02-10 10:10:00	17
141.065	37.5557	14.8733	2013-02-12 08:59:00	15
141.075	37.5032	9.47525	2013-02-12 09:21:00	29
141.073	37.4195	3.36205	2013-02-12 09:55:00	74
141.052	37.6414	24.2185	2013-02-14	3.7
141.134	37.5824	19.6265	2013-02-14	8.9
141.042	37.642	24.243	2013-02-14	23
141.033	37.6422	24.2575	2013-02-14	34
141.231	37.5825	24.6368	2013-02-14	37
141.362	37.4198	28.7983	2013-02-15	120
141.049	37.2456	19.8493	2013-02-15 07:36:00	120
141.075	37.3356	10.4066	2013-02-15 08:18:00	250
141.201	37.4189	14.6461	2013-02-15 09:13:00	79
141.155	37.4102	10.6603	2013-02-18 06:26:00	23
141.149	37.3506	12.9215	2013-02-18 07:45:00	53
141.044	37.3863	4.24772	2013-02-18 08:10:00	87
141.052	37.3863	4.43996	2013-02-18 08:23:00	70
141.061	37.3859	4.78288	2013-02-18 08:33:00	330
141.094	37.3863	6.61563	2013-02-18 08:46:00	23
141.085	37.432	4.44142	2013-02-19 07:17:00	35
141.082	37.4605	5.76317	2013-02-19 07:45:00	13
141.217	37.5367	20.3583	2013-02-21 06:34:00	16
141.252	37.3867	19.5473	2013-02-21 08:12:00	160
141.2	37.3858	15.1394	2013-02-21 08:41:00	160
141.167	37.3854	12.3605	2013-02-21 09:30:00	98
141.028	37.2399	20.4591	2013-02-21 10:18:00	335
141.076	37.3861	5.53038	2013-02-25 06:55:00	48
141.234	37.5192	20.4458	2013-02-26 08:48:00	30
141.049	37.3135	12.3228	2013-02-27 06:48:00	240
141.041	37.2672	17.417	2013-02-27 07:10:00	81
141.053	37.5546	14.6099	2013-03-04 09:10:00	290
141.046	37.5549	14.5819	2013-03-04 09:36:00	78
141.045	37.4616	4.26294	2013-03-04 09:48:00	65
141.053	37.4612	4.43522	2013-03-04 10:04:00	69
141.062	37.4609	4.72487	2013-03-04 10:18:00	38
141.047	37.6448	24.5649	2013-03-05 07:00:00	3.3
141.015	37.2071	24.1555	2013-03-05 07:30:00	140
141.034	37.3263	10.843	2013-03-05 10:20:00	120
141.052	37.6414	24.2185	2013-03-06	10
141.033	37.6422	24.2575	2013-03-06	56
141.042	37.642	24.243	2013-03-06	91
141.046	37.5883	18.2979	2013-03-07 06:05:00	29
141.073	37.5557	15.0089	2013-03-07 06:35:00	28
141.044	37.3863	4.24772	2013-03-07 08:11:00	38
141.052	37.3863	4.43996	2013-03-07 08:18:00	42
141.061	37.3859	4.78288	2013-03-07 08:26:00	160
141.094	37.3863	6.61563	2013-03-07 08:35:00	610
141.2	37.235	25.5303	2013-03-08 08:11:00	140
141.073	37.4195	3.36205	2013-03-12 08:09:00	44
141.075	37.5032	9.47525	2013-03-12 08:37:00	110
141.065	37.5557	14.8733	2013-03-12 09:07:00	66
141.201	37.4189	14.6461	2013-03-15 08:31:00	490
141.075	37.3356	10.4066	2013-03-15 09:17:00	92
141.049	37.2456	19.8493	2013-03-15 09:46:00	160
141.155	37.4102	10.6603	2013-03-16 05:14:00	10
141.149	37.3506	12.9215	2013-03-16 06:06:00	120
141.217	37.5367	20.3583	2013-03-22 05:57:00	20
141.234	37.5192	20.4458	2013-03-22 06:39:00	44
141.076	37.3861	5.53038	2013-03-25 06:50:00	120
141.082	37.4605	5.76317	2013-03-26 06:30:00	40
141.085	37.432	4.44142	2013-03-26 07:00:00	32
141.049	37.3135	12.3228	2013-03-28 06:22:00	270
141.041	37.2672	17.417	2013-03-28 06:45:00	19
141.252	37.3867	19.5473	2013-03-28 08:39:00	140
141.2	37.3858	15.1394	2013-03-28 09:01:00	110
141.167	37.3854	12.3605	2013-03-28 09:22:00	110
141.028	37.2399	20.4591	2013-03-28 10:11:00	26
141.015	37.2071	24.1555	2013-04-02 03:30:00	71
141.034	37.3263	10.843	2013-04-02 11:20:00	120
141.015	37.2071	24.1555	2013-04-02 15:30:00	71
141.065	37.5557	14.8733	2013-04-09 08:49:00	33
141.075	37.5032	9.47525	2013-04-09 09:04:00	79
141.073	37.4195	3.36205	2013-04-09 09:33:00	42
141.201	37.4189	14.6461	2013-04-10 08:07:00	120
141.075	37.3356	10.4066	2013-04-10 08:52:00	69
141.049	37.2456	19.8493	2013-04-10 09:21:00	110
141.073	37.5557	15.0089	2013-04-11 05:19:00	38
141.046	37.5883	18.2979	2013-04-11 05:43:00	14
141.046	37.5883	18.2979	2013-04-11 05:43:00	14
141.053	37.5546	14.6099	2013-04-11 09:14:00	34
141.046	37.5549	14.5819	2013-04-11 09:22:00	130
141.045	37.4616	4.26294	2013-04-11 09:44:00	180
141.053	37.4612	4.43522	2013-04-11 09:55:00	450
141.062	37.4609	4.72487	2013-04-11 10:29:00	27
141.094	37.3863	6.61563	2013-04-15 08:28:00	300
141.061	37.3859	4.78288	2013-04-15 08:44:00	190
141.052	37.3863	4.43996	2013-04-15 08:56:00	150
141.044	37.3863	4.24772	2013-04-15 09:09:00	310
141.155	37.4102	10.6603	2013-04-16 05:32:00	41
141.149	37.3506	12.9215	2013-04-16 06:23:00	170
141.252	37.3867	19.5473	2013-04-17 08:50:00	63
141.2	37.3858	15.1394	2013-04-17 09:13:00	100
141.167	37.3854	12.3605	2013-04-17 09:48:00	32
141.028	37.2399	20.4591	2013-04-17 10:35:00	200
141.049	37.3135	12.3228	2013-04-19 06:39:00	170
141.041	37.2672	17.417	2013-04-19 07:17:00	480
141.076	37.3861	5.53038	2013-04-22 06:33:00	81
141.042	37.642	24.243	2013-04-23	5.8
141.033	37.6422	24.2575	2013-04-23	15
141.052	37.6414	24.2185	2013-04-23	25
141.082	37.4605	5.76317	2013-04-23 05:45:00	16
141.082	37.4605	5.76317	2013-04-23 05:45:00	16
141.085	37.432	4.44142	2013-04-23 06:05:00	250
141.217	37.5367	20.3583	2013-04-24 05:38:00	10
141.217	37.5367	20.3583	2013-04-24 05:38:00	10
141.234	37.5192	20.4458	2013-04-24 06:06:00	84
141.015	37.2071	24.1555	2013-05-07 07:30:00	130
141.034	37.3263	10.843	2013-05-07 09:40:00	94
141.047	37.6448	24.5649	2013-05-08 06:20:00	10
141.047	37.6448	24.5649	2013-05-08 06:20:00	10
141.046	37.5883	18.2979	2013-05-09 05:35:00	15
141.046	37.5883	18.2979	2013-05-09 05:35:00	15
141.073	37.5557	15.0089	2013-05-09 06:02:00	38
141.073	37.5557	15.0089	2013-05-09 06:02:00	38
141.053	37.5546	14.6099	2013-05-13 09:03:00	14
141.053	37.5546	14.6099	2013-05-13 09:03:00	14
141.046	37.5549	14.5819	2013-05-13 09:12:00	35
141.045	37.4616	4.26294	2013-05-13 09:38:00	72
141.2	37.235	25.5303	2013-05-13 09:58:00	280
141.053	37.4612	4.43522	2013-05-13 10:00:00	17
141.053	37.4612	4.43522	2013-05-13 10:00:00	17
141.062	37.4609	4.72487	2013-05-13 10:13:00	29
141.052	37.6414	24.2185	2013-05-14	9.2
141.042	37.642	24.243	2013-05-14	67
141.033	37.6422	24.2575	2013-05-14	250
141.065	37.5557	14.8733	2013-05-14 09:08:00	1000
141.075	37.5032	9.47525	2013-05-14 09:27:00	44
141.073	37.4195	3.36205	2013-05-14 10:35:00	220
141.201	37.4189	14.6461	2013-05-15 08:03:00	190
141.075	37.3356	10.4066	2013-05-15 08:44:00	150
141.065	37.5557	14.8733	2013-05-15 09:08:00	1000
141.049	37.2456	19.8493	2013-05-15 09:14:00	350
141.094	37.3863	6.61563	2013-05-16 08:25:00	14
141.094	37.3863	6.61563	2013-05-16 08:25:00	14
141.061	37.3859	4.78288	2013-05-16 08:35:00	160
141.052	37.3863	4.43996	2013-05-16 08:43:00	130
141.044	37.3863	4.24772	2013-05-16 08:50:00	380
141.049	37.3135	12.3228	2013-05-17 05:54:00	23
141.041	37.2672	17.417	2013-05-17 06:15:00	19
141.085	37.432	4.44142	2013-05-20 06:00:00	45
141.082	37.4605	5.76317	2013-05-20 06:24:00	35
141.252	37.3867	19.5473	2013-05-20 08:05:00	76
141.2	37.3858	15.1394	2013-05-20 08:21:00	110
141.167	37.3854	12.3605	2013-05-20 08:50:00	130
141.028	37.2399	20.4591	2013-05-20 09:32:00	340
141.076	37.3861	5.53038	2013-05-23 06:33:00	77
141.155	37.4102	10.6603	2013-05-25 05:44:00	26
141.149	37.3506	12.9215	2013-05-25 06:31:00	81
141.373	37.415	29.84	2013-05-27	100
141.373	37.415	29.84	2013-05-27	100
141.217	37.5367	20.3583	2013-05-31 05:18:00	17
141.217	37.5367	20.3583	2013-05-31 05:18:00	17
141.234	37.5192	20.4458	2013-05-31 05:56:00	53
141.053	37.5546	14.6099	2013-06-03 09:00:00	32
141.046	37.5549	14.5819	2013-06-03 09:07:00	38
141.045	37.4616	4.26294	2013-06-03 09:34:00	210
141.053	37.4612	4.43522	2013-06-03 09:48:00	75
141.062	37.4609	4.72487	2013-06-03 10:20:00	800
141.015	37.2071	24.1555	2013-06-04 07:35:00	110
141.094	37.3863	6.61563	2013-06-04 08:50:00	460
141.061	37.3859	4.78288	2013-06-04 09:04:00	560
141.052	37.3863	4.43996	2013-06-04 09:16:00	82
141.044	37.3863	4.24772	2013-06-04 09:27:00	160
141.034	37.3263	10.843	2013-06-04 10:00:00	81
141.046	37.5883	18.2979	2013-06-06 04:48:00	28
141.073	37.5557	15.0089	2013-06-06 05:12:00	20
141.155	37.4102	10.6603	2013-06-09 05:35:00	9.6
141.149	37.3506	12.9215	2013-06-09 06:18:00	130
141.252	37.3867	19.5473	2013-06-10 08:25:00	190
141.2	37.3858	15.1394	2013-06-10 09:19:00	160
141.167	37.3854	12.3605	2013-06-10 09:33:00	220
141.028	37.2399	20.4591	2013-06-10 10:44:00	150
141.042	37.642	24.243	2013-06-11	11
141.052	37.6414	24.2185	2013-06-11	21
141.033	37.6422	24.2575	2013-06-11	170
141.073	37.4195	3.36205	2013-06-11 08:44:00	150
141.075	37.5032	9.47525	2013-06-11 09:17:00	220
141.065	37.5557	14.8733	2013-06-11 09:57:00	32
141.201	37.4189	14.6461	2013-06-12 08:30:00	400
141.075	37.3356	10.4066	2013-06-12 09:23:00	59
141.049	37.2456	19.8493	2013-06-12 09:59:00	120
141.049	37.3135	12.3228	2013-06-14 06:13:00	97
141.041	37.2672	17.417	2013-06-14 06:37:00	190
141.085	37.432	4.44142	2013-06-17 05:53:00	150
141.082	37.4605	5.76317	2013-06-17 06:19:00	19
141.076	37.3861	5.53038	2013-06-23 06:26:00	84
141.026	37.3228	11.2655	2013-06-25	150
141.026	37.3106	12.6222	2013-06-25	470
141.234	37.5192	20.4458	2013-06-26 04:50:00	52
141.217	37.5367	20.3583	2013-06-26 05:20:00	28
141.053	37.5546	14.6099	2013-07-01 08:47:00	13
141.046	37.5549	14.5819	2013-07-01 08:58:00	25
141.045	37.4616	4.26294	2013-07-01 09:26:00	170
141.053	37.4612	4.43522	2013-07-01 09:49:00	26
141.062	37.4609	4.72487	2013-07-01 10:03:00	16
141.134	37.5824	19.6265	2013-07-02	5.9
141.231	37.5825	24.6368	2013-07-02	14
141.362	37.4198	28.7983	2013-07-02	81
141.015	37.2071	24.1555	2013-07-02 07:20:00	97
141.094	37.3863	6.61563	2013-07-02 08:17:00	620
141.061	37.3859	4.78288	2013-07-02 08:32:00	25
141.052	37.3863	4.43996	2013-07-02 08:43:00	88
141.044	37.3863	4.24772	2013-07-02 08:59:00	58
141.034	37.3263	10.843	2013-07-02 10:30:00	100
141.052	37.6414	24.2185	2013-07-03	36
141.042	37.642	24.243	2013-07-03	230
141.033	37.6422	24.2575	2013-07-03	250
141.047	37.6448	24.5649	2013-07-03 06:05:00	3
141.155	37.4102	10.6603	2013-07-07 05:35:00	9
141.149	37.3506	12.9215	2013-07-07 06:27:00	83
141.252	37.3867	19.5473	2013-07-08 08:03:00	78
141.2	37.3858	15.1394	2013-07-08 08:29:00	100
141.2	37.235	25.5303	2013-07-08 09:01:00	59
141.167	37.3854	12.3605	2013-07-08 09:02:00	140
141.028	37.2399	20.4591	2013-07-08 10:02:00	240
141.065	37.5557	14.8733	2013-07-09 09:09:00	34
141.075	37.5032	9.47525	2013-07-09 09:33:00	61
141.073	37.4195	3.36205	2013-07-09 10:10:00	85
141.073	37.5557	15.0089	2013-07-10 04:35:00	25
141.046	37.5883	18.2979	2013-07-10 04:59:00	23
141.201	37.4189	14.6461	2013-07-10 08:25:00	170
141.075	37.3356	10.4066	2013-07-10 09:30:00	200
141.049	37.2456	19.8493	2013-07-10 10:12:00	110
141.049	37.3135	12.3228	2013-07-12 06:16:00	290
141.041	37.2672	17.417	2013-07-12 06:37:00	390
141.085	37.432	4.44142	2013-07-16 05:55:00	100
141.082	37.4605	5.76317	2013-07-16 06:22:00	20
141.076	37.3861	5.53038	2013-07-18 06:49:00	25
141.217	37.5367	20.3583	2013-07-23 05:24:00	16
141.234	37.5192	20.4458	2013-07-23 05:53:00	39
141.053	37.5546	14.6099	2013-08-05 08:39:00	51
141.046	37.5549	14.5819	2013-08-05 08:48:00	31
141.045	37.4616	4.26294	2013-08-05 09:12:00	270
141.053	37.4612	4.43522	2013-08-05 09:21:00	160
141.062	37.4609	4.72487	2013-08-05 09:30:00	100
141.042	37.642	24.243	2013-08-06	6.1
141.052	37.6414	24.2185	2013-08-06	30
141.033	37.6422	24.2575	2013-08-06	100
141.015	37.2071	24.1555	2013-08-06 07:35:00	99
141.065	37.5557	14.8733	2013-08-06 08:48:00	20
141.034	37.3263	10.843	2013-08-06 10:00:00	150
141.046	37.5883	18.2979	2013-08-08 04:38:00	9.5
141.046	37.5883	18.2979	2013-08-08 04:38:00	10
141.073	37.5557	15.0089	2013-08-08 05:01:00	25
141.155	37.4102	10.6603	2013-08-11 05:24:00	10
141.155	37.4102	10.6603	2013-08-11 05:24:00	10
141.149	37.3506	12.9215	2013-08-11 06:14:00	61
141.094	37.3863	6.61563	2013-08-12 08:02:00	24
141.094	37.3863	6.61563	2013-08-12 08:02:00	24
141.061	37.3859	4.78288	2013-08-12 08:10:00	27
141.061	37.3859	4.78288	2013-08-12 08:17:00	27
141.052	37.3863	4.43996	2013-08-12 08:30:00	170
141.044	37.3863	4.24772	2013-08-12 08:39:00	82
141.252	37.3867	19.5473	2013-08-13 08:02:00	71
141.2	37.3858	15.1394	2013-08-13 08:21:00	110
141.167	37.3854	12.3605	2013-08-13 08:45:00	410
141.028	37.2399	20.4591	2013-08-13 09:32:00	17
141.073	37.4195	3.36205	2013-08-14 08:30:00	570
141.075	37.5032	9.47525	2013-08-14 08:58:00	62
141.201	37.4189	14.6461	2013-08-15 08:05:00	170
141.075	37.3356	10.4066	2013-08-15 08:52:00	55
141.049	37.2456	19.8493	2013-08-15 09:29:00	93
141.049	37.3135	12.3228	2013-08-18 06:04:00	310
141.049	37.3135	12.3228	2013-08-18 06:05:00	310
141.041	37.2672	17.417	2013-08-18 06:31:00	26
141.041	37.2672	17.417	2013-08-18 06:31:00	26
141.057	37.3853	4.704	2013-08-19	97
141.059	37.4578	4.29753	2013-08-19	130
141.373	37.415	29.84	2013-08-21	89
141.076	37.3861	5.53038	2013-08-23 06:51:00	25
141.234	37.5192	20.4458	2013-08-26 05:44:00	27
141.217	37.5367	20.3583	2013-08-26 06:12:00	18
141.217	37.5367	20.3583	2013-08-26 06:12:00	18
141.026	37.3228	11.2655	2013-08-28	100
141.026	37.3106	12.6222	2013-08-28	210
141.085	37.432	4.44142	2013-08-28 05:44:00	48
141.082	37.4605	5.76317	2013-08-28 06:06:00	19
141.082	37.4605	5.76317	2013-08-28 06:06:00	19
141.062	37.4609	4.72487	2013-09-02 08:32:00	26
141.053	37.4612	4.43522	2013-09-02 08:45:00	31
141.045	37.4616	4.26294	2013-09-02 08:55:00	36
141.046	37.5549	14.5819	2013-09-02 09:31:00	5.3
141.053	37.5546	14.6099	2013-09-02 09:41:00	29
141.015	37.2071	24.1555	2013-09-03 07:30:00	93
141.2	37.235	25.5303	2013-09-03 09:15:00	85
141.065	37.5557	14.8733	2013-09-03 09:24:00	31
141.034	37.3263	10.843	2013-09-03 10:00:00	100
141.047	37.6448	24.5649	2013-09-04 06:10:00	3.2
141.046	37.5883	18.2979	2013-09-05 05:44:00	17
141.073	37.4195	3.36205	2013-09-07 05:24:00	69
141.149	37.3506	12.9215	2013-09-07 06:12:00	350
141.252	37.3867	19.5473	2013-09-10 08:33:00	60
141.2	37.3858	15.1394	2013-09-10 09:13:00	110
141.167	37.3854	12.3605	2013-09-10 09:31:00	140
141.028	37.2399	20.4591	2013-09-10 10:33:00	120
141.042	37.642	24.243	2013-09-11	6.7
141.033	37.6422	24.2575	2013-09-11	17
141.052	37.6414	24.2185	2013-09-11	22
141.085	37.432	4.44142	2013-09-11 08:26:00	120
141.201	37.4189	14.6461	2013-09-11 08:44:00	170
141.075	37.5032	9.47525	2013-09-11 09:40:00	380
141.075	37.3356	10.4066	2013-09-11 09:55:00	1400
141.049	37.2456	19.8493	2013-09-11 10:44:00	2600
141.082	37.4605	5.76317	2013-09-12 06:05:00	210
141.094	37.3863	6.61563	2013-09-13 08:10:00	1800
141.061	37.3859	4.78288	2013-09-13 08:29:00	130
141.052	37.3863	4.43996	2013-09-13 08:41:00	190
141.044	37.3863	4.24772	2013-09-13 08:55:00	1900
141.049	37.3135	12.3228	2013-09-19 12:43:00	120
141.041	37.2672	17.417	2013-09-19 13:06:00	48
141.155	37.4102	10.6603	2013-09-24 05:53:00	18
141.217	37.5367	20.3583	2013-09-24 06:21:00	8.3
141.234	37.5192	20.4458	2013-09-24 08:33:00	100
141.015	37.2071	24.1555	2013-10-01 07:25:00	110
141.053	37.5546	14.6099	2013-10-01 09:24:00	6.5
141.046	37.5549	14.5819	2013-10-01 09:38:00	28
141.062	37.4609	4.72487	2013-10-01 10:04:00	22
141.053	37.4612	4.43522	2013-10-01 10:15:00	190
141.045	37.4616	4.26294	2013-10-01 10:25:00	17
141.034	37.3263	10.843	2013-10-01 11:00:00	100
141.094	37.3863	6.61563	2013-10-03 08:46:00	95
141.252	37.3867	19.5473	2013-10-03 08:52:00	46
141.061	37.3859	4.78288	2013-10-03 09:08:00	220
141.052	37.3863	4.43996	2013-10-03 09:25:00	190
141.2	37.3858	15.1394	2013-10-03 09:26:00	97
141.044	37.3863	4.24772	2013-10-03 09:35:00	570
141.167	37.3854	12.3605	2013-10-03 09:42:00	140
141.028	37.2399	20.4591	2013-10-03 10:33:00	48
141.076	37.3861	5.53038	2013-10-05 06:47:00	12
141.042	37.642	24.243	2013-10-07	4
141.052	37.6414	24.2185	2013-10-07	9.1
141.033	37.6422	24.2575	2013-10-07	44
141.073	37.4195	3.36205	2013-10-08 07:56:00	36
141.201	37.4189	14.6461	2013-10-08 08:46:00	150
141.075	37.5032	9.47525	2013-10-08 09:15:00	32
141.065	37.5557	14.8733	2013-10-08 09:39:00	25
141.075	37.3356	10.4066	2013-10-08 10:22:00	630
141.049	37.2456	19.8493	2013-10-08 11:20:00	69
141.085	37.432	4.44142	2013-10-10 06:17:00	22
141.082	37.4605	5.76317	2013-10-10 06:39:00	7.2
141.234	37.5192	20.4458	2013-10-29 06:02:00	24
141.217	37.5367	20.3583	2013-10-29 06:37:00	8.2
141.073	37.5557	15.0089	2013-10-30 05:47:00	16
141.046	37.5883	18.2979	2013-10-30 06:03:00	18
141.053	37.5546	14.6099	2013-11-01 08:56:00	16
141.046	37.5549	14.5819	2013-11-01 09:06:00	14
141.052	37.3863	4.43996	2013-11-01 09:22:00	45
141.062	37.4609	4.72487	2013-11-01 09:29:00	44
141.053	37.4612	4.43522	2013-11-01 09:49:00	150
141.045	37.4616	4.26294	2013-11-01 10:02:00	100
141.034	37.3263	10.843	2013-11-05 10:00:00	82
141.015	37.2071	24.1555	2013-11-05 11:00:00	140
141.042	37.642	24.243	2013-11-06	4.9
141.052	37.6414	24.2185	2013-11-06	8.5
141.033	37.6422	24.2575	2013-11-06	110
141.252	37.3867	19.5473	2013-11-06 08:20:00	45
141.2	37.3858	15.1394	2013-11-06 08:53:00	61
141.167	37.3854	12.3605	2013-11-06 09:09:00	130
141.028	37.2399	20.4591	2013-11-06 10:09:00	150
141.065	37.5557	14.8733	2013-11-07 09:19:00	28
141.076	37.3861	5.53038	2013-11-08 06:49:00	55
141.201	37.4189	14.6461	2013-11-08 08:46:00	370
141.373	37.415	29.84	2013-11-09	42
141.059	37.4578	4.29753	2013-11-12	61
141.057	37.3853	4.704	2013-11-12	140
141.094	37.3863	6.61563	2013-11-12 08:15:00	1000
141.061	37.3859	4.78288	2013-11-12 08:33:00	110
141.052	37.3863	4.43996	2013-11-12 08:46:00	52
141.044	37.3863	4.24772	2013-11-12 08:57:00	220
141.075	37.5032	9.47525	2013-11-13 10:05:00	14
141.075	37.3356	10.4066	2013-11-13 10:17:00	200
141.073	37.4195	3.36205	2013-11-13 11:01:00	57
141.049	37.2456	19.8493	2013-11-13 11:20:00	40
141.085	37.432	4.44142	2013-11-14 06:28:00	25
141.082	37.4605	5.76317	2013-11-14 06:55:00	10
141.076	37.3861	5.53038	2013-11-17 06:45:00	17
141.026	37.3228	11.2655	2013-11-20	120
141.026	37.3106	12.6222	2013-11-20	290
141.234	37.5192	20.4458	2013-11-21 06:30:00	48
141.217	37.5367	20.3583	2013-11-21 07:11:00	6.3
141.047	37.6448	24.5649	2013-11-22 06:40:00	14
141.155	37.4102	10.6603	2013-11-23 05:50:00	8.7
141.149	37.3506	12.9215	2013-11-23 06:32:00	43
141.049	37.3135	12.3228	2013-11-24 06:37:00	270
141.041	37.2672	17.417	2013-11-24 07:03:00	11
141.073	37.5557	15.0089	2013-11-28 06:17:00	500
141.046	37.5883	18.2979	2013-11-28 06:44:00	67
141.049	37.3135	12.3228	2013-12-01 06:28:00	180
141.041	37.2672	17.417	2013-12-01 06:57:00	7.2
141.024	37.2474	19.6406	2013-12-03 07:20:00	81
141.034	37.3263	10.843	2013-12-03 10:00:00	110
141.201	37.4189	14.6461	2013-12-05 08:45:00	200
141.045	37.4616	4.26294	2013-12-05 09:04:00	44
141.053	37.4612	4.43522	2013-12-05 09:19:00	5.7
141.062	37.4609	4.72487	2013-12-05 09:26:00	59
141.046	37.5549	14.5819	2013-12-05 09:48:00	35
141.075	37.3356	10.4066	2013-12-05 09:56:00	53
141.053	37.5546	14.6099	2013-12-05 09:58:00	19
141.049	37.2456	19.8493	2013-12-05 10:38:00	98
141.076	37.3861	5.53038	2013-12-08 06:36:00	11
141.094	37.3863	6.61563	2013-12-09 08:10:00	330
141.061	37.3859	4.78288	2013-12-09 08:31:00	210
141.052	37.3863	4.43996	2013-12-09 08:48:00	58
141.044	37.3863	4.24772	2013-12-09 08:59:00	170
141.082	37.4605	5.76317	2013-12-12 07:23:00	12
141.085	37.432	4.44142	2013-12-12 07:49:00	14
141.155	37.4102	10.6603	2013-12-14 08:14:00	8.9
141.149	37.3506	12.9215	2013-12-14 08:53:00	53
141.052	37.6414	24.2185	2013-12-16	23
141.033	37.6422	24.2575	2013-12-16	69
141.042	37.642	24.243	2013-12-16	ND	10
141.065	37.5557	14.8733	2013-12-17 08:56:00	41
141.075	37.5032	9.47525	2013-12-17 09:29:00	31
141.073	37.4195	3.36205	2013-12-17 10:29:00	130
141.217	37.5367	20.3583	2013-12-24 05:55:00	6.6
141.234	37.5192	20.4458	2013-12-24 06:29:00	32
141.073	37.5557	15.0089	2013-12-26 06:25:00	23
141.046	37.5883	18.2979	2013-12-26 06:48:00	33
141.028	37.2399	20.4591	2013-12-29 08:15:00	190
141.201	37.4189	14.6461	2014-01-06 08:29:00	280
141.134	37.5824	19.6265	2014-01-07	4.7
141.231	37.5825	24.6368	2014-01-07	8.8
141.362	37.4198	28.7983	2014-01-07	65
141.015	37.2071	24.1555	2014-01-07 07:20:00	95
141.053	37.5546	14.6099	2014-01-07 08:56:00	38
141.046	37.5549	14.5819	2014-01-07 09:07:00	12
141.062	37.4609	4.72487	2014-01-07 09:36:00	55
141.053	37.4612	4.43522	2014-01-07 09:47:00	87
141.045	37.4616	4.26294	2014-01-07 09:58:00	150
141.034	37.3263	10.843	2014-01-07 10:00:00	110
141.042	37.642	24.243	2014-01-08	2.6
141.052	37.6414	24.2185	2014-01-08	12
141.033	37.6422	24.2575	2014-01-08	28
141.094	37.3863	6.61563	2014-01-08 07:47:00	43
141.061	37.3859	4.78288	2014-01-08 08:23:00	140
141.052	37.3863	4.43996	2014-01-08 08:35:00	310
141.044	37.3863	4.24772	2014-01-08 08:45:00	730
141.052	37.3863	4.43996	2014-01-08 09:19:00	27
141.047	37.6448	24.5649	2014-01-10 06:30:00	4
141.076	37.3861	5.53038	2014-01-10 06:47:00	20
141.155	37.4102	10.6603	2014-01-11 06:15:00	10
141.149	37.3506	12.9215	2014-01-11 07:02:00	23
141.065	37.5557	14.8733	2014-01-14 08:38:00	18
141.075	37.5032	9.47525	2014-01-14 09:16:00	110
141.073	37.4195	3.36205	2014-01-14 10:31:00	100
141.217	37.5367	20.3583	2014-01-15 06:40:00	9.3
141.234	37.5192	20.4458	2014-01-15 07:06:00	14
141.073	37.5557	15.0089	2014-01-16 05:54:00	11
141.046	37.5883	18.2979	2014-01-16 06:19:00	31
141.075	37.3356	10.4066	2014-01-17 09:29:00	82
141.049	37.2456	19.8493	2014-01-17 10:16:00	110
141.049	37.3135	12.3228	2014-01-19 06:42:00	480
141.041	37.2672	17.417	2014-01-19 07:12:00	43
141.373	37.415	29.84	2014-01-23	71
141.085	37.432	4.44142	2014-01-23 06:27:00	15
141.082	37.4605	5.76317	2014-01-23 06:48:00	20
141.252	37.3867	19.5473	2014-01-24 08:44:00	120
141.2	37.3858	15.1394	2014-01-24 09:14:00	130
141.167	37.3854	12.3605	2014-01-24 09:35:00	27
141.028	37.2399	20.4591	2014-01-24 10:48:00	410
141.076	37.3861	5.53038	2014-02-02 06:46:00	52
141.059	37.4578	4.29753	2014-02-03	72
141.057	37.3853	4.704	2014-02-03	120
141.201	37.4189	14.6461	2014-02-03 08:21:00	97
141.024	37.2474	19.6406	2014-02-04 07:30:00	80
141.052	37.6414	24.2185	2014-02-06	7.9
141.033	37.6422	24.2575	2014-02-06	22
141.042	37.642	24.243	2014-02-06	ND	10
141.155	37.4102	10.6603	2014-02-07 05:58:00	10
141.149	37.3506	12.9215	2014-02-07 06:43:00	12
141.062	37.4609	4.72487	2014-02-11 09:12:00	80
141.065	37.5557	14.8733	2014-02-11 09:26:00	15
141.053	37.4612	4.43522	2014-02-11 09:29:00	130
141.045	37.4616	4.26294	2014-02-11 09:43:00	140
141.075	37.5032	9.47525	2014-02-11 10:05:00	87
141.053	37.5546	14.6099	2014-02-11 10:35:00	47
141.046	37.5549	14.5819	2014-02-11 10:43:00	39
141.073	37.4195	3.36205	2014-02-11 11:08:00	39
141.252	37.3867	19.5473	2014-02-18 08:46:00	60
141.2	37.3858	15.1394	2014-02-18 09:07:00	74
141.167	37.3854	12.3605	2014-02-18 09:37:00	140
141.075	37.3356	10.4066	2014-02-18 10:12:00	130
141.034	37.3263	10.843	2014-02-18 10:40:00	150
141.049	37.2456	19.8493	2014-02-18 11:16:00	64
141.028	37.2399	20.4591	2014-02-18 11:42:00	190
141.026	37.3228	11.2655	2014-02-19	130
141.026	37.3106	12.6222	2014-02-19	170
141.094	37.3863	6.61563	2014-02-19 08:30:00	11
141.061	37.3859	4.78288	2014-02-19 09:11:00	100
141.052	37.3863	4.43996	2014-02-19 09:27:00	320
141.044	37.3863	4.24772	2014-02-19 09:40:00	470
141.073	37.5557	15.0089	2014-02-20 06:09:00	7.4
141.046	37.5883	18.2979	2014-02-20 06:36:00	30
141.049	37.3135	12.3228	2014-02-23 06:24:00	320
141.041	37.2672	17.417	2014-02-23 06:44:00	270
141.234	37.5192	20.4458	2014-02-25 06:05:00	9.5
141.217	37.5367	20.3583	2014-02-25 06:31:00	18
141.085	37.432	4.44142	2014-02-27 07:06:00	110
141.082	37.4605	5.76317	2014-02-27 07:28:00	44
141.053	37.5546	14.6099	2014-03-04 08:58:00	64
141.046	37.5549	14.5819	2014-03-04 09:09:00	4
141.034	37.3263	10.843	2014-03-04 09:30:00	94
141.062	37.4609	4.72487	2014-03-04 09:35:00	25
141.053	37.4612	4.43522	2014-03-04 09:44:00	160
141.045	37.4616	4.26294	2014-03-04 09:53:00	81
141.024	37.2474	19.6406	2014-03-04 11:30:00	220
141.052	37.3863	4.43996	2014-03-05 07:45:00	61
141.201	37.4189	14.6461	2014-03-05 08:30:00	120
141.094	37.3863	6.61563	2014-03-05 09:17:00	140
141.061	37.3859	4.78288	2014-03-05 09:28:00	160
141.052	37.3863	4.43996	2014-03-05 09:38:00	170
141.044	37.3863	4.24772	2014-03-05 09:47:00	86
141.065	37.5557	14.8733	2014-03-11 09:13:00	9.6
141.075	37.3356	10.4066	2014-03-11 09:18:00	44
141.075	37.5032	9.47525	2014-03-11 09:52:00	99
141.049	37.2456	19.8493	2014-03-11 10:04:00	120
141.073	37.4195	3.36205	2014-03-11 10:51:00	36
141.252	37.3867	19.5473	2014-03-12 08:32:00	38
141.2	37.3858	15.1394	2014-03-12 08:50:00	63
141.167	37.3854	12.3605	2014-03-12 09:20:00	17
141.028	37.2399	20.4591	2014-03-12 10:18:00	52
141.155	37.4102	10.6603	2014-03-15 05:30:00	12
141.149	37.3506	12.9215	2014-03-15 06:13:00	6.4
141.049	37.3135	12.3228	2014-03-16 06:14:00	260
141.041	37.2672	17.417	2014-03-16 06:36:00	64
141.047	37.6448	24.5649	2014-03-18 06:20:00	13
141.234	37.5192	20.4458	2014-03-20 06:34:00	23
141.217	37.5367	20.3583	2014-03-20 07:08:00	13
141.042	37.642	24.243	2014-03-25	7.2
141.052	37.6414	24.2185	2014-03-25	16
141.033	37.6422	24.2575	2014-03-25	19
141.073	37.5557	15.0089	2014-03-25 05:56:00	12
141.046	37.5883	18.2979	2014-03-25 06:20:00	23
141.082	37.4605	5.76317	2014-03-27 06:16:00	36
141.085	37.432	4.44142	2014-03-27 06:45:00	86
141.076	37.3861	5.53038	2014-03-29 06:32:00	10
141.024	37.2474	19.6406	2014-04-01 07:15:00	140
141.046	37.5549	14.5819	2014-04-01 08:42:00	13
141.053	37.5546	14.6099	2014-04-01 08:58:00	11
141.045	37.4616	4.26294	2014-04-01 09:31:00	68
141.053	37.4612	4.43522	2014-04-01 09:41:00	72
141.034	37.3263	10.843	2014-04-01 09:50:00	82
141.062	37.4609	4.72487	2014-04-01 09:51:00	220
141.201	37.4189	14.6461	2014-04-02 08:53:00	160
141.094	37.3863	6.61563	2014-04-07 08:20:00	1100
141.061	37.3859	4.78288	2014-04-07 08:34:00	120
141.052	37.3863	4.43996	2014-04-07 09:02:00	230
141.044	37.3863	4.24772	2014-04-07 09:14:00	420
141.075	37.3356	10.4066	2014-04-07 09:46:00	54
141.049	37.2456	19.8493	2014-04-07 10:25:00	140
141.052	37.6414	24.2185	2014-04-08	13
141.033	37.6422	24.2575	2014-04-08	23
141.042	37.642	24.243	2014-04-08	57
141.065	37.5557	14.8733	2014-04-08 09:07:00	9.3
141.075	37.5032	9.47525	2014-04-08 09:33:00	8.2
141.073	37.4195	3.36205	2014-04-08 10:45:00	24
141.252	37.3867	19.5473	2014-04-09 08:37:00	63
141.2	37.3858	15.1394	2014-04-09 09:05:00	83
141.167	37.3854	12.3605	2014-04-09 09:23:00	40
141.028	37.2399	20.4591	2014-04-09 10:22:00	95
141.155	37.4102	10.6603	2014-04-12 05:29:00	6.4
141.149	37.3506	12.9215	2014-04-12 06:07:00	39
141.049	37.3135	12.3228	2014-04-13 06:30:00	230
141.041	37.2672	17.417	2014-04-13 06:54:00	180
141.073	37.5557	15.0089	2014-04-15 06:00:00	50
141.046	37.5883	18.2979	2014-04-15 06:42:00	15
141.076	37.3861	5.53038	2014-04-19 06:16:00	9.6
141.217	37.5367	20.3583	2014-04-22 05:38:00	11
141.234	37.5192	20.4458	2014-04-22 06:09:00	18
141.085	37.432	4.44142	2014-04-24 06:11:00	44
141.082	37.4605	5.76317	2014-04-24 06:31:00	27
141.034	37.3263	10.843	2014-05-07 14:00:00	77
141.024	37.2474	19.6406	2014-05-07 16:15:00	96
141.252	37.3867	19.5473	2014-05-08 08:24:00	66
141.2	37.3858	15.1394	2014-05-08 08:46:00	100
141.167	37.3854	12.3605	2014-05-08 09:11:00	20
141.234	37.5192	20.4458	2014-05-09 06:10:00	66
141.217	37.5367	20.3583	2014-05-09 07:02:00	12
141.049	37.3135	12.3228	2014-05-11 05:57:00	61
141.041	37.2672	17.417	2014-05-11 06:17:00	45
141.057	37.3853	4.704	2014-05-12	150
141.042	37.642	24.243	2014-05-13	3.6
141.052	37.6414	24.2185	2014-05-13	9.6
141.033	37.6422	24.2575	2014-05-13	23
141.026	37.3228	11.2655	2014-05-14	93
141.026	37.3106	12.6222	2014-05-14	170
141.201	37.4189	14.6461	2014-05-14 08:28:00	81
141.065	37.5557	14.8733	2014-05-14 08:56:00	27
141.075	37.5032	9.47525	2014-05-14 09:26:00	84
141.075	37.3356	10.4066	2014-05-14 09:46:00	44
141.049	37.2456	19.8493	2014-05-14 10:39:00	48
141.073	37.4195	3.36205	2014-05-14 10:46:00	160
141.028	37.2399	20.4591	2014-05-14 11:06:00	170
141.073	37.5557	15.0089	2014-05-15 05:31:00	180
141.046	37.5883	18.2979	2014-05-15 05:55:00	11
141.373	37.415	29.84	2014-05-17	40
141.373	37.415	29.84	2014-05-17	40
141.076	37.3861	5.53038	2014-05-17 06:27:00	12
141.059	37.4578	4.29753	2014-05-19	53
141.155	37.4102	10.6603	2014-05-19 05:45:00	6.2
141.149	37.3506	12.9215	2014-05-19 06:31:00	18
141.094	37.3863	6.61563	2014-05-20 08:19:00	6.7
141.061	37.3859	4.78288	2014-05-20 08:42:00	79
141.052	37.3863	4.43996	2014-05-20 08:53:00	180
141.044	37.3863	4.24772	2014-05-20 09:03:00	400
141.053	37.5546	14.6099	2014-05-21 09:12:00	24
141.046	37.5549	14.5819	2014-05-21 09:25:00	16
141.062	37.4609	4.72487	2014-05-21 09:57:00	380
141.053	37.4612	4.43522	2014-05-21 10:09:00	84
141.045	37.4616	4.26294	2014-05-21 10:35:00	470
141.052	37.3863	4.43996	2014-05-26 07:44:00	110
141.085	37.432	4.44142	2014-05-29 05:45:00	200
141.082	37.4605	5.76317	2014-05-29 06:07:00	21
141.047	37.6448	24.5649	2014-05-30 05:28:00	3.8
141.094	37.3863	6.61563	2014-06-03 08:08:00	8.2
141.092	37.3833	6.70736	2014-06-03 08:08:00	8.2
141.061	37.3859	4.78288	2014-06-03 08:25:00	68
141.058	37.3833	4.94135	2014-06-03 08:25:00	68
141.052	37.3863	4.43996	2014-06-03 08:36:00	130
141.05	37.3833	4.68825	2014-06-03 08:36:00	130
141.044	37.3863	4.24772	2014-06-03 08:48:00	270
141.042	37.3833	4.54142	2014-06-03 08:48:00	270
141.034	37.3263	10.843	2014-06-03 10:00:00	99
141.034	37.3263	10.843	2014-06-03 10:00:00	99
141.024	37.2474	19.6406	2014-06-03 16:10:00	130
141.024	37.2474	19.6406	2014-06-03 16:10:00	130
141.052	37.6414	24.2185	2014-06-04	7.5
141.042	37.642	24.243	2014-06-04	10
141.033	37.6422	24.2575	2014-06-04	14
141.252	37.3867	19.5473	2014-06-04 07:53:00	54
141.25	37.3833	19.4721	2014-06-04 07:53:00	54
141.2	37.3858	15.1394	2014-06-04 08:26:00	73
141.2	37.3833	15.2127	2014-06-04 08:26:00	73
141.167	37.3854	12.3605	2014-06-04 08:41:00	130
141.167	37.3833	12.4331	2014-06-04 08:41:00	130
141.028	37.2399	20.4591	2014-06-04 09:38:00	62
141.025	37.2383	20.6404	2014-06-04 09:38:00	62
141.053	37.5546	14.6099	2014-06-05 08:24:00	18
141.05	37.5517	14.2559	2014-06-05 08:24:00	18
141.046	37.5549	14.5819	2014-06-05 08:36:00	16
141.042	37.5517	14.2084	2014-06-05 08:36:00	16
141.062	37.4609	4.72487	2014-06-05 09:06:00	70
141.058	37.4583	4.32851	2014-06-05 09:06:00	70
141.05	37.4583	4.03747	2014-06-05 09:21:00	120
141.042	37.4583	3.86618	2014-06-05 09:29:00	26
141.053	37.4612	4.43522	2014-06-09 09:21:00	120
141.045	37.4616	4.26294	2014-06-09 09:29:00	26
141.201	37.4189	14.6461	2014-06-10 08:21:00	100
141.201	37.4189	14.6461	2014-06-10 08:21:00	100
141.065	37.5557	14.8733	2014-06-10 08:28:00	15
141.065	37.5557	14.8733	2014-06-10 08:28:00	15
141.075	37.5032	9.47525	2014-06-10 09:01:00	80
141.075	37.5032	9.47525	2014-06-10 09:01:00	80
141.075	37.3356	10.4066	2014-06-10 09:26:00	69
141.075	37.3356	10.4066	2014-06-10 09:26:00	69
141.049	37.2456	19.8493	2014-06-10 10:09:00	100
141.049	37.2456	19.8493	2014-06-10 10:09:00	100
141.073	37.4195	3.36205	2014-06-10 10:27:00	39
141.073	37.4195	3.36205	2014-06-10 10:27:00	39
141.076	37.3861	5.53038	2014-06-14 06:26:00	7.2
141.076	37.3861	5.53038	2014-06-14 06:26:00	7.2
141.155	37.4102	10.6603	2014-06-16 05:06:00	10
141.155	37.4102	10.6603	2014-06-16 05:06:00	10
141.149	37.3506	12.9215	2014-06-16 05:47:00	31
141.149	37.3506	12.9215	2014-06-16 05:47:00	31
141.082	37.4605	5.76317	2014-06-18 05:51:00	21
141.082	37.4605	5.76317	2014-06-18 05:51:00	21
141.085	37.432	4.44142	2014-06-18 06:15:00	42
141.085	37.432	4.44142	2014-06-18 06:15:00	42
141.049	37.3135	12.3228	2014-06-21 06:20:00	140
141.049	37.3135	12.3228	2014-06-21 06:20:00	140
141.041	37.2672	17.417	2014-06-21 06:40:00	51
141.041	37.2672	17.417	2014-06-21 06:40:00	51
141.234	37.5192	20.4458	2014-06-25 10:22:00	28
141.234	37.5192	20.4458	2014-06-25 10:22:00	28
141.217	37.5367	20.3583	2014-06-25 10:53:00	6.9
141.217	37.5367	20.3583	2014-06-25 10:53:00	6.9
141.073	37.5557	15.0089	2014-06-27 05:40:00	330
141.073	37.5557	15.0089	2014-06-27 05:40:00	330
141.046	37.5883	18.2979	2014-06-27 06:11:00	13
141.046	37.5883	18.2979	2014-06-27 06:11:00	13
141.034	37.3263	10.843	2014-07-01 14:25:00	54
141.034	37.3263	10.843	2014-07-01 14:25:00	54
141.024	37.2474	19.6406	2014-07-01 16:10:00	76
141.024	37.2474	19.6406	2014-07-01 16:10:00	76
141.134	37.5824	19.6265	2014-07-02	3.9
141.134	37.5824	19.6265	2014-07-02	3.9
141.231	37.5825	24.6368	2014-07-02	5.9
141.231	37.5825	24.6368	2014-07-02	5.9
141.362	37.4198	28.7983	2014-07-02	42
141.092	37.3833	6.70736	2014-07-02 07:49:00	11
141.061	37.3859	4.78288	2014-07-02 08:02:00	210
141.058	37.3833	4.94135	2014-07-02 08:02:00	210
141.052	37.3863	4.43996	2014-07-02 08:15:00	37
141.05	37.3833	4.68825	2014-07-02 08:15:00	37
141.044	37.3863	4.24772	2014-07-02 08:29:00	370
141.042	37.3833	4.54142	2014-07-02 08:29:00	370
141.042	37.642	24.243	2014-07-03	4.7
141.033	37.6422	24.2575	2014-07-03	21
141.052	37.6414	24.2185	2014-07-03	21
141.053	37.5546	14.6099	2014-07-03 08:50:00	21
141.05	37.5517	14.2559	2014-07-03 08:50:00	21
141.046	37.5549	14.5819	2014-07-03 09:03:00	18
141.042	37.5517	14.2084	2014-07-03 09:03:00	18
141.062	37.4609	4.72487	2014-07-03 09:38:00	140
141.058	37.4583	4.32851	2014-07-03 09:38:00	140
141.053	37.4612	4.43522	2014-07-03 10:08:00	59
141.05	37.4583	4.03747	2014-07-03 10:08:00	59
141.045	37.4616	4.26294	2014-07-03 10:16:00	110
141.042	37.4583	3.86618	2014-07-03 10:16:00	110
141.252	37.3867	19.5473	2014-07-04 08:14:00	89
141.25	37.3833	19.4721	2014-07-04 08:14:00	89
141.2	37.3858	15.1394	2014-07-04 08:59:00	56
141.2	37.3833	15.2127	2014-07-04 08:59:00	56
141.167	37.3854	12.3605	2014-07-04 09:18:00	58
141.167	37.3833	12.4331	2014-07-04 09:18:00	58
141.028	37.2399	20.4591	2014-07-04 10:26:00	85
141.025	37.2383	20.6404	2014-07-04 10:26:00	85
141.049	37.3135	12.3228	2014-07-06 06:03:00	160
141.049	37.3135	12.3228	2014-07-06 06:03:00	160
141.041	37.2672	17.417	2014-07-06 06:24:00	12
141.041	37.2672	17.417	2014-07-06 06:24:00	12
141.201	37.4189	14.6461	2014-07-08 08:20:00	130
141.201	37.4189	14.6461	2014-07-08 08:20:00	130
141.075	37.3356	10.4066	2014-07-08 09:15:00	100
141.075	37.3356	10.4066	2014-07-08 09:15:00	100
141.049	37.2456	19.8493	2014-07-08 09:52:00	84
141.049	37.2456	19.8493	2014-07-08 09:52:00	84
141.073	37.4195	3.36205	2014-07-09 08:12:00	12
141.073	37.4195	3.36205	2014-07-09 08:12:00	12
141.075	37.5032	9.47525	2014-07-09 08:44:00	36
141.075	37.5032	9.47525	2014-07-09 08:44:00	36
141.065	37.5557	14.8733	2014-07-09 09:12:00	6.4
141.065	37.5557	14.8733	2014-07-09 09:12:00	6.4
141.155	37.4102	10.6603	2014-07-14 05:42:00	5.9
141.155	37.4102	10.6603	2014-07-14 05:42:00	5.9
141.149	37.3506	12.9215	2014-07-14 06:23:00	110
141.149	37.3506	12.9215	2014-07-14 06:23:00	110
141.2	37.235	25.5303	2014-07-15 07:52:00	47
141.2	37.235	25.5303	2014-07-15 07:52:00	47
141.085	37.432	4.44142	2014-07-17 05:44:00	200
141.085	37.432	4.44142	2014-07-17 05:44:00	200
141.082	37.4605	5.76317	2014-07-17 06:15:00	31
141.082	37.4605	5.76317	2014-07-17 06:15:00	31
141.047	37.6448	24.5649	2014-07-24 05:50:00	3.2
141.047	37.6448	24.5649	2014-07-24 05:50:00	3.2
141.046	37.5883	18.2979	2014-07-25 05:51:00	19
141.046	37.5883	18.2979	2014-07-25 05:51:00	19
141.073	37.5557	15.0089	2014-07-25 06:18:00	20
141.073	37.5557	15.0089	2014-07-25 06:18:00	20
141.094	37.3863	6.61563	2014-07-27 06:15:00	11
141.076	37.3861	5.53038	2014-07-27 06:15:00	12
141.076	37.3861	5.53038	2014-07-27 06:15:00	12
141.234	37.5192	20.4458	2014-07-29 06:18:00	210
141.234	37.5192	20.4458	2014-07-29 06:18:00	210
141.217	37.5367	20.3583	2014-07-29 06:46:00	8.5
141.217	37.5367	20.3583	2014-07-29 06:46:00	8.5
141.053	37.5546	14.6099	2014-08-01 08:54:00	28
141.05	37.5517	14.2559	2014-08-01 08:54:00	28
141.046	37.5549	14.5819	2014-08-01 09:01:00	13
141.042	37.5517	14.2084	2014-08-01 09:01:00	13
141.062	37.4609	4.72487	2014-08-01 09:34:00	310
141.058	37.4583	4.32851	2014-08-01 09:34:00	310
141.053	37.4612	4.43522	2014-08-01 09:50:00	110
141.05	37.4583	4.03747	2014-08-01 09:50:00	110
141.045	37.4616	4.26294	2014-08-01 10:01:00	96
141.042	37.4583	3.86618	2014-08-01 10:01:00	96
141.049	37.3135	12.3228	2014-08-03 06:19:00	260
141.049	37.3135	12.3228	2014-08-03 06:19:00	260
141.041	37.2672	17.417	2014-08-03 06:40:00	28
141.041	37.2672	17.417	2014-08-03 06:40:00	28
141.042	37.642	24.243	2014-08-04	3.9
141.052	37.6414	24.2185	2014-08-04	7.1
141.033	37.6422	24.2575	2014-08-04	18
141.061	37.3859	4.78288	2014-08-04 08:26:00	90
141.058	37.3833	4.94135	2014-08-04 08:26:00	90
141.052	37.3863	4.43996	2014-08-04 08:39:00	210
141.05	37.3833	4.68825	2014-08-04 08:39:00	210
141.044	37.3863	4.24772	2014-08-04 08:52:00	400
141.042	37.3833	4.54142	2014-08-04 08:52:00	400
141.094	37.3863	6.61563	2014-08-04 09:19:00	130
141.092	37.3833	6.70736	2014-08-04 09:19:00	130
141.065	37.5557	14.8733	2014-08-04 09:21:00	33
141.065	37.5557	14.8733	2014-08-04 09:21:00	33
141.075	37.5032	9.47525	2014-08-04 09:56:00	26
141.075	37.5032	9.47525	2014-08-04 09:56:00	26
141.073	37.4195	3.36205	2014-08-04 10:48:00	58
141.073	37.4195	3.36205	2014-08-04 10:48:00	58
141.252	37.3867	19.5473	2014-08-05 07:57:00	56
141.25	37.3833	19.4721	2014-08-05 07:57:00	56
141.2	37.3858	15.1394	2014-08-05 08:29:00	80
141.2	37.3833	15.2127	2014-08-05 08:29:00	80
141.201	37.4189	14.6461	2014-08-05 08:37:00	150
141.201	37.4189	14.6461	2014-08-05 08:37:00	150
141.167	37.3854	12.3605	2014-08-05 08:41:00	200
141.167	37.3833	12.4331	2014-08-05 08:41:00	200
141.028	37.2399	20.4591	2014-08-05 09:40:00	23
141.025	37.2383	20.6404	2014-08-05 09:40:00	23
141.075	37.3356	10.4066	2014-08-05 09:54:00	45
141.075	37.3356	10.4066	2014-08-05 09:54:00	45
141.034	37.3263	10.843	2014-08-05 10:10:00	70
141.034	37.3263	10.843	2014-08-05 10:10:00	70
141.049	37.2456	19.8493	2014-08-05 10:43:00	190
141.049	37.2456	19.8493	2014-08-05 10:43:00	190
141.024	37.2474	19.6406	2014-08-05 16:10:00	250
141.024	37.2474	19.6406	2014-08-05 16:10:00	250
141.085	37.432	4.44142	2014-08-07 05:56:00	33
141.085	37.432	4.44142	2014-08-07 05:56:00	33
141.082	37.4605	5.76317	2014-08-07 06:22:00	14
141.082	37.4605	5.76317	2014-08-07 06:22:00	14
141.057	37.3853	4.704	2014-08-20	72
141.059	37.4578	4.29753	2014-08-20	81
141.026	37.3228	11.2655	2014-08-20	84
141.026	37.3106	12.6222	2014-08-20	200
141.234	37.5192	20.4458	2014-08-20 06:22:00	18
141.234	37.5192	20.4458	2014-08-20 06:22:00	18
141.217	37.5367	20.3583	2014-08-20 06:54:00	4.9
141.217	37.5367	20.3583	2014-08-20 06:54:00	4.9
141.073	37.5557	15.0089	2014-08-21 05:41:00	28
141.073	37.5557	15.0089	2014-08-21 05:41:00	28
141.046	37.5883	18.2979	2014-08-21 06:02:00	18
141.046	37.5883	18.2979	2014-08-21 06:02:00	18
141.373	37.415	29.84	2014-08-22	140
141.076	37.3861	5.53038	2014-08-23 06:33:00	14
141.076	37.3861	5.53038	2014-08-23 06:33:00	14
141.155	37.4102	10.6603	2014-08-29 05:27:00	11
141.155	37.4102	10.6603	2014-08-29 05:27:00	11
141.149	37.3506	12.9215	2014-08-29 06:19:00	20
141.149	37.3506	12.9215	2014-08-29 06:19:00	20
141.094	37.3863	6.61563	2014-09-01 08:11:00	1700
141.092	37.3833	6.70736	2014-09-01 08:11:00	1700
141.061	37.3859	4.78288	2014-09-01 08:41:00	57
141.058	37.3833	4.94135	2014-09-01 08:41:00	57
141.052	37.3863	4.43996	2014-09-01 08:51:00	170
141.05	37.3833	4.68825	2014-09-01 08:51:00	170
141.044	37.3863	4.24772	2014-09-01 09:02:00	530
141.042	37.3833	4.54142	2014-09-01 09:02:00	530
141.065	37.5557	14.8733	2014-09-01 09:05:00	25
141.065	37.5557	14.8733	2014-09-01 09:05:00	25
141.075	37.5032	9.47525	2014-09-01 09:43:00	29
141.075	37.5032	9.47525	2014-09-01 09:43:00	29
141.073	37.4195	3.36205	2014-09-01 10:24:00	120
141.073	37.4195	3.36205	2014-09-01 10:24:00	120
141.028	37.2399	20.4591	2014-09-02 07:46:00	64
141.025	37.2383	20.6404	2014-09-02 07:46:00	64
141.167	37.3854	12.3605	2014-09-02 09:06:00	81
141.167	37.3833	12.4331	2014-09-02 09:06:00	81
141.2	37.3858	15.1394	2014-09-02 09:19:00	97
141.2	37.3833	15.2127	2014-09-02 09:19:00	97
141.201	37.4189	14.6461	2014-09-02 09:20:00	79
141.201	37.4189	14.6461	2014-09-02 09:20:00	79
141.252	37.3867	19.5473	2014-09-02 10:02:00	32
141.25	37.3833	19.4721	2014-09-02 10:02:00	32
141.075	37.3356	10.4066	2014-09-02 10:23:00	190
141.075	37.3356	10.4066	2014-09-02 10:23:00	190
141.049	37.2456	19.8493	2014-09-02 11:16:00	53
141.049	37.2456	19.8493	2014-09-02 11:16:00	53
141.024	37.2474	19.6406	2014-09-02 16:10:00	60
141.024	37.2474	19.6406	2014-09-02 16:10:00	60
141.062	37.4609	4.72487	2014-09-03 08:23:00	19
141.058	37.4583	4.32851	2014-09-03 08:23:00	19
141.053	37.4612	4.43522	2014-09-03 08:36:00	100
141.05	37.4583	4.03747	2014-09-03 08:36:00	100
141.045	37.4616	4.26294	2014-09-03 08:49:00	12
141.042	37.4583	3.86618	2014-09-03 08:49:00	12
141.046	37.5549	14.5819	2014-09-03 09:21:00	3.3
141.042	37.5517	14.2084	2014-09-03 09:21:00	3.3
141.053	37.5546	14.6099	2014-09-03 09:32:00	7.9
141.05	37.5517	14.2559	2014-09-03 09:32:00	7.9
141.052	37.6414	24.2185	2014-09-04	5.2
141.042	37.642	24.243	2014-09-04	7.5
141.033	37.6422	24.2575	2014-09-04	8
141.049	37.3135	12.3228	2014-09-04 06:47:00	110
141.049	37.3135	12.3228	2014-09-04 06:47:00	110
141.041	37.2672	17.417	2014-09-04 07:28:00	13
141.041	37.2672	17.417	2014-09-04 07:28:00	13
141.155	37.4102	10.6603	2014-09-06 05:55:00	5.6
141.155	37.4102	10.6603	2014-09-06 05:55:00	5.6
141.149	37.3506	12.9215	2014-09-06 06:41:00	60
141.149	37.3506	12.9215	2014-09-06 06:41:00	60
141.034	37.3263	10.843	2014-09-09 09:50:00	76
141.034	37.3263	10.843	2014-09-09 09:50:00	76
141.2	37.235	25.5303	2014-09-12 10:50:00	66
141.2	37.235	25.5303	2014-09-12 10:50:00	66
141.047	37.6448	24.5649	2014-09-17 06:00:00	ND	1.9
141.047	37.6448	24.5649	2014-09-17 06:00:00	ND	1.9
141.234	37.5192	20.4458	2014-09-18 06:11:00	23
141.234	37.5192	20.4458	2014-09-18 06:11:00	23
141.217	37.5367	20.3583	2014-09-18 06:47:00	5.9
141.217	37.5367	20.3583	2014-09-18 06:47:00	5.9
141.076	37.3861	5.53038	2014-09-21 06:40:00	8.2
141.076	37.3861	5.53038	2014-09-21 06:40:00	8.2
141.085	37.432	4.44142	2014-09-24 05:46:00	400
141.085	37.432	4.44142	2014-09-24 05:46:00	400
141.082	37.4605	5.76317	2014-09-24 06:14:00	8.5
141.082	37.4605	5.76317	2014-09-24 06:14:00	8.5
141.073	37.5557	15.0089	2014-09-26 05:48:00	100
141.073	37.5557	15.0089	2014-09-26 05:48:00	100
141.046	37.5883	18.2979	2014-09-26 06:14:00	12
141.046	37.5883	18.2979	2014-09-26 06:14:00	12
141.042	37.5517	14.2084	2014-10-01 08:56:00	14
141.05	37.5517	14.2559	2014-10-01 09:08:00	70
141.058	37.4583	4.32851	2014-10-01 09:38:00	60
141.05	37.4583	4.03747	2014-10-01 09:47:00	110
141.042	37.4583	3.86618	2014-10-01 09:59:00	160
141.201	37.4189	14.6461	2014-10-02 08:28:00	92
141.075	37.3356	10.4066	2014-10-02 09:24:00	65
141.049	37.2456	19.8493	2014-10-02 10:17:00	110
141.092	37.3833	6.70736	2014-10-03 07:49:00	57
141.058	37.3833	4.94135	2014-10-03 08:16:00	29
141.05	37.3833	4.68825	2014-10-03 08:24:00	570
141.042	37.3833	4.54142	2014-10-03 08:39:00	120
141.065	37.5557	14.8733	2014-10-08 09:16:00	5.1
141.075	37.5032	9.47525	2014-10-08 09:52:00	220
141.034	37.3263	10.843	2014-10-08 10:00:00	72
141.073	37.4195	3.36205	2014-10-08 10:24:00	49
141.024	37.2474	19.6406	2014-10-08 16:10:00	70
141.082	37.4605	5.76317	2014-10-09 05:49:00	5.5
141.085	37.432	4.44142	2014-10-09 06:12:00	37
141.076	37.3861	5.53038	2014-10-19 06:29:00	6.1
141.049	37.3135	12.3228	2014-10-19 09:00:00	230
141.041	37.2672	17.417	2014-10-19 09:18:00	230
141.042	37.642	24.243	2014-10-20	2.4
141.052	37.6414	24.2185	2014-10-20	4.6
141.033	37.6422	24.2575	2014-10-20	18
141.046	37.5883	18.2979	2014-10-24 05:57:00	10
141.073	37.5557	15.0089	2014-10-24 06:24:00	24
141.155	37.4102	10.6603	2014-10-27 05:21:00	6.1
141.149	37.3506	12.9215	2014-10-27 06:19:00	270
141.25	37.3833	19.4721	2014-10-27 07:59:00	67
141.2	37.3833	15.2127	2014-10-27 08:33:00	55
141.167	37.3833	12.4331	2014-10-27 08:48:00	44
141.025	37.2383	20.6404	2014-10-27 09:47:00	51
141.234	37.5192	20.4458	2014-10-29 06:00:00	41
141.217	37.5367	20.3583	2014-10-29 06:40:00	6.2
141.042	37.642	24.243	2014-11-04	8.4
141.052	37.6414	24.2185	2014-11-04	8.5
141.033	37.6422	24.2575	2014-11-04	28
141.034	37.3263	10.843	2014-11-04 10:20:00	50
141.024	37.2474	19.6406	2014-11-04 16:20:00	130
141.047	37.6448	24.5649	2014-11-05 06:20:00	3.2
141.057	37.3853	4.704	2014-11-10	81
141.059	37.4578	4.29753	2014-11-10	240
141.042	37.5517	14.2084	2014-11-11 08:43:00	22
141.05	37.5517	14.2559	2014-11-11 08:53:00	10
141.065	37.5557	14.8733	2014-11-11 08:57:00	5.1
141.058	37.4583	4.32851	2014-11-11 09:20:00	79
141.05	37.4583	4.03747	2014-11-11 09:28:00	61
141.042	37.4583	3.86618	2014-11-11 09:35:00	180
141.075	37.5032	9.47525	2014-11-11 09:40:00	500
141.073	37.4195	3.36205	2014-11-11 10:10:00	83
141.25	37.3833	19.4721	2014-11-12 08:29:00	57
141.201	37.4189	14.6461	2014-11-12 08:32:00	130
141.2	37.3833	15.2127	2014-11-12 09:05:00	120
141.167	37.3833	12.4331	2014-11-12 09:21:00	8.2
141.075	37.3356	10.4066	2014-11-12 09:38:00	36
141.049	37.2456	19.8493	2014-11-12 10:19:00	37
141.025	37.2383	20.6404	2014-11-12 10:27:00	150
141.085	37.432	4.44142	2014-11-13 05:49:00	41
141.082	37.4605	5.76317	2014-11-13 06:11:00	6.5
141.373	37.415	29.84	2014-11-17	43
141.234	37.5192	20.4458	2014-11-18 06:24:00	81
141.217	37.5367	20.3583	2014-11-18 07:13:00	7.8
141.2	37.235	25.5303	2014-11-19 07:38:00	41
141.092	37.3833	6.70736	2014-11-19 07:50:00	46
141.058	37.3833	4.94135	2014-11-19 08:05:00	38
141.05	37.3833	4.68825	2014-11-19 08:15:00	810
141.042	37.3833	4.54142	2014-11-19 08:26:00	550
141.073	37.5557	15.0089	2014-11-20 05:52:00	16
141.046	37.5883	18.2979	2014-11-20 06:18:00	23
141.155	37.4102	10.6603	2014-11-25 06:05:00	8.5
141.149	37.3506	12.9215	2014-11-25 06:50:00	13
141.076	37.3861	5.53038	2014-11-29 07:04:00	5.9
141.024	37.2474	19.6406	2014-12-02 16:10:00	130
141.042	37.642	24.243	2014-12-04	4.9
141.052	37.6414	24.2185	2014-12-04	7.7
141.033	37.6422	24.2575	2014-12-04	41
141.085	37.432	4.44142	2014-12-04 06:04:00	73
141.082	37.4605	5.76317	2014-12-04 06:35:00	6.7
141.201	37.4189	14.6461	2014-12-04 08:31:00	79
141.075	37.3356	10.4066	2014-12-04 10:23:00	19
141.049	37.2456	19.8493	2014-12-04 11:02:00	33
141.026	37.3228	11.2655	2014-12-09	71
141.026	37.3106	12.6222	2014-12-09	130
141.034	37.3263	10.843	2014-12-09 10:10:00	72
141.025	37.2383	20.6404	2014-12-10 07:25:00	210
141.167	37.3833	12.4331	2014-12-10 08:33:00	13
141.2	37.3833	15.2127	2014-12-10 08:56:00	52
141.25	37.3833	19.4721	2014-12-10 09:27:00	59
141.049	37.3135	12.3228	2014-12-11 08:20:00	53
141.041	37.2672	17.417	2014-12-11 09:18:00	230
141.092	37.3833	6.70736	2014-12-15 07:51:00	31
141.058	37.3833	4.94135	2014-12-15 08:07:00	39
141.05	37.3833	4.68825	2014-12-15 08:17:00	110
141.042	37.3833	4.54142	2014-12-15 08:27:00	450
141.234	37.5192	20.4458	2014-12-16 06:17:00	9.8
141.217	37.5367	20.3583	2014-12-16 07:07:00	17
141.065	37.5557	14.8733	2014-12-16 08:34:00	13
141.075	37.5032	9.47525	2014-12-16 09:06:00	21
141.073	37.4195	3.36205	2014-12-16 09:35:00	47
141.076	37.3861	5.53038	2014-12-19 06:06:00	8.8
141.073	37.5557	15.0089	2014-12-19 06:08:00	9.4
141.046	37.5883	18.2979	2014-12-19 06:40:00	16
141.042	37.5517	14.2084	2014-12-24 08:24:00	21
141.05	37.5517	14.2559	2014-12-24 08:37:00	25
141.058	37.4583	4.32851	2014-12-24 09:09:00	90
141.05	37.4583	4.03747	2014-12-24 09:20:00	120
141.042	37.4583	3.86618	2014-12-24 09:30:00	210
141.155	37.4102	10.6603	2014-12-25 05:21:00	6.6
141.149	37.3506	12.9215	2014-12-25 06:09:00	33
141.25	37.3833	19.4721	2015-01-05 08:10:00	49
141.201	37.4189	14.6461	2015-01-05 08:20:00	60
141.2	37.3833	15.2127	2015-01-05 08:33:00	60
141.167	37.3833	12.4331	2015-01-05 09:17:00	15
141.025	37.2383	20.6404	2015-01-05 10:09:00	84
141.075	37.3356	10.4066	2015-01-05 10:20:00	28
141.049	37.2456	19.8493	2015-01-05 10:27:00	80
141.073	37.4195	3.36205	2015-01-06 07:08:00	560
141.2	37.235	25.5303	2015-01-06 07:12:00	45
141.075	37.5032	9.47525	2015-01-06 07:36:00	85
141.065	37.5557	14.8733	2015-01-06 08:12:00	4.8
141.034	37.3263	10.843	2015-01-06 09:30:00	90
141.024	37.2474	19.6406	2015-01-06 10:30:00	190
141.092	37.3833	6.70736	2015-01-08 08:21:00	80
141.058	37.3833	4.94135	2015-01-08 08:41:00	56
141.05	37.3833	4.68825	2015-01-08 08:51:00	140
141.042	37.3833	4.54142	2015-01-08 09:02:00	620
141.05	37.5517	14.2559	2015-01-08 09:15:00	12
141.042	37.5517	14.2084	2015-01-08 09:30:00	6.8
141.042	37.4583	3.86618	2015-01-08 10:10:00	22
141.05	37.4583	4.03747	2015-01-08 10:17:00	54
141.058	37.4583	4.32851	2015-01-08 10:25:00	41
141.155	37.4102	10.6603	2015-01-11 06:06:00	5.4
141.049	37.3135	12.3228	2015-01-11 06:38:00	140
141.149	37.3506	12.9215	2015-01-11 06:55:00	27
141.041	37.2672	17.417	2015-01-11 07:05:00	18
141.047	37.6448	24.5649	2015-01-14 06:15:00	2.9
141.052	37.6414	24.2185	2015-01-19	5
141.042	37.642	24.243	2015-01-19	5.9
141.231	37.5825	24.6368	2015-01-19	5.9
141.033	37.6422	24.2575	2015-01-19	31
141.362	37.4198	28.7983	2015-01-19	90
141.134	37.5824	19.6265	2015-01-19	ND	10
141.076	37.3861	5.53038	2015-01-25 07:01:00	68
141.073	37.5557	15.0089	2015-01-27 06:13:00	9.1
141.082	37.4605	5.76317	2015-01-27 06:23:00	4.8
141.046	37.5883	18.2979	2015-01-27 06:34:00	10
141.085	37.432	4.44142	2015-01-27 06:57:00	120
141.234	37.5192	20.4458	2015-01-30 06:36:00	120
141.217	37.5367	20.3583	2015-01-30 07:11:00	9.2
141.034	37.3263	10.843	2015-02-03 10:15:00	87
141.024	37.2474	19.6406	2015-02-03 11:10:00	71
141.042	37.4583	3.86618	2015-02-04 08:08:00	30
141.092	37.3833	6.70736	2015-02-04 08:09:00	1800
141.05	37.4583	4.03747	2015-02-04 08:17:00	110
141.058	37.4583	4.32851	2015-02-04 08:28:00	34
141.058	37.3833	4.94135	2015-02-04 08:30:00	47
141.05	37.3833	4.68825	2015-02-04 08:42:00	170
141.042	37.3833	4.54142	2015-02-04 08:53:00	410
141.042	37.5517	14.2084	2015-02-04 08:59:00	12
141.05	37.5517	14.2559	2015-02-04 09:09:00	23
141.25	37.3833	19.4721	2015-02-05 08:21:00	48
141.2	37.3833	15.2127	2015-02-05 09:03:00	70
141.167	37.3833	12.4331	2015-02-05 09:19:00	75
141.025	37.2383	20.6404	2015-02-05 10:27:00	360
141.373	37.415	29.84	2015-02-06	56
141.076	37.3861	5.53038	2015-02-08 06:48:00	5.8
141.057	37.3853	4.704	2015-02-10	37
141.059	37.4578	4.29753	2015-02-10	49
141.049	37.2456	19.8493	2015-02-10 07:39:00	170
141.075	37.3356	10.4066	2015-02-10 08:15:00	48
141.201	37.4189	14.6461	2015-02-10 08:38:00	89
141.073	37.4195	3.36205	2015-02-10 08:59:00	40
141.065	37.5557	14.8733	2015-02-10 09:52:00	42
141.075	37.5032	9.47525	2015-02-10 10:32:00	560
141.049	37.3135	12.3228	2015-02-12 04:21:00	32
141.041	37.2672	17.417	2015-02-12 04:47:00	13
141.042	37.642	24.243	2015-02-17	4.4
141.052	37.6414	24.2185	2015-02-17	4.7
141.033	37.6422	24.2575	2015-02-17	21
141.085	37.432	4.44142	2015-02-24 06:40:00	8.6
141.082	37.4605	5.76317	2015-02-24 07:06:00	17
141.026	37.3228	11.2655	2015-02-25	93
141.026	37.3106	12.6222	2015-02-25	180
141.234	37.5192	20.4458	2015-02-25 06:13:00	120
141.217	37.5367	20.3583	2015-02-25 06:54:00	7.9
141.073	37.5557	15.0089	2015-02-26 05:34:00	5.5
141.046	37.5883	18.2979	2015-02-26 06:00:00	7.4
141.201	37.4189	14.6461	2015-03-03 08:24:00	130
141.065	37.5557	14.8733	2015-03-03 08:32:00	8
141.075	37.5032	9.47525	2015-03-03 09:04:00	8.9
141.075	37.3356	10.4066	2015-03-03 09:35:00	26
141.073	37.4195	3.36205	2015-03-03 09:59:00	55
141.049	37.2456	19.8493	2015-03-03 10:17:00	63
141.024	37.2474	19.6406	2015-03-03 14:50:00	56
141.052	37.6414	24.2185	2015-03-05	6.2
141.033	37.6422	24.2575	2015-03-05	26
141.042	37.642	24.243	2015-03-05	93
141.058	37.4583	4.32851	2015-03-06 08:11:00	55
141.05	37.4583	4.03747	2015-03-06 08:22:00	46
141.042	37.4583	3.86618	2015-03-06 08:30:00	130
141.042	37.5517	14.2084	2015-03-06 09:02:00	10
141.092	37.3833	6.70736	2015-03-06 09:05:00	2200
141.05	37.5517	14.2559	2015-03-06 09:10:00	12
141.034	37.3263	10.843	2015-03-06 09:20:00	65
141.058	37.3833	4.94135	2015-03-06 09:20:00	380
141.05	37.3833	4.68825	2015-03-06 09:36:00	150
141.042	37.3833	4.54142	2015-03-06 09:46:00	640
141.049	37.3135	12.3228	2015-03-12 06:14:00	51
141.047	37.6448	24.5649	2015-03-12 06:25:00	2.4
141.041	37.2672	17.417	2015-03-12 06:36:00	44
141.076	37.3861	5.53038	2015-03-14 06:41:00	7.7
141.25	37.3833	19.4721	2015-03-17 07:59:00	42
141.2	37.3833	15.2127	2015-03-17 08:18:00	73
141.167	37.3833	12.4331	2015-03-17 08:52:00	19
141.025	37.2383	20.6404	2015-03-17 09:46:00	100
141.234	37.5192	20.4458	2015-03-18 06:18:00	23
141.217	37.5367	20.3583	2015-03-18 06:45:00	6.9
141.085	37.432	4.44142	2015-03-19 05:51:00	4.2
141.073	37.5557	15.0089	2015-03-19 05:57:00	16
141.082	37.4605	5.76317	2015-03-19 06:20:00	20
141.046	37.5883	18.2979	2015-03-19 06:25:00	7.3
141.155	37.4102	10.6603	2015-03-22 05:48:00	3.7
141.149	37.3506	12.9215	2015-03-22 06:37:00	33
141.2	37.235	25.5303	2015-03-27 07:34:00	72
141.052	37.6414	24.2185	2015-04-06	2.3
141.042	37.642	24.243	2015-04-06	3.4
141.033	37.6422	24.2575	2015-04-06	25
141.092	37.3833	6.70736	2015-04-06 08:01:00	4.6
141.058	37.3833	4.94135	2015-04-06 08:15:00	19
141.05	37.3833	4.68825	2015-04-06 08:26:00	93
141.042	37.3833	4.54142	2015-04-06 08:39:00	100
141.05	37.5517	14.2559	2015-04-06 08:55:00	7.8
141.042	37.5517	14.2084	2015-04-06 09:07:00	18
141.058	37.4583	4.32851	2015-04-06 09:40:00	62
141.05	37.4583	4.03747	2015-04-06 09:48:00	57
141.042	37.4583	3.86618	2015-04-06 09:55:00	14
141.034	37.3263	10.843	2015-04-07 10:00:00	120
141.024	37.2474	19.6406	2015-04-07 11:00:00	120
141.082	37.4605	5.76317	2015-04-08 05:58:00	19
141.085	37.432	4.44142	2015-04-08 06:29:00	110
141.049	37.3135	12.3228	2015-04-12 06:39:00	110
141.041	37.2672	17.417	2015-04-12 07:24:00	29
141.201	37.4189	14.6461	2015-04-13 08:08:00	70
141.075	37.3356	10.4066	2015-04-13 08:57:00	27
141.049	37.2456	19.8493	2015-04-13 09:44:00	6.4
141.25	37.3833	19.4721	2015-04-16 08:10:00	54
141.065	37.5557	14.8733	2015-04-16 08:30:00	350
141.2	37.3833	15.2127	2015-04-16 08:44:00	44
141.075	37.5032	9.47525	2015-04-16 09:04:00	15
141.167	37.3833	12.4331	2015-04-16 09:12:00	13
141.073	37.4195	3.36205	2015-04-16 09:58:00	270
141.025	37.2383	20.6404	2015-04-16 10:21:00	58
141.076	37.3861	5.53038	2015-04-19 06:33:00	13
141.046	37.5883	18.2979	2015-04-23 05:31:00	6.7
141.155	37.4102	10.6603	2015-04-24 04:57:00	4.7
141.149	37.3506	12.9215	2015-04-24 05:31:00	8.1
141.234	37.5192	20.4458	2015-04-28 06:14:00	14
141.217	37.5367	20.3583	2015-04-28 06:47:00	5.9
141.034	37.3263	10.843	2015-05-07 13:50:00	110
141.024	37.2474	19.6406	2015-05-07 14:50:00	170
141.092	37.3833	6.70736	2015-05-08 08:09:00	140
141.058	37.3833	4.94135	2015-05-08 08:21:00	30
141.05	37.3833	4.68825	2015-05-08 08:29:00	140
141.042	37.3833	4.54142	2015-05-08 08:41:00	320
141.05	37.5517	14.2559	2015-05-08 08:53:00	9
141.042	37.5517	14.2084	2015-05-08 09:03:00	11
141.042	37.4583	3.86618	2015-05-08 09:36:00	94
141.05	37.4583	4.03747	2015-05-08 09:43:00	84
141.058	37.4583	4.32851	2015-05-08 09:52:00	43
141.076	37.3861	5.53038	2015-05-10 06:28:00	53
141.075	37.5032	9.47525	2015-05-11 08:12:00	79
141.201	37.4189	14.6461	2015-05-11 08:21:00	63
141.065	37.5557	14.8733	2015-05-11 08:57:00	540
141.073	37.4195	3.36205	2015-05-11 09:17:00	15
141.075	37.3356	10.4066	2015-05-11 09:56:00	21
141.049	37.2456	19.8493	2015-05-11 10:38:00	26
141.042	37.642	24.243	2015-05-14	2.3
141.052	37.6414	24.2185	2015-05-14	5.4
141.033	37.6422	24.2575	2015-05-14	27
141.373	37.415	29.84	2015-05-14	45
141.049	37.3135	12.3228	2015-05-14 06:10:00	140
141.041	37.2672	17.417	2015-05-14 06:32:00	6.5
141.085	37.432	4.44142	2015-05-19 05:59:00	17
141.082	37.4605	5.76317	2015-05-19 06:26:00	25
141.046	37.5883	18.2979	2015-05-21 05:38:00	6.7
141.047	37.6448	24.5649	2015-05-21 06:46:00	3.8
141.155	37.4102	10.6603	2015-05-22 04:34:00	9.2
141.149	37.3506	12.9215	2015-05-22 05:23:00	10
141.234	37.5192	20.4458	2015-05-26 06:14:00	170
141.217	37.5367	20.3583	2015-05-26 06:55:00	8.5
141.2	37.235	25.5303	2015-05-27 07:28:00	42
141.25	37.3833	19.4721	2015-05-27 08:35:00	91
141.2	37.3833	15.2127	2015-05-27 08:55:00	79
141.167	37.3833	12.4331	2015-05-27 09:11:00	36
141.025	37.2383	20.6404	2015-05-27 10:17:00	120
141.052	37.6414	24.2185	2015-06-01	4.6
141.033	37.6422	24.2575	2015-06-01	25
141.042	37.642	24.243	2015-06-01	26
141.075	37.5032	9.47525	2015-06-01 07:47:00	120
141.201	37.4189	14.6461	2015-06-01 07:54:00	81
141.065	37.5557	14.8733	2015-06-01 08:23:00	7.3
141.073	37.4195	3.36205	2015-06-01 08:52:00	14
141.075	37.3356	10.4066	2015-06-01 09:26:00	23
141.049	37.2456	19.8493	2015-06-01 10:01:00	50
141.092	37.3833	6.70736	2015-06-02 08:01:00	2500
141.058	37.4583	4.32851	2015-06-02 08:13:00	260
141.058	37.3833	4.94135	2015-06-02 08:17:00	60
141.05	37.4583	4.03747	2015-06-02 08:23:00	19
141.05	37.3833	4.68825	2015-06-02 08:26:00	550
141.042	37.4583	3.86618	2015-06-02 08:32:00	130
141.042	37.3833	4.54142	2015-06-02 08:35:00	150
141.042	37.5517	14.2084	2015-06-02 09:07:00	8.7
141.05	37.5517	14.2559	2015-06-02 09:15:00	5.3
141.034	37.3263	10.843	2015-06-02 10:00:00	100
141.024	37.2474	19.6406	2015-06-02 11:10:00	89
141.25	37.3833	19.4721	2015-06-03 08:05:00	60
141.2	37.3833	15.2127	2015-06-03 08:42:00	93
141.167	37.3833	12.4331	2015-06-03 08:58:00	28
141.025	37.2383	20.6404	2015-06-03 10:09:00	130
141.049	37.3135	12.3228	2015-06-04 05:10:00	160
141.041	37.2672	17.417	2015-06-04 05:34:00	7.9
141.076	37.3861	5.53038	2015-06-07 06:26:00	22
141.085	37.432	4.44142	2015-06-09 06:22:00	34
141.082	37.4605	5.76317	2015-06-09 06:51:00	6.5
141.046	37.5883	18.2979	2015-06-10 05:42:00	8.9
141.234	37.5192	20.4458	2015-06-12 06:16:00	33
141.217	37.5367	20.3583	2015-06-12 06:48:00	26
141.155	37.4102	10.6603	2015-06-16 04:54:00	5.1
141.149	37.3506	12.9215	2015-06-16 05:43:00	18
141.049	37.3135	12.3228	2015-07-02 04:16:00	180
141.041	37.2672	17.417	2015-07-02 04:39:00	300
141.134	37.5824	19.6265	2015-07-06	2
141.231	37.5825	24.6368	2015-07-06	4.9
141.362	37.4198	28.7983	2015-07-06	67
141.073	37.4195	3.36205	2015-07-06 07:53:00	25
141.201	37.4189	14.6461	2015-07-06 08:22:00	64
141.075	37.5032	9.47525	2015-07-06 08:29:00	220
141.065	37.5557	14.8733	2015-07-06 09:03:00	4.8
141.075	37.3356	10.4066	2015-07-06 09:29:00	41
141.049	37.2456	19.8493	2015-07-06 10:31:00	57
141.042	37.642	24.243	2015-07-07	3.1
141.052	37.6414	24.2185	2015-07-07	6.7
141.033	37.6422	24.2575	2015-07-07	17
141.082	37.4605	5.76317	2015-07-07 06:19:00	6
141.085	37.432	4.44142	2015-07-07 06:44:00	32
141.034	37.3263	10.843	2015-07-07 09:50:00	81
141.024	37.2474	19.6406	2015-07-07 11:50:00	110
141.046	37.5883	18.2979	2015-07-08 05:22:00	9.3
141.234	37.5192	20.4458	2015-07-10 06:28:00	25
141.217	37.5367	20.3583	2015-07-10 07:13:00	16
141.076	37.3861	5.53038	2015-07-12 06:28:00	15
141.155	37.4102	10.6603	2015-07-14 04:55:00	6.9
141.149	37.3506	12.9215	2015-07-14 05:45:00	32
141.047	37.6448	24.5649	2015-07-15 06:00:00	ND	2.4
141.092	37.3833	6.70736	2015-07-23 07:59:00	2100
141.042	37.4583	3.86618	2015-07-23 08:01:00	220
141.05	37.4583	4.03747	2015-07-23 08:08:00	88
141.058	37.3833	4.94135	2015-07-23 08:18:00	15
141.058	37.4583	4.32851	2015-07-23 08:18:00	46
141.05	37.3833	4.68825	2015-07-23 08:34:00	380
141.042	37.3833	4.54142	2015-07-23 08:47:00	440
141.042	37.5517	14.2084	2015-07-23 08:48:00	11
141.05	37.5517	14.2559	2015-07-23 08:54:00	18
141.25	37.3833	19.4721	2015-07-24 08:09:00	34
141.2	37.235	25.5303	2015-07-24 08:15:00	42
141.2	37.3833	15.2127	2015-07-24 08:52:00	70
141.167	37.3833	12.4331	2015-07-24 09:23:00	72
141.025	37.2383	20.6404	2015-07-24 10:22:00	71
141.042	37.642	24.243	2015-08-03	2.2
141.052	37.6414	24.2185	2015-08-03	6.1
141.033	37.6422	24.2575	2015-08-03	15
141.373	37.415	29.84	2015-08-09	31
141.049	37.2456	19.8493	2015-09-01 07:17:00	25
141.073	37.4195	3.36205	2015-09-01 07:47:00	55
141.075	37.3356	10.4066	2015-09-01 08:04:00	190
141.075	37.5032	9.47525	2015-09-01 08:19:00	9.3
141.065	37.5557	14.8733	2015-09-01 08:51:00	6.9
141.201	37.4189	14.6461	2015-09-01 09:18:00	1800
141.049	37.3135	12.3228	2015-09-02 06:15:00	360
141.041	37.2672	17.417	2015-09-02 06:42:00	12
141.034	37.3263	10.843	2015-09-02 09:45:00	140
141.024	37.2474	19.6406	2015-09-02 10:40:00	92
141.155	37.4102	10.6603	2015-09-04 05:18:00	4.8
141.149	37.3506	12.9215	2015-09-04 06:00:00	21
141.076	37.3861	5.53038	2015-09-13 06:47:00	8.2
141.046	37.5883	18.2979	2015-09-16 05:49:00	38
141.217	37.5367	20.3583	2015-09-16 06:09:00	24
141.234	37.5192	20.4458	2015-09-16 06:40:00	17
141.082	37.4605	5.76317	2015-09-17 06:03:00	7
141.047	37.6448	24.5649	2015-09-17 06:15:00	5.7
141.085	37.432	4.44142	2015-09-17 06:25:00	14
141.2	37.235	25.5303	2015-09-25 07:38:00	71
141.092	37.3833	6.70736	2015-09-25 07:42:00	140
141.25	37.3833	19.4721	2015-09-25 07:59:00	84
141.058	37.3833	4.94135	2015-09-25 08:14:00	67
141.05	37.3833	4.68825	2015-09-25 08:27:00	230
141.2	37.3833	15.2127	2015-09-25 08:33:00	73
141.042	37.3833	4.54142	2015-09-25 08:42:00	360
141.167	37.3833	12.4331	2015-09-25 08:47:00	130
141.025	37.2383	20.6404	2015-09-25 09:30:00	230
141.05	37.5517	14.2559	2015-09-30 08:22:00	68
141.042	37.5517	14.2084	2015-09-30 08:35:00	50
141.058	37.4583	4.32851	2015-09-30 09:05:00	72
141.05	37.4583	4.03747	2015-09-30 09:16:00	96
141.042	37.4583	3.86618	2015-09-30 09:27:00	80
141.05	37.5517	14.2559	2015-10-05 08:09:00	46
141.042	37.5517	14.2084	2015-10-05 08:18:00	60
141.058	37.4583	4.32851	2015-10-05 08:51:00	240
141.05	37.4583	4.03747	2015-10-05 09:01:00	210
141.042	37.4583	3.86618	2015-10-05 09:11:00	76
141.034	37.3263	10.843	2015-10-06 09:50:00	86
141.024	37.2474	19.6406	2015-10-06 12:00:00	110
141.065	37.5557	14.8733	2015-10-13 08:36:00	9.3
141.075	37.5032	9.47525	2015-10-13 09:12:00	860
141.073	37.4195	3.36205	2015-10-13 09:38:00	20
141.201	37.4189	14.6461	2015-10-14 08:05:00	68
141.25	37.3833	19.4721	2015-10-14 08:14:00	80
141.2	37.3833	15.2127	2015-10-14 08:50:00	76
141.075	37.3356	10.4066	2015-10-14 09:14:00	270
141.167	37.3833	12.4331	2015-10-14 09:17:00	9.1
141.049	37.2456	19.8493	2015-10-14 10:06:00	92
141.025	37.2383	20.6404	2015-10-14 10:18:00	67
141.049	37.3135	12.3228	2015-10-15 06:25:00	260
141.041	37.2672	17.417	2015-10-15 06:49:00	16
141.092	37.3833	6.70736	2015-10-16 07:53:00	2000
141.058	37.3833	4.94135	2015-10-16 08:10:00	220
141.05	37.3833	4.68825	2015-10-16 08:26:00	240
141.042	37.3833	4.54142	2015-10-16 08:35:00	260
141.076	37.3861	5.53038	2015-10-18 06:30:00	36
141.155	37.4102	10.6603	2015-10-20 05:22:00	40
141.046	37.5883	18.2979	2015-10-20 06:05:00	6.9
141.149	37.3506	12.9215	2015-10-20 06:08:00	40
141.217	37.5367	20.3583	2015-10-23 06:06:00	13
141.234	37.5192	20.4458	2015-10-23 06:50:00	15
141.082	37.4605	5.76317	2015-10-27 06:01:00	29
141.085	37.432	4.44142	2015-10-27 06:18:00	50

## Sheet: Seawater_OffshoreBox
SELECT	Limit to…	Long E, °dec	lat N, °dec
	min (SW corner)	141.6	35.3
	max (NE corner)	144.5	38.6	Seawater, Bq/L
Long E, °dec	lat N, °dec	Dist. FDNPP, Km	Date Smpl	Cs-137	< DL
143.778	35.688	310.212	2011-03-31	0.546	0.028
142.027	36.1567	166.229	2011-04-14 13:30:00	0.009	0.001
142.72	37.0917	153.551	2011-04-14 17:38:00	0.117	0.004
143.308	37.8617	206.82	2011-04-14 21:35:00	0.284	0.005
143.785	38.21	258.403	2011-04-15 09:00:00	0.148	0.005
143.083	38.1133	196.68	2011-04-16 00:08:00	0.174	0.005
141.8	35.55	219.454	2011-04-27	<	0.12
141.87	36.52	124.921	2011-04-28	<	0.12
142.67	37.18	147.129	2011-04-29	0.28	0.09
142.83	38.4	192.311	2011-04-29	0.29	0.09
143.03	38.15	194.01	2011-04-29	<	0.12
143.48	38.27	235.79	2011-04-30	0.27	0.09
143.78	38.22	258.367	2011-04-30	<	0.12
141.997	35.9983	180.178	2011-05-22 17:59:00	15
144	38.002	269.936	2011-06-09 21:59:00	0.0334	0.0021
144	38.002	269.936	2011-06-09 21:59:00	0.0334	0.0021
144	38.002	269.936	2011-06-09 21:59:00	0.0601	0.0039
144	38.002	269.936	2011-06-09 21:59:00	0.0601	0.0039
144	38.002	269.936	2011-06-09 21:59:00	0.0638	0.0035
144	38.002	269.936	2011-06-09 21:59:00	0.0638	0.0035
144	38.002	269.936	2011-06-09 21:59:00	0.1736	0.0099
144.424	38.0008	306.432	2011-06-10 04:11:00	0.16
144	36.999	266.43	2011-06-10 09:08:00	0.0219	0.0012
144	36.999	266.43	2011-06-10 09:08:00	0.0219	0.0012
144	36.999	266.43	2011-06-10 09:08:00	0.0252	0.0013
144	36.999	266.43	2011-06-10 09:08:00	0.0252	0.0013
144	36.999	266.43	2011-06-10 09:08:00	0.1299	0.0078
144	36.999	266.43	2011-06-10 09:08:00	0.1299	0.0078
144	37.5616	262.599	2011-06-10 12:10:00	0.142
144.001	37.5072	262.442	2011-06-10 13:20:00	0.082
144.006	37.5131	262.881	2011-06-10 13:50:00	0.21
144.026	37.516	264.642	2011-06-10 14:20:00	0.217
144.024	36.487	284.181	2011-06-10 15:12:00	0.0007	0.0001
144.024	36.487	284.181	2011-06-10 15:12:00	0.0007	0.0001
144.024	36.487	284.181	2011-06-10 15:12:00	0.0012	0.0001
144.024	36.487	284.181	2011-06-10 15:12:00	0.0012	0.0001
144.024	36.487	284.181	2011-06-10 15:12:00	0.0014	0.0002
144.024	36.487	284.181	2011-06-10 15:12:00	0.0014	0.0002
144.024	36.487	284.181	2011-06-10 15:12:00	0.0016	0.0002
144.024	36.487	284.181	2011-06-10 15:12:00	0.0016	0.0002
144.024	36.487	284.181	2011-06-10 15:12:00	0.0022	0.0003
144.024	36.487	284.181	2011-06-10 15:12:00	0.0022	0.0003
144.024	36.487	284.181	2011-06-10 15:12:00	0.0027	0.0002
144.024	36.487	284.181	2011-06-10 15:12:00	0.0027	0.0002
144.024	36.487	284.181	2011-06-10 15:12:00	0.0036	0.0004
144.024	36.487	284.181	2011-06-10 15:12:00	0.0036	0.0004
144.014	37.1979	264.614	2011-06-10 16:50:00	0.086
144.006	36.9953	267.043	2011-06-10 19:00:00	0.137
144.005	35.997	306.996	2011-06-10 20:44:00	0.0023	0.0006
144.005	35.997	306.996	2011-06-10 20:44:00	0.0023	0.0006
144.005	35.997	306.996	2011-06-10 20:44:00	0.0024	0.0004
144.005	35.997	306.996	2011-06-10 20:44:00	0.0024	0.0003
144.005	35.997	306.996	2011-06-10 20:44:00	0.0024	0.0003
144.005	35.997	306.996	2011-06-10 20:44:00	0.0028	0.0004
144.005	35.997	306.996	2011-06-10 20:44:00	0.0028	0.0004
143.994	36.902	268.019	2011-06-10 21:20:00	0.22
143.998	36.5636	279.024	2011-06-10 23:30:00	0.02
144.157	36.4156	298.064	2011-06-11 02:00:00		0.176
144.142	36.3296	300.592	2011-06-11 02:50:00		0.144
144.093	36.2326	301.247	2011-06-11 03:40:00	0.031
144.019	35.9816	308.944	2011-06-11 06:20:00	0.088
144.049	35.6795	329.879	2011-06-11 10:10:00	0.18
144.021	35.5858	334.115	2011-06-11 11:00:00	0.212
144.003	35.5223	337.296	2011-06-11 13:40:00	0.102
143.996	35.4301	343.331	2011-06-11 16:00:00	0.146
143.925	35.6186	325.192	2011-06-11 18:20:00	0.204
143	36.5	201.984	2011-06-11 19:43:00	0.0019	0.0004
143	36.5	201.984	2011-06-11 19:43:00	0.0019	0.0004
143	36.5	201.984	2011-06-11 19:43:00	0.0024	0.0003
143	36.5	201.984	2011-06-11 19:43:00	0.0024	0.0003
143	36.5	201.984	2011-06-11 19:43:00	0.0034	0.0003
143	36.5	201.984	2011-06-11 19:43:00	0.0097	0.0008
143	36.5	201.984	2011-06-11 19:43:00	0.0097	0.0008
143.845	35.8766	302.443	2011-06-11 20:50:00	0.166
143.572	36.1138	267.636	2011-06-12	0.146
143.409	36.2495	247.354	2011-06-12 01:30:00	0.101
143.349	36.2942	240.231	2011-06-12 02:00:00	0.161
143.051	36.4746	207.313	2011-06-12 04:20:00	0.071
143.11	36.5543	207.493	2011-06-12 07:00:00	0.072
142.998	37.494	173.752	2011-06-12 07:15:00	0.0032	0.0003
142.998	37.494	173.752	2011-06-12 07:15:00	0.0032	0.0003
142.998	37.494	173.752	2011-06-12 07:15:00	0.019	0.001
142.998	37.494	173.752	2011-06-12 07:15:00	0.019	0.001
142.998	37.494	173.752	2011-06-12 07:15:00	0.202	0.011
142.998	37.494	173.752	2011-06-12 07:15:00	0.202	0.011
142.998	37.494	173.752	2011-06-12 07:15:00	0.243	0.013
142.998	37.494	173.752	2011-06-12 07:15:00	0.296	0.016
142.998	37.494	173.752	2011-06-12 07:15:00	0.296	0.016
143.128	36.563	208.478	2011-06-12 07:50:00	0.11
143.002	36.9705	181.178	2011-06-12 11:00:00	0.225
142.957	37.545	170.482	2011-06-12 12:35:00	0.0009	0.0001
142.957	37.545	170.482	2011-06-12 12:35:00	0.0009	0.0001
142.957	37.545	170.482	2011-06-12 12:35:00	0.0022	0.0002
142.957	37.545	170.482	2011-06-12 12:35:00	0.0022	0.0002
142.957	37.545	170.482	2011-06-12 12:35:00	0.0113	0.0008
142.957	37.545	170.482	2011-06-12 12:35:00	0.0113	0.0008
142.998	37.1715	175.833	2011-06-12 14:20:00	0.371
142.992	37.5071	173.266	2011-06-12 17:00:00	0.403
142.959	37.5434	170.609	2011-06-12 20:00:00	0.446
142.955	37.5483	170.326	2011-06-12 22:00:00	0.408
142.965	37.5336	171.136	2011-06-13	0.384
142.502	37.501	130.003	2011-06-13 00:50:00	0.002	0.0002
142.502	37.501	130.003	2011-06-13 00:50:00	0.002	0.0002
142.502	37.501	130.003	2011-06-13 00:50:00	0.054	0.003
142.502	37.501	130.003	2011-06-13 00:50:00	0.054	0.003
142.502	37.501	130.003	2011-06-13 00:50:00	0.135	0.008
142.502	37.501	130.003	2011-06-13 00:50:00	0.135	0.008
142.502	37.501	130.003	2011-06-13 00:50:00	0.223	0.012
142.502	37.501	130.003	2011-06-13 00:50:00	0.259	0.014
142.502	37.501	130.003	2011-06-13 00:50:00	0.259	0.014
143.004	37.9963	185.407	2011-06-13 04:30:00	0.388
142.914	37.8725	173.494	2011-06-13 06:40:00	0.677
142.802	37.7736	161.038	2011-06-13 07:30:00	0.529
142.505	37.498	130.246	2011-06-13 08:42:00	0.0009	0.0001
142.505	37.498	130.246	2011-06-13 08:42:00	0.0009	0.0001
142.505	37.498	130.246	2011-06-13 08:42:00	0.0009	0.0003
142.505	37.498	130.246	2011-06-13 08:42:00	0.0009	0.0003
142.505	37.498	130.246	2011-06-13 08:42:00	0.0011	0.0002
142.505	37.498	130.246	2011-06-13 08:42:00	0.0011	0.0002
142.505	37.498	130.246	2011-06-13 08:42:00	0.0022	0.0003
142.505	37.498	130.246	2011-06-13 08:42:00	0.0022	0.0003
142.498	37.5005	129.673	2011-06-13 10:00:00	0.514
142.423	37.5462	123.456	2011-06-13 15:20:00	0.424
142.412	37.5488	122.513	2011-06-13 16:30:00	0.453
142.433	37.535	124.241	2011-06-13 17:00:00	0.27
142.497	37.4991	129.522	2011-06-13 18:20:00	0.605
142.49	37.5005	128.985	2011-06-13 18:50:00	0.507
142.495	37.6672	131.888	2011-06-13 20:00:00	0.501
142.005	37.481	86.0102	2011-06-13 21:01:00	0.113	0.006
142.005	37.481	86.0102	2011-06-13 21:01:00	0.113	0.006
142.005	37.481	86.0102	2011-06-13 21:01:00	0.856	0.045
142.005	37.481	86.0102	2011-06-13 21:01:00	0.982	0.051
142.005	37.481	86.0102	2011-06-13 21:01:00	0.982	0.051
142.005	37.481	86.0102	2011-06-13 21:01:00	1.011	0.053
142.005	37.481	86.0102	2011-06-13 21:01:00	1.011	0.053
142.005	37.481	86.0102	2011-06-13 21:01:00	1.029	0.053
142.005	37.481	86.0102	2011-06-13 21:01:00	1.029	0.053
142.496	37.848	137.51	2011-06-13 21:10:00	0.381
142.496	37.848	137.51	2011-06-13 23:20:00	0.301
142.355	37.8665	126.672	2011-06-14 01:10:00	0.358
142.002	37.484	85.7707	2011-06-14 03:03:00	0.0011	0.0001
142.002	37.484	85.7707	2011-06-14 03:03:00	0.0011	0.0001
142.002	37.484	85.7707	2011-06-14 03:03:00	0.002	0.0002
142.002	37.484	85.7707	2011-06-14 03:03:00	0.002	0.0002
142.002	37.484	85.7707	2011-06-14 03:03:00	0.0031	0.0003
142.002	37.484	85.7707	2011-06-14 03:03:00	0.0031	0.0003
142.006	37.477	86.1114	2011-06-14 06:00:00	0.728
141.996	37.4931	85.37	2011-06-14 06:50:00	1.478
141.998	38.001	106.621	2011-06-14 07:44:00	0.017	0.001
141.998	38.001	106.621	2011-06-14 07:44:00	0.017	0.001
141.998	38.001	106.621	2011-06-14 07:44:00	0.044	0.002
141.998	38.001	106.621	2011-06-14 07:44:00	0.044	0.002
141.998	38.001	106.621	2011-06-14 07:44:00	0.045	0.003
141.998	38.001	106.621	2011-06-14 07:44:00	0.199	0.011
141.998	38.001	106.621	2011-06-14 07:44:00	0.199	0.011
141.981	37.4604	83.772	2011-06-14 11:00:00	1.098
141.963	37.4372	82.0632	2011-06-14 11:40:00	1.266
142.003	37.484	85.8324	2011-06-14 12:20:00	1.254
142.023	37.595	89.361	2011-06-14 13:30:00	0.984
142.024	37.6144	89.9641	2011-06-14 13:40:00	0.885
142.026	37.6793	92.0962	2011-06-14 14:10:00	1.139
142.019	37.8121	97.1483	2011-06-14 15:25:00	0.743
142.003	37.9668	104.714	2011-06-14 16:27:00	0.681
142	37.9997	106.669	2011-06-14 16:40:00	0.488
141.997	38.0003	106.49	2011-06-14 16:54:00	0.367
141.997	37.9999	106.449	2011-06-14 17:00:00	0.277
141.697	37.7404	68.2821	2011-06-14 21:22:00	0.474
142.003	36.499	134.003	2011-06-16 09:23:00	0.032	0.002
142.003	36.499	134.003	2011-06-16 09:23:00	0.032	0.002
142.003	36.499	134.003	2011-06-16 09:23:00	0.117	0.006
142.003	36.499	134.003	2011-06-16 09:23:00	0.117	0.006
142.003	36.499	134.003	2011-06-16 09:23:00	0.331	0.017
142.003	36.499	134.003	2011-06-16 09:23:00	0.331	0.017
142.003	36.499	134.003	2011-06-16 09:23:00	0.392	0.02
142.003	36.499	134.003	2011-06-16 09:23:00	0.392	0.02
142.003	36.499	134.003	2011-06-16 09:23:00	3.542	0.183
141.64	36.1763	148.963	2011-06-16 15:27:00	0.344
141.714	36.2416	144.778	2011-06-16 15:58:00	0.155
141.787	36.3156	140.279	2011-06-16 16:49:00	1.74
141.932	36.4426	135.135	2011-06-16 17:51:00	2.764
142	36.4994	133.817	2011-06-16 18:20:00	3.121
142.012	36.4979	134.607	2011-06-16 18:57:00	3.517
142.021	36.4976	135.133	2011-06-16 19:28:00	3.362
142.03	36.4966	135.739	2011-06-16 19:59:00	3.162
142.079	36.491	139.058	2011-06-16 20:30:00	0.0012	0.0001
142.079	36.491	139.058	2011-06-16 20:30:00	0.0012	0.0001
142.079	36.491	139.058	2011-06-16 20:30:00	0.014	0.001
142.079	36.491	139.058	2011-06-16 20:30:00	0.014	0.001
142.047	36.4959	136.759	2011-06-16 20:56:00	3.407
142.058	36.4944	137.541	2011-06-16 21:34:00	3.787
142.066	36.4935	138.117	2011-06-16 22:04:00	3.638
142.071	36.4931	138.443	2011-06-16 22:23:00	2.586
142.077	36.4917	138.894	2011-06-16 22:47:00	3.28
142.103	36.4597	143.086	2011-06-17 00:05:00	3.34
142.115	36.4379	145.589	2011-06-17 00:34:00	3.5
142.127	36.4149	148.226	2011-06-17 01:09:00	3.222
142.495	36.499	165.219	2011-06-17 01:37:00	0.394	0.021
142.495	36.499	165.219	2011-06-17 01:37:00	0.394	0.021
142.495	36.499	165.219	2011-06-17 01:37:00	0.463	0.024
142.495	36.499	165.219	2011-06-17 01:37:00	0.463	0.024
142.495	36.499	165.219	2011-06-17 01:37:00	0.734	0.039
142.144	36.3913	151.206	2011-06-17 01:44:00	3.252
142.156	36.3659	154.079	2011-06-17 02:19:00	2.852
142.166	36.3256	158.053	2011-06-17 03:21:00	2.311
142.127	36.4124	148.421	2011-06-17 04:50:00	2.255
142.086	36.4791	140.454	2011-06-17 05:22:00	2.746
142.1	36.4669	142.274	2011-06-17 06:54:00	2.586
142.501	36.999	138.039	2011-06-17 07:13:00	0.415	0.021
142.501	36.999	138.039	2011-06-17 07:13:00	0.415	0.021
142.501	36.999	138.039	2011-06-17 07:13:00	0.448	0.024
142.501	36.999	138.039	2011-06-17 07:13:00	0.457	0.024
142.501	36.999	138.039	2011-06-17 07:13:00	0.457	0.024
142.227	36.4568	150.744	2011-06-17 07:56:00	1.459
142.316	36.4526	156.7	2011-06-17 08:29:00	0.13
142.49	36.4473	168.56	2011-06-17 09:40:00	0.85
142.507	36.4811	167.28	2011-06-17 10:25:00	0.819
142.509	36.4979	166.292	2011-06-17 11:26:00	1.239
142.54	36.5029	168.088	2011-06-17 12:04:00	1.283
142	36.998	97.685	2011-06-17 12:08:00	0.16	0.009
142	36.998	97.685	2011-06-17 12:08:00	0.16	0.009
142	36.998	97.685	2011-06-17 12:08:00	0.333	0.018
142	36.998	97.685	2011-06-17 12:08:00	0.519	0.027
142	36.998	97.685	2011-06-17 12:08:00	0.519	0.027
142.54	36.5029	168.088	2011-06-17 12:55:00	0.727
142.567	36.5956	163.95	2011-06-17 13:21:00	0.827
142.556	36.6668	158.794	2011-06-17 13:51:00	0.489
142.541	36.7641	152.109	2011-06-17 14:32:00	0.902
142.5	36.9941	138.161	2011-06-17 17:21:00	0.721
142.521	36.9807	140.422	2011-06-17 18:01:00	0.429
142.479	36.9785	137	2011-06-17 18:29:00	0.593
142.008	37.0011	98.1759	2011-06-17 21:01:00	0.593
141.999	36.9895	98.0337	2011-06-17 22:01:00	0.481
142.034	36.9393	103.579	2011-06-17 23:40:00	0.672
142.051	36.9214	105.89	2011-06-18 00:20:00	0.52
141.874	37.1044	82.367	2011-06-18 02:52:00	0.445
141.65	36.315	135.01	2011-06-18 10:41:00	0.859
141.703	36.1469	154.091	2011-06-18 12:02:00	0.237
141.664	35.9573	172.622	2011-06-18 13:38:00	0.12
141.667	38.3	112.323	2011-06-21 08:13:00	<	9
141.667	38.3	112.323	2011-06-21 08:24:00	<	9
141.667	38.3	112.323	2011-06-21 08:34:00	<	9
142	36	180.153	2011-07-11 07:17:00	<	9
142	36.0017	179.99	2011-07-11 07:21:00	<	9
141.998	36.665	120.071	2011-07-11 15:28:00	<	9
141.997	36.665	119.966	2011-07-11 15:32:00	<	9
142.498	36.6667	154.508	2011-07-11 17:45:00	<	9
142.5	36.6667	154.631	2011-07-11 17:50:00	<	9
142.503	37.3317	130.258	2011-07-12 07:10:00	<	9
142.503	37.3317	130.258	2011-07-12 07:14:00	<	9
142	37.3317	85.9697	2011-07-12 09:20:00	<	9
142	37.3333	85.9475	2011-07-12 09:24:00	<	9
142	38	106.696	2011-07-12 13:09:00	<	9
142	37.9983	106.585	2011-07-12 13:13:00	<	9
141.607	37.2483	54.2503	2011-07-29 06:50:00	<	9
141.608	37.2483	54.3876	2011-07-29 06:50:00	<	9
141.607	37.415	50.5753	2011-07-29 14:26:00	<	9
141.605	37.415	50.428	2011-07-29 14:26:00	<	9
141.722	37.4167	60.7382	2011-07-29 15:49:00	0.0092	0.0014
141.723	37.415	60.8887	2011-07-29 15:49:00	<	9
141.605	37.5833	53.4141	2011-07-30 06:46:00	<	9
141.605	37.5833	53.4141	2011-07-30 06:46:00	<	9
142.083	38.5	151.414	2011-07-31 05:50:00	<	9
142.085	38.4983	151.357	2011-07-31 05:50:00	<	9
141.847	38.5	139.585	2011-07-31 07:57:00	<	9
141.845	38.5	139.509	2011-07-31 07:57:00	<	9
141.845	38.5	139.509	2011-07-31 07:57:00	<	9
141.722	38.0833	95.2038	2011-07-31 11:37:00	<	9
141.722	38.0833	95.2038	2011-07-31 11:37:00	<	9
141.667	38.3	112.323	2011-08-09 08:14:00	<	4
141.667	38.3	112.323	2011-08-09 08:23:00	<	4
141.667	38.3	112.323	2011-08-09 08:33:00	<	4
141.667	38.3	112.323	2011-08-09 08:33:00	<	4
143.003	35.4997	276.112	2011-08-23 05:17:00	0.013
143.003	35.4997	276.112	2011-08-23 05:22:00	0.0033
143.004	35.4998	276.154	2011-08-23 05:25:00	0.0021
144.001	35.5017	338.609	2011-08-23 10:05:00	0.0032
144.003	35.502	338.689	2011-08-23 10:10:00	0.0023
144.013	35.997	307.576	2011-08-23 13:32:00	0.0083
144.016	35.9977	307.764	2011-08-23 13:37:00	0.0029
144.02	35.9987	308.048	2011-08-23 13:41:00	0.0021
143.999	36.4992	281.628	2011-08-23 17:01:00	0.037
143.999	36.4993	281.608	2011-08-23 17:05:00	0.069
144	36.9995	266.449	2011-08-24 05:06:00	0.028
144	36.9998	266.413	2011-08-24 05:09:00	0.019
141.667	38.3	112.323	2011-08-24 08:05:00	<	9
141.667	38.3	112.323	2011-08-24 08:12:00	<	9
141.667	38.3	112.323	2011-08-24 08:16:00	<	9
143.999	37.4988	262.231	2011-08-24 08:19:00	0.022
143.999	37.4995	262.233	2011-08-24 08:23:00	0.038
144	38.0002	269.845	2011-08-24 12:10:00	0.018
143.999	38.0002	269.83	2011-08-24 12:13:00	0.029
144.002	38.4985	288.278	2011-08-24 15:20:00	0.013
144.002	38.4987	288.326	2011-08-24 15:23:00	0.019
141.999	37.996	106.335	2011-08-25 05:06:00	0.019
141.998	37.9945	106.164	2011-08-25 05:10:00	0.029
143	38.4987	210.921	2011-08-25 10:18:00	0.042
143.001	38.4978	210.965	2011-08-25 10:21:00	0.076
142.999	38.0013	185.138	2011-08-25 13:19:00	0.026
142.998	38.0017	185.109	2011-08-25 13:23:00	0.11
143	37.5013	173.952	2011-08-25 16:24:00	0.041
143	37.5013	173.922	2011-08-25 16:27:00	0.11
142.002	36.999	97.7597	2011-08-26 05:07:00	0.064
142.002	36.9988	97.7687	2011-08-26 05:11:00	0.041
142.998	36.9992	179.895	2011-08-26 10:01:00	0.029
142.997	36.9998	179.818	2011-08-26 10:05:00	0.094
143.003	36.4995	202.24	2011-08-26 13:15:00	0.021
143.005	36.4998	202.336	2011-08-26 13:18:00	0.1
143.006	36.0012	235.589	2011-08-26 16:47:00	0.0056
143.007	36.0013	235.686	2011-08-26 16:51:00	0.0018
143.011	36.002	235.832	2011-08-26 16:55:00	0.0013
141.998	36.4998	133.641	2011-08-27 05:04:00	0.072
141.998	36.4998	133.631	2011-08-27 05:07:00	0.053
142	36.0047	179.696	2011-08-27 08:29:00	0.0015
142	36.0058	179.596	2011-08-27 08:32:00	0.0015
142.003	35.5065	230.123	2011-08-27 12:26:00	0.0052
142.006	35.508	230.061	2011-08-27 12:29:00	0.0014
142.01	35.5103	229.964	2011-08-27 12:33:00	0.0012
141.95	35.75	203.293	2011-09-07 09:58:00	0.025
141.95	35.75	203.293	2011-09-07 10:09:00	0.033
141.75	37	78.9749	2011-09-10 12:58:00	0.019
141.75	37	78.9749	2011-09-10 13:10:00	0.00052
141.607	37.25	54.1833	2011-09-11 08:55:00	0.086
141.607	37.25	54.1833	2011-09-11 09:04:00	0.0024
141.607	37.4167	50.5716	2011-09-11 11:05:00	0.056
141.607	37.4167	50.5716	2011-09-11 11:14:00	0.0048
142	37.5	85.7498	2011-09-13 06:52:00	0.08
142	37.5	85.7498	2011-09-13 07:02:00	0.0017
141.607	37.5833	53.5532	2011-09-13 10:30:00	0.095
141.607	37.5833	53.5532	2011-09-13 10:42:00	0.0049
142.083	38.5017	151.56	2011-09-15 06:47:00	0.0047
142.083	38.5017	151.56	2011-09-15 06:58:00	0.0017
141.85	38.5	139.737	2011-09-15 09:26:00	0.0039
141.85	38.5	139.737	2011-09-15 09:36:00	0.039
141.848	38.25	116.684	2011-09-15 11:59:00	0.0026
141.848	38.25	116.684	2011-09-15 12:11:00	0.026
141.667	38.3	112.323	2011-09-27 08:13:00	<	9
141.667	38.3	112.323	2011-09-27 08:23:00	<	9
141.667	38.3	112.323	2011-09-27 08:37:00	<	9
141.95	35.75	203.293	2011-10-13 11:33:00	0.07
141.95	35.75	203.293	2011-10-13 11:49:00	0.025
142.083	38.5017	151.56	2011-10-17 07:31:00	0.047
142.083	38.5017	151.56	2011-10-17 07:48:00	0.0011
141.85	38.5	139.737	2011-10-17 10:39:00	0.0066
141.85	38.5	139.737	2011-10-17 11:28:00	0.019
141.848	38.25	116.684	2011-10-17 16:51:00	0.0045
141.848	38.25	116.684	2011-10-17 16:51:00	0.065
141.848	38.25	116.684	2011-10-17 17:03:00	0.0068
141.848	38.25	116.684	2011-10-17 17:03:00	0.036
141.607	37.5833	53.5532	2011-10-19 12:02:00	0.0053
141.607	37.5833	53.5532	2011-10-19 12:02:00	0.033
141.607	37.5833	53.5532	2011-10-19 12:13:00	0.01
141.607	37.5833	53.5532	2011-10-19 12:13:00	0.016
142	37.5	85.7498	2011-10-19 14:51:00	0.069
142	37.5	85.7498	2011-10-19 15:00:00	0.0011
141.607	37.4167	50.5716	2011-10-22 12:29:00	0.045
141.607	37.4167	50.5716	2011-10-22 12:39:00	0.011
141.607	37.25	54.1833	2011-10-22 14:51:00	0.018
141.607	37.25	54.1833	2011-10-22 14:51:00	0.058
141.607	37.25	54.1833	2011-10-22 15:02:00	0.0092
141.607	37.25	54.1833	2011-10-22 15:02:00	0.013
141.75	37	78.9749	2011-10-24 07:19:00	0.014
141.75	37	78.9749	2011-10-24 07:19:00	0.052
141.75	37	78.9749	2011-10-24 07:33:00	0.00067
141.75	37	78.9749	2011-10-24 07:33:00	0.00075
141.667	38.3	112.323	2011-10-25 08:16:00	<	1.2
141.667	38.3	112.323	2011-10-25 08:20:00	<	1.2
141.667	38.3	112.323	2011-10-25 08:34:00	<	1.2
141.667	38.3	112.323	2011-11-10 08:08:00	<	1.2
141.667	38.3	112.323	2011-11-10 08:13:00	<	1.2
141.667	38.3	112.323	2011-11-10 08:20:00	<	1.2
141.667	38.3	112.323	2011-11-28 08:05:00	<	1.2
141.667	38.3	112.323	2011-11-28 08:16:00	<	1.2
141.667	38.3	112.323	2011-11-28 08:37:00	<	1.2
141.999	37.996	106.335	2011-11-30 12:22:00	0.019
141.998	37.9945	106.164	2011-11-30 12:30:00	0.034
142.999	38.0013	185.138	2011-11-30 16:09:00	0.033
142.998	38.0017	185.109	2011-11-30 16:16:00	0.057
143	38.4987	210.921	2011-11-30 18:48:00	0.025
143	38.4987	210.921	2011-11-30 18:55:00	0.048
144.002	38.4985	288.278	2011-11-30 22:41:00	0.025
144.002	38.4985	288.278	2011-11-30 22:48:00	0.019
143.999	37.4988	262.231	2011-12-01 05:59:00	0.044
143.999	37.4988	262.231	2011-12-01 06:05:00	0.056
143	37.5013	173.952	2011-12-01 09:43:00	0.019
143	37.5013	173.952	2011-12-01 09:49:00	0.039
142.998	36.9992	179.895	2011-12-01 12:18:00	0.0031
142.997	36.9998	179.818	2011-12-01 12:24:00	0.0014
143.999	36.4992	281.628	2011-12-01 16:14:00	0.0015
143.999	36.4992	281.628	2011-12-01 16:19:00	0.0015
143.003	36.4995	202.24	2011-12-01 20:35:00	0.0014
143.003	36.4995	202.24	2011-12-01 20:41:00	0.0012
141.998	36.4998	133.641	2011-12-02 00:47:00	0.0098
141.998	36.4998	133.641	2011-12-02 00:54:00	0.0033
141.95	35.75	203.293	2011-12-05 09:22:00	0.022
141.95	35.75	203.293	2011-12-05 09:33:00	0.019
141.667	38.3	112.323	2011-12-07 08:22:00	<	1.2
141.667	38.3	112.323	2011-12-07 08:30:00	<	1.2
141.667	38.3	112.323	2011-12-07 08:36:00	<	1.2
141.748	37	78.857	2011-12-08 06:45:00	0.014
141.748	36.9983	78.9685	2011-12-08 06:57:00	0.00067
141.605	37.2483	54.1129	2011-12-09 12:50:00	0.018
141.607	37.25	54.1833	2011-12-09 13:00:00	0.013
141.607	37.4167	50.5716	2011-12-10 11:59:00	0.0029
141.607	37.4167	50.5716	2011-12-10 12:09:00	0.0034
141.607	37.4167	50.5716	2011-12-10 12:29:00	0.0083
142	37.5	85.7498	2011-12-14 06:51:00	0.039
142	37.5	85.7498	2011-12-14 07:01:00	0.00082
141.607	37.5817	53.4924	2011-12-14 10:54:00	0.033
141.607	37.5817	53.4924	2011-12-14 11:04:00	0.016
142.083	38.5017	151.56	2011-12-15 06:47:00	0.0043
142.083	38.5017	151.56	2011-12-15 06:59:00	0.0011
141.85	38.5	139.737	2011-12-15 10:07:00	0.0092
141.85	38.5	139.737	2011-12-15 10:16:00	0.036
141.85	38.25	116.775	2011-12-16 06:47:00	0.0065
141.848	38.25	116.684	2011-12-16 06:57:00	0.036
141.667	38.3	112.323	2011-12-19 08:20:00	<	1.2
141.667	38.3	112.323	2011-12-19 08:30:00	<	1.2
141.667	38.3	112.323	2011-12-19 08:38:00	<	1.2
141.667	38.3	112.323	2012-01-04 08:28:00	<	1.1
141.667	38.3	112.323	2012-01-04 08:38:00	<	1.1
141.667	38.3	112.323	2012-01-04 08:43:00	<	1.1
141.667	38.3	112.323	2012-01-17 08:21:00	<	1.1
141.667	38.3	112.323	2012-01-17 08:32:00	<	1.1
141.667	38.3	112.323	2012-01-17 08:42:00	<	1.1
141.667	38.3	112.323	2012-01-31 09:50:00	<	1.3
141.667	38.3	112.323	2012-01-31 09:56:00	<	1.3
141.667	38.3	112.323	2012-01-31 10:10:00	<	1.3
141.95	35.75	203.293	2012-02-04 07:09:00	0.0025
141.95	35.75	203.293	2012-02-04 07:40:00	0.0025
141.75	37	78.9749	2012-02-10 10:15:00	0.0024
141.75	37	78.9749	2012-02-10 10:30:00	0.00059
141.607	37.25	54.1833	2012-02-13 06:25:00	0.0024
141.607	37.25	54.1833	2012-02-13 06:40:00	0.0025
141.607	37.4167	50.5716	2012-02-13 15:36:00	0.0026
141.607	37.4167	50.5716	2012-02-13 15:50:00	0.0024
141.667	38.3	112.323	2012-02-14 08:07:00	<	1.3
141.667	38.3	112.323	2012-02-14 08:11:00	<	1.3
141.667	38.3	112.323	2012-02-14 08:15:00	<	1.3
142	37.5	85.7498	2012-02-16 12:31:00	0.011
142	37.5	85.7498	2012-02-16 12:53:00	0.011
142	37.5	85.7498	2012-02-16 13:25:00	0.00073
141.85	38.5	139.737	2012-02-19 07:10:00	0.0048
141.85	38.5	139.737	2012-02-19 07:31:00	0.0048
141.85	38.5	139.737	2012-02-19 08:06:00	0.0047
142.083	38.5017	151.56	2012-02-19 13:59:00	0.0029
142.083	38.5017	151.56	2012-02-19 14:16:00	0.001
141.848	38.25	116.684	2012-02-20 06:55:00	0.011
141.848	38.25	116.684	2012-02-20 07:11:00	0.0036
141.607	37.5833	53.5532	2012-02-21 06:58:00	0.0026
141.607	37.5833	53.5532	2012-02-21 07:10:00	0.0025
141.667	38.3	112.323	2012-02-28 08:13:00	<	1.2
141.667	38.3	112.323	2012-02-28 08:20:00	<	1.2
141.667	38.3	112.323	2012-02-28 08:26:00	<	1.2
141.667	38.3	112.323	2012-03-16 08:25:00	<	1.2
141.667	38.3	112.323	2012-03-16 08:42:00	<	1.2
141.667	38.3	112.323	2012-03-16 08:47:00	<	1.2
141.75	36.9983	79.0862	2012-05-21	0.00064
141.607	37.25	54.1833	2012-05-21	0.0044
141.605	37.25	54.0458	2012-05-21	0.0059
141.748	36.9967	79.0802	2012-05-21	0.0073
141.605	37.25	54.0458	2012-05-21	0.0075
141.748	36.9983	78.9685	2012-05-21	0.0075
142.007	35.5067	230.227	2012-05-22 09:08:00	0.0015
142.007	35.5067	230.227	2012-05-22 09:08:00	0.0018
142.007	35.5067	230.227	2012-05-22 09:08:00	0.0022
142.007	35.5067	230.227	2012-05-22 09:08:00	0.0027
142.007	35.5067	230.227	2012-05-22 09:08:00	0.0064
143	35.4983	276.061	2012-05-23 12:29:00	0.0015
143	35.4983	276.061	2012-05-23 12:29:00	0.0016
143	35.4983	276.061	2012-05-23 12:29:00	0.0048
143	35.4983	276.061	2012-05-23 12:29:00	0.0054
143	35.4983	276.061	2012-05-23 12:29:00	0.0079
143.998	35.5017	338.404	2012-05-23 16:53:00	0.0022
143.998	35.5017	338.404	2012-05-23 16:53:00	0.0028
143.998	35.5017	338.404	2012-05-23 16:53:00	0.0033
143.998	35.5017	338.404	2012-05-23 16:53:00	0.0054
143.998	35.5017	338.404	2012-05-23 16:53:00	0.01
143.497	36.2517	253.863	2012-05-24	0.0017
144.01	36.5017	282.432	2012-05-24 06:06:00	0.00091
144.01	36.5017	282.432	2012-05-24 06:06:00	0.0014
144.01	36.5017	282.432	2012-05-24 06:06:00	0.0019
144.01	36.5017	282.432	2012-05-24 06:06:00	0.0025
144.01	36.5017	282.432	2012-05-24 06:06:00	0.0036
143.01	36.4983	202.839	2012-05-24 11:02:00	0.00085
143.01	36.4983	202.839	2012-05-24 11:02:00	0.0015
143.01	36.4983	202.839	2012-05-24 11:02:00	0.0043
143.01	36.4983	202.839	2012-05-24 11:02:00	0.0044
143.01	36.4983	202.839	2012-05-24 11:02:00	0.0076
142.998	37.4983	173.803	2012-05-24 16:11:00	0.00074
142.998	37.4983	173.803	2012-05-24 16:11:00	0.0012
142.998	37.4983	173.803	2012-05-24 16:11:00	0.0035
142.998	37.4983	173.803	2012-05-24 16:11:00	0.0044
142.998	37.4983	173.803	2012-05-24 16:11:00	0.0061
141.607	37.5833	53.5532	2012-05-25	0.0051
141.608	37.4167	50.719	2012-05-25	0.0065
141.608	37.4167	50.719	2012-05-25	0.0066
141.605	37.5833	53.4141	2012-05-25	0.0071
141.603	37.5833	53.2751	2012-05-25	0.0095
141.607	37.4167	50.5716	2012-05-25	0.011
142	36.5	133.767	2012-05-25 05:59:00	0.00082
142	36.5	133.767	2012-05-25 05:59:00	0.0019
142	36.5	133.767	2012-05-25 05:59:00	0.0022
142	36.5	133.767	2012-05-25 05:59:00	0.0041
142	36.5	133.767	2012-05-25 05:59:00	0.0077
142	37.5	85.7498	2012-05-26	0.00071
142	37.5	85.7498	2012-05-26	0.004
142	37.5	85.7498	2012-05-26	0.0054
142	38	106.696	2012-05-27	0.0019
142	38	106.696	2012-05-27	0.0064
142	38	106.696	2012-05-27	0.0086
142.083	38.4983	151.267	2012-05-28	0.00076
142.085	38.4983	151.357	2012-05-28	0.0023
141.852	38.4983	139.654	2012-05-28	0.0026
141.75	38.25	111.535	2012-05-28	0.0032
141.75	38.2483	111.382	2012-05-28	0.0035
141.85	38.5	139.737	2012-05-28	0.0037
141.85	38.4983	139.578	2012-05-28	0.005
142.085	38.4983	151.357	2012-05-28	0.005
141.752	38.25	111.618	2012-05-28	0.009
143.998	37.5	262.162	2012-05-29 00:01:00	0.00054
143.998	37.5	262.162	2012-05-29 00:01:00	0.00092
143.998	37.5	262.162	2012-05-29 00:01:00	0.0022
143.998	37.5	262.162	2012-05-29 00:01:00	0.0037
143.998	37.5	262.162	2012-05-29 00:01:00	0.0053
144	38.4983	288.137	2012-05-29 04:46:00	0.00097
144	38.4983	288.137	2012-05-29 04:46:00	0.0044
144	38.4983	288.137	2012-05-29 04:46:00	0.0045
144	38.4983	288.137	2012-05-29 04:46:00	0.005
144	38.4983	288.137	2012-05-29 04:46:00	0.014
143.002	38.5017	211.231	2012-05-29 08:47:00	0.00072
143.002	38.5017	211.231	2012-05-29 08:47:00	0.0018
143.002	38.5017	211.231	2012-05-29 08:47:00	0.0044
143.002	38.5017	211.231	2012-05-29 08:47:00	0.0081
143.002	38.5017	211.231	2012-05-29 08:47:00	0.016
142.085	38.4983	151.357	2012-07-31	0.00068
141.853	38.4967	139.572	2012-07-31	0.0023
141.748	38.2517	111.604	2012-07-31	0.0024
142.085	38.4967	151.211	2012-07-31	0.0027
141.75	38.25	111.535	2012-07-31	0.0027
141.853	38.4983	139.73	2012-07-31	0.0041
141.852	38.4983	139.654	2012-07-31	0.0043
142.083	38.4983	151.267	2012-07-31	0.0047
141.748	38.2483	111.298	2012-07-31	0.005
141.997	37.9983	106.349	2012-08-03	0.0026
141.998	37.9983	106.467	2012-08-03	0.003
142	37.4983	85.7319	2012-08-04	0.00068
141.607	37.5817	53.4924	2012-08-04	0.0026
141.61	37.5833	53.8316	2012-08-04	0.003
141.997	37.5	85.4565	2012-08-04	0.0034
141.997	37.5017	85.4748	2012-08-04	0.0047
141.605	37.58	53.2927	2012-08-04	0.0052
141.607	37.25	54.1833	2012-08-05	0.0044
141.607	37.25	54.1833	2012-08-05	0.0049
141.61	37.4117	50.8794	2012-08-05	0.005
141.605	37.4167	50.4243	2012-08-05	0.0053
141.61	37.2483	54.5251	2012-08-05	0.0061
141.607	37.4167	50.5716	2012-08-05	0.0064
141.752	37.0033	78.8715	2012-08-09	0.00058
141.748	36.9983	78.9685	2012-08-09	0.0041
141.75	36.9983	79.0862	2012-08-09	0.0065
141.66	38.2959	111.647	2012-08-17 07:43:00	0.0029
141.66	38.2959	111.647	2012-08-17 07:47:00	0.0026
141.66	38.2959	111.647	2012-08-17 07:58:00	0.0019
141.66	38.2959	111.647	2012-08-24 07:42:00	0.0041
141.66	38.2959	111.647	2012-08-24 07:48:00	0.0051
141.66	38.2959	111.647	2012-08-24 08:05:00	0.0018
141.66	38.2959	111.647	2012-09-04 07:51:00	0.0029
141.66	38.2959	111.647	2012-09-04 07:59:00	0.0024
141.66	38.2959	111.647	2012-09-04 08:11:00	0.0025
141.66	38.2959	111.647	2012-09-21 07:50:00	0.0061
141.66	38.2959	111.647	2012-09-21 07:55:00	0.0029
141.66	38.2959	111.647	2012-09-21 08:05:00	0.0028
141.66	38.2959	111.647	2012-10-16 07:59:00	0.003
141.66	38.2959	111.647	2012-10-16 07:59:00	0.003
141.66	38.2959	111.647	2012-10-16 08:05:00	0.0028
141.66	38.2959	111.647	2012-10-16 08:05:00	0.0028
141.66	38.2959	111.647	2012-10-16 08:25:00	0.0021
141.66	38.2959	111.647	2012-10-16 08:25:00	0.0021
143	38.5012	211.054	2012-10-23 01:06:00	0.0012
143	38.5012	211.054	2012-10-23 01:06:00	0.002
143	38.5012	211.054	2012-10-23 01:06:00	0.0031
143	38.5012	211.054	2012-10-23 01:06:00	0.0038
143	38.5012	211.054	2012-10-23 01:06:00	0.011
142.998	37.5013	173.761	2012-10-23 11:03:00	0.00091
142.998	37.5013	173.761	2012-10-23 11:03:00	0.0022
142.998	37.5013	173.761	2012-10-23 11:03:00	0.0031
142.998	37.5013	173.761	2012-10-23 11:03:00	0.0044
142.998	37.5013	173.761	2012-10-23 11:03:00	0.008
143.004	36.5028	202.14	2012-10-24 03:01:00	0.00057
143.004	36.5028	202.14	2012-10-24 03:01:00	0.0021
143.004	36.5028	202.14	2012-10-24 03:01:00	0.0035
143.004	36.5028	202.14	2012-10-24 03:01:00	0.0037
143.004	36.5028	202.14	2012-10-24 03:01:00	0.0054
142	36.4992	133.839	2012-10-24 08:22:00	0.00062
142	36.4992	133.839	2012-10-24 08:22:00	0.0013
142	36.4992	133.839	2012-10-24 08:22:00	0.0017
142	36.4992	133.839	2012-10-24 08:22:00	0.002
142	36.4992	133.839	2012-10-24 08:22:00	0.0021
142.003	35.5023	230.543	2012-10-24 13:38:00	0.0013
142.003	35.5023	230.543	2012-10-24 13:38:00	0.0015
142.003	35.5023	230.543	2012-10-24 13:38:00	0.0016
142.003	35.5023	230.543	2012-10-24 13:38:00	0.0032
142.003	35.5023	230.543	2012-10-24 13:38:00	0.0035
143	35.5003	275.897	2012-10-24 17:34:00	0.0015
143	35.5003	275.897	2012-10-24 17:34:00	0.0022
143	35.5003	275.897	2012-10-24 17:34:00	0.0026
143	35.5003	275.897	2012-10-24 17:34:00	0.0043
143	35.5003	275.897	2012-10-24 17:34:00	0.012
143.995	35.5013	338.188	2012-10-24 21:48:00	0.0028
143.995	35.5013	338.188	2012-10-24 21:48:00	0.0034
143.995	35.5013	338.188	2012-10-24 21:48:00	0.0051
143.995	35.5013	338.188	2012-10-24 21:48:00	0.0052
143.995	35.5013	338.188	2012-10-24 21:48:00	0.0058
141.607	37.4167	50.5716	2012-10-25	0.0019
141.605	37.2483	54.1129	2012-10-25	0.0021
141.605	37.2483	54.1129	2012-10-25	0.0021
141.605	37.415	50.428	2012-10-25	0.0023
141.605	37.415	50.428	2012-10-25	0.0023
141.605	37.2483	54.1129	2012-10-25	0.0028
141.605	37.415	50.428	2012-10-25	0.0044
141.605	37.25	54.0458	2012-10-25	0.0052
144.005	36.4997	282.101	2012-10-25 04:33:00	0.0013
144.005	36.4997	282.101	2012-10-25 04:33:00	0.0015
144.005	36.4997	282.101	2012-10-25 04:33:00	0.0022
144.005	36.4997	282.101	2012-10-25 04:33:00	0.0034
144.005	36.4997	282.101	2012-10-25 04:33:00	0.0068
141.66	38.2959	111.647	2012-10-25 07:54:00	0.0019
141.66	38.2959	111.647	2012-10-25 08:01:00	0.0029
141.66	38.2959	111.647	2012-10-25 08:08:00	0.0021
143.998	37.4978	262.154	2012-10-25 09:21:00	0.00087
143.998	37.4978	262.154	2012-10-25 09:21:00	0.0019
143.998	37.4978	262.154	2012-10-25 09:21:00	0.0025
143.998	37.4978	262.154	2012-10-25 09:21:00	0.0029
143.998	37.4978	262.154	2012-10-25 09:21:00	0.0036
144	38.4978	288.14	2012-10-25 14:32:00	0.0013
144	38.4978	288.14	2012-10-25 14:32:00	0.0018
144	38.4978	288.14	2012-10-25 14:32:00	0.0029
144	38.4978	288.14	2012-10-25 14:32:00	0.005
144	38.4978	288.14	2012-10-25 14:32:00	0.013
141.998	37.5	85.6031	2012-10-26	0.00067
141.997	37.4983	85.4385	2012-10-26	0.0017
141.997	37.4983	85.4385	2012-10-26	0.0017
141.607	37.5833	53.5532	2012-10-26	0.0019
141.998	37.5	85.6031	2012-10-26	0.0027
141.607	37.5833	53.5532	2012-10-26	0.0028
141.605	37.5833	53.4141	2012-10-26	0.003
141.605	37.5833	53.4141	2012-10-26	0.003
141.752	38.2517	111.771	2012-10-30	0.0015
141.85	38.4983	139.578	2012-10-30	0.0024
142.083	38.5017	151.56	2012-10-30	0.0024
142.083	38.5017	151.56	2012-10-31	0.00079
141.998	38	106.578	2012-10-31	0.001
141.752	38.2517	111.771	2012-10-31	0.0015
141.748	38.2483	111.298	2012-10-31	0.0019
141.75	38.2517	111.688	2012-10-31	0.0021
142.083	38.5	151.414	2012-10-31	0.0022
142	38	106.696	2012-10-31	0.0023
141.85	38.4983	139.578	2012-10-31	0.0024
142.083	38.5017	151.56	2012-10-31	0.0024
142	37.9967	106.473	2012-10-31	0.0024
142	37.9967	106.473	2012-10-31	0.0024
141.848	38.5017	139.82	2012-10-31	0.0026
141.85	38.5017	139.896	2012-10-31	0.0053
141.75	37	78.9749	2012-11-04	0.00046
141.75	37	78.9749	2012-11-04	0.0022
141.75	37	78.9749	2012-11-04	0.003
141.75	37	78.9749	2012-11-04	0.003
141.66	38.2959	111.647	2012-11-22 07:47:00	0.0045
141.66	38.2959	111.647	2012-11-22 07:51:00	0.0061
141.66	38.2959	111.647	2012-11-22 07:56:00	0.0047
141.66	38.2959	111.647	2012-12-13 07:59:00	0.0053
141.66	38.2959	111.647	2012-12-13 08:13:00	0.0038
141.66	38.2959	111.647	2012-12-13 08:26:00	0.0027
141.66	38.2959	111.647	2012-12-20 07:57:00	0.0046
141.66	38.2959	111.647	2012-12-20 08:07:00	0.0038
141.66	38.2959	111.647	2012-12-20 08:18:00	0.0039
141.66	38.2959	111.647	2013-01-08 07:59:00	0.002
141.66	38.2959	111.647	2013-01-08 08:08:00	0.0027
141.66	38.2959	111.647	2013-01-08 08:29:00	0.002
142.082	38.4983	151.177	2013-01-17	0.00074
141.748	38.2483	111.298	2013-01-17	0.0018
141.848	38.4983	139.502	2013-01-17	0.0019
142.082	38.4983	151.177	2013-01-17	0.0019
141.748	38.2483	111.298	2013-01-17	0.0019
142.082	38.4983	151.177	2013-01-17	0.002
141.748	38.2483	111.298	2013-01-17	0.002
141.848	38.4983	139.502	2013-01-17	0.0022
141.848	38.4983	139.502	2013-01-17	0.0027
141.607	37.415	50.5753	2013-01-19	0.0029
141.607	37.415	50.5753	2013-01-19	0.003
141.607	37.415	50.5753	2013-01-19	0.0032
141.605	37.5817	53.3531	2013-01-21	0.002
141.605	37.5817	53.3531	2013-01-21	0.002
141.605	37.5817	53.3531	2013-01-21	0.0021
141.605	37.2467	54.1806	2013-01-21	0.003
141.605	37.2467	54.1806	2013-01-21	0.0034
141.605	37.2467	54.1806	2013-01-21	0.0036
141.998	37.9917	106.023	2013-01-22	0.0013
141.998	37.9917	106.023	2013-01-22	0.0022
141.998	37.9917	106.023	2013-01-22	0.0029
141.748	36.9983	78.9685	2013-01-24	0.0005
141.607	37.415	50.5753	2013-01-24	0.00062
141.748	36.9983	78.9685	2013-01-24	0.0025
141.607	37.415	50.5753	2013-01-24	0.0026
141.607	37.415	50.5753	2013-01-24	0.0026
141.748	36.9983	78.9685	2013-01-24	0.0028
141.66	38.2959	111.647	2013-01-29 08:04:00	0.0032
141.66	38.2959	111.647	2013-01-29 08:12:00	0.0026
141.66	38.2959	111.647	2013-01-29 08:28:00	0.0028
141.66	38.2959	111.647	2013-02-06 07:49:00	0.0022
141.66	38.2959	111.647	2013-02-06 07:52:00	0.003
141.66	38.2959	111.647	2013-02-06 08:02:00	0.0024
141.66	38.2959	111.647	2013-03-05 07:51:00	0.0019
141.66	38.2959	111.647	2013-03-05 07:58:00	0.0019
141.66	38.2959	111.647	2013-03-05 08:11:00	0.0019
141.66	38.2959	111.647	2013-03-22 07:46:00	0.0072
141.66	38.2959	111.647	2013-03-22 07:52:00	0.004
141.66	38.2959	111.647	2013-03-22 08:01:00	0.0037
141.66	38.2959	111.647	2013-03-26 07:53:00	0.0024
141.66	38.2959	111.647	2013-03-26 08:02:00	0.002
141.66	38.2959	111.647	2013-03-26 08:15:00	0.0024
141.66	38.2959	111.647	2013-04-05 07:55:00	0.0021
141.66	38.2959	111.647	2013-04-05 08:01:00	0.0025
141.66	38.2959	111.647	2013-04-05 08:20:00	0.0017
141.66	38.2959	111.647	2013-04-18 08:06:00	0.0021
141.66	38.2959	111.647	2013-04-18 08:11:00	0.0036
141.66	38.2959	111.647	2013-04-18 08:24:00	0.0023
141.66	38.2959	111.647	2013-05-09 07:50:00	0.0018
141.66	38.2959	111.647	2013-05-09 07:52:00	0.0018
141.66	38.2959	111.647	2013-05-09 08:10:00	0.0015
144	38.5	288.214	2013-05-16	0.00068
144	37.5	262.309	2013-05-16	0.00084
144	38.5	288.214	2013-05-16	0.00095
144	37.5	262.309	2013-05-16	0.0016
144	38.5	288.214	2013-05-16	0.0018
144	37.5	262.309	2013-05-16	0.0018
144	37.5	262.309	2013-05-16	0.002
144	38.5	288.214	2013-05-16	0.0023
144	37.5	262.309	2013-05-16	0.0023
144	38.5	288.214	2013-05-16	0.0025
142.998	37.5	173.812	2013-05-18	0.0009
142.998	37.5	173.812	2013-05-18	0.0015
142.998	37.5	173.812	2013-05-18	0.0015
142.998	37.5	173.812	2013-05-18	0.0021
142.998	37.5	173.812	2013-05-18	0.0026
142.998	38.5	210.883	2013-05-19	0.00091
142.998	38.5	210.883	2013-05-19	0.0019
142.998	38.5	210.883	2013-05-19	0.0021
142.998	38.5	210.883	2013-05-19	0.0022
142.998	38.5	210.883	2013-05-19	0.0029
141.66	38.2959	111.647	2013-05-21 07:40:00	0.0021
141.66	38.2959	111.647	2013-05-21 07:42:00	0.0022
141.66	38.2959	111.647	2013-05-21 08:03:00	0.0019
141.748	36.9983	78.9685	2013-05-22	0.00074
141.748	36.9983	78.9685	2013-05-22	0.00074
141.748	36.9983	78.9685	2013-05-22	0.002
141.748	36.9983	78.9685	2013-05-22	0.002
141.748	36.9983	78.9685	2013-05-22	0.002
141.748	36.9983	78.9685	2013-05-22	0.002
141.605	37.2467	54.1806	2013-05-23	0.0016
141.605	37.2467	54.1806	2013-05-23	0.0016
141.605	37.2467	54.1806	2013-05-23	0.0018
141.605	37.2467	54.1806	2013-05-23	0.0018
141.605	37.2467	54.1806	2013-05-23	0.0036
141.605	37.2467	54.1806	2013-05-23	0.0036
141.607	37.415	50.5753	2013-05-26	0.00061
141.607	37.415	50.5753	2013-05-26	0.000613
141.607	37.415	50.5753	2013-05-26	0.0016
141.607	37.415	50.5753	2013-05-26	0.0016
141.607	37.415	50.5753	2013-05-26	0.002
141.607	37.415	50.5753	2013-05-26	0.002
141.607	37.415	50.5753	2013-05-27	0.0015
141.607	37.415	50.5753	2013-05-27	0.0015
141.607	37.415	50.5753	2013-05-27	0.0015
141.607	37.415	50.5753	2013-05-27	0.0015
141.607	37.415	50.5753	2013-05-27	0.0015
141.607	37.415	50.5753	2013-05-27	0.0015
141.605	37.5817	53.3531	2013-05-28	0.0013
141.605	37.5817	53.3531	2013-05-28	0.0013
141.605	37.5817	53.3531	2013-05-28	0.0017
141.605	37.5817	53.3531	2013-05-28	0.0017
141.605	37.5817	53.3531	2013-05-28	0.0018
141.605	37.5817	53.3531	2013-05-28	0.0018
141.998	37.9917	106.023	2013-06-01	0.00093
141.998	37.9917	106.023	2013-06-01	0.00093
141.998	37.9917	106.023	2013-06-01	0.001
141.998	37.9917	106.023	2013-06-01	0.001
141.748	38.2483	111.298	2013-06-01	0.0014
141.748	38.2483	111.298	2013-06-01	0.0014
141.748	38.2483	111.298	2013-06-01	0.0015
141.748	38.2483	111.298	2013-06-01	0.0015
141.748	38.2483	111.298	2013-06-01	0.0016
141.748	38.2483	111.298	2013-06-01	0.0016
141.998	37.9917	106.023	2013-06-01	0.0021
141.998	37.9917	106.023	2013-06-01	0.0021
142.082	38.4983	151.177	2013-06-02	0.00082
142.082	38.4983	151.177	2013-06-02	0.00082
141.848	38.4983	139.502	2013-06-02	0.0014
142.082	38.4983	151.177	2013-06-02	0.0014
142.082	38.4983	151.177	2013-06-02	0.0014
141.848	38.4983	139.502	2013-06-02	0.0014
142.082	38.4983	151.177	2013-06-02	0.0014
142.082	38.4983	151.177	2013-06-02	0.0014
141.848	38.4983	139.502	2013-06-02	0.0016
141.848	38.4983	139.502	2013-06-02	0.0016
141.848	38.4983	139.502	2013-06-02	0.0021
141.848	38.4983	139.502	2013-06-02	0.0021
141.66	38.2959	111.647	2013-06-04 07:35:00	0.0012
141.66	38.2959	111.647	2013-06-04 07:41:00	0.0016
141.66	38.2959	111.647	2013-06-04 07:57:00	0.0011
141.66	38.2959	111.647	2013-06-18 07:39:00	0.0023
141.66	38.2959	111.647	2013-06-18 07:47:00	0.0025
141.66	38.2959	111.647	2013-06-18 08:06:00	0.0016
141.66	38.2959	111.647	2013-07-10 07:53:00	0.002
141.66	38.2959	111.647	2013-07-10 08:03:00	0.0016
141.66	38.2959	111.647	2013-07-10 08:14:00	0.0016
141.66	38.2959	111.647	2013-07-17 07:44:00	<	0.0017
141.66	38.2959	111.647	2013-07-17 07:59:00	0.0045
141.66	38.2959	111.647	2013-07-17 08:02:00	0.0033
141.66	38.2959	111.647	2013-08-01 08:01:00	0.003
141.66	38.2959	111.647	2013-08-01 08:03:00	0.0031
141.66	38.2959	111.647	2013-08-01 08:21:00	<	0.0017
141.748	36.9983	78.9685	2013-08-17	0.0018
141.748	36.9983	78.9685	2013-08-17	0.0018
141.748	36.9983	78.9685	2013-08-17	0.0019
141.748	36.9983	78.9685	2013-08-17	0.0019
141.748	36.9983	78.9685	2013-08-17	<	0.00059
141.748	36.9983	78.9685	2013-08-17	<	0.00059
141.66	38.2959	111.647	2013-08-20 07:46:00	0.0041
141.66	38.2959	111.647	2013-08-20 07:53:00	0.0025
141.66	38.2959	111.647	2013-08-20 08:08:00	0.0024
141.605	37.2467	54.1806	2013-08-21	0.0016
141.605	37.2467	54.1806	2013-08-21	0.0016
141.605	37.2467	54.1806	2013-08-21	0.0019
141.605	37.2467	54.1806	2013-08-21	0.0019
141.605	37.2467	54.1806	2013-08-21	0.0022
141.605	37.2467	54.1806	2013-08-21	0.0022
141.607	37.415	50.5753	2013-08-22	0.0008
141.607	37.415	50.5753	2013-08-22	0.0008
141.607	37.415	50.5753	2013-08-22	0.0016
141.607	37.415	50.5753	2013-08-22	0.0016
141.607	37.415	50.5753	2013-08-22	0.0019
141.607	37.415	50.5753	2013-08-22	0.0019
141.607	37.415	50.5753	2013-08-23	0.0013
141.607	37.415	50.5753	2013-08-23	0.0013
141.605	37.5817	53.3531	2013-08-23	0.0016
141.605	37.5817	53.3531	2013-08-23	0.0016
141.605	37.5817	53.3531	2013-08-23	0.0016
141.605	37.5817	53.3531	2013-08-23	0.0016
141.607	37.415	50.5753	2013-08-23	0.0019
141.607	37.415	50.5753	2013-08-23	0.0019
141.605	37.5817	53.3531	2013-08-23	0.002
141.607	37.415	50.5753	2013-08-23	0.002
141.605	37.5817	53.3531	2013-08-23	0.002
141.607	37.415	50.5753	2013-08-23	0.002
141.748	38.2483	111.298	2013-08-24	0.0016
141.748	38.2483	111.298	2013-08-24	0.0016
141.748	38.2483	111.298	2013-08-24	0.0017
141.748	38.2483	111.298	2013-08-24	0.0017
141.748	38.2483	111.298	2013-08-24	0.0019
141.748	38.2483	111.298	2013-08-24	0.0019
142.082	38.4983	151.177	2013-08-25	0.00064
142.082	38.4983	151.177	2013-08-25	0.00064
141.848	38.4983	139.502	2013-08-25	0.0016
141.848	38.4983	139.502	2013-08-25	0.0016
141.848	38.4983	139.502	2013-08-25	0.0016
141.848	38.4983	139.502	2013-08-25	0.0016
142.082	38.4983	151.177	2013-08-25	0.0017
142.082	38.4983	151.177	2013-08-25	0.0017
142.082	38.4983	151.177	2013-08-25	0.0018
142.082	38.4983	151.177	2013-08-25	0.0018
141.848	38.4983	139.502	2013-08-25	0.0022
141.848	38.4983	139.502	2013-08-25	0.0022
141.998	37.9917	106.023	2013-08-26	0.0012
141.998	37.9917	106.023	2013-08-26	0.0012
141.998	37.9917	106.023	2013-08-26	0.0019
141.998	37.9917	106.023	2013-08-26	0.0019
141.998	37.9917	106.023	2013-08-26	0.0019
141.998	37.9917	106.023	2013-08-26	0.0019
141.66	38.2959	111.647	2013-09-06 07:51:00	0.0028
141.66	38.2959	111.647	2013-09-06 07:55:00	0.0018
141.66	38.2959	111.647	2013-09-06 08:15:00	0.0013
141.66	38.2959	111.647	2013-09-18 07:38:00	0.0037
141.66	38.2959	111.647	2013-09-18 07:44:00	0.002
141.66	38.2959	111.647	2013-09-18 08:01:00	0.0023
141.66	38.2959	111.647	2013-10-04 07:47:00	0.0026
141.66	38.2959	111.647	2013-10-04 07:51:00	0.0018
141.66	38.2959	111.647	2013-10-04 08:09:00	0.0022
142.082	38.4983	151.177	2013-11-04	0.00089
141.848	38.4983	139.502	2013-11-04	0.0017
142.082	38.4983	151.177	2013-11-04	0.0017
141.848	38.4983	139.502	2013-11-04	0.0019
141.848	38.4983	139.502	2013-11-04	0.002
142.082	38.4983	151.177	2013-11-04	0.0022
141.998	37.9917	106.023	2013-11-06	0.0017
141.748	38.2483	111.298	2013-11-06	0.0018
141.998	37.9917	106.023	2013-11-06	0.0019
141.998	37.9917	106.023	2013-11-06	0.002
141.748	38.2483	111.298	2013-11-06	0.0022
141.748	38.2483	111.298	2013-11-06	0.0025
141.605	37.5817	53.3531	2013-11-08	0.002
141.605	37.5817	53.3531	2013-11-08	0.002
141.605	37.5817	53.3531	2013-11-08	0.0021
141.607	37.415	50.5753	2013-11-14	0.00093
141.607	37.415	50.5753	2013-11-14	0.0021
141.607	37.415	50.5753	2013-11-14	0.0023
141.605	37.2467	54.1806	2013-11-20	0.0018
141.605	37.2467	54.1806	2013-11-20	0.0019
141.605	37.2467	54.1806	2013-11-20	0.0024
141.748	36.9983	78.9685	2013-11-23	0.00082
141.748	36.9983	78.9685	2013-11-23	0.0019
141.748	36.9983	78.9685	2013-11-23	0.0019
141.607	37.415	50.5753	2013-11-24	0.0014
141.607	37.415	50.5753	2013-11-24	0.002
141.607	37.415	50.5753	2013-11-24	0.0024
141.748	36.9983	78.9685	2014-01-17	0.00085
141.748	36.9983	78.9685	2014-01-17	0.0019
141.748	36.9983	78.9685	2014-01-17	0.0019
141.605	37.2467	54.1806	2014-01-22	0.0016
141.605	37.5817	53.3531	2014-01-22	0.0018
141.607	37.415	50.5753	2014-01-22	0.0018
141.607	37.415	50.5753	2014-01-22	0.0019
141.605	37.2467	54.1806	2014-01-22	0.002
141.605	37.2467	54.1806	2014-01-22	0.0021
141.607	37.415	50.5753	2014-01-22	0.0022
141.605	37.5817	53.3531	2014-01-22	0.0025
141.605	37.5817	53.3531	2014-01-22	0.0025
141.607	37.415	50.5753	2014-01-24	0.00062
141.607	37.415	50.5753	2014-01-24	0.0021
141.607	37.415	50.5753	2014-01-24	0.0024
142.082	38.4983	151.177	2014-01-25	0.00092
142.082	38.4983	151.177	2014-01-25	0.0014
141.998	37.9917	106.023	2014-01-25	0.0016
141.998	37.9917	106.023	2014-01-25	0.0017
141.998	37.9917	106.023	2014-01-25	0.0019
142.082	38.4983	151.177	2014-01-25	0.0029
141.748	38.2483	111.298	2014-01-27	0.0017
141.748	38.2483	111.298	2014-01-27	0.002
141.748	38.2483	111.298	2014-01-27	0.0021
141.848	38.4983	139.502	2014-01-28	0.002
141.848	38.4983	139.502	2014-01-28	0.002
141.848	38.4983	139.502	2014-01-28	0.002
142.082	38.4983	151.177	2014-05-15	0.00086
142.082	38.4983	151.177	2014-05-15	0.0013
141.748	38.2483	111.298	2014-05-15	0.0015
141.748	38.2483	111.298	2014-05-15	0.0016
141.848	38.4983	139.502	2014-05-15	0.0017
141.848	38.4983	139.502	2014-05-15	0.0017
141.748	38.2483	111.298	2014-05-15	0.0017
141.848	38.4983	139.502	2014-05-15	0.0019
142.082	38.4983	151.177	2014-05-15	0.0019
141.998	37.9917	106.023	2014-05-16	0.0013
141.605	37.5817	53.3531	2014-05-16	0.0014
141.998	37.9917	106.023	2014-05-16	0.0015
141.998	37.9917	106.023	2014-05-16	0.0016
141.605	37.5817	53.3531	2014-05-16	0.002
141.605	37.5817	53.3531	2014-05-16	0.0061
141.607	37.415	50.5753	2014-05-18	0.0014
141.605	37.2467	54.1806	2014-05-18	0.0015
141.605	37.2467	54.1806	2014-05-18	0.0015
141.607	37.415	50.5753	2014-05-18	0.0019
141.607	37.415	50.5753	2014-05-18	0.0038
141.605	37.2467	54.1806	2014-05-18	0.0048
141.607	37.415	50.5753	2014-05-19	0.00062
141.607	37.415	50.5753	2014-05-19	0.0015
141.607	37.415	50.5753	2014-05-19	0.0018
141.748	36.9983	78.9685	2014-05-25	0.00057
141.748	36.9983	78.9685	2014-05-25	0.0016
141.748	36.9983	78.9685	2014-05-25	0.0028
143	38.5	211.005	2014-06-18	0.00059
143	38.5	211.005	2014-06-18	0.0011
144	38.5	288.214	2014-06-18	0.0012
143	38.5	211.005	2014-06-18	0.0013
144	38.5	288.214	2014-06-18	0.0014
143	38.5	211.005	2014-06-18	0.0017
143	38.5	211.005	2014-06-18	0.002
144	38.5	288.214	2014-06-18	0.002
144	38.5	288.214	2014-06-18	0.0028
144	38.5	288.214	2014-06-18	0.003
143	37.5	173.959	2014-06-19	0.00054
144	37.5	262.309	2014-06-19	0.0008
143	37.5	173.959	2014-06-19	0.00093
144	37.5	262.309	2014-06-19	0.0012
143	37.5	173.959	2014-06-19	0.0016
144	37.5	262.309	2014-06-19	0.0017
143	37.5	173.959	2014-06-19	0.0018
144	37.5	262.309	2014-06-19	0.0021
143	37.5	173.959	2014-06-19	0.0022
144	37.5	262.309	2014-06-19	0.0025
142	36.5	133.748	2014-06-20	0.00086
142	36.5	133.748	2014-06-20	0.0012
142	36.5	133.748	2014-06-20	0.0014
142	36.5	133.748	2014-06-20	0.002
142	36.5	133.748	2014-06-20	0.0033
143	36.5	201.984	2014-06-21	0.0007
143	36.5	201.984	2014-06-21	0.0015
144	36.5	281.676	2014-06-21	0.0015
144	36.5	281.676	2014-06-21	0.002
144	36.5	281.676	2014-06-21	0.0021
143	36.5	201.984	2014-06-21	0.0024
143	36.5	201.984	2014-06-21	0.0026
143	36.5	201.984	2014-06-21	0.0028
144	36.5	281.676	2014-06-21	0.0029
144	36.5	281.676	2014-06-21	0.0032
144	35.5	338.635	2014-06-22	0.0027
144	35.5	338.635	2014-06-22	0.0028
144	35.5	338.635	2014-06-22	0.0033
144	35.5	338.635	2014-06-22	0.0035
144	35.5	338.635	2014-06-22	0.0051
143	35.5	275.916	2014-06-23	0.0022
143	35.5	275.916	2014-06-23	0.0031
143	35.5	275.916	2014-06-23	0.0032
143	35.5	275.916	2014-06-23	0.0038
143	35.5	275.916	2014-06-23	0.0047
142	35.5	230.697	2014-06-24	0.0016
142	35.5	230.697	2014-06-24	0.0019
142	35.5	230.697	2014-06-24	0.0023
142	35.5	230.697	2014-06-24	0.0033
142	35.5	230.697	2014-06-24	0.0043
141.66	38.2959	111.647	2014-09-08 08:12:00	0.0027
141.66	38.2959	111.647	2014-09-08 08:27:00	0.002
141.66	38.2959	111.647	2014-09-08 08:40:00	0.0021
141.66	38.2959	111.647	2014-09-17 08:09:00	0.0034
141.66	38.2959	111.647	2014-09-17 08:18:00	0.0023
141.66	38.2959	111.647	2014-09-17 08:37:00	0.0029
141.66	38.2959	111.647	2014-10-09 08:18:00	0.0021
141.66	38.2959	111.647	2014-10-09 08:18:00	0.0021
141.66	38.2959	111.647	2014-10-09 08:30:00	0.0023
141.66	38.2959	111.647	2014-10-09 08:30:00	0.0023
141.66	38.2959	111.647	2014-10-09 08:46:00	0.0015
141.66	38.2959	111.647	2014-10-09 08:46:00	0.0015
141.66	38.2959	111.647	2014-10-21 08:18:00	0.0032
141.66	38.2959	111.647	2014-10-21 08:18:00	0.0032
141.66	38.2959	111.647	2014-10-21 08:25:00	0.0031
141.66	38.2959	111.647	2014-10-21 08:25:00	0.0031
141.66	38.2959	111.647	2014-10-21 08:45:00	0.0021
141.66	38.2959	111.647	2014-10-21 08:45:00	0.0021
143	38.5	211.005	2014-10-22	0.0006
143	38.5	211.005	2014-10-22	0.001
143	38.5	211.005	2014-10-22	0.0013
143	38.5	211.005	2014-10-22	0.0017
143	38.5	211.005	2014-10-22	0.0018
143	37.5	173.959	2014-10-24	0.00073
143	37.5	173.959	2014-10-24	0.0012
143	37.5	173.959	2014-10-24	0.0017
143	37.5	173.959	2014-10-24	0.0023
143	37.5	173.959	2014-10-24	0.0028
144	37.5	262.309	2014-10-25	0.00066
144	38.5	288.214	2014-10-25	0.0011
144	37.5	262.309	2014-10-25	0.0013
144	38.5	288.214	2014-10-25	0.0014
144	37.5	262.309	2014-10-25	0.0015
144	38.5	288.214	2014-10-25	0.0018
144	38.5	288.214	2014-10-25	0.002
144	37.5	262.309	2014-10-25	0.002
144	37.5	262.309	2014-10-25	0.0026
144	38.5	288.214	2014-10-25	0.0031
144	35.5	338.635	2014-10-26	0.0014
144	36.5	281.676	2014-10-26	0.0015
144	35.5	338.635	2014-10-26	0.0016
144	35.5	338.635	2014-10-26	0.0024
144	35.5	338.635	2014-10-26	0.0025
144	36.5	281.676	2014-10-26	0.0026
144	36.5	281.676	2014-10-26	0.0029
144	35.5	338.635	2014-10-26	0.003
144	36.5	281.676	2014-10-26	0.0041
144	36.5	281.676	2014-10-26	0.0042
142	35.5	230.697	2014-10-27	0.00083
143	35.5	275.916	2014-10-27	0.00093
142	35.5	230.697	2014-10-27	0.0016
143	35.5	275.916	2014-10-27	0.0016
142	35.5	230.697	2014-10-27	0.0021
143	35.5	275.916	2014-10-27	0.0026
143	35.5	275.916	2014-10-27	0.0027
142	35.5	230.697	2014-10-27	0.0029
142	35.5	230.697	2014-10-27	0.0029
143	35.5	275.916	2014-10-27	0.003
142	36.5	133.748	2014-10-28	0.0017
142	36.5	133.748	2014-10-28	0.0018
142	36.5	133.748	2014-10-28	0.0027
142	36.5	133.748	2014-10-28	0.0034
142	36.5	133.748	2014-10-28	0.0045
143	36.5	201.984	2014-10-29	0.0014
143	36.5	201.984	2014-10-29	0.0016
143	36.5	201.984	2014-10-29	0.0027
143	36.5	201.984	2014-10-29	0.0045
143	36.5	201.984	2014-10-29	0.0046
141.66	38.2959	111.647	2014-11-05 08:16:00	0.0019
141.66	38.2959	111.647	2014-11-05 08:16:00	0.0019
141.66	38.2959	111.647	2014-11-05 08:25:00	0.0018
141.66	38.2959	111.647	2014-11-05 08:25:00	0.0018
141.66	38.2959	111.647	2014-11-05 08:40:00	0.0017
141.66	38.2959	111.647	2014-11-05 08:40:00	0.0017
141.66	38.2959	111.647	2014-11-19 08:13:00	0.0025
141.66	38.2959	111.647	2014-11-19 08:13:00	0.0025
141.66	38.2959	111.647	2014-11-19 08:22:00	0.0019
141.66	38.2959	111.647	2014-11-19 08:22:00	0.0019
141.66	38.2959	111.647	2014-11-19 08:40:00	0.0019
141.66	38.2959	111.647	2014-11-19 08:40:00	0.0019
141.66	38.2959	111.647	2014-12-08 08:15:00	0.0019
141.66	38.2959	111.647	2014-12-08 08:23:00	0.0021
141.66	38.2959	111.647	2014-12-08 08:47:00	0.0016
141.66	38.2959	111.647	2014-12-19 07:59:00	0.002
141.66	38.2959	111.647	2014-12-19 08:01:00	0.0019
141.66	38.2959	111.647	2014-12-19 08:18:00	0.002
141.75	37	78.9749	2015-01-21	0.0011
141.75	37	78.9749	2015-01-21	0.0022
141.75	37	78.9749	2015-01-21	0.0023
141.66	38.2959	111.647	2015-01-21 07:58:00	0.0027
141.66	38.2959	111.647	2015-01-21 08:05:00	0.0021
141.66	38.2959	111.647	2015-01-21 08:21:00	0.0021
141.75	38.25	111.535	2015-01-28	0.0016
141.75	38.25	111.535	2015-01-28	0.0017
141.75	38.25	111.535	2015-01-28	0.0018
142	37.5	85.7498	2015-01-29	0.0012
142	37.5	85.7498	2015-01-29	0.0016
142	37.5	85.7498	2015-01-29	<	0.00048
141.61	37.58	53.7111	2015-02-02	0.0015
141.61	37.58	53.7111	2015-02-02	0.0018
141.61	37.58	53.7111	2015-02-02	0.0019
141.61	37.42	50.861	2015-02-04	0.0017
141.61	37.25	54.4584	2015-02-04	0.0017
141.61	37.25	54.4584	2015-02-04	0.0017
141.61	37.42	50.861	2015-02-04	0.0018
141.61	37.42	50.861	2015-02-04	0.0019
141.61	37.25	54.4584	2015-02-04	0.0019
142.08	38.5	151.233	2015-02-05	0.0013
142	38	106.696	2015-02-05	0.0013
141.85	38.5	139.737	2015-02-05	0.0014
142	38	106.696	2015-02-05	0.0016
141.85	38.5	139.737	2015-02-05	0.0017
141.85	38.5	139.737	2015-02-05	0.0018
142.08	38.5	151.233	2015-02-05	0.0019
142.08	38.5	151.233	2015-02-05	0.002
142	38	106.696	2015-02-05	0.002
141.66	38.2959	111.647	2015-02-05 07:54:00	0.002
141.66	38.2959	111.647	2015-02-05 08:03:00	0.0022
141.66	38.2959	111.647	2015-02-05 08:19:00	0.0018
141.66	38.2959	111.647	2015-02-17 08:09:00	0.0031
141.66	38.2959	111.647	2015-02-17 08:20:00	0.002
141.66	38.2959	111.647	2015-02-17 08:34:00	0.0017
141.66	38.2959	111.647	2015-03-06 07:58:00	0.00091
141.66	38.2959	111.647	2015-03-06 08:05:00	0.0013
141.66	38.2959	111.647	2015-03-06 08:19:00	0.0016
141.66	38.2959	111.647	2015-03-26 07:51:00	0.0022
141.66	38.2959	111.647	2015-03-26 08:01:00	0.0026
141.66	38.2959	111.647	2015-03-26 08:20:00	0.0025
141.66	38.2959	111.647	2015-04-08 08:26:00	0.0012
141.66	38.2959	111.647	2015-04-08 08:35:00	0.0014
141.66	38.2959	111.647	2015-04-08 08:52:00	0.0012
141.66	38.2959	111.647	2015-04-22 08:05:00	0.0016
141.66	38.2959	111.647	2015-04-22 08:30:00	0.0018
141.66	38.2959	111.647	2015-04-22 08:40:00	0.0018
142.08	38.5	151.233	2015-05-07	0.00075
142.08	38.5	151.233	2015-05-07	0.0014
142.08	38.5	151.233	2015-05-07	0.0017
141.66	38.2959	111.647	2015-05-07 08:11:00	0.0019
141.66	38.2959	111.647	2015-05-07 08:21:00	0.0017
141.66	38.2959	111.647	2015-05-07 08:34:00	0.0019
141.85	38.5	139.737	2015-05-09	0.0015
141.75	38.25	111.535	2015-05-09	0.0015
141.85	38.5	139.737	2015-05-09	0.0016
141.85	38.5	139.737	2015-05-09	0.0016
141.75	38.25	111.535	2015-05-09	0.0016
141.75	38.25	111.535	2015-05-09	0.0016
142	38	106.696	2015-05-10	0.0012
142	38	106.696	2015-05-10	0.0019
142	38	106.696	2015-05-10	0.0023
141.61	37.58	53.7111	2015-05-16	0.0016
141.61	37.58	53.7111	2015-05-16	0.0016
141.61	37.42	50.861	2015-05-16	0.0016
141.61	37.42	50.861	2015-05-16	0.0016
141.61	37.42	50.861	2015-05-16	0.0034
141.61	37.58	53.7111	2015-05-16	0.0035
141.75	37	78.9749	2015-05-17	0.00054
141.61	37.25	54.4584	2015-05-17	0.0016
141.61	37.25	54.4584	2015-05-17	0.0018
141.75	37	78.9749	2015-05-17	0.0024
141.75	37	78.9749	2015-05-17	0.0024
141.61	37.25	54.4584	2015-05-17	0.0034
142	37.5	85.7498	2015-05-23	0.00077
142	37.5	85.7498	2015-05-23	0.0022
142	37.5	85.7498	2015-05-23	0.0024
143	38.5	211.005	2015-05-26	0.00089
144	38.5	288.214	2015-05-26	0.0015
143	38.5	211.005	2015-05-26	0.0017
143	38.5	211.005	2015-05-26	0.0018
144	38.5	288.214	2015-05-26	0.0018
143	38.5	211.005	2015-05-26	0.0024
144	38.5	288.214	2015-05-26	0.0024
144	38.5	288.214	2015-05-26	0.0029
144	38.5	288.214	2015-05-26	0.003
143	38.5	211.005	2015-05-26	0.0031
141.66	38.2959	111.647	2015-05-26 08:07:00	0.0024
141.66	38.2959	111.647	2015-05-26 08:25:00	0.0019
141.66	38.2959	111.647	2015-05-26 08:36:00	<	0.0013
144	37.5	262.309	2015-05-27	0.00073
143	37.5	173.959	2015-05-27	0.00086
143	37.5	173.959	2015-05-27	0.0011
143	37.5	173.959	2015-05-27	0.0015
144	37.5	262.309	2015-05-27	0.0016
144	37.5	262.309	2015-05-27	0.0016
143	37.5	173.959	2015-05-27	0.0018
144	37.5	262.309	2015-05-27	0.0022
144	37.5	262.309	2015-05-27	0.0026
143	37.5	173.959	2015-05-27	0.0028
143	35.5	275.916	2015-05-28	0.0024
144	35.5	338.635	2015-05-28	0.0026
143	35.5	275.916	2015-05-28	0.0027
143	35.5	275.916	2015-05-28	0.0029
144	35.5	338.635	2015-05-28	0.003
143	35.5	275.916	2015-05-28	0.0034
144	35.5	338.635	2015-05-28	0.0034
143	35.5	275.916	2015-05-28	0.004
144	35.5	338.635	2015-05-28	0.0042
144	35.5	338.635	2015-05-28	0.0049
142	36.5	133.748	2015-05-29	0.00071
142	36.5	133.748	2015-05-29	0.0015
142	36.5	133.748	2015-05-29	0.0016
142	36.5	133.748	2015-05-29	0.0022
142	36.5	133.748	2015-05-29	0.0026
144	36.5	281.676	2015-05-31	0.00087
143	36.5	201.984	2015-05-31	0.0013
144	36.5	281.676	2015-05-31	0.0016
143	36.5	201.984	2015-05-31	0.0017
143	36.5	201.984	2015-05-31	0.0018
144	36.5	281.676	2015-05-31	0.0023
144	36.5	281.676	2015-05-31	0.0023
143	36.5	201.984	2015-05-31	0.0031
143	36.5	201.984	2015-05-31	0.0031
144	36.5	281.676	2015-05-31	0.0039
142	35.5	230.697	2015-06-01	0.0015
142	35.5	230.697	2015-06-01	0.0024
142	35.5	230.697	2015-06-01	0.003
142	35.5	230.697	2015-06-01	0.0031
142	35.5	230.697	2015-06-01	0.0056
141.66	38.2959	111.647	2015-06-02 08:20:00	0.0015
141.66	38.2959	111.647	2015-06-02 08:22:00	0.0014
141.66	38.2959	111.647	2015-06-02 08:28:00	0.0013
141.66	38.2959	111.647	2015-06-16 08:07:00	<	0.0017
141.66	38.2959	111.647	2015-06-16 08:14:00	0.0024
141.66	38.2959	111.647	2015-06-16 08:29:00	0.0023
141.66	38.2959	111.647	2015-07-06 08:08:00	0.0021
141.66	38.2959	111.647	2015-07-06 08:18:00	0.0027
141.66	38.2959	111.647	2015-07-06 08:34:00	0.0024
141.66	38.2959	111.647	2015-07-22 08:04:00	0.0023
141.66	38.2959	111.647	2015-07-22 08:15:00	0.0016
141.66	38.2959	111.647	2015-07-22 08:31:00	0.0021
141.66	38.2959	111.647	2015-08-04 08:07:00	0.0022
141.66	38.2959	111.647	2015-08-04 08:18:00	0.0026
141.66	38.2959	111.647	2015-08-04 08:36:00	0.0019
141.66	38.2959	111.647	2015-08-21 08:14:00	0.003
141.66	38.2959	111.647	2015-08-21 08:18:00	0.0018
141.66	38.2959	111.647	2015-08-21 08:38:00	0.0024

## Sheet: Demersal_fish_2_30km
SELECT	Dist. FDNPP, Km	>= 2 Km AND <= 30 Km		Habitat	= demersal			Bq/Kg fresh			Fish species
Prefecture	Dist. FDNPP, Km	Long, °E dec	lat, °N dec	Habitat	Engl Name	Latin Name	Date Smpl	Cs-137	< DL		Engl Name	Latin Name	Habitat
Fukushima	25.3969	140.964	37.646	Demersal	Ayu sweetfish	Plecoglossus altivelis altivelis	2011-05-26	1500			Alaska pollock	Theragra chalcogramma	Demersal
Fukushima	25.3969	140.964	37.646	Demersal	Ayu sweetfish	Plecoglossus altivelis altivelis	2011-06-18	1700			Angel shark	Squatina sp.	Demersal
Fukushima	25.3969	140.964	37.646	Demersal	Ayu sweetfish	Plecoglossus altivelis altivelis	2011-06-20	2300			Arabesque greenling	Pleurogrammus azonus	Demersal
Fukushima	23.977	141.041	37.6402	Demersal	Conger eel	Conger myriaster	2011-06-27	11			Ayu sweetfish	Plecoglossus altivelis altivelis	Demersal
Fukushima	23.977	141.041	37.6402	Demersal	Brown hakeling	Physiculus maximowiczi	2011-06-27	55			Balloonfish	Diodon holocanthus	Demersal
Fukushima	23.977	141.041	37.6402	Demersal	Monkfish	Lophiomus setigerus	2011-07-11	15			Banded dogfish	Chiloscyllium griseum	Demersal
Fukushima	23.977	141.041	37.6402	Demersal	Olive flounder	Paralichthys olivaceus	2011-07-11	22			Barfin flounder	Verasper moseri	Demersal
Fukushima	23.977	141.041	37.6402	Demersal	Conger eel	Conger myriaster	2011-07-11	20			Black cow-tongue	Paraplagusia japonica	Demersal
Fukushima	23.977	141.041	37.6402	Demersal	Willowy flounder	Tanakius kitaharai	2011-07-11	17			Black scraper	Thamnaconus modestus	Demersal
Fukushima	22.1679	140.809	37.3379	Demersal	Whitespotted char	Salvelinus leucomaenis	2011-07-15	16			Blackfin flounder	Glyptocephalus stelleri	Demersal
Fukushima	23.977	141.041	37.6402	Demersal	Fat greenling	Hexagrammos otakii	2011-07-24	94			Brassblotched rockfish	Sebastes pachycephalus	Demersal
Fukushima	23.977	141.041	37.6402	Demersal	Monkfish	Lophiomus setigerus	2011-07-25	15			Broadbanded thornyhead	Sebastolobus macrochir	Demersal
Fukushima	23.977	141.041	37.6402	Demersal	Olive flounder	Paralichthys olivaceus	2011-07-25	29			Brown hakeling	Physiculus maximowiczi	Demersal
Fukushima	23.977	141.041	37.6402	Demersal	Slime flounder	Microstomus achne	2011-07-25	13			Cherry salmon	Oncorhynchus masou	Demersal
Fukushima	23.977	141.041	37.6402	Demersal	Willowy flounder	Tanakius kitaharai	2011-07-25	31			Chum salmon	Oncorhynchus keta	Demersal
Fukushima	23.977	141.041	37.6402	Demersal	Sea raven	Hemitripterus villosus	2011-07-25	23			Cloudy catshark	Scyliorhinus torazame	Demersal
Fukushima	23.977	141.041	37.6402	Demersal	Littlemouth flounder	Pleuronectes herzensteini	2011-07-25	79			Common horse mackerel		Demersal
Fukushima	23.977	141.041	37.6402	Demersal	Shotted halibut	Eopsetta grigorjewi	2011-07-25	47			Common skate	Raja kenojei	Demersal
Fukushima	23.977	141.041	37.6402	Demersal	John Dory	Zeus faber	2011-07-25	10			Conger eel	Conger myriaster	Demersal
Fukushima	23.977	141.041	37.6402	Demersal	Fat greenling	Hexagrammos otakii	2011-08-01	160			Congrid eel	Gnathophis nystromi nystromi	Demersal
Fukushima	23.977	141.041	37.6402	Demersal	Seabass	Lateolabrax japonicus	2011-08-01	54			Crimson sea bream	Evynnis japonica	Demersal
Fukushima	23.977	141.041	37.6402	Demersal	Olive flounder	Paralichthys olivaceus	2011-08-01	60			Deep-sea smelt	Glossanodon semifasciatus	Demersal
Fukushima	23.977	141.041	37.6402	Demersal	Slime flounder	Microstomus achne	2011-08-01	57			Dory	Zenopsis nebulosa	Demersal
Fukushima	23.977	141.041	37.6402	Demersal	Marbled flounder	Pleuronectes yokohamae	2011-08-01	35			Drumfish		Demersal
Fukushima	23.977	141.041	37.6402	Demersal	Japanese black porgy	Acanthopagrus schlegelii	2011-08-01	62			Elkhorn sculpin	Alcichthys elongatus	Demersal
Fukushima	23.977	141.041	37.6402	Demersal	Flathead	Platycephalus sp.	2011-08-01	150			Fat greenling	Hexagrammos otakii	Demersal
Fukushima	23.977	141.041	37.6402	Demersal	Ocellate spot skate	Okamejei kenojei	2011-08-01	73			Finepatterned puffer	Takifugu poecilonotus	Demersal
Fukushima	23.977	141.041	37.6402	Demersal	Nibe croaker	Nibea mitsukurii	2011-08-01	160			Flatfish		Demersal
Fukushima	23.977	141.041	37.6402	Demersal	Black cow-tongue	Paraplagusia japonica	2011-08-01	68			Flathead	Platycephalus sp.	Demersal
Fukushima	23.977	141.041	37.6402	Demersal	Fat greenling	Hexagrammos otakii	2011-08-08	85			Flathead flounder	Hippoglossoides dubius	Demersal
Fukushima	25.3969	140.964	37.646	Demersal	Ayu sweetfish	Plecoglossus altivelis altivelis	2011-08-08	940			Flounder	Pleuronichthys japonicus	Demersal
Fukushima	23.977	141.041	37.6402	Demersal	Olive flounder	Paralichthys olivaceus	2011-08-08	70			Fox jacopever	Sebastes vulpes	Demersal
Fukushima	23.977	141.041	37.6402	Demersal	Stone flounder	Kareius bicoloratus	2011-08-08	90			Globefish	Takifugu porphyreus	Demersal
Fukushima	23.977	141.041	37.6402	Demersal	Slime flounder	Microstomus achne	2011-08-08	23			Goldeye rockfish	Sebastes thompsoni	Demersal
Fukushima	23.977	141.041	37.6402	Demersal	Marbled flounder	Pleuronectes yokohamae	2011-08-08	36			Greeneyes	Chlorophthalmus borealis	Demersal
Fukushima	23.977	141.041	37.6402	Demersal	Littlemouth flounder	Pleuronectes herzensteini	2011-08-08	22			Gurnard	Chelidonichthys spinosus	Demersal
Fukushima	23.977	141.041	37.6402	Demersal	Japanese black porgy	Acanthopagrus schlegelii	2011-08-08	70			Halfbeak	Hemiramphus sajori	Demersal
Fukushima	23.977	141.041	37.6402	Demersal	Flathead	Platycephalus sp.	2011-08-08	110			Hilgendorf saucord	Helicolenus hilgendorfii	Demersal
Fukushima	23.977	141.041	37.6402	Demersal	Gurnard	Chelidonichthys spinosus	2011-08-08	61			Ishikawa icefish	Salangichthys ishikawae	Demersal
Fukushima	23.977	141.041	37.6402	Demersal	Nibe croaker	Nibea mitsukurii	2011-08-08	180			Japanese black porgy	Acanthopagrus schlegelii	Demersal
Fukushima	23.977	141.041	37.6402	Demersal	Fat greenling	Hexagrammos otakii	2011-08-22	87			Japanese black rockfish	Sebastes cheni	Demersal
Fukushima	23.977	141.041	37.6402	Demersal	Fat greenling	Hexagrammos otakii	2011-08-22	90			Japanese bullhead shark	Heterodontus japonicus	Demersal
Fukushima	23.977	141.041	37.6402	Demersal	Monkfish	Lophiomus setigerus	2011-08-22	51			Japanese eagle ray	Myliobatis tobijei	Demersal
Fukushima	23.977	141.041	37.6402	Demersal	Olive flounder	Paralichthys olivaceus	2011-08-22	95			Japanese gissu	Pterothrissus gissu	Demersal
Fukushima	23.977	141.041	37.6402	Demersal	Rikuzen flounder	Dexistes rikuzenius	2011-08-22	7.6			Japanese sandlance	Ammodytes personatus	Demersal
Fukushima	23.977	141.041	37.6402	Demersal	Slime flounder	Microstomus achne	2011-08-22	59			Japanese whiting	Sillago japonica	Demersal
Fukushima	23.977	141.041	37.6402	Demersal	Slime flounder	Microstomus achne	2011-08-22	19			John Dory	Zeus faber	Demersal
Fukushima	23.977	141.041	37.6402	Demersal	Brown hakeling	Physiculus maximowiczi	2011-08-22	230			Kamchatka flounder	Atheresthes evermanni	Demersal
Fukushima	23.977	141.041	37.6402	Demersal	Brown hakeling	Physiculus maximowiczi	2011-08-22	20			Korean rockfish	Sebastes schlegelii	Demersal
Fukushima	23.977	141.041	37.6402	Demersal	Littlemouth flounder	Pleuronectes herzensteini	2011-08-22	32			Kuromutsu-gnomefish	Scombrops gilberti	Demersal
Fukushima	23.977	141.041	37.6402	Demersal	Redwing searobin	Lepidotrigla microptera	2011-08-22	45			Littlemouth flounder	Pleuronectes herzensteini	Demersal
Fukushima	23.977	141.041	37.6402	Demersal	John Dory	Zeus faber	2011-08-22	15			Littlemouth flounder	Pseudopleuronectes herzensteini	Demersal
Fukushima	23.977	141.041	37.6402	Demersal	Nibe croaker	Nibea mitsukurii	2011-08-22	160			Long shanny	Stichaeus grigorjewi	Demersal
Fukushima	23.977	141.041	37.6402	Demersal	Fat greenling	Hexagrammos otakii	2011-08-29	22			Longarm grenadier	Coelorinchus macrochir	Demersal
Fukushima	23.977	141.041	37.6402	Demersal	Fat greenling	Hexagrammos otakii	2011-08-29	160			Marbled flounder	Pleuronectes yokohamae	Demersal
Fukushima	23.977	141.041	37.6402	Demersal	Monkfish	Lophiomus setigerus	2011-08-29	17			Marbled sole	Pseudopleuronectes yokohamae	Demersal
Fukushima	23.977	141.041	37.6402	Demersal	Monkfish	Lophiomus setigerus	2011-08-29	28			Monkfish	Lophiomus setigerus	Demersal
Fukushima	23.977	141.041	37.6402	Demersal	Olive flounder	Paralichthys olivaceus	2011-08-29	57			Monkfish	Lophius litulon	Demersal
Fukushima	23.977	141.041	37.6402	Demersal	Slime flounder	Microstomus achne	2011-08-29	23			Nibe croaker	Nibea mitsukurii	Demersal
Fukushima	23.977	141.041	37.6402	Demersal	Slime flounder	Microstomus achne	2011-08-29	23			Ocellate spot skate	Okamejei kenojei	Demersal
Fukushima	23.977	141.041	37.6402	Demersal	Brown hakeling	Physiculus maximowiczi	2011-08-29	36			Olive flounder	Paralichthys olivaceus	Demersal
Fukushima	23.977	141.041	37.6402	Demersal	Marbled flounder	Pleuronectes yokohamae	2011-08-29	17			Owston's rockfish	Sebastes owstoni	Demersal
Fukushima	23.977	141.041	37.6402	Demersal	Littlemouth flounder	Pleuronectes herzensteini	2011-08-29	27			Pacific barrelfish	Hyperoglyphe japonica	Demersal
Fukushima	23.977	141.041	37.6402	Demersal	Gurnard	Chelidonichthys spinosus	2011-08-29	240			Pacific cod	Gadus macrocephalus	Demersal
Fukushima	23.977	141.041	37.6402	Demersal	John Dory	Zeus faber	2011-08-29	12			Pacific saury	Cololabis saira	Demersal
Fukushima	23.977	141.041	37.6402	Demersal	John Dory	Zeus faber	2011-08-29	34			Panther puffer	Takifugu pardalis	Demersal
Fukushima	23.977	141.041	37.6402	Demersal	Vermiculated puffer	Takifugu snyderi	2011-08-29	28			Pitted stingray	Dasyatis matsubarai	Demersal
Fukushima	23.977	141.041	37.6402	Demersal	Fat greenling	Hexagrammos otakii	2011-09-05	18			Poacher	Occella iburia	Demersal
Fukushima	23.977	141.041	37.6402	Demersal	Monkfish	Lophiomus setigerus	2011-09-05	28			Pointhead flounder	Cleisthenes herzensteini	Demersal
Fukushima	23.977	141.041	37.6402	Demersal	Stone flounder	Kareius bicoloratus	2011-09-05	550			Red barracuda	Sphyraena pinguis	Demersal
Fukushima	23.977	141.041	37.6402	Demersal	Slime flounder	Microstomus achne	2011-09-05	35			Red seabream	Pagrus major	Demersal
Fukushima	23.977	141.041	37.6402	Demersal	Willowy flounder	Tanakius kitaharai	2011-09-05	14			Red stingray	Dasyatis akajei	Demersal
Fukushima	23.977	141.041	37.6402	Demersal	Littlemouth flounder	Pleuronectes herzensteini	2011-09-05	23			Red tongue sole	Cynoglossus joyneri	Demersal
Fukushima	23.977	141.041	37.6402	Demersal	Redwing searobin	Lepidotrigla microptera	2011-09-05	73			Redwing searobin	Lepidotrigla microptera	Demersal
Fukushima	23.977	141.041	37.6402	Demersal	Crimson sea bream	Evynnis japonica	2011-09-05	9.3			Ridged-eye flounder	Pleuronichthys cornutus	Demersal
Fukushima	23.977	141.041	37.6402	Demersal	Shotted halibut	Eopsetta grigorjewi	2011-09-05	26			Rikuzen flounder	Dexistes rikuzenius	Demersal
Fukushima	23.977	141.041	37.6402	Demersal	Dory	Zenopsis nebulosa	2011-09-05	28			Rockfish	Sebastes nudus	Demersal
Fukushima	23.977	141.041	37.6402	Demersal	Fat greenling	Hexagrammos otakii	2011-09-10	120			Rosy seabass	Doederleinia berycoides	Demersal
Fukushima	23.977	141.041	37.6402	Demersal	Fat greenling	Hexagrammos otakii	2011-09-10	62			Roughscale sole	Clidoderma asperrimum	Demersal
Fukushima	23.977	141.041	37.6402	Demersal	Seabass	Lateolabrax japonicus	2011-09-10	370			Scorpion fish	Sebastiscus marmoratus	Demersal
Fukushima	23.977	141.041	37.6402	Demersal	Olive flounder	Paralichthys olivaceus	2011-09-10	96			Sea dragonet	Repomucenus ornatipinnis	Demersal
Fukushima	23.977	141.041	37.6402	Demersal	Olive flounder	Paralichthys olivaceus	2011-09-10	880			Sea raven	Hemitripterus villosus	Demersal
Fukushima	23.977	141.041	37.6402	Demersal	Rikuzen flounder	Dexistes rikuzenius	2011-09-10	12			Sea robin		Demersal
Fukushima	23.977	141.041	37.6402	Demersal	Slime flounder	Microstomus achne	2011-09-10	40			Seabass	Lateolabrax japonicus	Demersal
Fukushima	23.977	141.041	37.6402	Demersal	Slime flounder	Microstomus achne	2011-09-10	32			Shotted halibut	Eopsetta grigorjewi	Demersal
Fukushima	23.977	141.041	37.6402	Demersal	Slime flounder	Microstomus achne	2011-09-10	29			Silver Croaker	Argyrosomus argentatus	Demersal
Fukushima	23.977	141.041	37.6402	Demersal	Willowy flounder	Tanakius kitaharai	2011-09-10	39			Silver croaker	Pennahia argentata	Demersal
Fukushima	23.977	141.041	37.6402	Demersal	Brown hakeling	Physiculus maximowiczi	2011-09-10	110			Slime flounder	Microstomus achne	Demersal
Fukushima	23.977	141.041	37.6402	Demersal	Marbled flounder	Pleuronectes yokohamae	2011-09-10	56			Slippery sole	Microstomus Pacificus	Demersal
Fukushima	23.977	141.041	37.6402	Demersal	Littlemouth flounder	Pleuronectes herzensteini	2011-09-10	31			Snailfish		Demersal
Fukushima	23.977	141.041	37.6402	Demersal	Littlemouth flounder	Pleuronectes herzensteini	2011-09-10	48			Sohachi flounder	Cleisthenes pinetorum	Demersal
Fukushima	23.977	141.041	37.6402	Demersal	Redwing searobin	Lepidotrigla microptera	2011-09-10	28			Spiny dogfish	Squalus acanthias	Demersal
Fukushima	23.977	141.041	37.6402	Demersal	Red seabream	Pagrus major	2011-09-10	17			Spotted halibut	Verasper variegatus	Demersal
Fukushima	23.977	141.041	37.6402	Demersal	Flathead	Platycephalus sp.	2011-09-10	120			Spotted Knifejaw	Oplegnathus punctatus	Demersal
Fukushima	23.977	141.041	37.6402	Demersal	Gurnard	Chelidonichthys spinosus	2011-09-10	43			Starry flounder	Platichthys stellatus	Demersal
Fukushima	23.977	141.041	37.6402	Demersal	Ocellate spot skate	Okamejei kenojei	2011-09-10	91			Starspotted smooth-hound	Mustelus manazo	Demersal
Fukushima	23.977	141.041	37.6402	Demersal	Tanaka's snailfish	Liparis tanakae	2011-09-10	16			Stone flounder	Kareius bicoloratus	Demersal
Fukushima	23.977	141.041	37.6402	Demersal	Japanese black rockfish	Sebastes cheni	2011-09-10	160			Striped jewfish	Stereolepis doederleini	Demersal
Fukushima	23.977	141.041	37.6402	Demersal	Nibe croaker	Nibea mitsukurii	2011-09-10	110			Surfperch	Ditrema temminckii temminckii	Demersal
Fukushima	23.977	141.041	37.6402	Demersal	Dory	Zenopsis nebulosa	2011-09-10	34			Tanaka's snailfish	Liparis tanakae	Demersal
Fukushima	23.977	141.041	37.6402	Demersal	Fat greenling	Hexagrammos otakii	2011-09-15	41			Tiger puffer	Takifugu rubripes	Demersal
Fukushima	23.977	141.041	37.6402	Demersal	Monkfish	Lophiomus setigerus	2011-09-15	60			Vermiculated puffer	Takifugu snyderi	Demersal
Fukushima	23.977	141.041	37.6402	Demersal	Monkfish	Lophiomus setigerus	2011-09-15	29			Whitespotted char	Salvelinus leucomaenis	Demersal
Fukushima	23.977	141.041	37.6402	Demersal	Ridged-eye flounder	Pleuronichthys cornutus	2011-09-15	18			Willowy flounder	Tanakius kitaharai	Demersal
Fukushima	23.977	141.041	37.6402	Demersal	Ridged-eye flounder	Pleuronichthys cornutus	2011-09-15	11
Fukushima	23.977	141.041	37.6402	Demersal	Conger eel	Conger myriaster	2011-09-15	13
Fukushima	23.977	141.041	37.6402	Demersal	Slime flounder	Microstomus achne	2011-09-15	13
Fukushima	23.977	141.041	37.6402	Demersal	Slime flounder	Microstomus achne	2011-09-15	11
Fukushima	23.977	141.041	37.6402	Demersal	Littlemouth flounder	Pleuronectes herzensteini	2011-09-15	30
Fukushima	23.977	141.041	37.6402	Demersal	Redwing searobin	Lepidotrigla microptera	2011-09-15	34
Fukushima	23.977	141.041	37.6402	Demersal	Shotted halibut	Eopsetta grigorjewi	2011-09-15	98
Fukushima	23.977	141.041	37.6402	Demersal	Shotted halibut	Eopsetta grigorjewi	2011-09-15	25
Fukushima	23.977	141.041	37.6402	Demersal	John Dory	Zeus faber	2011-09-15	12
Fukushima	23.977	141.041	37.6402	Demersal	John Dory	Zeus faber	2011-09-15	120
Fukushima	23.977	141.041	37.6402	Demersal	Tanaka's snailfish	Liparis tanakae	2011-09-15	22
Fukushima	23.977	141.041	37.6402	Demersal	Dory	Zenopsis nebulosa	2011-09-15	31
Fukushima	23.977	141.041	37.6402	Demersal	Dory	Zenopsis nebulosa	2011-09-15	25
Fukushima	23.977	141.041	37.6402	Demersal	Olive flounder	Paralichthys olivaceus	2011-09-24	68
Fukushima	23.977	141.041	37.6402	Demersal	Ridged-eye flounder	Pleuronichthys cornutus	2011-09-24	8.8
Fukushima	23.977	141.041	37.6402	Demersal	Conger eel	Conger myriaster	2011-09-24	32
Fukushima	23.977	141.041	37.6402	Demersal	Slime flounder	Microstomus achne	2011-09-24	59
Fukushima	23.977	141.041	37.6402	Demersal	Marbled flounder	Pleuronectes yokohamae	2011-09-24	35
Fukushima	23.977	141.041	37.6402	Demersal	Littlemouth flounder	Pleuronectes herzensteini	2011-09-24	25
Fukushima	23.977	141.041	37.6402	Demersal	Littlemouth flounder	Pleuronectes herzensteini	2011-09-24	31
Fukushima	23.977	141.041	37.6402	Demersal	Redwing searobin	Lepidotrigla microptera	2011-09-24	30
Fukushima	23.977	141.041	37.6402	Demersal	Redwing searobin	Lepidotrigla microptera	2011-09-24	58
Fukushima	23.977	141.041	37.6402	Demersal	Crimson sea bream	Evynnis japonica	2011-09-24	11
Fukushima	23.977	141.041	37.6402	Demersal	Shotted halibut	Eopsetta grigorjewi	2011-09-24	32
Fukushima	23.977	141.041	37.6402	Demersal	Shotted halibut	Eopsetta grigorjewi	2011-09-24	20
Fukushima	23.977	141.041	37.6402	Demersal	Globefish	Takifugu porphyreus	2011-09-24	32
Fukushima	23.977	141.041	37.6402	Demersal	Globefish	Takifugu porphyreus	2011-09-24	38
Fukushima	23.977	141.041	37.6402	Demersal	Gurnard	Chelidonichthys spinosus	2011-09-24	75
Fukushima	23.977	141.041	37.6402	Demersal	Gurnard	Chelidonichthys spinosus	2011-09-24	43
Fukushima	23.977	141.041	37.6402	Demersal	John Dory	Zeus faber	2011-09-24	200
Fukushima	23.977	141.041	37.6402	Demersal	John Dory	Zeus faber	2011-09-24	38
Fukushima	23.977	141.041	37.6402	Demersal	Flounder	Pleuronichthys japonicus	2011-09-24	10
Fukushima	23.977	141.041	37.6402	Demersal	Dory	Zenopsis nebulosa	2011-09-24	38
Fukushima	23.977	141.041	37.6402	Demersal	Dory	Zenopsis nebulosa	2011-09-24	30
Fukushima	23.977	141.041	37.6402	Demersal	Fat greenling	Hexagrammos otakii	2011-09-24	38
Fukushima	23.977	141.041	37.6402	Demersal	Fat greenling	Hexagrammos otakii	2011-09-24	36
Fukushima	23.977	141.041	37.6402	Demersal	Olive flounder	Paralichthys olivaceus	2011-09-24	120
Fukushima	23.7828	141.025	37.2114	Demersal	Marbled flounder	Pleuronectes yokohamae	2011-09-27	200
Fukushima	23.977	141.041	37.6402	Demersal	Crimson sea bream	Evynnis japonica	2011-09-30	19
Fukushima	23.977	141.041	37.6402	Demersal	Japanese black rockfish	Sebastes cheni	2011-09-30	49
Fukushima	23.977	141.041	37.6402	Demersal	Japanese sandlance	Ammodytes personatus	2011-09-30	230
Fukushima	23.977	141.041	37.6402	Demersal	Stone flounder	Kareius bicoloratus	2011-09-30	130
Fukushima	23.977	141.041	37.6402	Demersal	Marbled flounder	Pleuronectes yokohamae	2011-09-30	34
Fukushima	23.977	141.041	37.6402	Demersal	Gurnard	Chelidonichthys spinosus	2011-10-01	87
Fukushima	23.977	141.041	37.6402	Demersal	John Dory	Zeus faber	2011-10-01	53
Fukushima	23.977	141.041	37.6402	Demersal	Fat greenling	Hexagrammos otakii	2011-10-01	28
Fukushima	23.977	141.041	37.6402	Demersal	Olive flounder	Paralichthys olivaceus	2011-10-01	21
Fukushima	23.977	141.041	37.6402	Demersal	Slime flounder	Microstomus achne	2011-10-01	26
Fukushima	23.977	141.041	37.6402	Demersal	Willowy flounder	Tanakius kitaharai	2011-10-01	14
Fukushima	23.977	141.041	37.6402	Demersal	Marbled flounder	Pleuronectes yokohamae	2011-10-01	50
Fukushima	23.977	141.041	37.6402	Demersal	Fat greenling	Hexagrammos otakii	2011-10-03	74
Fukushima	23.977	141.041	37.6402	Demersal	Olive flounder	Paralichthys olivaceus	2011-10-03	86
Fukushima	23.977	141.041	37.6402	Demersal	Marbled flounder	Pleuronectes yokohamae	2011-10-03	56
Fukushima	23.977	141.041	37.6402	Demersal	Ocellate spot skate	Okamejei kenojei	2011-10-03	67
Fukushima	23.977	141.041	37.6402	Demersal	John Dory	Zeus faber	2011-10-03	50
Fukushima	23.977	141.041	37.6402	Demersal	Fat greenling	Hexagrammos otakii	2011-10-06	130
Fukushima	23.977	141.041	37.6402	Demersal	Monkfish	Lophiomus setigerus	2011-10-06	75
Fukushima	23.977	141.041	37.6402	Demersal	Olive flounder	Paralichthys olivaceus	2011-10-06	16
Fukushima	23.977	141.041	37.6402	Demersal	Olive flounder	Paralichthys olivaceus	2011-10-06	150
Fukushima	23.977	141.041	37.6402	Demersal	Conger eel	Conger myriaster	2011-10-06	14
Fukushima	23.977	141.041	37.6402	Demersal	Stone flounder	Kareius bicoloratus	2011-10-06	93
Fukushima	23.977	141.041	37.6402	Demersal	Slime flounder	Microstomus achne	2011-10-06	30
Fukushima	23.977	141.041	37.6402	Demersal	Slime flounder	Microstomus achne	2011-10-06	66
Fukushima	23.977	141.041	37.6402	Demersal	Brown hakeling	Physiculus maximowiczi	2011-10-06	68
Fukushima	23.977	141.041	37.6402	Demersal	Marbled flounder	Pleuronectes yokohamae	2011-10-06	13
Fukushima	23.977	141.041	37.6402	Demersal	Littlemouth flounder	Pleuronectes herzensteini	2011-10-06	21
Fukushima	23.977	141.041	37.6402	Demersal	Littlemouth flounder	Pleuronectes herzensteini	2011-10-06	53
Fukushima	23.977	141.041	37.6402	Demersal	Redwing searobin	Lepidotrigla microptera	2011-10-06	38
Fukushima	23.977	141.041	37.6402	Demersal	Redwing searobin	Lepidotrigla microptera	2011-10-06	48
Fukushima	23.977	141.041	37.6402	Demersal	Red seabream	Pagrus major	2011-10-06	49
Fukushima	23.977	141.041	37.6402	Demersal	Shotted halibut	Eopsetta grigorjewi	2011-10-06	15
Fukushima	23.977	141.041	37.6402	Demersal	Globefish	Takifugu porphyreus	2011-10-06	50
Fukushima	23.977	141.041	37.6402	Demersal	Gurnard	Chelidonichthys spinosus	2011-10-06	15
Fukushima	23.977	141.041	37.6402	Demersal	Gurnard	Chelidonichthys spinosus	2011-10-06	42
Fukushima	23.977	141.041	37.6402	Demersal	John Dory	Zeus faber	2011-10-06	22
Fukushima	23.977	141.041	37.6402	Demersal	John Dory	Zeus faber	2011-10-06	28
Fukushima	23.977	141.041	37.6402	Demersal	Japanese black rockfish	Sebastes cheni	2011-10-06	79
Fukushima	23.977	141.041	37.6402	Demersal	Vermiculated puffer	Takifugu snyderi	2011-10-06	17
Fukushima	23.977	141.041	37.6402	Demersal	Flounder	Pleuronichthys japonicus	2011-10-06	21
Fukushima	23.977	141.041	37.6402	Demersal	Dory	Zenopsis nebulosa	2011-10-06	69
Fukushima	23.977	141.041	37.6402	Demersal	Fat greenling	Hexagrammos otakii	2011-10-07	47
Fukushima	23.977	141.041	37.6402	Demersal	Olive flounder	Paralichthys olivaceus	2011-10-14	68
Fukushima	23.977	141.041	37.6402	Demersal	Ridged-eye flounder	Pleuronichthys cornutus	2011-10-14	36
Fukushima	23.977	141.041	37.6402	Demersal	Marbled flounder	Pleuronectes yokohamae	2011-10-14	80
Fukushima	23.977	141.041	37.6402	Demersal	Gurnard	Chelidonichthys spinosus	2011-10-14	33
Fukushima	23.977	141.041	37.6402	Demersal	Ocellate spot skate	Okamejei kenojei	2011-10-14	99
Fukushima	23.977	141.041	37.6402	Demersal	Japanese black rockfish	Sebastes cheni	2011-10-14	210
Fukushima	23.977	141.041	37.6402	Demersal	Fat greenling	Hexagrammos otakii	2011-10-14	96
Fukushima	23.7828	141.025	37.2114	Demersal	Olive flounder	Paralichthys olivaceus	2011-10-17	42
Fukushima	23.7828	141.025	37.2114	Demersal	Olive flounder	Paralichthys olivaceus	2011-10-17	39
Fukushima	23.7828	141.025	37.2114	Demersal	Conger eel	Conger myriaster	2011-10-17	67
Fukushima	23.7828	141.025	37.2114	Demersal	Starspotted smooth-hound	Mustelus manazo	2011-10-17	30
Fukushima	23.7828	141.025	37.2114	Demersal	Stone flounder	Kareius bicoloratus	2011-10-17	13
Fukushima	23.7828	141.025	37.2114	Demersal	Marbled flounder	Pleuronectes yokohamae	2011-10-17	290
Fukushima	23.7828	141.025	37.2114	Demersal	Marbled flounder	Pleuronectes yokohamae	2011-10-17	100
Fukushima	23.7828	141.025	37.2114	Demersal	Marbled flounder	Pleuronectes yokohamae	2011-10-17	170
Fukushima	23.7828	141.025	37.2114	Demersal	Littlemouth flounder	Pleuronectes herzensteini	2011-10-17	81
Fukushima	23.7828	141.025	37.2114	Demersal	Redwing searobin	Lepidotrigla microptera	2011-10-17	110
Fukushima	23.7828	141.025	37.2114	Demersal	Redwing searobin	Lepidotrigla microptera	2011-10-17	73
Fukushima	23.7828	141.025	37.2114	Demersal	Japanese black porgy	Acanthopagrus schlegelii	2011-10-17	34
Fukushima	23.7828	141.025	37.2114	Demersal	Crimson sea bream	Evynnis japonica	2011-10-17	10
Fukushima	23.7828	141.025	37.2114	Demersal	Globefish	Takifugu porphyreus	2011-10-17	53
Fukushima	23.7828	141.025	37.2114	Demersal	Gurnard	Chelidonichthys spinosus	2011-10-17	44
Fukushima	23.7828	141.025	37.2114	Demersal	Ocellate spot skate	Okamejei kenojei	2011-10-17	170
Fukushima	23.7828	141.025	37.2114	Demersal	Ocellate spot skate	Okamejei kenojei	2011-10-17	700
Fukushima	23.7828	141.025	37.2114	Demersal	Ocellate spot skate	Okamejei kenojei	2011-10-17	200
Fukushima	23.7828	141.025	37.2114	Demersal	Ocellate spot skate	Okamejei kenojei	2011-10-17	400
Fukushima	23.7828	141.025	37.2114	Demersal	Red stingray	Dasyatis akajei	2011-10-17	140
Fukushima	23.7828	141.025	37.2114	Demersal	John Dory	Zeus faber	2011-10-17	22
Fukushima	23.7828	141.025	37.2114	Demersal	Nibe croaker	Nibea mitsukurii	2011-10-17	150
Fukushima	23.7828	141.025	37.2114	Demersal	Vermiculated puffer	Takifugu snyderi	2011-10-17	96
Fukushima	23.7828	141.025	37.2114	Demersal	Flounder	Pleuronichthys japonicus	2011-10-17	40
Fukushima	23.7828	141.025	37.2114	Demersal	Striped jewfish	Stereolepis doederleini	2011-10-17	31
Fukushima	23.7828	141.025	37.2114	Demersal	Fat greenling	Hexagrammos otakii	2011-10-17	310
Fukushima	23.977	141.041	37.6402	Demersal	Fat greenling	Hexagrammos otakii	2011-10-17	40
Fukushima	23.7828	141.025	37.2114	Demersal	Fat greenling	Hexagrammos otakii	2011-10-17	330
Fukushima	23.977	141.041	37.6402	Demersal	Olive flounder	Paralichthys olivaceus	2011-10-17	120
Fukushima	23.977	141.041	37.6402	Demersal	Stone flounder	Kareius bicoloratus	2011-10-17	110
Fukushima	23.977	141.041	37.6402	Demersal	Willowy flounder	Tanakius kitaharai	2011-10-17	38
Fukushima	23.977	141.041	37.6402	Demersal	Littlemouth flounder	Pleuronectes herzensteini	2011-10-17	23
Fukushima	23.977	141.041	37.6402	Demersal	Redwing searobin	Lepidotrigla microptera	2011-10-17	43
Fukushima	23.977	141.041	37.6402	Demersal	Globefish	Takifugu porphyreus	2011-10-17	34
Fukushima	23.977	141.041	37.6402	Demersal	John Dory	Zeus faber	2011-10-17	33
Fukushima	23.7828	141.025	37.2114	Demersal	Seabass	Lateolabrax japonicus	2011-10-17	70
Fukushima	23.977	141.041	37.6402	Demersal	Flounder	Pleuronichthys japonicus	2011-10-17	14
Fukushima	23.7828	141.025	37.2114	Demersal	Olive flounder	Paralichthys olivaceus	2011-10-17	27
Fukushima	23.7828	141.025	37.2114	Demersal	Olive flounder	Paralichthys olivaceus	2011-10-17	270
Fukushima	23.977	141.041	37.6402	Demersal	Slime flounder	Microstomus achne	2011-10-19	30
Fukushima	23.977	141.041	37.6402	Demersal	Marbled flounder	Pleuronectes yokohamae	2011-10-19	36
Fukushima	23.977	141.041	37.6402	Demersal	Crimson sea bream	Evynnis japonica	2011-10-19	34
Fukushima	23.977	141.041	37.6402	Demersal	Ocellate spot skate	Okamejei kenojei	2011-10-19	30
Fukushima	23.977	141.041	37.6402	Demersal	Olive flounder	Paralichthys olivaceus	2011-10-19	30
Fukushima	23.977	141.041	37.6402	Demersal	Fat greenling	Hexagrammos otakii	2011-10-20	150
Fukushima	23.977	141.041	37.6402	Demersal	Nibe croaker	Nibea mitsukurii	2011-10-20	110
Fukushima	23.977	141.041	37.6402	Demersal	Olive flounder	Paralichthys olivaceus	2011-10-20	39
Fukushima	23.977	141.041	37.6402	Demersal	Stone flounder	Kareius bicoloratus	2011-10-20	73
Fukushima	23.977	141.041	37.6402	Demersal	Brown hakeling	Physiculus maximowiczi	2011-10-20	170
Fukushima	23.977	141.041	37.6402	Demersal	Marbled flounder	Pleuronectes yokohamae	2011-10-20	60
Fukushima	23.977	141.041	37.6402	Demersal	Red seabream	Pagrus major	2011-10-20	33
Fukushima	23.977	141.041	37.6402	Demersal	Gurnard	Chelidonichthys spinosus	2011-10-20	52
Fukushima	23.977	141.041	37.6402	Demersal	Ocellate spot skate	Okamejei kenojei	2011-10-20	140
Fukushima	23.977	141.041	37.6402	Demersal	John Dory	Zeus faber	2011-10-20	26
Fukushima	23.977	141.041	37.6402	Demersal	Fat greenling	Hexagrammos otakii	2011-10-24	120
Fukushima	23.977	141.041	37.6402	Demersal	Olive flounder	Paralichthys olivaceus	2011-10-24	140
Fukushima	23.977	141.041	37.6402	Demersal	Olive flounder	Paralichthys olivaceus	2011-10-24	31
Fukushima	23.977	141.041	37.6402	Demersal	Ridged-eye flounder	Pleuronichthys cornutus	2011-10-24	12
Fukushima	23.977	141.041	37.6402	Demersal	Conger eel	Conger myriaster	2011-10-24	30
Fukushima	23.977	141.041	37.6402	Demersal	Slime flounder	Microstomus achne	2011-10-24	13
Fukushima	23.977	141.041	37.6402	Demersal	Sea raven	Hemitripterus villosus	2011-10-24	20
Fukushima	23.977	141.041	37.6402	Demersal	Marbled flounder	Pleuronectes yokohamae	2011-10-24	26
Fukushima	23.977	141.041	37.6402	Demersal	Marbled flounder	Pleuronectes yokohamae	2011-10-24	150
Fukushima	23.977	141.041	37.6402	Demersal	Littlemouth flounder	Pleuronectes herzensteini	2011-10-24	49
Fukushima	23.977	141.041	37.6402	Demersal	Littlemouth flounder	Pleuronectes herzensteini	2011-10-24	21
Fukushima	23.977	141.041	37.6402	Demersal	Redwing searobin	Lepidotrigla microptera	2011-10-24	30
Fukushima	23.977	141.041	37.6402	Demersal	Redwing searobin	Lepidotrigla microptera	2011-10-24	17
Fukushima	23.977	141.041	37.6402	Demersal	Crimson sea bream	Evynnis japonica	2011-10-24	13
Fukushima	23.977	141.041	37.6402	Demersal	Shotted halibut	Eopsetta grigorjewi	2011-10-24	23
Fukushima	23.977	141.041	37.6402	Demersal	Globefish	Takifugu porphyreus	2011-10-24	35
Fukushima	23.977	141.041	37.6402	Demersal	Gurnard	Chelidonichthys spinosus	2011-10-24	30
Fukushima	23.977	141.041	37.6402	Demersal	John Dory	Zeus faber	2011-10-24	33
Fukushima	23.977	141.041	37.6402	Demersal	John Dory	Zeus faber	2011-10-24	15
Fukushima	23.977	141.041	37.6402	Demersal	Flounder	Pleuronichthys japonicus	2011-10-24	16
Fukushima	23.977	141.041	37.6402	Demersal	Flounder	Pleuronichthys japonicus	2011-10-24	9.4
Fukushima	23.977	141.041	37.6402	Demersal	Dory	Zenopsis nebulosa	2011-10-24	26
Fukushima	23.977	141.041	37.6402	Demersal	Dory	Zenopsis nebulosa	2011-10-24	27
Fukushima	23.7828	141.025	37.2114	Demersal	Japanese black rockfish	Sebastes cheni	2011-10-24	1300
Fukushima	23.977	141.041	37.6402	Demersal	Stone flounder	Kareius bicoloratus	2011-10-29	72
Fukushima	23.977	141.041	37.6402	Demersal	Littlemouth flounder	Pleuronectes herzensteini	2011-10-29	32
Fukushima	23.977	141.041	37.6402	Demersal	Gurnard	Chelidonichthys spinosus	2011-10-29	36
Fukushima	6.43311	141.05	37.4814	Demersal	Fat greenling	Hexagrammos otakii	2011-10-29	35
Fukushima	6.43311	141.05	37.4814	Demersal	Monkfish	Lophiomus setigerus	2011-10-29	29
Fukushima	6.43311	141.05	37.4814	Demersal	Olive flounder	Paralichthys olivaceus	2011-10-29	27
Fukushima	6.43311	141.05	37.4814	Demersal	Conger eel	Conger myriaster	2011-10-29	23
Fukushima	6.43311	141.05	37.4814	Demersal	Willowy flounder	Tanakius kitaharai	2011-10-29	49
Fukushima	6.43311	141.05	37.4814	Demersal	Littlemouth flounder	Pleuronectes herzensteini	2011-10-29	68
Fukushima	6.43311	141.05	37.4814	Demersal	Redwing searobin	Lepidotrigla microptera	2011-10-29	11
Fukushima	6.43311	141.05	37.4814	Demersal	Shotted halibut	Eopsetta grigorjewi	2011-10-29	100
Fukushima	6.43311	141.05	37.4814	Demersal	John Dory	Zeus faber	2011-10-29	7.6
Fukushima	6.43311	141.05	37.4814	Demersal	Rosy seabass	Doederleinia berycoides	2011-10-29	14
Fukushima	23.977	141.041	37.6402	Demersal	Fat greenling	Hexagrammos otakii	2011-10-29	230
Fukushima	23.977	141.041	37.6402	Demersal	Red barracuda	Sphyraena pinguis	2011-10-29	28
Fukushima	23.977	141.041	37.6402	Demersal	Olive flounder	Paralichthys olivaceus	2011-10-29	66
Fukushima	23.977	141.041	37.6402	Demersal	Sohachi flounder	Cleisthenes pinetorum	2011-11-05	14
Fukushima	23.977	141.041	37.6402	Demersal	Stone flounder	Kareius bicoloratus	2011-11-05	170
Fukushima	23.977	141.041	37.6402	Demersal	Slime flounder	Microstomus achne	2011-11-05	13
Fukushima	23.977	141.041	37.6402	Demersal	Brown hakeling	Physiculus maximowiczi	2011-11-05	14
Fukushima	23.977	141.041	37.6402	Demersal	Sea raven	Hemitripterus villosus	2011-11-05	23
Fukushima	23.977	141.041	37.6402	Demersal	Sea raven	Hemitripterus villosus	2011-11-05	71
Fukushima	23.977	141.041	37.6402	Demersal	Pacific cod	Gadus macrocephalus	2011-11-05	11
Fukushima	23.977	141.041	37.6402	Demersal	Japanese black porgy	Acanthopagrus schlegelii	2011-11-05	13
Fukushima	23.977	141.041	37.6402	Demersal	Red seabream	Pagrus major	2011-11-05	42
Fukushima	23.977	141.041	37.6402	Demersal	Ocellate spot skate	Okamejei kenojei	2011-11-05	88
Fukushima	23.977	141.041	37.6402	Demersal	Hilgendorf saucord	Helicolenus hilgendorfii	2011-11-05	8.8
Fukushima	23.977	141.041	37.6402	Demersal	Nibe croaker	Nibea mitsukurii	2011-11-05	82
Fukushima	23.977	141.041	37.6402	Demersal	Poacher	Occella iburia	2011-11-05	27
Fukushima	23.977	141.041	37.6402	Demersal	Fat greenling	Hexagrammos otakii	2011-11-05	180
Fukushima	23.977	141.041	37.6402	Demersal	Olive flounder	Paralichthys olivaceus	2011-11-05	110
Fukushima	23.7828	141.025	37.2114	Demersal	Olive flounder	Paralichthys olivaceus	2011-11-07	130
Fukushima	23.7828	141.025	37.2114	Demersal	Olive flounder	Paralichthys olivaceus	2011-11-07	170
Fukushima	23.7828	141.025	37.2114	Demersal	Ridged-eye flounder	Pleuronichthys cornutus	2011-11-07	260
Fukushima	23.7828	141.025	37.2114	Demersal	Conger eel	Conger myriaster	2011-11-07	99
Fukushima	23.7828	141.025	37.2114	Demersal	Stone flounder	Kareius bicoloratus	2011-11-07	37
Fukushima	23.7828	141.025	37.2114	Demersal	Stone flounder	Kareius bicoloratus	2011-11-07	85
Fukushima	23.7828	141.025	37.2114	Demersal	Slime flounder	Microstomus achne	2011-11-07	220
Fukushima	23.7828	141.025	37.2114	Demersal	Marbled flounder	Pleuronectes yokohamae	2011-11-07	190
Fukushima	23.7828	141.025	37.2114	Demersal	Marbled flounder	Pleuronectes yokohamae	2011-11-07	280
Fukushima	23.7828	141.025	37.2114	Demersal	Redwing searobin	Lepidotrigla microptera	2011-11-07	55
Fukushima	23.7828	141.025	37.2114	Demersal	Crimson sea bream	Evynnis japonica	2011-11-07	26
Fukushima	23.7828	141.025	37.2114	Demersal	Gurnard	Chelidonichthys spinosus	2011-11-07	24
Fukushima	23.7828	141.025	37.2114	Demersal	Ocellate spot skate	Okamejei kenojei	2011-11-07	240
Fukushima	23.7828	141.025	37.2114	Demersal	Ocellate spot skate	Okamejei kenojei	2011-11-07	320
Fukushima	23.7828	141.025	37.2114	Demersal	John Dory	Zeus faber	2011-11-07	150
Fukushima	23.7828	141.025	37.2114	Demersal	Japanese black rockfish	Sebastes cheni	2011-11-07	1300
Fukushima	23.7828	141.025	37.2114	Demersal	Vermiculated puffer	Takifugu snyderi	2011-11-07	73
Fukushima	23.7828	141.025	37.2114	Demersal	Fat greenling	Hexagrammos otakii	2011-11-07	98
Fukushima	23.977	141.041	37.6402	Demersal	Olive flounder	Paralichthys olivaceus	2011-11-10	110
Fukushima	23.977	141.041	37.6402	Demersal	Stone flounder	Kareius bicoloratus	2011-11-10	200
Fukushima	23.977	141.041	37.6402	Demersal	Slime flounder	Microstomus achne	2011-11-10	48
Fukushima	23.977	141.041	37.6402	Demersal	Marbled flounder	Pleuronectes yokohamae	2011-11-10	36
Fukushima	23.977	141.041	37.6402	Demersal	Ocellate spot skate	Okamejei kenojei	2011-11-10	140
Fukushima	2.51452	141.046	37.4455	Demersal	Fat greenling	Hexagrammos otakii	2011-11-12	34
Fukushima	2.51452	141.046	37.4455	Demersal	Monkfish	Lophiomus setigerus	2011-11-12	28
Fukushima	2.51452	141.046	37.4455	Demersal	Olive flounder	Paralichthys olivaceus	2011-11-12	160
Fukushima	2.51452	141.046	37.4455	Demersal	Conger eel	Conger myriaster	2011-11-12	32
Fukushima	2.51452	141.046	37.4455	Demersal	Slime flounder	Microstomus achne	2011-11-12	97
Fukushima	2.51452	141.046	37.4455	Demersal	Willowy flounder	Tanakius kitaharai	2011-11-12	10
Fukushima	2.51452	141.046	37.4455	Demersal	Littlemouth flounder	Pleuronectes herzensteini	2011-11-12	110
Fukushima	23.7828	141.025	37.2114	Demersal	Seabass	Lateolabrax japonicus	2011-11-14	54
Fukushima	23.7828	141.025	37.2114	Demersal	Flounder	Pleuronichthys japonicus	2011-11-14	31
Fukushima	23.7828	141.025	37.2114	Demersal	Olive flounder	Paralichthys olivaceus	2011-11-14	110
Fukushima	23.7828	141.025	37.2114	Demersal	Ridged-eye flounder	Pleuronichthys cornutus	2011-11-14	140
Fukushima	23.7828	141.025	37.2114	Demersal	Stone flounder	Kareius bicoloratus	2011-11-14	500
Fukushima	23.7828	141.025	37.2114	Demersal	Marbled flounder	Pleuronectes yokohamae	2011-11-14	200
Fukushima	23.7828	141.025	37.2114	Demersal	Redwing searobin	Lepidotrigla microptera	2011-11-14	70
Fukushima	23.7828	141.025	37.2114	Demersal	Gurnard	Chelidonichthys spinosus	2011-11-14	50
Fukushima	23.7828	141.025	37.2114	Demersal	Ocellate spot skate	Okamejei kenojei	2011-11-14	450
Fukushima	23.977	141.041	37.6402	Demersal	Olive flounder	Paralichthys olivaceus	2011-11-18	160
Fukushima	23.977	141.041	37.6402	Demersal	Olive flounder	Paralichthys olivaceus	2011-11-18	110
Fukushima	23.977	141.041	37.6402	Demersal	Ridged-eye flounder	Pleuronichthys cornutus	2011-11-18	8.2
Fukushima	23.977	141.041	37.6402	Demersal	Conger eel	Conger myriaster	2011-11-18	38
Fukushima	23.977	141.041	37.6402	Demersal	Stone flounder	Kareius bicoloratus	2011-11-18	60
Fukushima	23.977	141.041	37.6402	Demersal	Slime flounder	Microstomus achne	2011-11-18	13
Fukushima	23.977	141.041	37.6402	Demersal	Slime flounder	Microstomus achne	2011-11-18	46
Fukushima	23.977	141.041	37.6402	Demersal	Slime flounder	Microstomus achne	2011-11-18	75
Fukushima	23.977	141.041	37.6402	Demersal	Willowy flounder	Tanakius kitaharai	2011-11-18	9.6
Fukushima	23.977	141.041	37.6402	Demersal	Brown hakeling	Physiculus maximowiczi	2011-11-18	89
Fukushima	23.977	141.041	37.6402	Demersal	Marbled flounder	Pleuronectes yokohamae	2011-11-18	35
Fukushima	23.977	141.041	37.6402	Demersal	Marbled flounder	Pleuronectes yokohamae	2011-11-18	72
Fukushima	23.977	141.041	37.6402	Demersal	Littlemouth flounder	Pleuronectes herzensteini	2011-11-18	22
Fukushima	23.977	141.041	37.6402	Demersal	Littlemouth flounder	Pleuronectes herzensteini	2011-11-18	47
Fukushima	23.977	141.041	37.6402	Demersal	Redwing searobin	Lepidotrigla microptera	2011-11-18	37
Fukushima	23.977	141.041	37.6402	Demersal	Redwing searobin	Lepidotrigla microptera	2011-11-18	16
Fukushima	23.977	141.041	37.6402	Demersal	Crimson sea bream	Evynnis japonica	2011-11-18	12
Fukushima	23.977	141.041	37.6402	Demersal	Gurnard	Chelidonichthys spinosus	2011-11-18	16
Fukushima	23.977	141.041	37.6402	Demersal	Gurnard	Chelidonichthys spinosus	2011-11-18	42
Fukushima	23.977	141.041	37.6402	Demersal	Ocellate spot skate	Okamejei kenojei	2011-11-18	92
Fukushima	23.977	141.041	37.6402	Demersal	John Dory	Zeus faber	2011-11-18	44
Fukushima	23.977	141.041	37.6402	Demersal	Fat greenling	Hexagrammos otakii	2011-11-18	110
Fukushima	23.977	141.041	37.6402	Demersal	Fat greenling	Hexagrammos otakii	2011-11-18	150
Fukushima	23.977	141.041	37.6402	Demersal	Seabass	Lateolabrax japonicus	2011-11-18	61
Fukushima	23.977	141.041	37.6402	Demersal	Monkfish	Lophiomus setigerus	2011-11-18	19
Fukushima	23.977	141.041	37.6402	Demersal	Olive flounder	Paralichthys olivaceus	2011-11-18	38
Fukushima	23.7828	141.025	37.2114	Demersal	Japanese black rockfish	Sebastes cheni	2011-11-19	310
Fukushima	23.7828	141.025	37.2114	Demersal	Goldeye rockfish	Sebastes thompsoni	2011-11-19	140
Fukushima	23.977	141.041	37.6402	Demersal	Seabass	Lateolabrax japonicus	2011-11-26	25
Fukushima	23.977	141.041	37.6402	Demersal	Olive flounder	Paralichthys olivaceus	2011-11-26	52
Fukushima	23.977	141.041	37.6402	Demersal	Slime flounder	Microstomus achne	2011-11-26	30
Fukushima	23.977	141.041	37.6402	Demersal	Marbled flounder	Pleuronectes yokohamae	2011-11-26	50
Fukushima	23.977	141.041	37.6402	Demersal	Littlemouth flounder	Pleuronectes herzensteini	2011-11-26	37
Fukushima	22.1679	140.809	37.3379	Demersal	Whitespotted char	Salvelinus leucomaenis	2011-11-29	14
Fukushima	23.7828	141.025	37.2114	Demersal	Stone flounder	Kareius bicoloratus	2011-12-02	99
Fukushima	23.977	141.041	37.6402	Demersal	Olive flounder	Paralichthys olivaceus	2011-12-02	61
Fukushima	23.977	141.041	37.6402	Demersal	Stone flounder	Kareius bicoloratus	2011-12-02	94
Fukushima	23.977	141.041	37.6402	Demersal	Slime flounder	Microstomus achne	2011-12-02	20
Fukushima	23.977	141.041	37.6402	Demersal	Marbled flounder	Pleuronectes yokohamae	2011-12-02	16
Fukushima	23.977	141.041	37.6402	Demersal	Littlemouth flounder	Pleuronectes herzensteini	2011-12-02	38
Fukushima	23.7828	141.025	37.2114	Demersal	Fat greenling	Hexagrammos otakii	2011-12-05	95
Fukushima	23.7828	141.025	37.2114	Demersal	Seabass	Lateolabrax japonicus	2011-12-05	82
Fukushima	23.7828	141.025	37.2114	Demersal	Olive flounder	Paralichthys olivaceus	2011-12-05	95
Fukushima	23.7828	141.025	37.2114	Demersal	Marbled flounder	Pleuronectes yokohamae	2011-12-05	200
Fukushima	23.7828	141.025	37.2114	Demersal	Littlemouth flounder	Pleuronectes herzensteini	2011-12-05	80
Fukushima	23.7828	141.025	37.2114	Demersal	Ocellate spot skate	Okamejei kenojei	2011-12-05	310
Fukushima	23.977	141.041	37.6402	Demersal	Stone flounder	Kareius bicoloratus	2011-12-07	140
Fukushima	23.977	141.041	37.6402	Demersal	Marbled flounder	Pleuronectes yokohamae	2011-12-07	36
Fukushima	6.43311	141.05	37.4814	Demersal	Slime flounder	Microstomus achne	2011-12-10	15
Fukushima	6.43311	141.05	37.4814	Demersal	Brown hakeling	Physiculus maximowiczi	2011-12-10	27
Fukushima	6.43311	141.05	37.4814	Demersal	Pacific cod	Gadus macrocephalus	2011-12-10	24
Fukushima	23.977	141.041	37.6402	Demersal	Seabass	Lateolabrax japonicus	2011-12-10	79
Fukushima	23.977	141.041	37.6402	Demersal	Olive flounder	Paralichthys olivaceus	2011-12-10	77
Fukushima	23.977	141.041	37.6402	Demersal	Olive flounder	Paralichthys olivaceus	2011-12-10	13
Fukushima	23.977	141.041	37.6402	Demersal	Stone flounder	Kareius bicoloratus	2011-12-10	130
Fukushima	23.977	141.041	37.6402	Demersal	Slime flounder	Microstomus achne	2011-12-10	33
Fukushima	23.7828	141.025	37.2114	Demersal	Fat greenling	Hexagrammos otakii	2011-12-12	1100
Fukushima	23.7828	141.025	37.2114	Demersal	Ocellate spot skate	Okamejei kenojei	2011-12-12	550
Fukushima	23.7828	141.025	37.2114	Demersal	Brassblotched rockfish	Sebastes pachycephalus	2011-12-12	490
Fukushima	23.7828	141.025	37.2114	Demersal	Japanese black rockfish	Sebastes cheni	2011-12-12	320
Fukushima	23.7828	141.025	37.2114	Demersal	Fox jacopever	Sebastes vulpes	2011-12-12	520
Fukushima	16.4957	141.032	37.2768	Demersal	Alaska pollock	Theragra chalcogramma	2011-12-15	57
Fukushima	10.3187	141.034	37.3322	Demersal	Pacific cod	Gadus macrocephalus	2011-12-15	30
Fukushima	23.977	141.041	37.6402	Demersal	Slime flounder	Microstomus achne	2011-12-15	52
Fukushima	23.977	141.041	37.6402	Demersal	Brown hakeling	Physiculus maximowiczi	2011-12-15	25
Fukushima	16.4957	141.032	37.2768	Demersal	Slime flounder	Microstomus achne	2011-12-15	150
Fukushima	16.4957	141.032	37.2768	Demersal	Brown hakeling	Physiculus maximowiczi	2011-12-15	24
Fukushima	16.4957	141.032	37.2768	Demersal	Brown hakeling	Physiculus maximowiczi	2011-12-15	48
Fukushima	23.977	141.041	37.6402	Demersal	Fat greenling	Hexagrammos otakii	2011-12-17	91
Fukushima	23.977	141.041	37.6402	Demersal	Olive flounder	Paralichthys olivaceus	2011-12-17	44
Fukushima	23.977	141.041	37.6402	Demersal	Slime flounder	Microstomus achne	2011-12-17	70
Fukushima	23.977	141.041	37.6402	Demersal	Marbled flounder	Pleuronectes yokohamae	2011-12-17	48
Fukushima	23.977	141.041	37.6402	Demersal	Japanese black rockfish	Sebastes cheni	2011-12-17	300
Fukushima	23.7828	141.025	37.2114	Demersal	Fat greenling	Hexagrammos otakii	2011-12-18	780
Fukushima	23.7828	141.025	37.2114	Demersal	Japanese black rockfish	Sebastes cheni	2011-12-18	1200
Fukushima	23.7828	141.025	37.2114	Demersal	Goldeye rockfish	Sebastes thompsoni	2011-12-18	940
Fukushima	23.7828	141.025	37.2114	Demersal	Ocellate spot skate	Okamejei kenojei	2011-12-19	260
Fukushima	23.7828	141.025	37.2114	Demersal	Fat greenling	Hexagrammos otakii	2011-12-19	550
Fukushima	23.7828	141.025	37.2114	Demersal	Seabass	Lateolabrax japonicus	2011-12-19	190
Fukushima	23.7828	141.025	37.2114	Demersal	Olive flounder	Paralichthys olivaceus	2011-12-19	23
Fukushima	23.7828	141.025	37.2114	Demersal	Olive flounder	Paralichthys olivaceus	2011-12-19	120
Fukushima	23.7828	141.025	37.2114	Demersal	Olive flounder	Paralichthys olivaceus	2011-12-19	140
Fukushima	23.7828	141.025	37.2114	Demersal	Slime flounder	Microstomus achne	2011-12-19	140
Fukushima	23.7828	141.025	37.2114	Demersal	Ocellate spot skate	Okamejei kenojei	2011-12-19	320
Fukushima	23.7828	141.025	37.2114	Demersal	Ocellate spot skate	Okamejei kenojei	2011-12-21	340
Fukushima	23.7828	141.025	37.2114	Demersal	Goldeye rockfish	Sebastes thompsoni	2011-12-21	120
Fukushima	23.7828	141.025	37.2114	Demersal	Congrid eel	Gnathophis nystromi nystromi	2011-12-21	74
Fukushima	23.977	141.041	37.6402	Demersal	Fat greenling	Hexagrammos otakii	2011-12-21	24
Fukushima	23.977	141.041	37.6402	Demersal	Seabass	Lateolabrax japonicus	2011-12-21	46
Fukushima	23.7828	141.025	37.2114	Demersal	Fat greenling	Hexagrammos otakii	2011-12-21	840
Fukushima	23.977	141.041	37.6402	Demersal	Olive flounder	Paralichthys olivaceus	2011-12-21	61
Fukushima	6.43311	141.05	37.4814	Demersal	Flathead flounder	Hippoglossoides dubius	2011-12-21	9.9
Fukushima	23.7828	141.025	37.2114	Demersal	Olive flounder	Paralichthys olivaceus	2011-12-21	22
Fukushima	2.58026	141.044	37.4028	Demersal	Pacific cod	Gadus macrocephalus	2011-12-21	36
Fukushima	2.58026	141.044	37.4028	Demersal	Flathead flounder	Hippoglossoides dubius	2011-12-21	37
Fukushima	23.7828	141.025	37.2114	Demersal	Starspotted smooth-hound	Mustelus manazo	2011-12-21	26
Fukushima	23.7828	141.025	37.2114	Demersal	Slime flounder	Microstomus achne	2011-12-21	130
Fukushima	23.7828	141.025	37.2114	Demersal	Marbled flounder	Pleuronectes yokohamae	2011-12-21	89
Fukushima	23.7828	141.025	37.2114	Demersal	Littlemouth flounder	Pleuronectes herzensteini	2011-12-21	67
Fukushima	23.7828	141.025	37.2114	Demersal	Redwing searobin	Lepidotrigla microptera	2011-12-21	31
Fukushima	23.977	141.041	37.6402	Demersal	Marbled flounder	Pleuronectes yokohamae	2012-01-13	160
Fukushima	23.977	141.041	37.6402	Demersal	Pacific cod	Gadus macrocephalus	2012-01-13	24
Fukushima	23.977	141.041	37.6402	Demersal	Japanese black rockfish	Sebastes cheni	2012-01-13	230
Fukushima	23.977	141.041	37.6402	Demersal	Olive flounder	Paralichthys olivaceus	2012-01-13	45
Fukushima	23.977	141.041	37.6402	Demersal	Olive flounder	Paralichthys olivaceus	2012-01-13	300
Fukushima	23.7828	141.025	37.2114	Demersal	Fat greenling	Hexagrammos otakii	2012-01-15	890
Fukushima	23.7828	141.025	37.2114	Demersal	Japanese black rockfish	Sebastes cheni	2012-01-15	1100
Fukushima	23.7828	141.025	37.2114	Demersal	Goldeye rockfish	Sebastes thompsoni	2012-01-15	840
Fukushima	23.7828	141.025	37.2114	Demersal	Fox jacopever	Sebastes vulpes	2012-01-15	740
Fukushima	23.7828	141.025	37.2114	Demersal	Ocellate spot skate	Okamejei kenojei	2012-01-16	330
Fukushima	23.7828	141.025	37.2114	Demersal	Fat greenling	Hexagrammos otakii	2012-01-16	350
Fukushima	23.7828	141.025	37.2114	Demersal	Olive flounder	Paralichthys olivaceus	2012-01-16	48
Fukushima	23.7828	141.025	37.2114	Demersal	Stone flounder	Kareius bicoloratus	2012-01-16	15
Fukushima	23.7828	141.025	37.2114	Demersal	Slime flounder	Microstomus achne	2012-01-16	240
Fukushima	23.7828	141.025	37.2114	Demersal	Marbled flounder	Pleuronectes yokohamae	2012-01-16	48
Fukushima	23.977	141.041	37.6402	Demersal	Olive flounder	Paralichthys olivaceus	2012-01-18	15
Fukushima	23.977	141.041	37.6402	Demersal	Brown hakeling	Physiculus maximowiczi	2012-01-18	8.5
Fukushima	23.977	141.041	37.6402	Demersal	Alaska pollock	Theragra chalcogramma	2012-01-18	41
Fukushima	23.977	141.041	37.6402	Demersal	Pacific cod	Gadus macrocephalus	2012-01-18	7.3
Fukushima	23.977	141.041	37.6402	Demersal	Flathead flounder	Hippoglossoides dubius	2012-01-18	8.3
Fukushima	23.977	141.041	37.6402	Demersal	Flathead flounder	Hippoglossoides dubius	2012-01-18	11
Fukushima	23.977	141.041	37.6402	Demersal	Seabass	Lateolabrax japonicus	2012-01-18	32
Fukushima	23.977	141.041	37.6402	Demersal	Monkfish	Lophiomus setigerus	2012-01-18	9.4
Fukushima	23.977	141.041	37.6402	Demersal	Slime flounder	Microstomus achne	2012-01-19	67
Fukushima	23.977	141.041	37.6402	Demersal	Marbled flounder	Pleuronectes yokohamae	2012-01-19	48
Fukushima	23.977	141.041	37.6402	Demersal	Redwing searobin	Lepidotrigla microptera	2012-01-19	11
Fukushima	23.977	141.041	37.6402	Demersal	Redwing searobin	Lepidotrigla microptera	2012-01-19	11
Fukushima	23.977	141.041	37.6402	Demersal	Ocellate spot skate	Okamejei kenojei	2012-01-19	49
Fukushima	23.977	141.041	37.6402	Demersal	Fat greenling	Hexagrammos otakii	2012-01-19	150
Fukushima	23.977	141.041	37.6402	Demersal	Olive flounder	Paralichthys olivaceus	2012-01-19	24
Fukushima	23.977	141.041	37.6402	Demersal	Elkhorn sculpin	Alcichthys elongatus	2012-01-19	12
Fukushima	23.977	141.041	37.6402	Demersal	Fat greenling	Hexagrammos otakii	2012-01-25	10
Fukushima	23.977	141.041	37.6402	Demersal	Seabass	Lateolabrax japonicus	2012-01-25	68
Fukushima	23.977	141.041	37.6402	Demersal	Olive flounder	Paralichthys olivaceus	2012-01-25	110
Fukushima	23.977	141.041	37.6402	Demersal	Conger eel	Conger myriaster	2012-01-25	20
Fukushima	23.977	141.041	37.6402	Demersal	Slime flounder	Microstomus achne	2012-01-25	27
Fukushima	23.977	141.041	37.6402	Demersal	Willowy flounder	Tanakius kitaharai	2012-01-25	40
Fukushima	23.977	141.041	37.6402	Demersal	Littlemouth flounder	Pleuronectes herzensteini	2012-01-25	13
Fukushima	23.977	141.041	37.6402	Demersal	Pacific cod	Gadus macrocephalus	2012-01-25	42
Fukushima	23.7828	141.025	37.2114	Demersal	Slime flounder	Microstomus achne	2012-01-26	570
Fukushima	23.7828	141.025	37.2114	Demersal	Marbled flounder	Pleuronectes yokohamae	2012-01-26	370
Fukushima	23.7828	141.025	37.2114	Demersal	Littlemouth flounder	Pleuronectes herzensteini	2012-01-26	50
Fukushima	23.7828	141.025	37.2114	Demersal	Pacific cod	Gadus macrocephalus	2012-01-26	48
Fukushima	23.7828	141.025	37.2114	Demersal	Ocellate spot skate	Okamejei kenojei	2012-01-26	200
Fukushima	23.7828	141.025	37.2114	Demersal	Ocellate spot skate	Okamejei kenojei	2012-01-26	480
Fukushima	23.7828	141.025	37.2114	Demersal	Japanese black rockfish	Sebastes cheni	2012-01-26	1800
Fukushima	23.7828	141.025	37.2114	Demersal	Panther puffer	Takifugu pardalis	2012-01-26	84
Fukushima	23.7828	141.025	37.2114	Demersal	Fat greenling	Hexagrammos otakii	2012-01-26	330
Fukushima	23.7828	141.025	37.2114	Demersal	Seabass	Lateolabrax japonicus	2012-01-26	1200
Fukushima	23.7828	141.025	37.2114	Demersal	Olive flounder	Paralichthys olivaceus	2012-01-26	560
Fukushima	23.977	141.041	37.6402	Demersal	Fat greenling	Hexagrammos otakii	2012-01-26	10
Fukushima	23.977	141.041	37.6402	Demersal	Olive flounder	Paralichthys olivaceus	2012-01-26	59
Fukushima	23.977	141.041	37.6402	Demersal	Sea raven	Hemitripterus villosus	2012-01-26	410
Fukushima	23.7828	141.025	37.2114	Demersal	Olive flounder	Paralichthys olivaceus	2012-01-26	300
Fukushima	23.977	141.041	37.6402	Demersal	Marbled flounder	Pleuronectes yokohamae	2012-01-26	59
Fukushima	23.977	141.041	37.6402	Demersal	Ocellate spot skate	Okamejei kenojei	2012-01-26	75
Fukushima	23.7828	141.025	37.2114	Demersal	Stone flounder	Kareius bicoloratus	2012-01-26	44
Fukushima	23.7828	141.025	37.2114	Demersal	Slime flounder	Microstomus achne	2012-01-26	210
Fukushima	23.977	141.041	37.6402	Demersal	Fat greenling	Hexagrammos otakii	2012-01-31	21
Fukushima	23.977	141.041	37.6402	Demersal	Sea raven	Hemitripterus villosus	2012-01-31	110
Fukushima	23.977	141.041	37.6402	Demersal	Redwing searobin	Lepidotrigla microptera	2012-01-31	24
Fukushima	23.977	141.041	37.6402	Demersal	Redwing searobin	Lepidotrigla microptera	2012-01-31	17
Fukushima	23.977	141.041	37.6402	Demersal	Flathead	Platycephalus sp.	2012-01-31	8.6
Fukushima	23.977	141.041	37.6402	Demersal	Japanese black rockfish	Sebastes cheni	2012-01-31	15
Fukushima	23.977	141.041	37.6402	Demersal	Fat greenling	Hexagrammos otakii	2012-01-31	420
Fukushima	23.977	141.041	37.6402	Demersal	Seabass	Lateolabrax japonicus	2012-01-31	49
Fukushima	23.977	141.041	37.6402	Demersal	Seabass	Lateolabrax japonicus	2012-01-31	42
Fukushima	23.977	141.041	37.6402	Demersal	Monkfish	Lophiomus setigerus	2012-01-31	23
Fukushima	23.977	141.041	37.6402	Demersal	Olive flounder	Paralichthys olivaceus	2012-01-31	41
Fukushima	23.977	141.041	37.6402	Demersal	Stone flounder	Kareius bicoloratus	2012-01-31	36
Fukushima	23.977	141.041	37.6402	Demersal	Slime flounder	Microstomus achne	2012-01-31	38
Fukushima	23.977	141.041	37.6402	Demersal	Sea raven	Hemitripterus villosus	2012-01-31	40
Fukushima	23.7828	141.025	37.2114	Demersal	Slime flounder	Microstomus achne	2012-02-06	850
Fukushima	23.7828	141.025	37.2114	Demersal	Marbled flounder	Pleuronectes yokohamae	2012-02-06	1500
Fukushima	23.7828	141.025	37.2114	Demersal	Pacific cod	Gadus macrocephalus	2012-02-06	78
Fukushima	23.7828	141.025	37.2114	Demersal	Ocellate spot skate	Okamejei kenojei	2012-02-06	390
Fukushima	23.7828	141.025	37.2114	Demersal	Korean rockfish	Sebastes schlegelii	2012-02-06	510
Fukushima	6.43311	141.05	37.4814	Demersal	Pacific cod	Gadus macrocephalus	2012-02-06	13
Fukushima	2.51452	141.046	37.4455	Demersal	Pacific cod	Gadus macrocephalus	2012-02-06	9.1
Fukushima	2.51452	141.046	37.4455	Demersal	Flathead flounder	Hippoglossoides dubius	2012-02-06	42
Fukushima	23.7828	141.025	37.2114	Demersal	Fat greenling	Hexagrammos otakii	2012-02-06	780
Fukushima	23.7828	141.025	37.2114	Demersal	Olive flounder	Paralichthys olivaceus	2012-02-06	281
Fukushima	23.7828	141.025	37.2114	Demersal	Ocellate spot skate	Okamejei kenojei	2012-02-09	610
Fukushima	23.7828	141.025	37.2114	Demersal	Fat greenling	Hexagrammos otakii	2012-02-09	24
Fukushima	23.7828	141.025	37.2114	Demersal	Olive flounder	Paralichthys olivaceus	2012-02-09	120
Fukushima	23.7828	141.025	37.2114	Demersal	Slime flounder	Microstomus achne	2012-02-09	520
Fukushima	23.7828	141.025	37.2114	Demersal	Marbled flounder	Pleuronectes yokohamae	2012-02-09	250
Fukushima	23.7828	141.025	37.2114	Demersal	Littlemouth flounder	Pleuronectes herzensteini	2012-02-09	52
Fukushima	23.7828	141.025	37.2114	Demersal	Pacific cod	Gadus macrocephalus	2012-02-09	71
Fukushima	23.977	141.041	37.6402	Demersal	Stone flounder	Kareius bicoloratus	2012-02-10	73
Fukushima	23.977	141.041	37.6402	Demersal	Slime flounder	Microstomus achne	2012-02-10	68
Fukushima	23.977	141.041	37.6402	Demersal	Slime flounder	Microstomus achne	2012-02-10	15
Fukushima	23.977	141.041	37.6402	Demersal	Brown hakeling	Physiculus maximowiczi	2012-02-10	88
Fukushima	23.977	141.041	37.6402	Demersal	Sea raven	Hemitripterus villosus	2012-02-10	37
Fukushima	23.977	141.041	37.6402	Demersal	Alaska pollock	Theragra chalcogramma	2012-02-10	12
Fukushima	23.977	141.041	37.6402	Demersal	Marbled flounder	Pleuronectes yokohamae	2012-02-10	55
Fukushima	23.977	141.041	37.6402	Demersal	Marbled flounder	Pleuronectes yokohamae	2012-02-10	12
Fukushima	23.977	141.041	37.6402	Demersal	Redwing searobin	Lepidotrigla microptera	2012-02-10	10
Fukushima	23.977	141.041	37.6402	Demersal	Pacific cod	Gadus macrocephalus	2012-02-10	53
Fukushima	23.977	141.041	37.6402	Demersal	Pacific cod	Gadus macrocephalus	2012-02-10	13
Fukushima	23.977	141.041	37.6402	Demersal	Shotted halibut	Eopsetta grigorjewi	2012-02-10	7.1
Fukushima	23.977	141.041	37.6402	Demersal	Ocellate spot skate	Okamejei kenojei	2012-02-10	97
Fukushima	23.977	141.041	37.6402	Demersal	Japanese black rockfish	Sebastes cheni	2012-02-10	260
Fukushima	23.977	141.041	37.6402	Demersal	Fat greenling	Hexagrammos otakii	2012-02-10	100
Fukushima	23.977	141.041	37.6402	Demersal	Fat greenling	Hexagrammos otakii	2012-02-10	590
Fukushima	23.977	141.041	37.6402	Demersal	Seabass	Lateolabrax japonicus	2012-02-10	20
Fukushima	23.977	141.041	37.6402	Demersal	Olive flounder	Paralichthys olivaceus	2012-02-10	14
Fukushima	23.977	141.041	37.6402	Demersal	Fat greenling	Hexagrammos otakii	2012-02-15	21
Fukushima	23.977	141.041	37.6402	Demersal	Slime flounder	Microstomus achne	2012-02-15	46
Fukushima	23.977	141.041	37.6402	Demersal	Willowy flounder	Tanakius kitaharai	2012-02-15	24
Fukushima	23.977	141.041	37.6402	Demersal	Spotted halibut	Verasper variegatus	2012-02-15	26
Fukushima	23.977	141.041	37.6402	Demersal	Sea raven	Hemitripterus villosus	2012-02-15	62
Fukushima	23.977	141.041	37.6402	Demersal	Marbled flounder	Pleuronectes yokohamae	2012-02-15	91
Fukushima	23.977	141.041	37.6402	Demersal	Marbled flounder	Pleuronectes yokohamae	2012-02-15	82
Fukushima	23.977	141.041	37.6402	Demersal	Littlemouth flounder	Pleuronectes herzensteini	2012-02-15	57
Fukushima	23.977	141.041	37.6402	Demersal	Littlemouth flounder	Pleuronectes herzensteini	2012-02-15	27
Fukushima	23.977	141.041	37.6402	Demersal	Redwing searobin	Lepidotrigla microptera	2012-02-15	29
Fukushima	23.977	141.041	37.6402	Demersal	Pacific cod	Gadus macrocephalus	2012-02-15	16
Fukushima	23.977	141.041	37.6402	Demersal	Fat greenling	Hexagrammos otakii	2012-02-15	84
Fukushima	23.977	141.041	37.6402	Demersal	Pacific cod	Gadus macrocephalus	2012-02-15	56
Fukushima	23.977	141.041	37.6402	Demersal	Flathead flounder	Hippoglossoides dubius	2012-02-15	8.8
Fukushima	23.977	141.041	37.6402	Demersal	Ocellate spot skate	Okamejei kenojei	2012-02-15	50
Fukushima	23.977	141.041	37.6402	Demersal	Flounder	Pleuronichthys japonicus	2012-02-15	16
Fukushima	23.977	141.041	37.6402	Demersal	Seabass	Lateolabrax japonicus	2012-02-15	29
Fukushima	23.977	141.041	37.6402	Demersal	Olive flounder	Paralichthys olivaceus	2012-02-15	61
Fukushima	23.977	141.041	37.6402	Demersal	Olive flounder	Paralichthys olivaceus	2012-02-15	110
Fukushima	23.977	141.041	37.6402	Demersal	Sohachi flounder	Cleisthenes pinetorum	2012-02-15	8.6
Fukushima	23.977	141.041	37.6402	Demersal	Rikuzen flounder	Dexistes rikuzenius	2012-02-15	16
Fukushima	23.977	141.041	37.6402	Demersal	Stone flounder	Kareius bicoloratus	2012-02-15	160
Fukushima	23.977	141.041	37.6402	Demersal	Slime flounder	Microstomus achne	2012-02-15	22
Fukushima	23.7828	141.025	37.2114	Demersal	Ridged-eye flounder	Pleuronichthys cornutus	2012-02-20	19
Fukushima	23.7828	141.025	37.2114	Demersal	Ridged-eye flounder	Pleuronichthys cornutus	2012-02-20	43
Fukushima	23.7828	141.025	37.2114	Demersal	Stone flounder	Kareius bicoloratus	2012-02-20	14
Fukushima	23.7828	141.025	37.2114	Demersal	Slime flounder	Microstomus achne	2012-02-20	670
Fukushima	23.7828	141.025	37.2114	Demersal	Slime flounder	Microstomus achne	2012-02-20	200
Fukushima	23.7828	141.025	37.2114	Demersal	Slime flounder	Microstomus achne	2012-02-20	170
Fukushima	23.7828	141.025	37.2114	Demersal	Spotted halibut	Verasper variegatus	2012-02-20	85
Fukushima	23.7828	141.025	37.2114	Demersal	Sea raven	Hemitripterus villosus	2012-02-20	100
Fukushima	23.7828	141.025	37.2114	Demersal	Marbled flounder	Pleuronectes yokohamae	2012-02-20	250
Fukushima	23.7828	141.025	37.2114	Demersal	Marbled flounder	Pleuronectes yokohamae	2012-02-20	160
Fukushima	23.7828	141.025	37.2114	Demersal	Littlemouth flounder	Pleuronectes herzensteini	2012-02-20	42
Fukushima	23.7828	141.025	37.2114	Demersal	Pacific cod	Gadus macrocephalus	2012-02-20	100
Fukushima	23.7828	141.025	37.2114	Demersal	Pacific cod	Gadus macrocephalus	2012-02-20	67
Fukushima	23.7828	141.025	37.2114	Demersal	Flathead flounder	Hippoglossoides dubius	2012-02-20	27
Fukushima	23.7828	141.025	37.2114	Demersal	Ocellate spot skate	Okamejei kenojei	2012-02-20	570
Fukushima	23.7828	141.025	37.2114	Demersal	Ocellate spot skate	Okamejei kenojei	2012-02-20	210
Fukushima	23.7828	141.025	37.2114	Demersal	Korean rockfish	Sebastes schlegelii	2012-02-20	770
Fukushima	23.7828	141.025	37.2114	Demersal	Korean rockfish	Sebastes schlegelii	2012-02-20	140
Fukushima	23.7828	141.025	37.2114	Demersal	Panther puffer	Takifugu pardalis	2012-02-20	19
Fukushima	23.7828	141.025	37.2114	Demersal	Fat greenling	Hexagrammos otakii	2012-02-20	690
Fukushima	10.3187	141.034	37.3322	Demersal	Pacific cod	Gadus macrocephalus	2012-02-20	24
Fukushima	23.7828	141.025	37.2114	Demersal	Fat greenling	Hexagrammos otakii	2012-02-20	490
Fukushima	23.7828	141.025	37.2114	Demersal	Fat greenling	Hexagrammos otakii	2012-02-20	660
Fukushima	23.7828	141.025	37.2114	Demersal	Seabass	Lateolabrax japonicus	2012-02-20	71
Fukushima	23.7828	141.025	37.2114	Demersal	Seabass	Lateolabrax japonicus	2012-02-20	86
Fukushima	23.7828	141.025	37.2114	Demersal	Olive flounder	Paralichthys olivaceus	2012-02-20	220
Fukushima	23.7828	141.025	37.2114	Demersal	Olive flounder	Paralichthys olivaceus	2012-02-20	23
Fukushima	23.977	141.041	37.6402	Demersal	Fat greenling	Hexagrammos otakii	2012-02-21	170
Fukushima	23.977	141.041	37.6402	Demersal	Olive flounder	Paralichthys olivaceus	2012-02-21	300
Fukushima	23.977	141.041	37.6402	Demersal	Stone flounder	Kareius bicoloratus	2012-02-21	230
Fukushima	23.977	141.041	37.6402	Demersal	Pacific cod	Gadus macrocephalus	2012-02-21	21
Fukushima	23.977	141.041	37.6402	Demersal	Ocellate spot skate	Okamejei kenojei	2012-02-21	130
Fukushima	23.7828	141.025	37.2114	Demersal	Pacific cod	Gadus macrocephalus	2012-02-22	150
Fukushima	23.7828	141.025	37.2114	Demersal	Goldeye rockfish	Sebastes thompsoni	2012-02-22	9.5
Fukushima	23.7828	141.025	37.2114	Demersal	Fox jacopever	Sebastes vulpes	2012-02-22	580
Fukushima	23.977	141.041	37.6402	Demersal	Fat greenling	Hexagrammos otakii	2012-02-29	14
Fukushima	23.977	141.041	37.6402	Demersal	Seabass	Lateolabrax japonicus	2012-02-29	51
Fukushima	23.977	141.041	37.6402	Demersal	Seabass	Lateolabrax japonicus	2012-02-29	16
Fukushima	23.977	141.041	37.6402	Demersal	Olive flounder	Paralichthys olivaceus	2012-02-29	110
Fukushima	23.977	141.041	37.6402	Demersal	Olive flounder	Paralichthys olivaceus	2012-02-29	130
Fukushima	23.977	141.041	37.6402	Demersal	Slime flounder	Microstomus achne	2012-02-29	7.7
Fukushima	23.977	141.041	37.6402	Demersal	Slime flounder	Microstomus achne	2012-02-29	22
Fukushima	23.977	141.041	37.6402	Demersal	Brown hakeling	Physiculus maximowiczi	2012-02-29	21
Fukushima	23.977	141.041	37.6402	Demersal	Brown hakeling	Physiculus maximowiczi	2012-02-29	36
Fukushima	23.977	141.041	37.6402	Demersal	Sea raven	Hemitripterus villosus	2012-02-29	60
Fukushima	23.977	141.041	37.6402	Demersal	Marbled flounder	Pleuronectes yokohamae	2012-02-29	26
Fukushima	23.977	141.041	37.6402	Demersal	Littlemouth flounder	Pleuronectes herzensteini	2012-02-29	24
Fukushima	23.977	141.041	37.6402	Demersal	Silver Croaker	Argyrosomus argentatus	2012-02-29	11
Fukushima	23.977	141.041	37.6402	Demersal	Pacific cod	Gadus macrocephalus	2012-02-29	92
Fukushima	2.58026	141.044	37.4028	Demersal	Brown hakeling	Physiculus maximowiczi	2012-02-29	14
Fukushima	2.58026	141.044	37.4028	Demersal	Alaska pollock	Theragra chalcogramma	2012-02-29	53
Fukushima	2.58026	141.044	37.4028	Demersal	Flathead flounder	Hippoglossoides dubius	2012-02-29	8.9
Fukushima	10.3187	141.034	37.3322	Demersal	Olive flounder	Paralichthys olivaceus	2012-02-29	21
Fukushima	10.3187	141.034	37.3322	Demersal	Brown hakeling	Physiculus maximowiczi	2012-02-29	13
Fukushima	10.3187	141.034	37.3322	Demersal	Pacific cod	Gadus macrocephalus	2012-02-29	13
Fukushima	23.977	141.041	37.6402	Demersal	Flathead	Platycephalus sp.	2012-03-02	35
Fukushima	23.977	141.041	37.6402	Demersal	Seabass	Lateolabrax japonicus	2012-03-02	390
Fukushima	23.977	141.041	37.6402	Demersal	Olive flounder	Paralichthys olivaceus	2012-03-02	61
Fukushima	23.977	141.041	37.6402	Demersal	Marbled flounder	Pleuronectes yokohamae	2012-03-02	140
Fukushima	23.977	141.041	37.6402	Demersal	Littlemouth flounder	Pleuronectes herzensteini	2012-03-02	42
Fukushima	23.977	141.041	37.6402	Demersal	Pacific cod	Gadus macrocephalus	2012-03-02	31
Fukushima	23.7828	141.025	37.2114	Demersal	Fat greenling	Hexagrammos otakii	2012-03-04	230
Fukushima	23.7828	141.025	37.2114	Demersal	Fat greenling	Hexagrammos otakii	2012-03-04	470
Fukushima	23.7828	141.025	37.2114	Demersal	Japanese black rockfish	Sebastes cheni	2012-03-04	280
Fukushima	23.7828	141.025	37.2114	Demersal	Goldeye rockfish	Sebastes thompsoni	2012-03-04	160
Fukushima	23.977	141.041	37.6402	Demersal	Pacific cod	Gadus macrocephalus	2012-03-08	38
Fukushima	23.977	141.041	37.6402	Demersal	Shotted halibut	Eopsetta grigorjewi	2012-03-08	16
Fukushima	6.43311	141.05	37.4814	Demersal	Pacific cod	Gadus macrocephalus	2012-03-08	19
Fukushima	23.977	141.041	37.6402	Demersal	Fat greenling	Hexagrammos otakii	2012-03-08	320
Fukushima	23.977	141.041	37.6402	Demersal	Seabass	Lateolabrax japonicus	2012-03-08	90
Fukushima	23.977	141.041	37.6402	Demersal	Olive flounder	Paralichthys olivaceus	2012-03-08	95
Fukushima	23.977	141.041	37.6402	Demersal	Conger eel	Conger myriaster	2012-03-08	100
Fukushima	23.977	141.041	37.6402	Demersal	Stone flounder	Kareius bicoloratus	2012-03-08	110
Fukushima	23.977	141.041	37.6402	Demersal	Slime flounder	Microstomus achne	2012-03-08	42
Fukushima	23.977	141.041	37.6402	Demersal	Marbled flounder	Pleuronectes yokohamae	2012-03-08	41
Fukushima	23.977	141.041	37.6402	Demersal	Pacific cod	Gadus macrocephalus	2012-03-08	28
Fukushima	23.7828	141.025	37.2114	Demersal	Fat greenling	Hexagrammos otakii	2012-03-14	120
Fukushima	23.7828	141.025	37.2114	Demersal	Japanese black rockfish	Sebastes cheni	2012-03-14	220
Fukushima	23.977	141.041	37.6402	Demersal	Fat greenling	Hexagrammos otakii	2012-03-14	28
Fukushima	23.977	141.041	37.6402	Demersal	Seabass	Lateolabrax japonicus	2012-03-14	34
Fukushima	23.977	141.041	37.6402	Demersal	Ridged-eye flounder	Pleuronichthys cornutus	2012-03-14	12
Fukushima	23.977	141.041	37.6402	Demersal	Stone flounder	Kareius bicoloratus	2012-03-14	150
Fukushima	23.977	141.041	37.6402	Demersal	Slime flounder	Microstomus achne	2012-03-14	43
Fukushima	23.977	141.041	37.6402	Demersal	Sea raven	Hemitripterus villosus	2012-03-14	25
Fukushima	23.977	141.041	37.6402	Demersal	Marbled flounder	Pleuronectes yokohamae	2012-03-14	39
Fukushima	23.977	141.041	37.6402	Demersal	Littlemouth flounder	Pleuronectes herzensteini	2012-03-14	34
Fukushima	23.977	141.041	37.6402	Demersal	Redwing searobin	Lepidotrigla microptera	2012-03-14	40
Fukushima	23.7828	141.025	37.2114	Demersal	Goldeye rockfish	Sebastes thompsoni	2012-03-14	330
Fukushima	23.977	141.041	37.6402	Demersal	Pacific cod	Gadus macrocephalus	2012-03-14	35
Fukushima	23.977	141.041	37.6402	Demersal	Pacific cod	Gadus macrocephalus	2012-03-14	53
Fukushima	23.7828	141.025	37.2114	Demersal	Fox jacopever	Sebastes vulpes	2012-03-14	140
Fukushima	23.7828	141.025	37.2114	Demersal	Slime flounder	Microstomus achne	2012-03-15	240
Fukushima	23.7828	141.025	37.2114	Demersal	Spotted halibut	Verasper variegatus	2012-03-15	31
Fukushima	23.7828	141.025	37.2114	Demersal	Sea raven	Hemitripterus villosus	2012-03-15	37
Fukushima	23.7828	141.025	37.2114	Demersal	Sea raven	Hemitripterus villosus	2012-03-15	23
Fukushima	23.7828	141.025	37.2114	Demersal	Marbled flounder	Pleuronectes yokohamae	2012-03-15	89
Fukushima	23.7828	141.025	37.2114	Demersal	Marbled flounder	Pleuronectes yokohamae	2012-03-15	81
Fukushima	23.7828	141.025	37.2114	Demersal	Littlemouth flounder	Pleuronectes herzensteini	2012-03-15	25
Fukushima	23.7828	141.025	37.2114	Demersal	Littlemouth flounder	Pleuronectes herzensteini	2012-03-15	30
Fukushima	23.7828	141.025	37.2114	Demersal	Pacific cod	Gadus macrocephalus	2012-03-15	110
Fukushima	23.7828	141.025	37.2114	Demersal	Ocellate spot skate	Okamejei kenojei	2012-03-15	300
Fukushima	23.7828	141.025	37.2114	Demersal	Fat greenling	Hexagrammos otakii	2012-03-15	660
Fukushima	23.7828	141.025	37.2114	Demersal	Ocellate spot skate	Okamejei kenojei	2012-03-15	190
Fukushima	23.977	141.041	37.6402	Demersal	Fat greenling	Hexagrammos otakii	2012-03-15	94
Fukushima	23.977	141.041	37.6402	Demersal	Olive flounder	Paralichthys olivaceus	2012-03-15	73
Fukushima	23.977	141.041	37.6402	Demersal	Marbled flounder	Pleuronectes yokohamae	2012-03-15	180
Fukushima	23.977	141.041	37.6402	Demersal	Littlemouth flounder	Pleuronectes herzensteini	2012-03-15	54
Fukushima	23.7828	141.025	37.2114	Demersal	Fat greenling	Hexagrammos otakii	2012-03-15	22
Fukushima	23.977	141.041	37.6402	Demersal	Pacific cod	Gadus macrocephalus	2012-03-15	53
Fukushima	23.977	141.041	37.6402	Demersal	Ocellate spot skate	Okamejei kenojei	2012-03-15	94
Fukushima	23.7828	141.025	37.2114	Demersal	Seabass	Lateolabrax japonicus	2012-03-15	34
Fukushima	23.7828	141.025	37.2114	Demersal	Monkfish	Lophiomus setigerus	2012-03-15	46
Fukushima	23.7828	141.025	37.2114	Demersal	Olive flounder	Paralichthys olivaceus	2012-03-15	42
Fukushima	23.7828	141.025	37.2114	Demersal	Olive flounder	Paralichthys olivaceus	2012-03-15	42
Fukushima	23.7828	141.025	37.2114	Demersal	Stone flounder	Kareius bicoloratus	2012-03-15	72
Fukushima	23.7828	141.025	37.2114	Demersal	Slime flounder	Microstomus achne	2012-03-15	570
Fukushima	25.3969	140.964	37.646	Demersal	Cherry salmon	Oncorhynchus masou	2012-03-18	1200
Fukushima	23.977	141.041	37.6402	Demersal	Pacific cod	Gadus macrocephalus	2012-03-22	53
Fukushima	23.977	141.041	37.6402	Demersal	Ishikawa icefish	Salangichthys ishikawae	2012-03-22	9.6
Fukushima	6.43311	141.05	37.4814	Demersal	Olive flounder	Paralichthys olivaceus	2012-03-22	8.7
Fukushima	6.43311	141.05	37.4814	Demersal	Pacific cod	Gadus macrocephalus	2012-03-22	14
Fukushima	23.7828	141.025	37.2114	Demersal	Pacific cod	Gadus macrocephalus	2012-03-22	35
Fukushima	23.977	141.041	37.6402	Demersal	Olive flounder	Paralichthys olivaceus	2012-03-22	25
Fukushima	23.977	141.041	37.6402	Demersal	Willowy flounder	Tanakius kitaharai	2012-03-22	12
Fukushima	23.977	141.041	37.6402	Demersal	Brown hakeling	Physiculus maximowiczi	2012-03-22	12
Fukushima	23.7828	141.025	37.2114	Demersal	Korean rockfish	Sebastes schlegelii	2012-03-25	25
Fukushima	23.7828	141.025	37.2114	Demersal	Ridged-eye flounder	Pleuronichthys cornutus	2012-03-26	53
Fukushima	23.7828	141.025	37.2114	Demersal	Marbled flounder	Pleuronectes yokohamae	2012-03-26	280
Fukushima	23.7828	141.025	37.2114	Demersal	Littlemouth flounder	Pleuronectes herzensteini	2012-03-26	26
Fukushima	23.7828	141.025	37.2114	Demersal	Shotted halibut	Eopsetta grigorjewi	2012-03-26	21
Fukushima	23.7828	141.025	37.2114	Demersal	Ocellate spot skate	Okamejei kenojei	2012-03-26	230
Fukushima	23.7828	141.025	37.2114	Demersal	Olive flounder	Paralichthys olivaceus	2012-03-26	71
Fukushima	23.7828	141.025	37.2114	Demersal	Ridged-eye flounder	Pleuronichthys cornutus	2012-03-26	53
Fukushima	23.7828	141.025	37.2114	Demersal	Marbled flounder	Pleuronectes yokohamae	2012-03-26	280
Fukushima	23.7828	141.025	37.2114	Demersal	Littlemouth flounder	Pleuronectes herzensteini	2012-03-26	26
Fukushima	23.7828	141.025	37.2114	Demersal	Shotted halibut	Eopsetta grigorjewi	2012-03-26	21
Fukushima	23.7828	141.025	37.2114	Demersal	Ocellate spot skate	Okamejei kenojei	2012-03-26	230
Fukushima	23.7828	141.025	37.2114	Demersal	Olive flounder	Paralichthys olivaceus	2012-03-26	71
Fukushima	15.1506	141.039	37.5609	Demersal	Olive flounder	Paralichthys olivaceus	2012-03-29	11
Fukushima	15.1506	141.039	37.5609	Demersal	Olive flounder	Paralichthys olivaceus	2012-03-29	11
Fukushima	15.1506	141.039	37.5609	Demersal	Brown hakeling	Physiculus maximowiczi	2012-03-29	26
Fukushima	15.1506	141.039	37.5609	Demersal	Brown hakeling	Physiculus maximowiczi	2012-03-29	26
Fukushima	15.1506	141.039	37.5609	Demersal	Redwing searobin	Lepidotrigla microptera	2012-03-29	27
Fukushima	15.1506	141.039	37.5609	Demersal	Redwing searobin	Lepidotrigla microptera	2012-03-29	27
Fukushima	15.1506	141.039	37.5609	Demersal	Pacific cod	Gadus macrocephalus	2012-03-29	38
Fukushima	15.1506	141.039	37.5609	Demersal	Pacific cod	Gadus macrocephalus	2012-03-29	38
Fukushima	17.807	141.039	37.265	Demersal	Ishikawa icefish	Salangichthys ishikawae	2012-03-29	12
Fukushima	17.807	141.039	37.265	Demersal	Japanese sandlance	Ammodytes personatus	2012-03-29	8
Fukushima	2.51452	141.046	37.4455	Demersal	Fat greenling	Hexagrammos otakii	2012-03-29	95
Fukushima	2.51452	141.046	37.4455	Demersal	Fat greenling	Hexagrammos otakii	2012-03-29	95
Fukushima	2.51452	141.046	37.4455	Demersal	Conger eel	Conger myriaster	2012-03-29	17
Fukushima	2.51452	141.046	37.4455	Demersal	Conger eel	Conger myriaster	2012-03-29	17
Fukushima	2.51452	141.046	37.4455	Demersal	Rikuzen flounder	Dexistes rikuzenius	2012-03-29	20
Fukushima	2.51452	141.046	37.4455	Demersal	Willowy flounder	Tanakius kitaharai	2012-03-29	14
Fukushima	2.51452	141.046	37.4455	Demersal	Rikuzen flounder	Dexistes rikuzenius	2012-03-29	20
Fukushima	2.51452	141.046	37.4455	Demersal	Willowy flounder	Tanakius kitaharai	2012-03-29	14
Fukushima	23.977	141.041	37.6402	Demersal	Olive flounder	Paralichthys olivaceus	2012-03-29	30
Fukushima	23.977	141.041	37.6402	Demersal	Olive flounder	Paralichthys olivaceus	2012-03-29	44
Fukushima	23.977	141.041	37.6402	Demersal	Olive flounder	Paralichthys olivaceus	2012-03-29	30
Fukushima	23.977	141.041	37.6402	Demersal	Olive flounder	Paralichthys olivaceus	2012-03-29	44
Fukushima	23.977	141.041	37.6402	Demersal	Stone flounder	Kareius bicoloratus	2012-03-29	82
Fukushima	23.977	141.041	37.6402	Demersal	Slime flounder	Microstomus achne	2012-03-29	23
Fukushima	23.977	141.041	37.6402	Demersal	Stone flounder	Kareius bicoloratus	2012-03-29	82
Fukushima	23.977	141.041	37.6402	Demersal	Slime flounder	Microstomus achne	2012-03-29	23
Fukushima	23.977	141.041	37.6402	Demersal	Marbled flounder	Pleuronectes yokohamae	2012-03-29	61
Fukushima	23.977	141.041	37.6402	Demersal	Marbled flounder	Pleuronectes yokohamae	2012-03-29	61
Fukushima	23.977	141.041	37.6402	Demersal	Littlemouth flounder	Pleuronectes herzensteini	2012-03-29	12
Fukushima	23.977	141.041	37.6402	Demersal	Littlemouth flounder	Pleuronectes herzensteini	2012-03-29	12
Fukushima	23.977	141.041	37.6402	Demersal	Pacific cod	Gadus macrocephalus	2012-03-29	94
Fukushima	23.977	141.041	37.6402	Demersal	Pacific cod	Gadus macrocephalus	2012-03-29	88
Fukushima	23.977	141.041	37.6402	Demersal	Pacific cod	Gadus macrocephalus	2012-03-29	94
Fukushima	23.977	141.041	37.6402	Demersal	Pacific cod	Gadus macrocephalus	2012-03-29	88
Fukushima	23.977	141.041	37.6402	Demersal	Ocellate spot skate	Okamejei kenojei	2012-03-29	110
Fukushima	23.977	141.041	37.6402	Demersal	Ocellate spot skate	Okamejei kenojei	2012-03-29	110
Fukushima	23.977	141.041	37.6402	Demersal	Flathead flounder	Hippoglossoides dubius	2012-03-30	35
Fukushima	23.977	141.041	37.6402	Demersal	Flathead flounder	Hippoglossoides dubius	2012-03-30	35
Fukushima	23.7828	141.025	37.2114	Demersal	Fat greenling	Hexagrammos otakii	2012-04-01	120
Fukushima	23.7828	141.025	37.2114	Demersal	Pacific cod	Gadus macrocephalus	2012-04-01	31
Fukushima	23.7828	141.025	37.2114	Demersal	Korean rockfish	Sebastes schlegelii	2012-04-01	43
Fukushima	23.977	141.041	37.6402	Demersal	Fat greenling	Hexagrammos otakii	2012-04-02	17
Fukushima	23.977	141.041	37.6402	Demersal	Olive flounder	Paralichthys olivaceus	2012-04-02	31
Fukushima	23.977	141.041	37.6402	Demersal	Slime flounder	Microstomus achne	2012-04-02	7.8
Fukushima	23.977	141.041	37.6402	Demersal	Willowy flounder	Tanakius kitaharai	2012-04-02	8.1
Fukushima	23.977	141.041	37.6402	Demersal	Sea raven	Hemitripterus villosus	2012-04-02	66
Fukushima	23.977	141.041	37.6402	Demersal	Littlemouth flounder	Pleuronectes herzensteini	2012-04-02	18
Fukushima	23.977	141.041	37.6402	Demersal	Flathead flounder	Hippoglossoides dubius	2012-04-02	11
Fukushima	23.7828	141.025	37.2114	Demersal	Japanese black rockfish	Sebastes cheni	2012-04-02	350
Fukushima	23.7828	141.025	37.2114	Demersal	Fat greenling	Hexagrammos otakii	2012-04-06	700
Fukushima	23.7828	141.025	37.2114	Demersal	Olive flounder	Paralichthys olivaceus	2012-04-06	56
Fukushima	23.7828	141.025	37.2114	Demersal	Sea raven	Hemitripterus villosus	2012-04-06	20
Fukushima	23.7828	141.025	37.2114	Demersal	Marbled flounder	Pleuronectes yokohamae	2012-04-06	140
Fukushima	23.7828	141.025	37.2114	Demersal	Littlemouth flounder	Pleuronectes herzensteini	2012-04-06	36
Fukushima	23.7828	141.025	37.2114	Demersal	Shotted halibut	Eopsetta grigorjewi	2012-04-06	20
Fukushima	23.7828	141.025	37.2114	Demersal	Ocellate spot skate	Okamejei kenojei	2012-04-06	240
Fukushima	23.7828	141.025	37.2114	Demersal	Flounder	Pleuronichthys japonicus	2012-04-06	17
Fukushima	16.4957	141.032	37.2768	Demersal	Fat greenling	Hexagrammos otakii	2012-04-06	28
Fukushima	16.4957	141.032	37.2768	Demersal	Olive flounder	Paralichthys olivaceus	2012-04-06	9
Fukushima	16.4957	141.032	37.2768	Demersal	Olive flounder	Paralichthys olivaceus	2012-04-06	59
Fukushima	16.4957	141.032	37.2768	Demersal	Slime flounder	Microstomus achne	2012-04-06	16
Fukushima	16.4957	141.032	37.2768	Demersal	Brown hakeling	Physiculus maximowiczi	2012-04-06	76
Fukushima	16.4957	141.032	37.2768	Demersal	Brown hakeling	Physiculus maximowiczi	2012-04-06	24
Fukushima	16.4957	141.032	37.2768	Demersal	Sea raven	Hemitripterus villosus	2012-04-06	27
Fukushima	16.4957	141.032	37.2768	Demersal	Pacific cod	Gadus macrocephalus	2012-04-06	43
Fukushima	16.4957	141.032	37.2768	Demersal	Fox jacopever	Sebastes vulpes	2012-04-06	22
Fukushima	17.807	141.039	37.265	Demersal	Common skate	Raja kenojei	2012-04-07	430
Fukushima	17.807	141.039	37.265	Demersal	Flounder	Pleuronichthys japonicus	2012-04-07	100
Fukushima	17.807	141.039	37.265	Demersal	Flounder	Pleuronichthys japonicus	2012-04-07	170
Fukushima	17.807	141.039	37.265	Demersal	Marbled sole	Pseudopleuronectes yokohamae	2012-04-07	280
Fukushima	17.807	141.039	37.265	Demersal	Pacific cod	Gadus macrocephalus	2012-04-07	9.6
Fukushima	17.807	141.039	37.265	Demersal	Pacific cod	Gadus macrocephalus	2012-04-07	28
Fukushima	17.807	141.039	37.265	Demersal	Roughscale sole	Clidoderma asperrimum	2012-04-07	10
Fukushima	17.807	141.039	37.265	Demersal	Seabass	Lateolabrax japonicus	2012-04-07	940
Fukushima	17.807	141.039	37.265	Demersal	Sea raven	Hemitripterus villosus	2012-04-07	170
Fukushima	17.807	141.039	37.265	Demersal	Spiny dogfish	Squalus acanthias	2012-04-07	5.3
Fukushima	17.807	141.039	37.265	Demersal	Brassblotched rockfish	Sebastes pachycephalus	2012-04-07	480
Fukushima	23.7828	141.025	37.2114	Demersal	Fat greenling	Hexagrammos otakii	2012-04-08	150
Fukushima	23.7828	141.025	37.2114	Demersal	Pacific cod	Gadus macrocephalus	2012-04-08	59
Fukushima	23.7828	141.025	37.2114	Demersal	Korean rockfish	Sebastes schlegelii	2012-04-08	93
Fukushima	23.7828	141.025	37.2114	Demersal	Fox jacopever	Sebastes vulpes	2012-04-08	240
Fukushima	23.7828	141.025	37.2114	Demersal	Fat greenling	Hexagrammos otakii	2012-04-09	9.9
Fukushima	23.7828	141.025	37.2114	Demersal	Seabass	Lateolabrax japonicus	2012-04-09	310
Fukushima	23.7828	141.025	37.2114	Demersal	Olive flounder	Paralichthys olivaceus	2012-04-09	77
Fukushima	23.7828	141.025	37.2114	Demersal	Conger eel	Conger myriaster	2012-04-09	220
Fukushima	23.7828	141.025	37.2114	Demersal	Marbled flounder	Pleuronectes yokohamae	2012-04-09	130
Fukushima	23.7828	141.025	37.2114	Demersal	Silver Croaker	Argyrosomus argentatus	2012-04-09	10
Fukushima	23.7828	141.025	37.2114	Demersal	Redwing searobin	Lepidotrigla microptera	2012-04-09	21
Fukushima	23.7828	141.025	37.2114	Demersal	Pacific cod	Gadus macrocephalus	2012-04-09	9.6
Fukushima	23.7828	141.025	37.2114	Demersal	Shotted halibut	Eopsetta grigorjewi	2012-04-09	16
Fukushima	23.7828	141.025	37.2114	Demersal	Flathead flounder	Hippoglossoides dubius	2012-04-09	16
Fukushima	23.977	141.041	37.6402	Demersal	Fat greenling	Hexagrammos otakii	2012-04-10	120
Fukushima	23.977	141.041	37.6402	Demersal	Olive flounder	Paralichthys olivaceus	2012-04-10	94
Fukushima	23.977	141.041	37.6402	Demersal	Stone flounder	Kareius bicoloratus	2012-04-10	100
Fukushima	23.977	141.041	37.6402	Demersal	Slime flounder	Microstomus achne	2012-04-10	95
Fukushima	23.977	141.041	37.6402	Demersal	Sea raven	Hemitripterus villosus	2012-04-10	290
Fukushima	23.977	141.041	37.6402	Demersal	Marbled flounder	Pleuronectes yokohamae	2012-04-10	65
Fukushima	23.977	141.041	37.6402	Demersal	Littlemouth flounder	Pleuronectes herzensteini	2012-04-10	29
Fukushima	23.977	141.041	37.6402	Demersal	Pacific cod	Gadus macrocephalus	2012-04-10	16
Fukushima	23.977	141.041	37.6402	Demersal	Ocellate spot skate	Okamejei kenojei	2012-04-10	78
Fukushima	23.977	141.041	37.6402	Demersal	Japanese black rockfish	Sebastes cheni	2012-04-10	160
Fukushima	2.58026	141.044	37.4028	Demersal	Brown hakeling	Physiculus maximowiczi	2012-04-10	260
Fukushima	17.807	141.039	37.265	Demersal	Common skate	Raja kenojei	2012-04-11	410
Fukushima	17.807	141.039	37.265	Demersal	Common skate	Raja kenojei	2012-04-11	450
Fukushima	17.807	141.039	37.265	Demersal	Flatfish		2012-04-11	130
Fukushima	17.807	141.039	37.265	Demersal	Marbled sole	Pseudopleuronectes yokohamae	2012-04-11	530
Fukushima	17.807	141.039	37.265	Demersal	Pacific cod	Gadus macrocephalus	2012-04-11	69
Fukushima	17.807	141.039	37.265	Demersal	Slime flounder	Microstomus achne	2012-04-11	420
Fukushima	17.807	141.039	37.265	Demersal	Slime flounder	Microstomus achne	2012-04-11	730
Fukushima	10.7249	141.154	37.4078	Demersal	Common skate	Raja kenojei	2012-04-13	180
Fukushima	10.7249	141.154	37.4078	Demersal	Flatfish		2012-04-13	530
Fukushima	10.7249	141.154	37.4078	Demersal	Marbled sole	Pseudopleuronectes yokohamae	2012-04-13	35
Fukushima	10.7249	141.154	37.4078	Demersal	Pacific cod	Gadus macrocephalus	2012-04-13	45
Fukushima	10.7249	141.154	37.4078	Demersal	Redwing searobin	Lepidotrigla microptera	2012-04-13	21
Fukushima	10.7249	141.154	37.4078	Demersal	Ridged-eye flounder	Pleuronichthys cornutus	2012-04-13	30
Fukushima	10.7249	141.154	37.4078	Demersal	Seabass	Lateolabrax japonicus	2012-04-13	100
Fukushima	10.7249	141.154	37.4078	Demersal	Stone flounder	Kareius bicoloratus	2012-04-13	18
Fukushima	23.7828	141.025	37.2114	Demersal	Japanese black rockfish	Sebastes cheni	2012-04-15	270
Fukushima	23.7828	141.025	37.2114	Demersal	Goldeye rockfish	Sebastes thompsoni	2012-04-15	340
Fukushima	23.7828	141.025	37.2114	Demersal	Fox jacopever	Sebastes vulpes	2012-04-15	7.8
Fukushima	23.977	141.041	37.6402	Demersal	Fat greenling	Hexagrammos otakii	2012-04-17	30.1
Fukushima	23.977	141.041	37.6402	Demersal	Japanese sandlance	Ammodytes personatus	2012-04-17	30
Fukushima	23.977	141.041	37.6402	Demersal	Stone flounder	Kareius bicoloratus	2012-04-17	184
Fukushima	23.977	141.041	37.6402	Demersal	Slime flounder	Microstomus achne	2012-04-17	31.1
Fukushima	23.977	141.041	37.6402	Demersal	Littlemouth flounder	Pleuronectes herzensteini	2012-04-17	18.5
Fukushima	15.1506	141.039	37.5609	Demersal	Rikuzen flounder	Dexistes rikuzenius	2012-04-17	10.1
Fukushima	15.1506	141.039	37.5609	Demersal	Willowy flounder	Tanakius kitaharai	2012-04-17	14.6
Fukushima	15.1506	141.039	37.5609	Demersal	Pacific cod	Gadus macrocephalus	2012-04-17	109
Fukushima	2.51452	141.046	37.4455	Demersal	Brown hakeling	Physiculus maximowiczi	2012-04-25	7.37
Fukushima	2.51452	141.046	37.4455	Demersal	Alaska pollock	Theragra chalcogramma	2012-04-25	65.1
Fukushima	2.51452	141.046	37.4455	Demersal	Pacific cod	Gadus macrocephalus	2012-04-25	16.9
Fukushima	23.977	141.041	37.6402	Demersal	Ishikawa icefish	Salangichthys ishikawae	2012-04-25	13.3
Fukushima	15.1506	141.039	37.5609	Demersal	Fat greenling	Hexagrammos otakii	2012-04-25	39
Fukushima	15.1506	141.039	37.5609	Demersal	Olive flounder	Paralichthys olivaceus	2012-04-25	60.8
Fukushima	15.1506	141.039	37.5609	Demersal	Willowy flounder	Tanakius kitaharai	2012-04-25	9.01
Fukushima	15.1506	141.039	37.5609	Demersal	Brown hakeling	Physiculus maximowiczi	2012-04-25	9.19
Fukushima	15.1506	141.039	37.5609	Demersal	Pacific cod	Gadus macrocephalus	2012-04-25	20
Fukushima	23.977	141.041	37.6402	Demersal	Slime flounder	Microstomus achne	2012-04-26	21.3
Fukushima	23.977	141.041	37.6402	Demersal	Starry flounder	Platichthys stellatus	2012-04-26	169
Fukushima	23.977	141.041	37.6402	Demersal	Sea raven	Hemitripterus villosus	2012-04-26	24.9
Fukushima	23.977	141.041	37.6402	Demersal	Marbled flounder	Pleuronectes yokohamae	2012-04-26	76.1
Fukushima	23.977	141.041	37.6402	Demersal	Pacific cod	Gadus macrocephalus	2012-04-26	24.5
Fukushima	23.977	141.041	37.6402	Demersal	Ocellate spot skate	Okamejei kenojei	2012-04-26	113
Fukushima	23.977	141.041	37.6402	Demersal	Japanese black rockfish	Sebastes cheni	2012-04-26	77.8
Fukushima	23.977	141.041	37.6402	Demersal	Fat greenling	Hexagrammos otakii	2012-04-26	75.7
Fukushima	23.977	141.041	37.6402	Demersal	Seabass	Lateolabrax japonicus	2012-04-26	76.5
Fukushima	23.977	141.041	37.6402	Demersal	Olive flounder	Paralichthys olivaceus	2012-04-26	103
Fukushima	23.977	141.041	37.6402	Demersal	Ridged-eye flounder	Pleuronichthys cornutus	2012-04-26	15.4
Fukushima	23.977	141.041	37.6402	Demersal	Stone flounder	Kareius bicoloratus	2012-04-26	97.3
Fukushima	17.807	141.039	37.265	Demersal	Common skate	Raja kenojei	2012-05-02	350
Fukushima	17.807	141.039	37.265	Demersal	Flatfish		2012-05-02	190
Fukushima	17.807	141.039	37.265	Demersal	Fat greenling	Hexagrammos otakii	2012-05-02	580
Fukushima	17.807	141.039	37.265	Demersal	Marbled sole	Pseudopleuronectes yokohamae	2012-05-02	120
Fukushima	17.807	141.039	37.265	Demersal	Redwing searobin	Lepidotrigla microptera	2012-05-02	27
Fukushima	17.807	141.039	37.265	Demersal	Japanese black rockfish	Sebastes cheni	2012-05-02	1100
Fukushima	17.807	141.039	37.265	Demersal	Sea raven	Hemitripterus villosus	2012-05-02	150
Fukushima	17.807	141.039	37.265	Demersal	Slime flounder	Microstomus achne	2012-05-02	680
Fukushima	23.7828	141.025	37.2114	Demersal	Japanese black rockfish	Sebastes cheni	2012-05-06	145
Fukushima	23.7828	141.025	37.2114	Demersal	Goldeye rockfish	Sebastes thompsoni	2012-05-06	90.2
Fukushima	23.7828	141.025	37.2114	Demersal	Fat greenling	Hexagrammos otakii	2012-05-07	439
Fukushima	23.7828	141.025	37.2114	Demersal	Fat greenling	Hexagrammos otakii	2012-05-07	82.6
Fukushima	23.7828	141.025	37.2114	Demersal	Olive flounder	Paralichthys olivaceus	2012-05-07	20.7
Fukushima	23.7828	141.025	37.2114	Demersal	Ridged-eye flounder	Pleuronichthys cornutus	2012-05-07	108
Fukushima	23.7828	141.025	37.2114	Demersal	Slime flounder	Microstomus achne	2012-05-07	18.2
Fukushima	23.7828	141.025	37.2114	Demersal	Slime flounder	Microstomus achne	2012-05-07	54.3
Fukushima	23.7828	141.025	37.2114	Demersal	Spotted halibut	Verasper variegatus	2012-05-07	330
Fukushima	23.7828	141.025	37.2114	Demersal	Sea raven	Hemitripterus villosus	2012-05-07	30.4
Fukushima	23.7828	141.025	37.2114	Demersal	Marbled flounder	Pleuronectes yokohamae	2012-05-07	67.8
Fukushima	23.7828	141.025	37.2114	Demersal	Marbled flounder	Pleuronectes yokohamae	2012-05-07	60.6
Fukushima	23.7828	141.025	37.2114	Demersal	Littlemouth flounder	Pleuronectes herzensteini	2012-05-07	13.8
Fukushima	23.7828	141.025	37.2114	Demersal	Littlemouth flounder	Pleuronectes herzensteini	2012-05-07	41.2
Fukushima	23.7828	141.025	37.2114	Demersal	Monkfish	Lophius litulon	2012-05-07	16.3
Fukushima	23.7828	141.025	37.2114	Demersal	Redwing searobin	Lepidotrigla microptera	2012-05-07	14.9
Fukushima	23.7828	141.025	37.2114	Demersal	Redwing searobin	Lepidotrigla microptera	2012-05-07	14.6
Fukushima	23.7828	141.025	37.2114	Demersal	Pacific cod	Gadus macrocephalus	2012-05-07	45.2
Fukushima	23.7828	141.025	37.2114	Demersal	Shotted halibut	Eopsetta grigorjewi	2012-05-07	66.3
Fukushima	23.7828	141.025	37.2114	Demersal	Ocellate spot skate	Okamejei kenojei	2012-05-07	219
Fukushima	23.7828	141.025	37.2114	Demersal	Ocellate spot skate	Okamejei kenojei	2012-05-07	195
Fukushima	14.4504	141.062	37.5528	Demersal	Japanese black rockfish	Sebastes cheni	2012-05-09	540
Fukushima	17.8103	141.042	37.5847	Demersal	Korean rockfish	Sebastes schlegelii	2012-05-09	320
Fukushima	17.8103	141.042	37.5847	Demersal	Sea raven	Hemitripterus villosus	2012-05-09	88
Fukushima	14.4504	141.062	37.5528	Demersal	Sea raven	Hemitripterus villosus	2012-05-09	190
Fukushima	17.8103	141.042	37.5847	Demersal	Silver croaker	Pennahia argentata	2012-05-09	11
Fukushima	14.4504	141.062	37.5528	Demersal	Silver croaker	Pennahia argentata	2012-05-09	25
Fukushima	14.4504	141.062	37.5528	Demersal	Slime flounder	Microstomus achne	2012-05-09	160
Fukushima	17.8103	141.042	37.5847	Demersal	Starry flounder	Platichthys stellatus	2012-05-09	470
Fukushima	14.4504	141.062	37.5528	Demersal	Stone flounder	Kareius bicoloratus	2012-05-09	220
Fukushima	17.8103	141.042	37.5847	Demersal	Common skate	Raja kenojei	2012-05-09	100
Fukushima	14.4504	141.062	37.5528	Demersal	Common skate	Raja kenojei	2012-05-09	110
Fukushima	17.8103	141.042	37.5847	Demersal	Flatfish		2012-05-09	94
Fukushima	14.4504	141.062	37.5528	Demersal	Flatfish		2012-05-09	700
Fukushima	14.4504	141.062	37.5528	Demersal	Fat greenling	Hexagrammos otakii	2012-05-09	130
Fukushima	17.8103	141.042	37.5847	Demersal	Fat greenling	Hexagrammos otakii	2012-05-09	160
Fukushima	17.8103	141.042	37.5847	Demersal	Marbled sole	Pseudopleuronectes yokohamae	2012-05-09	39
Fukushima	14.4504	141.062	37.5528	Demersal	Marbled sole	Pseudopleuronectes yokohamae	2012-05-09	100
Fukushima	16.4957	141.032	37.2768	Demersal	Rikuzen flounder	Dexistes rikuzenius	2012-05-10	9.08
Fukushima	16.4957	141.032	37.2768	Demersal	Japanese gissu	Pterothrissus gissu	2012-05-10	9.45
Fukushima	16.4957	141.032	37.2768	Demersal	Alaska pollock	Theragra chalcogramma	2012-05-10	32.8
Fukushima	16.4957	141.032	37.2768	Demersal	Alaska pollock	Theragra chalcogramma	2012-05-10	22.8
Fukushima	16.4957	141.032	37.2768	Demersal	Flathead flounder	Hippoglossoides dubius	2012-05-10	11.3
Fukushima	16.4957	141.032	37.2768	Demersal	Owston's rockfish	Sebastes owstoni	2012-05-10	8.62
Fukushima	10.7249	141.154	37.4078	Demersal	Conger eel	Conger myriaster	2012-05-10	39
Fukushima	10.7249	141.154	37.4078	Demersal	Common skate	Raja kenojei	2012-05-10	190
Fukushima	10.7249	141.154	37.4078	Demersal	Flatfish		2012-05-10	100
Fukushima	10.7249	141.154	37.4078	Demersal	Fat greenling	Hexagrammos otakii	2012-05-10	150
Fukushima	10.7249	141.154	37.4078	Demersal	Marbled sole	Pseudopleuronectes yokohamae	2012-05-10	51
Fukushima	10.7249	141.154	37.4078	Demersal	Pacific cod	Gadus macrocephalus	2012-05-10	31
Fukushima	10.7249	141.154	37.4078	Demersal	Redwing searobin	Lepidotrigla microptera	2012-05-10	19
Fukushima	10.7249	141.154	37.4078	Demersal	Shotted halibut	Eopsetta grigorjewi	2012-05-10	17
Fukushima	10.7249	141.154	37.4078	Demersal	Sea robin		2012-05-10	13
Fukushima	10.7249	141.154	37.4078	Demersal	Slime flounder	Microstomus achne	2012-05-10	38
Fukushima	23.7828	141.025	37.2114	Demersal	Fat greenling	Hexagrammos otakii	2012-05-13	128
Fukushima	23.7828	141.025	37.2114	Demersal	Japanese black rockfish	Sebastes cheni	2012-05-13	157
Fukushima	23.7828	141.025	37.2114	Demersal	Goldeye rockfish	Sebastes thompsoni	2012-05-13	156
Fukushima	23.7828	141.025	37.2114	Demersal	Fat greenling	Hexagrammos otakii	2012-05-14	69.1
Fukushima	23.7828	141.025	37.2114	Demersal	Olive flounder	Paralichthys olivaceus	2012-05-14	25.2
Fukushima	23.7828	141.025	37.2114	Demersal	Slime flounder	Microstomus achne	2012-05-14	51
Fukushima	23.7828	141.025	37.2114	Demersal	Marbled flounder	Pleuronectes yokohamae	2012-05-14	137
Fukushima	23.7828	141.025	37.2114	Demersal	Littlemouth flounder	Pleuronectes herzensteini	2012-05-14	23.5
Fukushima	23.7828	141.025	37.2114	Demersal	Monkfish	Lophius litulon	2012-05-14	12.1
Fukushima	23.7828	141.025	37.2114	Demersal	Redwing searobin	Lepidotrigla microptera	2012-05-14	25.8
Fukushima	23.7828	141.025	37.2114	Demersal	Shotted halibut	Eopsetta grigorjewi	2012-05-14	12.1
Fukushima	23.7828	141.025	37.2114	Demersal	Ocellate spot skate	Okamejei kenojei	2012-05-14	184
Fukushima	20.3127	141.233	37.5167	Demersal	Conger eel	Conger myriaster	2012-05-17	14
Fukushima	20.1102	141.217	37.5333	Demersal	Flatfish		2012-05-17	5.6
Fukushima	20.3127	141.233	37.5167	Demersal	Flatfish		2012-05-17	35
Fukushima	20.3127	141.233	37.5167	Demersal	Flathead flounder	Hippoglossoides dubius	2012-05-17	4.1
Fukushima	20.3127	141.233	37.5167	Demersal	Fat greenling	Hexagrammos otakii	2012-05-17	38
Fukushima	20.1102	141.217	37.5333	Demersal	Fat greenling	Hexagrammos otakii	2012-05-17	50
Fukushima	20.3127	141.233	37.5167	Demersal	Olive flounder	Paralichthys olivaceus	2012-05-17	4.8
Fukushima	20.3127	141.233	37.5167	Demersal	Littlemouth flounder	Pseudopleuronectes herzensteini	2012-05-17	25
Fukushima	20.1102	141.217	37.5333	Demersal	Littlemouth flounder	Pseudopleuronectes herzensteini	2012-05-17	32
Fukushima	20.3127	141.233	37.5167	Demersal	Long shanny	Stichaeus grigorjewi	2012-05-17	9.2
Fukushima	20.1102	141.217	37.5333	Demersal	Long shanny	Stichaeus grigorjewi	2012-05-17	27
Fukushima	20.3127	141.233	37.5167	Demersal	Marbled sole	Pseudopleuronectes yokohamae	2012-05-17	28
Fukushima	20.1102	141.217	37.5333	Demersal	Marbled sole	Pseudopleuronectes yokohamae	2012-05-17	53
Fukushima	20.3127	141.233	37.5167	Demersal	Pacific cod	Gadus macrocephalus	2012-05-17	15
Fukushima	20.1102	141.217	37.5333	Demersal	Pacific cod	Gadus macrocephalus	2012-05-17	50
Fukushima	20.3127	141.233	37.5167	Demersal	Pointhead flounder	Cleisthenes herzensteini	2012-05-17	4.1
Fukushima	20.1102	141.217	37.5333	Demersal	Redwing searobin	Lepidotrigla microptera	2012-05-17	6.4
Fukushima	20.3127	141.233	37.5167	Demersal	Redwing searobin	Lepidotrigla microptera	2012-05-17	8.6
Fukushima	20.1102	141.217	37.5333	Demersal	Shotted halibut	Eopsetta grigorjewi	2012-05-17	4.5
Fukushima	20.3127	141.233	37.5167	Demersal	Shotted halibut	Eopsetta grigorjewi	2012-05-17	9.6
Fukushima	20.1102	141.217	37.5333	Demersal	Seabass	Lateolabrax japonicus	2012-05-17	22
Fukushima	20.3127	141.233	37.5167	Demersal	Sea raven	Hemitripterus villosus	2012-05-17	15
Fukushima	20.3127	141.233	37.5167	Demersal	Slime flounder	Microstomus achne	2012-05-17	17
Fukushima	20.1102	141.217	37.5333	Demersal	Slime flounder	Microstomus achne	2012-05-17	27
Fukushima	20.3127	141.233	37.5167	Demersal	Slippery sole	Microstomus Pacificus	2012-05-17	18
Fukushima	20.1102	141.217	37.5333	Demersal	Stone flounder	Kareius bicoloratus	2012-05-17	120
Fukushima	20.3127	141.233	37.5167	Demersal	Monkfish	Lophius litulon	2012-05-17	4.3
Fukushima	20.1102	141.217	37.5333	Demersal	Monkfish	Lophius litulon	2012-05-17	4.5
Fukushima	23.977	141.041	37.6402	Demersal	Olive flounder	Paralichthys olivaceus	2012-05-17	114
Fukushima	23.977	141.041	37.6402	Demersal	Slime flounder	Microstomus achne	2012-05-17	114
Fukushima	23.977	141.041	37.6402	Demersal	Barfin flounder	Verasper moseri	2012-05-17	42.2
Fukushima	23.977	141.041	37.6402	Demersal	Sea raven	Hemitripterus villosus	2012-05-17	149
Fukushima	23.977	141.041	37.6402	Demersal	Marbled flounder	Pleuronectes yokohamae	2012-05-17	93.6
Fukushima	15.1506	141.039	37.5609	Demersal	Olive flounder	Paralichthys olivaceus	2012-05-17	50.3
Fukushima	15.1506	141.039	37.5609	Demersal	Willowy flounder	Tanakius kitaharai	2012-05-17	13.6
Fukushima	15.1506	141.039	37.5609	Demersal	Sea raven	Hemitripterus villosus	2012-05-17	17.6
Fukushima	15.1506	141.039	37.5609	Demersal	Alaska pollock	Theragra chalcogramma	2012-05-17	30.4
Fukushima	15.1506	141.039	37.5609	Demersal	Littlemouth flounder	Pleuronectes herzensteini	2012-05-17	10.6
Fukushima	15.1506	141.039	37.5609	Demersal	Monkfish	Lophius litulon	2012-05-17	12.8
Fukushima	15.1506	141.039	37.5609	Demersal	Pacific cod	Gadus macrocephalus	2012-05-17	80.4
Fukushima	13.1877	141.149	37.3483	Demersal	Common skate	Raja kenojei	2012-05-21	190
Fukushima	13.1877	141.149	37.3483	Demersal	Fat greenling	Hexagrammos otakii	2012-05-21	65
Fukushima	13.1877	141.149	37.3483	Demersal	Littlemouth flounder	Pseudopleuronectes herzensteini	2012-05-21	43
Fukushima	13.1877	141.149	37.3483	Demersal	Marbled sole	Pseudopleuronectes yokohamae	2012-05-21	62
Fukushima	13.1877	141.149	37.3483	Demersal	Pacific cod	Gadus macrocephalus	2012-05-21	30
Fukushima	13.1877	141.149	37.3483	Demersal	Redwing searobin	Lepidotrigla microptera	2012-05-21	14
Fukushima	13.1877	141.149	37.3483	Demersal	Shotted halibut	Eopsetta grigorjewi	2012-05-21	32
Fukushima	13.1877	141.149	37.3483	Demersal	Seabass	Lateolabrax japonicus	2012-05-21	32
Fukushima	13.1877	141.149	37.3483	Demersal	Slime flounder	Microstomus achne	2012-05-21	47
Fukushima	13.1877	141.149	37.3483	Demersal	Monkfish	Lophius litulon	2012-05-21	17
Fukushima	23.977	141.041	37.6402	Demersal	Olive flounder	Paralichthys olivaceus	2012-05-21	40.8
Fukushima	23.977	141.041	37.6402	Demersal	Willowy flounder	Tanakius kitaharai	2012-05-21	11
Fukushima	23.977	141.041	37.6402	Demersal	Brown hakeling	Physiculus maximowiczi	2012-05-21	20.2
Fukushima	23.977	141.041	37.6402	Demersal	Sea raven	Hemitripterus villosus	2012-05-21	19.6
Fukushima	23.977	141.041	37.6402	Demersal	Littlemouth flounder	Pleuronectes herzensteini	2012-05-21	7.24
Fukushima	23.977	141.041	37.6402	Demersal	Monkfish	Lophius litulon	2012-05-21	9.05
Fukushima	23.977	141.041	37.6402	Demersal	Fat greenling	Hexagrammos otakii	2012-05-24	177
Fukushima	23.977	141.041	37.6402	Demersal	Japanese sandlance	Ammodytes personatus	2012-05-24	36.9
Fukushima	23.977	141.041	37.6402	Demersal	Olive flounder	Paralichthys olivaceus	2012-05-24	122
Fukushima	23.977	141.041	37.6402	Demersal	Littlemouth flounder	Pleuronectes herzensteini	2012-05-24	10.5
Fukushima	23.977	141.041	37.6402	Demersal	Pacific cod	Gadus macrocephalus	2012-05-24	54
Fukushima	23.977	141.041	37.6402	Demersal	Ocellate spot skate	Okamejei kenojei	2012-05-24	79.6
Fukushima	23.977	141.041	37.6402	Demersal	Japanese black rockfish	Sebastes cheni	2012-05-24	55.2
Fukushima	23.977	141.041	37.6402	Demersal	Goldeye rockfish	Sebastes thompsoni	2012-05-24	40.4
Fukushima	5.39219	141.079	37.4583	Demersal	Barfin flounder	Verasper moseri	2012-05-25	410
Fukushima	5.39219	141.079	37.4583	Demersal	Common skate	Raja kenojei	2012-05-25	320
Fukushima	4.23837	141.083	37.4286	Demersal	Common skate	Raja kenojei	2012-05-25	480
Fukushima	4.23837	141.083	37.4286	Demersal	Flatfish		2012-05-25	86
Fukushima	5.39219	141.079	37.4583	Demersal	Flatfish		2012-05-25	100
Fukushima	4.23837	141.083	37.4286	Demersal	Fat greenling	Hexagrammos otakii	2012-05-25	280
Fukushima	5.39219	141.079	37.4583	Demersal	Fat greenling	Hexagrammos otakii	2012-05-25	550
Fukushima	4.23837	141.083	37.4286	Demersal	Marbled sole	Pseudopleuronectes yokohamae	2012-05-25	130
Fukushima	5.39219	141.079	37.4583	Demersal	Marbled sole	Pseudopleuronectes yokohamae	2012-05-25	150
Fukushima	5.39219	141.079	37.4583	Demersal	Pitted stingray	Dasyatis matsubarai	2012-05-25	120
Fukushima	4.23837	141.083	37.4286	Demersal	Japanese black rockfish	Sebastes cheni	2012-05-25	970
Fukushima	5.39219	141.079	37.4583	Demersal	Korean rockfish	Sebastes schlegelii	2012-05-25	240
Fukushima	4.23837	141.083	37.4286	Demersal	Seabass	Lateolabrax japonicus	2012-05-25	33
Fukushima	4.23837	141.083	37.4286	Demersal	Sea raven	Hemitripterus villosus	2012-05-25	400
Fukushima	4.23837	141.083	37.4286	Demersal	Sea robin		2012-05-25	42
Fukushima	4.23837	141.083	37.4286	Demersal	Silver croaker	Pennahia argentata	2012-05-25	39
Fukushima	5.39219	141.079	37.4583	Demersal	Silver croaker	Pennahia argentata	2012-05-25	68
Fukushima	5.39219	141.079	37.4583	Demersal	Slime flounder	Microstomus achne	2012-05-25	240
Fukushima	4.23837	141.083	37.4286	Demersal	Slime flounder	Microstomus achne	2012-05-25	330
Fukushima	4.23837	141.083	37.4286	Demersal	Monkfish	Lophius litulon	2012-05-25	11
Fukushima	23.7828	141.025	37.2114	Demersal	Fat greenling	Hexagrammos otakii	2012-05-27	514
Fukushima	23.7828	141.025	37.2114	Demersal	Japanese black rockfish	Sebastes cheni	2012-05-27	429
Fukushima	23.7828	141.025	37.2114	Demersal	Goldeye rockfish	Sebastes thompsoni	2012-05-27	920
Fukushima	20.3127	141.233	37.5167	Demersal	Common horse mackerel		2012-05-30	9
Fukushima	20.1102	141.217	37.5333	Demersal	Common horse mackerel		2012-05-30	18
Fukushima	20.1102	141.217	37.5333	Demersal	Common skate	Raja kenojei	2012-05-30	110
Fukushima	12.7154	141.047	37.3111	Demersal	Common skate	Raja kenojei	2012-05-30	310
Fukushima	20.1102	141.217	37.5333	Demersal	Dory	Zenopsis nebulosa	2012-05-30	7.2
Fukushima	20.1102	141.217	37.5333	Demersal	Flatfish		2012-05-30	26
Fukushima	12.7154	141.047	37.3111	Demersal	Flatfish		2012-05-30	170
Fukushima	20.3127	141.233	37.5167	Demersal	Fat greenling	Hexagrammos otakii	2012-05-30	43
Fukushima	20.1102	141.217	37.5333	Demersal	Fat greenling	Hexagrammos otakii	2012-05-30	48
Fukushima	20.1102	141.217	37.5333	Demersal	Littlemouth flounder	Pseudopleuronectes herzensteini	2012-05-30	64
Fukushima	20.3127	141.233	37.5167	Demersal	Long shanny	Stichaeus grigorjewi	2012-05-30	28
Fukushima	20.3127	141.233	37.5167	Demersal	Marbled sole	Pseudopleuronectes yokohamae	2012-05-30	16
Fukushima	20.1102	141.217	37.5333	Demersal	Marbled sole	Pseudopleuronectes yokohamae	2012-05-30	28
Fukushima	12.7154	141.047	37.3111	Demersal	Marbled sole	Pseudopleuronectes yokohamae	2012-05-30	300
Fukushima	20.3127	141.233	37.5167	Demersal	Pacific cod	Gadus macrocephalus	2012-05-30	45
Fukushima	20.1102	141.217	37.5333	Demersal	Pacific cod	Gadus macrocephalus	2012-05-30	60
Fukushima	20.3127	141.233	37.5167	Demersal	Pointhead flounder	Cleisthenes herzensteini	2012-05-30	8.3
Fukushima	20.1102	141.217	37.5333	Demersal	Redwing searobin	Lepidotrigla microptera	2012-05-30	11
Fukushima	20.3127	141.233	37.5167	Demersal	Redwing searobin	Lepidotrigla microptera	2012-05-30	15
Fukushima	12.7154	141.047	37.3111	Demersal	Seabass	Lateolabrax japonicus	2012-05-30	210
Fukushima	20.1102	141.217	37.5333	Demersal	Silver croaker	Pennahia argentata	2012-05-30	8
Fukushima	12.7154	141.047	37.3111	Demersal	Silver croaker	Pennahia argentata	2012-05-30	74
Fukushima	20.1102	141.217	37.5333	Demersal	Slime flounder	Microstomus achne	2012-05-30	13
Fukushima	20.3127	141.233	37.5167	Demersal	Slime flounder	Microstomus achne	2012-05-30	19
Fukushima	12.7154	141.047	37.3111	Demersal	Slime flounder	Microstomus achne	2012-05-30	290
Fukushima	20.3127	141.233	37.5167	Demersal	Slippery sole	Microstomus Pacificus	2012-05-30	15
Fukushima	12.7154	141.047	37.3111	Demersal	Pitted stingray	Dasyatis matsubarai	2012-05-30	33
Fukushima	20.1102	141.217	37.5333	Demersal	Stone flounder	Kareius bicoloratus	2012-05-30	140
Fukushima	20.1102	141.217	37.5333	Demersal	Monkfish	Lophius litulon	2012-05-30	7.2
Fukushima	12.7154	141.047	37.3111	Demersal	Monkfish	Lophius litulon	2012-05-30	5.6
Fukushima	20.3127	141.233	37.5167	Demersal	Monkfish	Lophius litulon	2012-05-30	6.4
Fukushima	12.7154	141.047	37.3111	Demersal	Banded dogfish	Chiloscyllium griseum	2012-05-30	300
Fukushima	23.977	141.041	37.6402	Demersal	Fat greenling	Hexagrammos otakii	2012-05-31	59.7
Fukushima	23.977	141.041	37.6402	Demersal	Olive flounder	Paralichthys olivaceus	2012-05-31	44.5
Fukushima	23.977	141.041	37.6402	Demersal	Stone flounder	Kareius bicoloratus	2012-05-31	28.8
Fukushima	23.977	141.041	37.6402	Demersal	Slime flounder	Microstomus achne	2012-05-31	52.4
Fukushima	23.977	141.041	37.6402	Demersal	Spotted halibut	Verasper variegatus	2012-05-31	27.6
Fukushima	23.977	141.041	37.6402	Demersal	Brown hakeling	Physiculus maximowiczi	2012-05-31	64.6
Fukushima	23.977	141.041	37.6402	Demersal	Marbled flounder	Pleuronectes yokohamae	2012-05-31	38.3
Fukushima	23.977	141.041	37.6402	Demersal	Littlemouth flounder	Pleuronectes herzensteini	2012-05-31	37.1
Fukushima	23.977	141.041	37.6402	Demersal	Silver Croaker	Argyrosomus argentatus	2012-05-31	32.7
Fukushima	23.977	141.041	37.6402	Demersal	Redwing searobin	Lepidotrigla microptera	2012-05-31	28.9
Fukushima	23.977	141.041	37.6402	Demersal	Red seabream	Pagrus major	2012-05-31	29
Fukushima	23.977	141.041	37.6402	Demersal	Ocellate spot skate	Okamejei kenojei	2012-05-31	66.1
Fukushima	23.977	141.041	37.6402	Demersal	John Dory	Zeus faber	2012-05-31	13.6
Fukushima	23.977	141.041	37.6402	Demersal	Japanese black rockfish	Sebastes cheni	2012-05-31	134
Fukushima	23.7828	141.025	37.2114	Demersal	Japanese black rockfish	Sebastes cheni	2012-06-03	604
Fukushima	23.7828	141.025	37.2114	Demersal	Goldeye rockfish	Sebastes thompsoni	2012-06-03	162
Fukushima	23.7828	141.025	37.2114	Demersal	Fox jacopever	Sebastes vulpes	2012-06-03	358
Fukushima	10.7249	141.154	37.4078	Demersal	Common skate	Raja kenojei	2012-06-04	110
Fukushima	10.7249	141.154	37.4078	Demersal	Flatfish		2012-06-04	74
Fukushima	10.7249	141.154	37.4078	Demersal	Fat greenling	Hexagrammos otakii	2012-06-04	180
Fukushima	10.7249	141.154	37.4078	Demersal	Marbled sole	Pseudopleuronectes yokohamae	2012-06-04	41
Fukushima	10.7249	141.154	37.4078	Demersal	Pitted stingray	Dasyatis matsubarai	2012-06-04	53
Fukushima	10.7249	141.154	37.4078	Demersal	Red seabream	Pagrus major	2012-06-04	9.2
Fukushima	10.7249	141.154	37.4078	Demersal	Redwing searobin	Lepidotrigla microptera	2012-06-04	13
Fukushima	10.7249	141.154	37.4078	Demersal	Shotted halibut	Eopsetta grigorjewi	2012-06-04	24
Fukushima	10.7249	141.154	37.4078	Demersal	Slime flounder	Microstomus achne	2012-06-04	47
Fukushima	10.7249	141.154	37.4078	Demersal	Stone flounder	Kareius bicoloratus	2012-06-04	43
Fukushima	10.7249	141.154	37.4078	Demersal	Monkfish	Lophius litulon	2012-06-04	7.8
Fukushima	23.977	141.041	37.6402	Demersal	Fat greenling	Hexagrammos otakii	2012-06-06	55.4
Fukushima	23.977	141.041	37.6402	Demersal	Olive flounder	Paralichthys olivaceus	2012-06-06	10.4
Fukushima	23.977	141.041	37.6402	Demersal	Ridged-eye flounder	Pleuronichthys cornutus	2012-06-06	9.78
Fukushima	23.977	141.041	37.6402	Demersal	Conger eel	Conger myriaster	2012-06-06	20.7
Fukushima	23.977	141.041	37.6402	Demersal	Sohachi flounder	Cleisthenes pinetorum	2012-06-06	26.2
Fukushima	23.977	141.041	37.6402	Demersal	Stone flounder	Kareius bicoloratus	2012-06-06	87.3
Fukushima	23.977	141.041	37.6402	Demersal	Sea raven	Hemitripterus villosus	2012-06-06	19.6
Fukushima	23.977	141.041	37.6402	Demersal	Littlemouth flounder	Pleuronectes herzensteini	2012-06-06	10.1
Fukushima	23.977	141.041	37.6402	Demersal	Silver Croaker	Argyrosomus argentatus	2012-06-06	14.8
Fukushima	23.977	141.041	37.6402	Demersal	Ocellate spot skate	Okamejei kenojei	2012-06-06	41.2
Fukushima	23.7828	141.025	37.2114	Demersal	Fat greenling	Hexagrammos otakii	2012-06-06	34.6
Fukushima	23.7828	141.025	37.2114	Demersal	Olive flounder	Paralichthys olivaceus	2012-06-06	7.48
Fukushima	23.7828	141.025	37.2114	Demersal	Slime flounder	Microstomus achne	2012-06-06	91.2
Fukushima	23.7828	141.025	37.2114	Demersal	Marbled flounder	Pleuronectes yokohamae	2012-06-06	153
Fukushima	23.7828	141.025	37.2114	Demersal	Redwing searobin	Lepidotrigla microptera	2012-06-06	21.3
Fukushima	23.7828	141.025	37.2114	Demersal	Shotted halibut	Eopsetta grigorjewi	2012-06-06	63.2
Fukushima	23.7828	141.025	37.2114	Demersal	Ocellate spot skate	Okamejei kenojei	2012-06-06	136
Fukushima	17.8103	141.042	37.5847	Demersal	Banded dogfish	Chiloscyllium griseum	2012-06-06	6.7
Fukushima	17.8103	141.042	37.5847	Demersal	Japanese black porgy	Acanthopagrus schlegelii	2012-06-06	60
Fukushima	17.8103	141.042	37.5847	Demersal	Common skate	Raja kenojei	2012-06-06	110
Fukushima	14.4504	141.062	37.5528	Demersal	Common skate	Raja kenojei	2012-06-06	230
Fukushima	17.8103	141.042	37.5847	Demersal	Drumfish		2012-06-06	44
Fukushima	14.4504	141.062	37.5528	Demersal	Drumfish		2012-06-06	49
Fukushima	17.8103	141.042	37.5847	Demersal	Flatfish		2012-06-06	46
Fukushima	14.4504	141.062	37.5528	Demersal	Flatfish		2012-06-06	67
Fukushima	14.4504	141.062	37.5528	Demersal	Marbled sole	Pseudopleuronectes yokohamae	2012-06-06	39
Fukushima	17.8103	141.042	37.5847	Demersal	Korean rockfish	Sebastes schlegelii	2012-06-06	370
Fukushima	14.4504	141.062	37.5528	Demersal	Seabass	Lateolabrax japonicus	2012-06-06	310
Fukushima	17.8103	141.042	37.5847	Demersal	Seabass	Lateolabrax japonicus	2012-06-06	410
Fukushima	14.4504	141.062	37.5528	Demersal	Starry flounder	Platichthys stellatus	2012-06-06	340
Fukushima	17.8103	141.042	37.5847	Demersal	Pitted stingray	Dasyatis matsubarai	2012-06-06	120
Fukushima	14.4504	141.062	37.5528	Demersal	Monkfish	Lophius litulon	2012-06-06	6.6
Fukushima	23.977	141.041	37.6402	Demersal	Willowy flounder	Tanakius kitaharai	2012-06-12	7.19
Fukushima	23.977	141.041	37.6402	Demersal	Sea raven	Hemitripterus villosus	2012-06-12	85.4
Fukushima	23.977	141.041	37.6402	Demersal	Redwing searobin	Lepidotrigla microptera	2012-06-13	52.3
Fukushima	23.977	141.041	37.6402	Demersal	Red seabream	Pagrus major	2012-06-13	15.1
Fukushima	23.977	141.041	37.6402	Demersal	Shotted halibut	Eopsetta grigorjewi	2012-06-13	19.7
Fukushima	23.977	141.041	37.6402	Demersal	Gurnard	Chelidonichthys spinosus	2012-06-13	47.9
Fukushima	23.977	141.041	37.6402	Demersal	Ocellate spot skate	Okamejei kenojei	2012-06-13	75.8
Fukushima	23.977	141.041	37.6402	Demersal	Japanese black rockfish	Sebastes cheni	2012-06-13	101
Fukushima	23.977	141.041	37.6402	Demersal	Nibe croaker	Nibea mitsukurii	2012-06-13	30.8
Fukushima	23.977	141.041	37.6402	Demersal	Fat greenling	Hexagrammos otakii	2012-06-13	84.9
Fukushima	23.977	141.041	37.6402	Demersal	Olive flounder	Paralichthys olivaceus	2012-06-13	106
Fukushima	23.977	141.041	37.6402	Demersal	Stone flounder	Kareius bicoloratus	2012-06-13	24.6
Fukushima	23.977	141.041	37.6402	Demersal	Marbled flounder	Pleuronectes yokohamae	2012-06-13	27.1
Fukushima	20.3127	141.233	37.5167	Demersal	Common horse mackerel		2012-06-14	5.9
Fukushima	20.1102	141.217	37.5333	Demersal	Common horse mackerel		2012-06-14	8.6
Fukushima	20.1102	141.217	37.5333	Demersal	Flatfish		2012-06-14	16
Fukushima	20.3127	141.233	37.5167	Demersal	Flatfish		2012-06-14	21
Fukushima	20.3127	141.233	37.5167	Demersal	Fat greenling	Hexagrammos otakii	2012-06-14	9.3
Fukushima	20.1102	141.217	37.5333	Demersal	Fat greenling	Hexagrammos otakii	2012-06-14	32
Fukushima	20.3127	141.233	37.5167	Demersal	Littlemouth flounder	Pseudopleuronectes herzensteini	2012-06-14	8.3
Fukushima	20.3127	141.233	37.5167	Demersal	Marbled sole	Pseudopleuronectes yokohamae	2012-06-14	82
Fukushima	20.1102	141.217	37.5333	Demersal	Redwing searobin	Lepidotrigla microptera	2012-06-14	13
Fukushima	20.3127	141.233	37.5167	Demersal	Redwing searobin	Lepidotrigla microptera	2012-06-14	18
Fukushima	20.3127	141.233	37.5167	Demersal	Sea raven	Hemitripterus villosus	2012-06-14	27
Fukushima	20.3127	141.233	37.5167	Demersal	Slime flounder	Microstomus achne	2012-06-14	27
Fukushima	20.1102	141.217	37.5333	Demersal	Slime flounder	Microstomus achne	2012-06-14	31
Fukushima	20.3127	141.233	37.5167	Demersal	Monkfish	Lophius litulon	2012-06-14	8.7
Fukushima	20.1102	141.217	37.5333	Demersal	Monkfish	Lophius litulon	2012-06-14	19
Fukushima	17.807	141.039	37.265	Demersal	Common skate	Raja kenojei	2012-06-16	600
Fukushima	17.807	141.039	37.265	Demersal	Flatfish		2012-06-16	130
Fukushima	17.807	141.039	37.265	Demersal	Fat greenling	Hexagrammos otakii	2012-06-16	340
Fukushima	17.807	141.039	37.265	Demersal	Marbled sole	Pseudopleuronectes yokohamae	2012-06-16	490
Fukushima	17.807	141.039	37.265	Demersal	Silver croaker	Pennahia argentata	2012-06-16	17
Fukushima	17.807	141.039	37.265	Demersal	Slime flounder	Microstomus achne	2012-06-16	570
Fukushima	23.7828	141.025	37.2114	Demersal	Japanese black rockfish	Sebastes cheni	2012-06-17	928
Fukushima	23.7828	141.025	37.2114	Demersal	Goldeye rockfish	Sebastes thompsoni	2012-06-17	75.2
Fukushima	23.7828	141.025	37.2114	Demersal	Fox jacopever	Sebastes vulpes	2012-06-17	8.56
Fukushima	13.1877	141.149	37.3483	Demersal	Common skate	Raja kenojei	2012-06-18	170
Fukushima	13.1877	141.149	37.3483	Demersal	Crimson sea bream	Evynnis japonica	2012-06-18	9.8
Fukushima	13.1877	141.149	37.3483	Demersal	Dory	Zenopsis nebulosa	2012-06-18	6.8
Fukushima	13.1877	141.149	37.3483	Demersal	Flatfish		2012-06-18	41
Fukushima	13.1877	141.149	37.3483	Demersal	Fat greenling	Hexagrammos otakii	2012-06-18	83
Fukushima	13.1877	141.149	37.3483	Demersal	Marbled sole	Pseudopleuronectes yokohamae	2012-06-18	76
Fukushima	13.1877	141.149	37.3483	Demersal	Redwing searobin	Lepidotrigla microptera	2012-06-18	32
Fukushima	13.1877	141.149	37.3483	Demersal	Shotted halibut	Eopsetta grigorjewi	2012-06-18	6.4
Fukushima	23.7828	141.025	37.2114	Demersal	Olive flounder	Paralichthys olivaceus	2012-06-18	249
Fukushima	13.1877	141.149	37.3483	Demersal	Slime flounder	Microstomus achne	2012-06-18	59
Fukushima	13.1877	141.149	37.3483	Demersal	Monkfish	Lophius litulon	2012-06-18	6.9
Fukushima	23.7828	141.025	37.2114	Demersal	Slime flounder	Microstomus achne	2012-06-18	38.8
Fukushima	23.7828	141.025	37.2114	Demersal	Willowy flounder	Tanakius kitaharai	2012-06-18	11.5
Fukushima	23.7828	141.025	37.2114	Demersal	Sea raven	Hemitripterus villosus	2012-06-18	268
Fukushima	23.7828	141.025	37.2114	Demersal	Littlemouth flounder	Pleuronectes herzensteini	2012-06-18	35.8
Fukushima	23.7828	141.025	37.2114	Demersal	Redwing searobin	Lepidotrigla microptera	2012-06-18	10.7
Fukushima	23.7828	141.025	37.2114	Demersal	Shotted halibut	Eopsetta grigorjewi	2012-06-18	13.6
Fukushima	23.977	141.041	37.6402	Demersal	Alaska pollock	Theragra chalcogramma	2012-06-19	51.9
Fukushima	23.7828	141.025	37.2114	Demersal	Fat greenling	Hexagrammos otakii	2012-06-19	366
Fukushima	23.7828	141.025	37.2114	Demersal	Japanese black rockfish	Sebastes cheni	2012-06-19	921
Fukushima	15.1506	141.039	37.5609	Demersal	Slime flounder	Microstomus achne	2012-06-19	8.62
Fukushima	15.1506	141.039	37.5609	Demersal	Alaska pollock	Theragra chalcogramma	2012-06-19	14.3
Fukushima	15.1506	141.039	37.5609	Demersal	Flathead flounder	Hippoglossoides dubius	2012-06-19	25.2
Fukushima	23.7828	141.025	37.2114	Demersal	Japanese black rockfish	Sebastes cheni	2012-06-24	993
Fukushima	23.7828	141.025	37.2114	Demersal	Goldeye rockfish	Sebastes thompsoni	2012-06-24	15
Fukushima	23.7828	141.025	37.2114	Demersal	Fat greenling	Hexagrammos otakii	2012-06-24	289
Fukushima	23.7828	141.025	37.2114	Demersal	Olive flounder	Paralichthys olivaceus	2012-06-25	105
Fukushima	23.7828	141.025	37.2114	Demersal	Slime flounder	Microstomus achne	2012-06-25	346
Fukushima	23.7828	141.025	37.2114	Demersal	Marbled flounder	Pleuronectes yokohamae	2012-06-25	330
Fukushima	23.7828	141.025	37.2114	Demersal	Japanese black porgy	Acanthopagrus schlegelii	2012-06-25	126
Fukushima	23.7828	141.025	37.2114	Demersal	Ocellate spot skate	Okamejei kenojei	2012-06-25	480
Fukushima	23.7828	141.025	37.2114	Demersal	Nibe croaker	Nibea mitsukurii	2012-06-25	93.1
Fukushima	2.51452	141.046	37.4455	Demersal	Pacific cod	Gadus macrocephalus	2012-06-26	19.2
Fukushima	2.51452	141.046	37.4455	Demersal	Flathead flounder	Hippoglossoides dubius	2012-06-26	24.2
Fukushima	23.977	141.041	37.6402	Demersal	Fat greenling	Hexagrammos otakii	2012-06-26	20.4
Fukushima	23.977	141.041	37.6402	Demersal	Japanese sandlance	Ammodytes personatus	2012-06-26	34.4
Fukushima	23.977	141.041	37.6402	Demersal	Olive flounder	Paralichthys olivaceus	2012-06-26	13.9
Fukushima	23.977	141.041	37.6402	Demersal	Stone flounder	Kareius bicoloratus	2012-06-26	64.6
Fukushima	23.977	141.041	37.6402	Demersal	Ocellate spot skate	Okamejei kenojei	2012-06-26	49.2
Fukushima	15.1506	141.039	37.5609	Demersal	Olive flounder	Paralichthys olivaceus	2012-06-26	12.8
Fukushima	15.1506	141.039	37.5609	Demersal	Ridged-eye flounder	Pleuronichthys cornutus	2012-06-26	26.8
Fukushima	15.1506	141.039	37.5609	Demersal	Conger eel	Conger myriaster	2012-06-26	69.8
Fukushima	15.1506	141.039	37.5609	Demersal	Willowy flounder	Tanakius kitaharai	2012-06-26	18.5
Fukushima	15.1506	141.039	37.5609	Demersal	Littlemouth flounder	Pleuronectes herzensteini	2012-06-26	25.7
Fukushima	15.1506	141.039	37.5609	Demersal	Redwing searobin	Lepidotrigla microptera	2012-06-26	16.2
Fukushima	15.1506	141.039	37.5609	Demersal	Pacific cod	Gadus macrocephalus	2012-06-26	14.9
Fukushima	15.1506	141.039	37.5609	Demersal	Globefish	Takifugu porphyreus	2012-06-26	13
Fukushima	15.1506	141.039	37.5609	Demersal	Pitted stingray	Dasyatis matsubarai	2012-06-26	59
Fukushima	2.51452	141.046	37.4455	Demersal	Slime flounder	Microstomus achne	2012-06-26	21.9
Fukushima	2.51452	141.046	37.4455	Demersal	Sea raven	Hemitripterus villosus	2012-06-26	37.6
Fukushima	23.977	141.041	37.6402	Demersal	Littlemouth flounder	Pleuronectes herzensteini	2012-06-27	21.7
Fukushima	23.977	141.041	37.6402	Demersal	Olive flounder	Paralichthys olivaceus	2012-06-27	74.9
Fukushima	23.977	141.041	37.6402	Demersal	Barfin flounder	Verasper moseri	2012-06-27	50.6
Fukushima	23.977	141.041	37.6402	Demersal	Marbled flounder	Pleuronectes yokohamae	2012-06-27	30.2
Fukushima	15.1506	141.039	37.5609	Demersal	Brown hakeling	Physiculus maximowiczi	2012-07-03	11.4
Fukushima	15.1506	141.039	37.5609	Demersal	Sea raven	Hemitripterus villosus	2012-07-03	19
Fukushima	15.1506	141.039	37.5609	Demersal	Alaska pollock	Theragra chalcogramma	2012-07-03	22
Fukushima	15.1506	141.039	37.5609	Demersal	Pacific cod	Gadus macrocephalus	2012-07-03	10.5
Fukushima	15.1506	141.039	37.5609	Demersal	Flathead flounder	Hippoglossoides dubius	2012-07-03	8.89
Fukushima	15.1506	141.039	37.5609	Demersal	Flathead flounder	Hippoglossoides dubius	2012-07-03	8.77
Fukushima	17.8103	141.042	37.5847	Demersal	Banded dogfish	Chiloscyllium griseum	2012-07-04	4.4
Fukushima	17.8103	141.042	37.5847	Demersal	Japanese black porgy	Acanthopagrus schlegelii	2012-07-04	93
Fukushima	14.4504	141.062	37.5528	Demersal	Common horse mackerel		2012-07-04	22
Fukushima	17.8103	141.042	37.5847	Demersal	Common skate	Raja kenojei	2012-07-04	110
Fukushima	14.4504	141.062	37.5528	Demersal	Common skate	Raja kenojei	2012-07-04	140
Fukushima	17.8103	141.042	37.5847	Demersal	Drumfish		2012-07-04	38
Fukushima	14.4504	141.062	37.5528	Demersal	Flatfish		2012-07-04	56
Fukushima	17.8103	141.042	37.5847	Demersal	Flatfish		2012-07-04	84
Fukushima	17.8103	141.042	37.5847	Demersal	Fat greenling	Hexagrammos otakii	2012-07-04	47
Fukushima	14.4504	141.062	37.5528	Demersal	Fat greenling	Hexagrammos otakii	2012-07-04	80
Fukushima	14.4504	141.062	37.5528	Demersal	Marbled sole	Pseudopleuronectes yokohamae	2012-07-04	48
Fukushima	14.4504	141.062	37.5528	Demersal	Red seabream	Pagrus major	2012-07-04	18
Fukushima	17.8103	141.042	37.5847	Demersal	Seabass	Lateolabrax japonicus	2012-07-04	300
Fukushima	17.8103	141.042	37.5847	Demersal	Silver croaker	Pennahia argentata	2012-07-04	13
Fukushima	14.4504	141.062	37.5528	Demersal	Slime flounder	Microstomus achne	2012-07-04	110
Fukushima	17.8103	141.042	37.5847	Demersal	Pitted stingray	Dasyatis matsubarai	2012-07-04	30
Fukushima	23.7828	141.025	37.2114	Demersal	Goldeye rockfish	Sebastes thompsoni	2012-07-05	20.2
Fukushima	23.7828	141.025	37.2114	Demersal	Marbled flounder	Pleuronectes yokohamae	2012-07-06	84
Fukushima	23.7828	141.025	37.2114	Demersal	Littlemouth flounder	Pleuronectes herzensteini	2012-07-06	43.6
Fukushima	23.7828	141.025	37.2114	Demersal	Redwing searobin	Lepidotrigla microptera	2012-07-06	11.7
Fukushima	23.7828	141.025	37.2114	Demersal	Ocellate spot skate	Okamejei kenojei	2012-07-06	170
Fukushima	23.7828	141.025	37.2114	Demersal	Fat greenling	Hexagrammos otakii	2012-07-06	32.6
Fukushima	23.7828	141.025	37.2114	Demersal	Olive flounder	Paralichthys olivaceus	2012-07-06	115
Fukushima	23.7828	141.025	37.2114	Demersal	Starspotted smooth-hound	Mustelus manazo	2012-07-06	41.9
Fukushima	23.7828	141.025	37.2114	Demersal	Japanese black rockfish	Sebastes cheni	2012-07-08	394
Fukushima	23.7828	141.025	37.2114	Demersal	Goldeye rockfish	Sebastes thompsoni	2012-07-08	43.6
Fukushima	23.7828	141.025	37.2114	Demersal	Fat greenling	Hexagrammos otakii	2012-07-08	105
Fukushima	10.7249	141.154	37.4078	Demersal	Common skate	Raja kenojei	2012-07-09	130
Fukushima	13.1877	141.149	37.3483	Demersal	Common skate	Raja kenojei	2012-07-09	150
Fukushima	10.7249	141.154	37.4078	Demersal	Dory	Zenopsis nebulosa	2012-07-09	13
Fukushima	13.1877	141.149	37.3483	Demersal	Flatfish		2012-07-09	18
Fukushima	10.7249	141.154	37.4078	Demersal	Flatfish		2012-07-09	94
Fukushima	10.7249	141.154	37.4078	Demersal	Fat greenling	Hexagrammos otakii	2012-07-09	190
Fukushima	13.1877	141.149	37.3483	Demersal	Littlemouth flounder	Pseudopleuronectes herzensteini	2012-07-09	29
Fukushima	10.7249	141.154	37.4078	Demersal	Littlemouth flounder	Pseudopleuronectes herzensteini	2012-07-09	31
Fukushima	10.7249	141.154	37.4078	Demersal	Marbled sole	Pseudopleuronectes yokohamae	2012-07-09	44
Fukushima	13.1877	141.149	37.3483	Demersal	Marbled sole	Pseudopleuronectes yokohamae	2012-07-09	88
Fukushima	23.7828	141.025	37.2114	Demersal	Olive flounder	Paralichthys olivaceus	2012-07-09	59.9
Fukushima	13.1877	141.149	37.3483	Demersal	Redwing searobin	Lepidotrigla microptera	2012-07-09	6.9
Fukushima	10.7249	141.154	37.4078	Demersal	Redwing searobin	Lepidotrigla microptera	2012-07-09	11
Fukushima	10.7249	141.154	37.4078	Demersal	Slime flounder	Microstomus achne	2012-07-09	72
Fukushima	13.1877	141.149	37.3483	Demersal	Slippery sole	Microstomus Pacificus	2012-07-09	13
Fukushima	10.7249	141.154	37.4078	Demersal	Slippery sole	Microstomus Pacificus	2012-07-09	24
Fukushima	10.7249	141.154	37.4078	Demersal	Stone flounder	Kareius bicoloratus	2012-07-09	39
Fukushima	10.7249	141.154	37.4078	Demersal	Monkfish	Lophius litulon	2012-07-09	4.9
Fukushima	23.7828	141.025	37.2114	Demersal	Conger eel	Conger myriaster	2012-07-09	13.6
Fukushima	23.7828	141.025	37.2114	Demersal	Rikuzen flounder	Dexistes rikuzenius	2012-07-09	13.2
Fukushima	23.7828	141.025	37.2114	Demersal	Willowy flounder	Tanakius kitaharai	2012-07-09	13.7
Fukushima	23.7828	141.025	37.2114	Demersal	Sea raven	Hemitripterus villosus	2012-07-09	36
Fukushima	23.7828	141.025	37.2114	Demersal	Marbled flounder	Pleuronectes yokohamae	2012-07-09	35.7
Fukushima	23.7828	141.025	37.2114	Demersal	Littlemouth flounder	Pleuronectes herzensteini	2012-07-09	19.7
Fukushima	23.7828	141.025	37.2114	Demersal	Silver Croaker	Argyrosomus argentatus	2012-07-09	14.7
Fukushima	23.7828	141.025	37.2114	Demersal	Shotted halibut	Eopsetta grigorjewi	2012-07-09	289
Fukushima	23.7828	141.025	37.2114	Demersal	Nibe croaker	Nibea mitsukurii	2012-07-09	20.2
Fukushima	23.977	141.041	37.6402	Demersal	Fat greenling	Hexagrammos otakii	2012-07-12	76.1
Fukushima	23.7828	141.025	37.2114	Demersal	Fox jacopever	Sebastes vulpes	2012-07-12	378
Fukushima	23.977	141.041	37.6402	Demersal	Olive flounder	Paralichthys olivaceus	2012-07-12	59.6
Fukushima	23.977	141.041	37.6402	Demersal	Marbled flounder	Pleuronectes yokohamae	2012-07-12	25.6
Fukushima	23.977	141.041	37.6402	Demersal	Silver Croaker	Argyrosomus argentatus	2012-07-12	12.5
Fukushima	23.977	141.041	37.6402	Demersal	Ocellate spot skate	Okamejei kenojei	2012-07-12	97.9
Fukushima	23.7828	141.025	37.2114	Demersal	Fat greenling	Hexagrammos otakii	2012-07-12	401
Fukushima	23.7828	141.025	37.2114	Demersal	Japanese black rockfish	Sebastes cheni	2012-07-12	1070
Fukushima	23.7828	141.025	37.2114	Demersal	Goldeye rockfish	Sebastes thompsoni	2012-07-12	108
Fukushima	12.7154	141.047	37.3111	Demersal	Banded dogfish	Chiloscyllium griseum	2012-07-15	5
Fukushima	17.807	141.039	37.265	Demersal	Banded dogfish	Chiloscyllium griseum	2012-07-15	7.1
Fukushima	12.7154	141.047	37.3111	Demersal	Barfin flounder	Verasper moseri	2012-07-15	1000
Fukushima	17.807	141.039	37.265	Demersal	Common skate	Raja kenojei	2012-07-15	300
Fukushima	12.7154	141.047	37.3111	Demersal	Common skate	Raja kenojei	2012-07-15	460
Fukushima	12.7154	141.047	37.3111	Demersal	Drumfish		2012-07-15	71
Fukushima	12.7154	141.047	37.3111	Demersal	Flatfish		2012-07-15	35
Fukushima	17.807	141.039	37.265	Demersal	Flatfish		2012-07-15	110
Fukushima	17.807	141.039	37.265	Demersal	Fat greenling	Hexagrammos otakii	2012-07-15	310
Fukushima	12.7154	141.047	37.3111	Demersal	Fat greenling	Hexagrammos otakii	2012-07-15	560
Fukushima	17.807	141.039	37.265	Demersal	Marbled sole	Pseudopleuronectes yokohamae	2012-07-15	77
Fukushima	12.7154	141.047	37.3111	Demersal	Marbled sole	Pseudopleuronectes yokohamae	2012-07-15	270
Fukushima	17.807	141.039	37.265	Demersal	Japanese black rockfish	Sebastes cheni	2012-07-15	990
Fukushima	12.7154	141.047	37.3111	Demersal	Seabass	Lateolabrax japonicus	2012-07-15	56
Fukushima	17.807	141.039	37.265	Demersal	Silver croaker	Pennahia argentata	2012-07-15	24
Fukushima	17.807	141.039	37.265	Demersal	Slime flounder	Microstomus achne	2012-07-15	290
Fukushima	12.7154	141.047	37.3111	Demersal	Slime flounder	Microstomus achne	2012-07-15	390
Fukushima	23.977	141.041	37.6402	Demersal	Slime flounder	Microstomus achne	2012-07-18	15.8
Fukushima	23.977	141.041	37.6402	Demersal	Marbled flounder	Pleuronectes yokohamae	2012-07-18	13.7
Fukushima	5.39219	141.079	37.4583	Demersal	Common skate	Raja kenojei	2012-07-18	160
Fukushima	4.23837	141.083	37.4286	Demersal	Common skate	Raja kenojei	2012-07-18	210
Fukushima	4.23837	141.083	37.4286	Demersal	Flatfish		2012-07-18	41
Fukushima	5.39219	141.079	37.4583	Demersal	Flatfish		2012-07-18	150
Fukushima	4.23837	141.083	37.4286	Demersal	Fat greenling	Hexagrammos otakii	2012-07-18	130
Fukushima	5.39219	141.079	37.4583	Demersal	Fat greenling	Hexagrammos otakii	2012-07-18	130
Fukushima	5.39219	141.079	37.4583	Demersal	Marbled sole	Pseudopleuronectes yokohamae	2012-07-18	63
Fukushima	4.23837	141.083	37.4286	Demersal	Marbled sole	Pseudopleuronectes yokohamae	2012-07-18	150
Fukushima	4.23837	141.083	37.4286	Demersal	Pitted stingray	Dasyatis matsubarai	2012-07-18	39
Fukushima	5.39219	141.079	37.4583	Demersal	Red seabream	Pagrus major	2012-07-18	13
Fukushima	5.39219	141.079	37.4583	Demersal	Korean rockfish	Sebastes schlegelii	2012-07-18	310
Fukushima	4.23837	141.083	37.4286	Demersal	Seabass	Lateolabrax japonicus	2012-07-18	150
Fukushima	4.23837	141.083	37.4286	Demersal	Sea robin		2012-07-18	41
Fukushima	5.39219	141.079	37.4583	Demersal	Slime flounder	Microstomus achne	2012-07-18	190
Fukushima	4.23837	141.083	37.4286	Demersal	Slime flounder	Microstomus achne	2012-07-18	270
Fukushima	23.977	141.041	37.6402	Demersal	Fat greenling	Hexagrammos otakii	2012-07-18	75.3
Fukushima	23.977	141.041	37.6402	Demersal	Olive flounder	Paralichthys olivaceus	2012-07-18	23.7
Fukushima	2.51452	141.046	37.4455	Demersal	Sea raven	Hemitripterus villosus	2012-07-19	24.7
Fukushima	23.977	141.041	37.6402	Demersal	Conger eel	Conger myriaster	2012-07-19	69.4
Fukushima	23.977	141.041	37.6402	Demersal	Slime flounder	Microstomus achne	2012-07-19	18.9
Fukushima	23.977	141.041	37.6402	Demersal	John Dory	Zeus faber	2012-07-19	11.4
Fukushima	23.977	141.041	37.6402	Demersal	Japanese black rockfish	Sebastes cheni	2012-07-19	31.7
Fukushima	6.43311	141.05	37.4814	Demersal	Rikuzen flounder	Dexistes rikuzenius	2012-07-19	5.7
Fukushima	6.43311	141.05	37.4814	Demersal	Sea raven	Hemitripterus villosus	2012-07-19	12.6
Fukushima	6.43311	141.05	37.4814	Demersal	Pacific cod	Gadus macrocephalus	2012-07-19	15.1
Fukushima	6.43311	141.05	37.4814	Demersal	Flathead flounder	Hippoglossoides dubius	2012-07-19	7.6
Fukushima	6.43311	141.05	37.4814	Demersal	Roughscale sole	Clidoderma asperrimum	2012-07-19	8.93
Fukushima	23.7828	141.025	37.2114	Demersal	Fat greenling	Hexagrammos otakii	2012-07-22	259
Fukushima	23.7828	141.025	37.2114	Demersal	Japanese black rockfish	Sebastes cheni	2012-07-22	318
Fukushima	23.7828	141.025	37.2114	Demersal	Korean rockfish	Sebastes schlegelii	2012-07-22	68.2
Fukushima	23.977	141.041	37.6402	Demersal	Slime flounder	Microstomus achne	2012-07-23	18.7
Fukushima	23.977	141.041	37.6402	Demersal	Sea raven	Hemitripterus villosus	2012-07-23	10
Fukushima	23.977	141.041	37.6402	Demersal	Littlemouth flounder	Pleuronectes herzensteini	2012-07-23	11.5
Fukushima	6.04977	141.079	37.3833	Demersal	Common skate	Raja kenojei	2012-07-23	270
Fukushima	6.04977	141.079	37.3833	Demersal	Flatfish		2012-07-23	92
Fukushima	23.977	141.041	37.6402	Demersal	Redwing searobin	Lepidotrigla microptera	2012-07-23	12.5
Fukushima	6.04977	141.079	37.3833	Demersal	Flathead	Platycephalus sp.	2012-07-23	120
Fukushima	6.04977	141.079	37.3833	Demersal	Marbled sole	Pseudopleuronectes yokohamae	2012-07-23	120
Fukushima	6.04977	141.079	37.3833	Demersal	Sea robin		2012-07-23	64
Fukushima	6.04977	141.079	37.3833	Demersal	Slime flounder	Microstomus achne	2012-07-23	230
Fukushima	23.977	141.041	37.6402	Demersal	Fat greenling	Hexagrammos otakii	2012-07-23	12.8
Fukushima	23.977	141.041	37.6402	Demersal	Olive flounder	Paralichthys olivaceus	2012-07-23	69.6
Fukushima	23.977	141.041	37.6402	Demersal	Conger eel	Conger myriaster	2012-07-23	12.1
Fukushima	6.43311	141.05	37.4814	Demersal	Rikuzen flounder	Dexistes rikuzenius	2012-07-24	7.09
Fukushima	6.43311	141.05	37.4814	Demersal	Slime flounder	Microstomus achne	2012-07-24	199
Fukushima	6.43311	141.05	37.4814	Demersal	Brown hakeling	Physiculus maximowiczi	2012-07-24	9.15
Fukushima	6.43311	141.05	37.4814	Demersal	Alaska pollock	Theragra chalcogramma	2012-07-24	26.5
Fukushima	6.43311	141.05	37.4814	Demersal	Pacific cod	Gadus macrocephalus	2012-07-24	7.86
Fukushima	23.7828	141.025	37.2114	Demersal	Conger eel	Conger myriaster	2012-07-30	20.5
Fukushima	23.7828	141.025	37.2114	Demersal	Rikuzen flounder	Dexistes rikuzenius	2012-07-30	6.93
Fukushima	23.7828	141.025	37.2114	Demersal	Sea raven	Hemitripterus villosus	2012-07-30	90.4
Fukushima	23.7828	141.025	37.2114	Demersal	Monkfish	Lophius litulon	2012-07-30	9.88
Fukushima	23.7828	141.025	37.2114	Demersal	Fat greenling	Hexagrammos otakii	2012-07-30	210
Fukushima	23.977	141.041	37.6402	Demersal	Sea raven	Hemitripterus villosus	2012-08-01	24.5
Fukushima	23.977	141.041	37.6402	Demersal	Littlemouth flounder	Pleuronectes herzensteini	2012-08-01	22.7
Fukushima	14.4504	141.062	37.5528	Demersal	Banded dogfish	Chiloscyllium griseum	2012-08-01	16
Fukushima	14.4504	141.062	37.5528	Demersal	Common skate	Raja kenojei	2012-08-01	150
Fukushima	17.8103	141.042	37.5847	Demersal	Common skate	Raja kenojei	2012-08-01	160
Fukushima	17.8103	141.042	37.5847	Demersal	Drumfish		2012-08-01	49
Fukushima	17.8103	141.042	37.5847	Demersal	Flatfish		2012-08-01	45
Fukushima	14.4504	141.062	37.5528	Demersal	Flatfish		2012-08-01	78
Fukushima	17.8103	141.042	37.5847	Demersal	Fat greenling	Hexagrammos otakii	2012-08-01	16000
Fukushima	14.4504	141.062	37.5528	Demersal	Marbled sole	Pseudopleuronectes yokohamae	2012-08-01	13
Fukushima	14.4504	141.062	37.5528	Demersal	Pitted stingray	Dasyatis matsubarai	2012-08-01	51
Fukushima	14.4504	141.062	37.5528	Demersal	Red seabream	Pagrus major	2012-08-01	21
Fukushima	17.8103	141.042	37.5847	Demersal	Seabass	Lateolabrax japonicus	2012-08-01	39
Fukushima	17.8103	141.042	37.5847	Demersal	Pitted stingray	Dasyatis matsubarai	2012-08-01	91
Fukushima	23.977	141.041	37.6402	Demersal	Conger eel	Conger myriaster	2012-08-01	15.8
Fukushima	23.977	141.041	37.6402	Demersal	Willowy flounder	Tanakius kitaharai	2012-08-01	40.6
Fukushima	23.7828	141.025	37.2114	Demersal	Olive flounder	Paralichthys olivaceus	2012-08-03	9.91
Fukushima	23.7828	141.025	37.2114	Demersal	Marbled flounder	Pleuronectes yokohamae	2012-08-03	70.4
Fukushima	23.7828	141.025	37.2114	Demersal	Crimson sea bream	Evynnis japonica	2012-08-03	21.4
Fukushima	23.7828	141.025	37.2114	Demersal	Ocellate spot skate	Okamejei kenojei	2012-08-03	184
Fukushima	23.7828	141.025	37.2114	Demersal	Seabass	Lateolabrax japonicus	2012-08-05	53.7
Fukushima	23.7828	141.025	37.2114	Demersal	Japanese black rockfish	Sebastes cheni	2012-08-05	437
Fukushima	23.7828	141.025	37.2114	Demersal	Korean rockfish	Sebastes schlegelii	2012-08-05	13.2
Fukushima	23.7828	141.025	37.2114	Demersal	Fat greenling	Hexagrammos otakii	2012-08-05	207
Fukushima	2.51452	141.046	37.4455	Demersal	Sohachi flounder	Cleisthenes pinetorum	2012-08-06	9.73
Fukushima	2.51452	141.046	37.4455	Demersal	Willowy flounder	Tanakius kitaharai	2012-08-06	8.94
Fukushima	2.51452	141.046	37.4455	Demersal	Brown hakeling	Physiculus maximowiczi	2012-08-06	10.1
Fukushima	2.51452	141.046	37.4455	Demersal	Sea raven	Hemitripterus villosus	2012-08-06	26.3
Fukushima	23.977	141.041	37.6402	Demersal	Fat greenling	Hexagrammos otakii	2012-08-06	26.3
Fukushima	23.977	141.041	37.6402	Demersal	Slime flounder	Microstomus achne	2012-08-06	9.98
Fukushima	6.43311	141.05	37.4814	Demersal	Sohachi flounder	Cleisthenes pinetorum	2012-08-06	13.7
Fukushima	6.43311	141.05	37.4814	Demersal	Slime flounder	Microstomus achne	2012-08-06	14.7
Fukushima	6.43311	141.05	37.4814	Demersal	Sea raven	Hemitripterus villosus	2012-08-06	34.1
Fukushima	6.43311	141.05	37.4814	Demersal	Pacific cod	Gadus macrocephalus	2012-08-06	37
Fukushima	23.977	141.041	37.6402	Demersal	Stone flounder	Kareius bicoloratus	2012-08-08	253
Fukushima	23.977	141.041	37.6402	Demersal	Slime flounder	Microstomus achne	2012-08-08	36.7
Fukushima	23.977	141.041	37.6402	Demersal	Marbled flounder	Pleuronectes yokohamae	2012-08-08	17.1
Fukushima	23.977	141.041	37.6402	Demersal	Silver Croaker	Argyrosomus argentatus	2012-08-08	60.8
Fukushima	23.977	141.041	37.6402	Demersal	Red seabream	Pagrus major	2012-08-08	32
Fukushima	23.977	141.041	37.6402	Demersal	Shotted halibut	Eopsetta grigorjewi	2012-08-08	12.8
Fukushima	23.977	141.041	37.6402	Demersal	Ocellate spot skate	Okamejei kenojei	2012-08-08	42.2
Fukushima	23.977	141.041	37.6402	Demersal	Ocellate spot skate	Okamejei kenojei	2012-08-08	37.6
Fukushima	23.977	141.041	37.6402	Demersal	Red tongue sole	Cynoglossus joyneri	2012-08-08	20.2
Fukushima	23.977	141.041	37.6402	Demersal	Nibe croaker	Nibea mitsukurii	2012-08-08	32.6
Fukushima	23.977	141.041	37.6402	Demersal	Spiny dogfish	Squalus acanthias	2012-08-08	17.9
Fukushima	23.977	141.041	37.6402	Demersal	Fat greenling	Hexagrammos otakii	2012-08-08	30.2
Fukushima	4.23837	141.083	37.4286	Demersal	Banded dogfish	Chiloscyllium griseum	2012-08-08	140
Fukushima	23.977	141.041	37.6402	Demersal	Seabass	Lateolabrax japonicus	2012-08-08	20.3
Fukushima	5.39219	141.079	37.4583	Demersal	Common skate	Raja kenojei	2012-08-08	110
Fukushima	5.39219	141.079	37.4583	Demersal	Drumfish		2012-08-08	61
Fukushima	5.39219	141.079	37.4583	Demersal	Flatfish		2012-08-08	81
Fukushima	4.23837	141.083	37.4286	Demersal	Flatfish		2012-08-08	100
Fukushima	4.23837	141.083	37.4286	Demersal	Fat greenling	Hexagrammos otakii	2012-08-08	170
Fukushima	4.23837	141.083	37.4286	Demersal	Pitted stingray	Dasyatis matsubarai	2012-08-08	63
Fukushima	4.23837	141.083	37.4286	Demersal	Red seabream	Pagrus major	2012-08-08	4.7
Fukushima	5.39219	141.079	37.4583	Demersal	Red seabream	Pagrus major	2012-08-08	17
Fukushima	4.23837	141.083	37.4286	Demersal	Japanese black rockfish	Sebastes cheni	2012-08-08	520
Fukushima	23.977	141.041	37.6402	Demersal	Olive flounder	Paralichthys olivaceus	2012-08-08	43.1
Fukushima	5.39219	141.079	37.4583	Demersal	Seabass	Lateolabrax japonicus	2012-08-08	70
Fukushima	5.39219	141.079	37.4583	Demersal	Slime flounder	Microstomus achne	2012-08-08	150
Fukushima	4.23837	141.083	37.4286	Demersal	Slime flounder	Microstomus achne	2012-08-08	210
Fukushima	23.977	141.041	37.6402	Demersal	Olive flounder	Paralichthys olivaceus	2012-08-08	68.8
Fukushima	17.807	141.039	37.265	Demersal	Common skate	Raja kenojei	2012-08-11	320
Fukushima	12.7154	141.047	37.3111	Demersal	Common skate	Raja kenojei	2012-08-11	540
Fukushima	12.7154	141.047	37.3111	Demersal	Flatfish		2012-08-11	54
Fukushima	17.807	141.039	37.265	Demersal	Flatfish		2012-08-11	120
Fukushima	12.7154	141.047	37.3111	Demersal	Seabass	Lateolabrax japonicus	2012-08-11	520
Fukushima	12.7154	141.047	37.3111	Demersal	Angel shark	Squatina sp.	2012-08-11	39
Fukushima	17.807	141.039	37.265	Demersal	Angel shark	Squatina sp.	2012-08-11	130
Fukushima	16.4957	141.032	37.2768	Demersal	Fat greenling	Hexagrammos otakii	2012-08-16	341
Fukushima	15.1506	141.039	37.5609	Demersal	Olive flounder	Paralichthys olivaceus	2012-08-16	43.8
Fukushima	16.4957	141.032	37.2768	Demersal	Goldeye rockfish	Sebastes thompsoni	2012-08-19	340
Fukushima	16.4957	141.032	37.2768	Demersal	Japanese black rockfish	Sebastes cheni	2012-08-19	562
Fukushima	10.7249	141.154	37.4078	Demersal	Common skate	Raja kenojei	2012-08-20	150
Fukushima	13.1877	141.149	37.3483	Demersal	Common skate	Raja kenojei	2012-08-20	190
Fukushima	10.7249	141.154	37.4078	Demersal	Dory	Zenopsis nebulosa	2012-08-20	19
Fukushima	13.1877	141.149	37.3483	Demersal	Dory	Zenopsis nebulosa	2012-08-20	41
Fukushima	10.7249	141.154	37.4078	Demersal	Flatfish		2012-08-20	5.9
Fukushima	13.1877	141.149	37.3483	Demersal	Flatfish		2012-08-20	28
Fukushima	10.7249	141.154	37.4078	Demersal	Fat greenling	Hexagrammos otakii	2012-08-20	30
Fukushima	13.1877	141.149	37.3483	Demersal	Fat greenling	Hexagrammos otakii	2012-08-20	150
Fukushima	13.1877	141.149	37.3483	Demersal	Marbled sole	Pseudopleuronectes yokohamae	2012-08-20	58
Fukushima	13.1877	141.149	37.3483	Demersal	Redwing searobin	Lepidotrigla microptera	2012-08-20	15
Fukushima	10.7249	141.154	37.4078	Demersal	Redwing searobin	Lepidotrigla microptera	2012-08-20	27
Fukushima	10.7249	141.154	37.4078	Demersal	Slime flounder	Microstomus achne	2012-08-20	46
Fukushima	13.1877	141.149	37.3483	Demersal	Slime flounder	Microstomus achne	2012-08-20	130
Fukushima	13.1877	141.149	37.3483	Demersal	Stone flounder	Kareius bicoloratus	2012-08-20	24
Fukushima	10.7249	141.154	37.4078	Demersal	Stone flounder	Kareius bicoloratus	2012-08-20	47
Fukushima	10.7249	141.154	37.4078	Demersal	Monkfish	Lophius litulon	2012-08-20	6.5
Fukushima	23.977	141.041	37.6402	Demersal	Brown hakeling	Physiculus maximowiczi	2012-08-20	11.5
Fukushima	23.7828	141.025	37.2114	Demersal	Fat greenling	Hexagrammos otakii	2012-08-20	294
Fukushima	23.7828	141.025	37.2114	Demersal	Seabass	Lateolabrax japonicus	2012-08-20	45.4
Fukushima	23.7828	141.025	37.2114	Demersal	Olive flounder	Paralichthys olivaceus	2012-08-20	118
Fukushima	23.7828	141.025	37.2114	Demersal	Slime flounder	Microstomus achne	2012-08-20	477
Fukushima	23.7828	141.025	37.2114	Demersal	Surfperch	Ditrema temminckii temminckii	2012-08-20	63
Fukushima	23.7828	141.025	37.2114	Demersal	Ocellate spot skate	Okamejei kenojei	2012-08-20	532
Fukushima	23.7828	141.025	37.2114	Demersal	Brassblotched rockfish	Sebastes pachycephalus	2012-08-20	261
Fukushima	23.7828	141.025	37.2114	Demersal	Japanese black rockfish	Sebastes cheni	2012-08-20	366
Fukushima	23.7828	141.025	37.2114	Demersal	Fox jacopever	Sebastes vulpes	2012-08-20	130
Fukushima	23.7828	141.025	37.2114	Demersal	Nibe croaker	Nibea mitsukurii	2012-08-20	47.3
Fukushima	23.7828	141.025	37.2114	Demersal	Panther puffer	Takifugu pardalis	2012-08-20	25.2
Fukushima	23.7828	141.025	37.2114	Demersal	Black scraper	Thamnaconus modestus	2012-08-20	10.7
Fukushima	23.7828	141.025	37.2114	Demersal	Vermiculated puffer	Takifugu snyderi	2012-08-20	113
Fukushima	6.04977	141.079	37.3833	Demersal	Common skate	Raja kenojei	2012-08-25	240
Fukushima	6.04977	141.079	37.3833	Demersal	Flatfish		2012-08-25	100
Fukushima	6.04977	141.079	37.3833	Demersal	Flathead	Platycephalus sp.	2012-08-25	97
Fukushima	6.04977	141.079	37.3833	Demersal	Marbled sole	Pseudopleuronectes yokohamae	2012-08-25	130
Fukushima	6.04977	141.079	37.3833	Demersal	Sea robin		2012-08-25	35
Fukushima	6.04977	141.079	37.3833	Demersal	Slime flounder	Microstomus achne	2012-08-25	230
Fukushima	10.3187	141.034	37.3322	Demersal	Fat greenling	Hexagrammos otakii	2012-08-26	52.4
Fukushima	10.3187	141.034	37.3322	Demersal	Crimson sea bream	Evynnis japonica	2012-08-26	12.1
Fukushima	10.3187	141.034	37.3322	Demersal	Japanese black rockfish	Sebastes cheni	2012-08-26	1070
Fukushima	10.3187	141.034	37.3322	Demersal	Goldeye rockfish	Sebastes thompsoni	2012-08-26	30.1
Fukushima	10.3187	141.034	37.3322	Demersal	Fox jacopever	Sebastes vulpes	2012-08-26	312
Fukushima	2.51452	141.046	37.4455	Demersal	Olive flounder	Paralichthys olivaceus	2012-08-27	31
Fukushima	2.51452	141.046	37.4455	Demersal	Stone flounder	Kareius bicoloratus	2012-08-27	143
Fukushima	2.51452	141.046	37.4455	Demersal	Marbled flounder	Pleuronectes yokohamae	2012-08-27	64
Fukushima	2.51452	141.046	37.4455	Demersal	Littlemouth flounder	Pleuronectes herzensteini	2012-08-27	31.7
Fukushima	2.51452	141.046	37.4455	Demersal	Redwing searobin	Lepidotrigla microptera	2012-08-27	16.1
Fukushima	2.51452	141.046	37.4455	Demersal	Ocellate spot skate	Okamejei kenojei	2012-08-27	128
Fukushima	23.7828	141.025	37.2114	Demersal	Fat greenling	Hexagrammos otakii	2012-08-27	407
Fukushima	23.7828	141.025	37.2114	Demersal	Olive flounder	Paralichthys olivaceus	2012-08-27	165
Fukushima	23.7828	141.025	37.2114	Demersal	Conger eel	Conger myriaster	2012-08-27	124
Fukushima	23.7828	141.025	37.2114	Demersal	Japanese black porgy	Acanthopagrus schlegelii	2012-08-27	66.2
Fukushima	23.7828	141.025	37.2114	Demersal	Flathead	Platycephalus sp.	2012-08-27	312
Fukushima	23.7828	141.025	37.2114	Demersal	Nibe croaker	Nibea mitsukurii	2012-08-27	54.5
Fukushima	10.3187	141.034	37.3322	Demersal	Olive flounder	Paralichthys olivaceus	2012-08-27	7.86
Fukushima	10.3187	141.034	37.3322	Demersal	Marbled flounder	Pleuronectes yokohamae	2012-08-27	21.9
Fukushima	10.3187	141.034	37.3322	Demersal	Littlemouth flounder	Pleuronectes herzensteini	2012-08-27	14.3
Fukushima	10.3187	141.034	37.3322	Demersal	Redwing searobin	Lepidotrigla microptera	2012-08-27	12.7
Fukushima	10.3187	141.034	37.3322	Demersal	Ocellate spot skate	Okamejei kenojei	2012-08-27	204
Fukushima	10.3187	141.034	37.3322	Demersal	Vermiculated puffer	Takifugu snyderi	2012-08-27	46.2
Fukushima	10.3187	141.034	37.3322	Demersal	Flounder	Pleuronichthys japonicus	2012-08-27	6.86
Fukushima	20.3127	141.233	37.5167	Demersal	Fat greenling	Hexagrammos otakii	2012-08-28	4
Fukushima	20.3127	141.233	37.5167	Demersal	Littlemouth flounder	Pseudopleuronectes herzensteini	2012-08-28	5.7
Fukushima	20.1102	141.217	37.5333	Demersal	Marbled sole	Pseudopleuronectes yokohamae	2012-08-28	19
Fukushima	20.3127	141.233	37.5167	Demersal	Marbled sole	Pseudopleuronectes yokohamae	2012-08-28	24
Fukushima	20.1102	141.217	37.5333	Demersal	Redwing searobin	Lepidotrigla microptera	2012-08-28	12
Fukushima	20.3127	141.233	37.5167	Demersal	Redwing searobin	Lepidotrigla microptera	2012-08-28	9.6
Fukushima	20.1102	141.217	37.5333	Demersal	Slime flounder	Microstomus achne	2012-08-28	15
Fukushima	20.1102	141.217	37.5333	Demersal	Stone flounder	Kareius bicoloratus	2012-08-28	45
Fukushima	15.1506	141.039	37.5609	Demersal	Brown hakeling	Physiculus maximowiczi	2012-08-28	11.5
Fukushima	15.1506	141.039	37.5609	Demersal	Sea raven	Hemitripterus villosus	2012-08-28	16
Fukushima	15.1506	141.039	37.5609	Demersal	Pacific cod	Gadus macrocephalus	2012-08-28	23
Fukushima	20.3127	141.233	37.5167	Demersal	Balloonfish	Diodon holocanthus	2012-08-28	6
Fukushima	20.3127	141.233	37.5167	Demersal	Crimson sea bream	Evynnis japonica	2012-08-28	14
Fukushima	20.1102	141.217	37.5333	Demersal	Dory	Zenopsis nebulosa	2012-08-28	8.3
Fukushima	20.3127	141.233	37.5167	Demersal	Dory	Zenopsis nebulosa	2012-08-28	32
Fukushima	17.8103	141.042	37.5847	Demersal	Fat greenling	Hexagrammos otakii	2012-08-29	13
Fukushima	17.8103	141.042	37.5847	Demersal	Fat greenling	Hexagrammos otakii	2012-08-29	30
Fukushima	17.8103	141.042	37.5847	Demersal	Fat greenling	Hexagrammos otakii	2012-08-29	34
Fukushima	17.8103	141.042	37.5847	Demersal	Fat greenling	Hexagrammos otakii	2012-08-29	36
Fukushima	17.8103	141.042	37.5847	Demersal	Fat greenling	Hexagrammos otakii	2012-08-29	40
Fukushima	17.8103	141.042	37.5847	Demersal	Fat greenling	Hexagrammos otakii	2012-08-29	40
Fukushima	17.8103	141.042	37.5847	Demersal	Fat greenling	Hexagrammos otakii	2012-08-29	43
Fukushima	17.8103	141.042	37.5847	Demersal	Fat greenling	Hexagrammos otakii	2012-08-29	43
Fukushima	17.8103	141.042	37.5847	Demersal	Fat greenling	Hexagrammos otakii	2012-08-29	55
Fukushima	17.8103	141.042	37.5847	Demersal	Fat greenling	Hexagrammos otakii	2012-08-29	53
Fukushima	17.8103	141.042	37.5847	Demersal	Fat greenling	Hexagrammos otakii	2012-08-29	51
Fukushima	17.8103	141.042	37.5847	Demersal	Fat greenling	Hexagrammos otakii	2012-08-29	61
Fukushima	17.8103	141.042	37.5847	Demersal	Fat greenling	Hexagrammos otakii	2012-08-29	95
Fukushima	17.8103	141.042	37.5847	Demersal	Fat greenling	Hexagrammos otakii	2012-08-29	100
Fukushima	17.8103	141.042	37.5847	Demersal	Fat greenling	Hexagrammos otakii	2012-08-29	130
Fukushima	23.977	141.041	37.6402	Demersal	Slime flounder	Microstomus achne	2012-08-30	40.3
Fukushima	23.977	141.041	37.6402	Demersal	Marbled flounder	Pleuronectes yokohamae	2012-08-30	33.9
Fukushima	23.977	141.041	37.6402	Demersal	Silver Croaker	Argyrosomus argentatus	2012-08-30	21.1
Fukushima	23.977	141.041	37.6402	Demersal	John Dory	Zeus faber	2012-08-30	12.8
Fukushima	23.977	141.041	37.6402	Demersal	Japanese black rockfish	Sebastes cheni	2012-08-30	169
Fukushima	23.977	141.041	37.6402	Demersal	Nibe croaker	Nibea mitsukurii	2012-08-30	36.4
Fukushima	23.977	141.041	37.6402	Demersal	Black cow-tongue	Paraplagusia japonica	2012-08-30	30.4
Fukushima	17.8103	141.042	37.5847	Demersal	Fat greenling	Hexagrammos otakii	2012-08-30	33
Fukushima	17.8103	141.042	37.5847	Demersal	Fat greenling	Hexagrammos otakii	2012-08-30	37
Fukushima	17.8103	141.042	37.5847	Demersal	Fat greenling	Hexagrammos otakii	2012-08-30	41
Fukushima	17.8103	141.042	37.5847	Demersal	Fat greenling	Hexagrammos otakii	2012-08-30	62
Fukushima	17.8103	141.042	37.5847	Demersal	Fat greenling	Hexagrammos otakii	2012-08-30	77
Fukushima	17.8103	141.042	37.5847	Demersal	Fat greenling	Hexagrammos otakii	2012-08-30	100
Fukushima	17.8103	141.042	37.5847	Demersal	Fat greenling	Hexagrammos otakii	2012-08-30	96
Fukushima	17.8103	141.042	37.5847	Demersal	Fat greenling	Hexagrammos otakii	2012-08-30	110
Fukushima	23.977	141.041	37.6402	Demersal	Fat greenling	Hexagrammos otakii	2012-08-30	72.6
Fukushima	23.977	141.041	37.6402	Demersal	Olive flounder	Paralichthys olivaceus	2012-08-30	37.8
Fukushima	23.977	141.041	37.6402	Demersal	Fat greenling	Hexagrammos otakii	2012-09-03	19.5
Fukushima	23.977	141.041	37.6402	Demersal	Slime flounder	Microstomus achne	2012-09-03	6.71
Fukushima	23.977	141.041	37.6402	Demersal	Brown hakeling	Physiculus maximowiczi	2012-09-03	10.5
Fukushima	23.977	141.041	37.6402	Demersal	Littlemouth flounder	Pleuronectes herzensteini	2012-09-03	15
Fukushima	23.977	141.041	37.6402	Demersal	John Dory	Zeus faber	2012-09-03	15.2
Fukushima	16.4957	141.032	37.2768	Demersal	Fat greenling	Hexagrammos otakii	2012-09-03	150
Fukushima	16.4957	141.032	37.2768	Demersal	Olive flounder	Paralichthys olivaceus	2012-09-03	26.8
Fukushima	16.4957	141.032	37.2768	Demersal	Marbled flounder	Pleuronectes yokohamae	2012-09-03	18.9
Fukushima	16.4957	141.032	37.2768	Demersal	Littlemouth flounder	Pleuronectes herzensteini	2012-09-03	12.2
Fukushima	16.4957	141.032	37.2768	Demersal	Redwing searobin	Lepidotrigla microptera	2012-09-03	24.9
Fukushima	16.4957	141.032	37.2768	Demersal	Shotted halibut	Eopsetta grigorjewi	2012-09-03	15.3
Fukushima	16.4957	141.032	37.2768	Demersal	Globefish	Takifugu porphyreus	2012-09-03	6.67
Fukushima	16.4957	141.032	37.2768	Demersal	Gurnard	Chelidonichthys spinosus	2012-09-03	12.3
Fukushima	16.4957	141.032	37.2768	Demersal	Ocellate spot skate	Okamejei kenojei	2012-09-03	219
Fukushima	17.8103	141.042	37.5847	Demersal	Fat greenling	Hexagrammos otakii	2012-09-04	42
Fukushima	17.8103	141.042	37.5847	Demersal	Fat greenling	Hexagrammos otakii	2012-09-04	74
Fukushima	17.8103	141.042	37.5847	Demersal	Fat greenling	Hexagrammos otakii	2012-09-04	90
Fukushima	17.8103	141.042	37.5847	Demersal	Fat greenling	Hexagrammos otakii	2012-09-04	110
Fukushima	17.8103	141.042	37.5847	Demersal	Angel shark	Squatina sp.	2012-09-05	80
Fukushima	14.4504	141.062	37.5528	Demersal	Common skate	Raja kenojei	2012-09-05	110
Fukushima	17.8103	141.042	37.5847	Demersal	Common skate	Raja kenojei	2012-09-05	150
Fukushima	14.4504	141.062	37.5528	Demersal	Dory	Zenopsis nebulosa	2012-09-05	25
Fukushima	17.8103	141.042	37.5847	Demersal	Drumfish		2012-09-05	23
Fukushima	14.4504	141.062	37.5528	Demersal	Drumfish		2012-09-05	40
Fukushima	17.8103	141.042	37.5847	Demersal	Flatfish		2012-09-05	40
Fukushima	14.4504	141.062	37.5528	Demersal	Flatfish		2012-09-05	52
Fukushima	17.8103	141.042	37.5847	Demersal	Fat greenling	Hexagrammos otakii	2012-09-05	11
Fukushima	17.8103	141.042	37.5847	Demersal	Fat greenling	Hexagrammos otakii	2012-09-05	15
Fukushima	17.8103	141.042	37.5847	Demersal	Fat greenling	Hexagrammos otakii	2012-09-05	23
Fukushima	17.8103	141.042	37.5847	Demersal	Fat greenling	Hexagrammos otakii	2012-09-05	24
Fukushima	17.8103	141.042	37.5847	Demersal	Fat greenling	Hexagrammos otakii	2012-09-05	59
Fukushima	17.8103	141.042	37.5847	Demersal	Fat greenling	Hexagrammos otakii	2012-09-05	83
Fukushima	17.8103	141.042	37.5847	Demersal	Fat greenling	Hexagrammos otakii	2012-09-05	91
Fukushima	17.8103	141.042	37.5847	Demersal	Fat greenling	Hexagrammos otakii	2012-09-05	110
Fukushima	17.8103	141.042	37.5847	Demersal	Fat greenling	Hexagrammos otakii	2012-09-05	870
Fukushima	14.4504	141.062	37.5528	Demersal	Pitted stingray	Dasyatis matsubarai	2012-09-05	55
Fukushima	14.4504	141.062	37.5528	Demersal	Japanese black rockfish	Sebastes cheni	2012-09-05	330
Fukushima	17.8103	141.042	37.5847	Demersal	Pitted stingray	Dasyatis matsubarai	2012-09-05	91
Fukushima	10.3187	141.034	37.3322	Demersal	Fat greenling	Hexagrammos otakii	2012-09-09	101
Fukushima	10.3187	141.034	37.3322	Demersal	Japanese black rockfish	Sebastes cheni	2012-09-09	138
Fukushima	10.3187	141.034	37.3322	Demersal	Korean rockfish	Sebastes schlegelii	2012-09-09	69.6
Fukushima	10.3187	141.034	37.3322	Demersal	Goldeye rockfish	Sebastes thompsoni	2012-09-09	319
Fukushima	10.3187	141.034	37.3322	Demersal	Fox jacopever	Sebastes vulpes	2012-09-09	93.2
Fukushima	23.7828	141.025	37.2114	Demersal	Conger eel	Conger myriaster	2012-09-09	107
Fukushima	16.4957	141.032	37.2768	Demersal	Olive flounder	Paralichthys olivaceus	2012-09-10	52.8
Fukushima	10.7249	141.154	37.4078	Demersal	Redwing searobin	Lepidotrigla microptera	2012-09-10	9.1
Fukushima	13.1877	141.149	37.3483	Demersal	Redwing searobin	Lepidotrigla microptera	2012-09-10	12
Fukushima	13.1877	141.149	37.3483	Demersal	Shotted halibut	Eopsetta grigorjewi	2012-09-10	21
Fukushima	10.7249	141.154	37.4078	Demersal	Slime flounder	Microstomus achne	2012-09-10	52
Fukushima	13.1877	141.149	37.3483	Demersal	Stone flounder	Kareius bicoloratus	2012-09-10	68
Fukushima	16.4957	141.032	37.2768	Demersal	Flathead	Platycephalus sp.	2012-09-10	67
Fukushima	16.4957	141.032	37.2768	Demersal	Ocellate spot skate	Okamejei kenojei	2012-09-10	495
Fukushima	16.4957	141.032	37.2768	Demersal	Nibe croaker	Nibea mitsukurii	2012-09-10	61.6
Fukushima	16.4957	141.032	37.2768	Demersal	Fat greenling	Hexagrammos otakii	2012-09-10	226
Fukushima	10.7249	141.154	37.4078	Demersal	Common skate	Raja kenojei	2012-09-10	110
Fukushima	13.1877	141.149	37.3483	Demersal	Common skate	Raja kenojei	2012-09-10	180
Fukushima	13.1877	141.149	37.3483	Demersal	Crimson sea bream	Evynnis japonica	2012-09-10	7.1
Fukushima	10.7249	141.154	37.4078	Demersal	Dory	Zenopsis nebulosa	2012-09-10	8.9
Fukushima	13.1877	141.149	37.3483	Demersal	Dory	Zenopsis nebulosa	2012-09-10	19
Fukushima	10.7249	141.154	37.4078	Demersal	Flatfish		2012-09-10	6.1
Fukushima	13.1877	141.149	37.3483	Demersal	Flatfish		2012-09-10	54
Fukushima	10.7249	141.154	37.4078	Demersal	Marbled sole	Pseudopleuronectes yokohamae	2012-09-10	22
Fukushima	13.1877	141.149	37.3483	Demersal	Marbled sole	Pseudopleuronectes yokohamae	2012-09-10	64
Fukushima	17.8103	141.042	37.5847	Demersal	Fat greenling	Hexagrammos otakii	2012-09-11	25
Fukushima	17.8103	141.042	37.5847	Demersal	Fat greenling	Hexagrammos otakii	2012-09-11	38
Fukushima	17.8103	141.042	37.5847	Demersal	Fat greenling	Hexagrammos otakii	2012-09-11	36
Fukushima	17.8103	141.042	37.5847	Demersal	Fat greenling	Hexagrammos otakii	2012-09-11	55
Fukushima	17.8103	141.042	37.5847	Demersal	Fat greenling	Hexagrammos otakii	2012-09-11	60
Fukushima	17.8103	141.042	37.5847	Demersal	Fat greenling	Hexagrammos otakii	2012-09-11	60
Fukushima	17.8103	141.042	37.5847	Demersal	Fat greenling	Hexagrammos otakii	2012-09-11	62
Fukushima	17.8103	141.042	37.5847	Demersal	Fat greenling	Hexagrammos otakii	2012-09-11	72
Fukushima	17.8103	141.042	37.5847	Demersal	Fat greenling	Hexagrammos otakii	2012-09-11	67
Fukushima	17.8103	141.042	37.5847	Demersal	Fat greenling	Hexagrammos otakii	2012-09-11	100
Fukushima	23.977	141.041	37.6402	Demersal	Brown hakeling	Physiculus maximowiczi	2012-09-11	10.2
Fukushima	23.977	141.041	37.6402	Demersal	Pacific cod	Gadus macrocephalus	2012-09-11	9.32
Fukushima	15.1506	141.039	37.5609	Demersal	Sea raven	Hemitripterus villosus	2012-09-11	10.4
Fukushima	15.1506	141.039	37.5609	Demersal	Pacific cod	Gadus macrocephalus	2012-09-11	33.7
Fukushima	23.977	141.041	37.6402	Demersal	Fat greenling	Hexagrammos otakii	2012-09-12	46.4
Fukushima	23.977	141.041	37.6402	Demersal	Olive flounder	Paralichthys olivaceus	2012-09-12	46.8
Fukushima	23.977	141.041	37.6402	Demersal	Stone flounder	Kareius bicoloratus	2012-09-12	44.8
Fukushima	23.977	141.041	37.6402	Demersal	Slime flounder	Microstomus achne	2012-09-12	51.1
Fukushima	23.977	141.041	37.6402	Demersal	Marbled flounder	Pleuronectes yokohamae	2012-09-12	10.4
Fukushima	23.977	141.041	37.6402	Demersal	Ocellate spot skate	Okamejei kenojei	2012-09-12	70.6
Fukushima	23.977	141.041	37.6402	Demersal	John Dory	Zeus faber	2012-09-12	20.1
Fukushima	23.977	141.041	37.6402	Demersal	Japanese black rockfish	Sebastes cheni	2012-09-12	217
Fukushima	23.977	141.041	37.6402	Demersal	Fox jacopever	Sebastes vulpes	2012-09-12	80.2
Fukushima	23.977	141.041	37.6402	Demersal	Nibe croaker	Nibea mitsukurii	2012-09-12	27.4
Fukushima	17.8103	141.042	37.5847	Demersal	Fat greenling	Hexagrammos otakii	2012-09-12	14
Fukushima	17.8103	141.042	37.5847	Demersal	Fat greenling	Hexagrammos otakii	2012-09-12	27
Fukushima	17.8103	141.042	37.5847	Demersal	Fat greenling	Hexagrammos otakii	2012-09-12	24
Fukushima	17.8103	141.042	37.5847	Demersal	Fat greenling	Hexagrammos otakii	2012-09-12	40
Fukushima	17.8103	141.042	37.5847	Demersal	Fat greenling	Hexagrammos otakii	2012-09-12	69
Fukushima	23.7828	141.025	37.2114	Demersal	Conger eel	Conger myriaster	2012-09-14	25
Fukushima	23.7828	141.025	37.2114	Demersal	Brown hakeling	Physiculus maximowiczi	2012-09-14	22.3
Fukushima	23.7828	141.025	37.2114	Demersal	Nibe croaker	Nibea mitsukurii	2012-09-14	31.8
Fukushima	10.3187	141.034	37.3322	Demersal	Starspotted smooth-hound	Mustelus manazo	2012-09-14	51.8
Fukushima	10.3187	141.034	37.3322	Demersal	Stone flounder	Kareius bicoloratus	2012-09-14	71.3
Fukushima	10.3187	141.034	37.3322	Demersal	Slime flounder	Microstomus achne	2012-09-14	25.1
Fukushima	10.3187	141.034	37.3322	Demersal	Marbled flounder	Pleuronectes yokohamae	2012-09-14	27.8
Fukushima	10.3187	141.034	37.3322	Demersal	Crimson sea bream	Evynnis japonica	2012-09-14	23.7
Fukushima	10.3187	141.034	37.3322	Demersal	Red seabream	Pagrus major	2012-09-14	22.7
Fukushima	10.3187	141.034	37.3322	Demersal	Gurnard	Chelidonichthys spinosus	2012-09-14	27.9
Fukushima	10.3187	141.034	37.3322	Demersal	Ocellate spot skate	Okamejei kenojei	2012-09-14	103
Fukushima	10.3187	141.034	37.3322	Demersal	Vermiculated puffer	Takifugu snyderi	2012-09-14	24.3
Fukushima	10.3187	141.034	37.3322	Demersal	Flounder	Pleuronichthys japonicus	2012-09-14	13.5
Fukushima	10.3187	141.034	37.3322	Demersal	Sea dragonet	Repomucenus ornatipinnis	2012-09-14	7.54
Fukushima	17.807	141.039	37.265	Demersal	Angel shark	Squatina sp.	2012-09-15	92
Fukushima	12.7154	141.047	37.3111	Demersal	Banded dogfish	Chiloscyllium griseum	2012-09-15	870
Fukushima	17.807	141.039	37.265	Demersal	Common skate	Raja kenojei	2012-09-15	430
Fukushima	12.7154	141.047	37.3111	Demersal	Common skate	Raja kenojei	2012-09-15	420
Fukushima	17.807	141.039	37.265	Demersal	Drumfish		2012-09-15	37
Fukushima	12.7154	141.047	37.3111	Demersal	Drumfish		2012-09-15	38
Fukushima	17.807	141.039	37.265	Demersal	Flatfish		2012-09-15	66
Fukushima	12.7154	141.047	37.3111	Demersal	Flatfish		2012-09-15	140
Fukushima	17.807	141.039	37.265	Demersal	Flathead	Platycephalus sp.	2012-09-15	88
Fukushima	17.807	141.039	37.265	Demersal	Pitted stingray	Dasyatis matsubarai	2012-09-15	120
Fukushima	5.39219	141.079	37.4583	Demersal	Banded dogfish	Chiloscyllium griseum	2012-09-19	15
Fukushima	4.23837	141.083	37.4286	Demersal	Common skate	Raja kenojei	2012-09-19	200
Fukushima	5.39219	141.079	37.4583	Demersal	Common skate	Raja kenojei	2012-09-19	270
Fukushima	4.23837	141.083	37.4286	Demersal	Drumfish		2012-09-19	49
Fukushima	4.23837	141.083	37.4286	Demersal	Flatfish		2012-09-19	38
Fukushima	5.39219	141.079	37.4583	Demersal	Flatfish		2012-09-19	110
Fukushima	5.39219	141.079	37.4583	Demersal	Fat greenling	Hexagrammos otakii	2012-09-19	170
Fukushima	4.23837	141.083	37.4286	Demersal	Marbled sole	Pseudopleuronectes yokohamae	2012-09-19	54
Fukushima	5.39219	141.079	37.4583	Demersal	Marbled sole	Pseudopleuronectes yokohamae	2012-09-19	87
Fukushima	4.23837	141.083	37.4286	Demersal	Pitted stingray	Dasyatis matsubarai	2012-09-19	19
Fukushima	4.23837	141.083	37.4286	Demersal	Pitted stingray	Dasyatis matsubarai	2012-09-19	290
Fukushima	23.977	141.041	37.6402	Demersal	Sea raven	Hemitripterus villosus	2012-09-20	114
Fukushima	23.977	141.041	37.6402	Demersal	Littlemouth flounder	Pleuronectes herzensteini	2012-09-20	10.7
Fukushima	23.977	141.041	37.6402	Demersal	Pacific cod	Gadus macrocephalus	2012-09-20	15.8
Fukushima	23.7828	141.025	37.2114	Demersal	Starspotted smooth-hound	Mustelus manazo	2012-09-20	26.2
Fukushima	23.7828	141.025	37.2114	Demersal	Ocellate spot skate	Okamejei kenojei	2012-09-20	119
Fukushima	23.7828	141.025	37.2114	Demersal	Vermiculated puffer	Takifugu snyderi	2012-09-20	11.2
Fukushima	15.1506	141.039	37.5609	Demersal	Slime flounder	Microstomus achne	2012-09-20	21.7
Fukushima	15.1506	141.039	37.5609	Demersal	Sea raven	Hemitripterus villosus	2012-09-20	14
Fukushima	15.1506	141.039	37.5609	Demersal	Pacific cod	Gadus macrocephalus	2012-09-20	9.18
Fukushima	2.58026	141.044	37.4028	Demersal	Fat greenling	Hexagrammos otakii	2012-09-23	75.4
Fukushima	2.58026	141.044	37.4028	Demersal	Crimson sea bream	Evynnis japonica	2012-09-23	9.14
Fukushima	2.58026	141.044	37.4028	Demersal	Japanese black rockfish	Sebastes cheni	2012-09-23	92.9
Fukushima	2.58026	141.044	37.4028	Demersal	Goldeye rockfish	Sebastes thompsoni	2012-09-23	116
Fukushima	23.977	141.041	37.6402	Demersal	Fat greenling	Hexagrammos otakii	2012-09-26	53.3
Fukushima	23.977	141.041	37.6402	Demersal	Olive flounder	Paralichthys olivaceus	2012-09-26	77.7
Fukushima	23.977	141.041	37.6402	Demersal	Stone flounder	Kareius bicoloratus	2012-09-26	111
Fukushima	23.977	141.041	37.6402	Demersal	Slime flounder	Microstomus achne	2012-09-26	48
Fukushima	23.977	141.041	37.6402	Demersal	Marbled flounder	Pleuronectes yokohamae	2012-09-26	49.2
Fukushima	23.977	141.041	37.6402	Demersal	Silver Croaker	Argyrosomus argentatus	2012-09-26	11.9
Fukushima	23.977	141.041	37.6402	Demersal	Red seabream	Pagrus major	2012-09-26	18
Fukushima	23.977	141.041	37.6402	Demersal	Ocellate spot skate	Okamejei kenojei	2012-09-26	57.6
Fukushima	23.977	141.041	37.6402	Demersal	Nibe croaker	Nibea mitsukurii	2012-09-26	28.7
Fukushima	17.8103	141.042	37.5847	Demersal	Fat greenling	Hexagrammos otakii	2012-10-09	49
Fukushima	15.1506	141.039	37.5609	Demersal	Fat greenling	Hexagrammos otakii	2012-10-09	35.4
Fukushima	15.1506	141.039	37.5609	Demersal	Olive flounder	Paralichthys olivaceus	2012-10-09	57.4
Fukushima	15.1506	141.039	37.5609	Demersal	Conger eel	Conger myriaster	2012-10-09	17.4
Fukushima	15.1506	141.039	37.5609	Demersal	Stone flounder	Kareius bicoloratus	2012-10-09	94.1
Fukushima	15.1506	141.039	37.5609	Demersal	Marbled flounder	Pleuronectes yokohamae	2012-10-09	15.7
Fukushima	15.1506	141.039	37.5609	Demersal	Crimson sea bream	Evynnis japonica	2012-10-09	6.79
Fukushima	15.1506	141.039	37.5609	Demersal	Gurnard	Chelidonichthys spinosus	2012-10-09	32.3
Fukushima	15.1506	141.039	37.5609	Demersal	Ocellate spot skate	Okamejei kenojei	2012-10-09	90.4
Fukushima	15.1506	141.039	37.5609	Demersal	John Dory	Zeus faber	2012-10-09	10.5
Fukushima	2.58026	141.044	37.4028	Demersal	Brown hakeling	Physiculus maximowiczi	2012-10-09	27.6
Fukushima	2.58026	141.044	37.4028	Demersal	Monkfish	Lophius litulon	2012-10-09	10.8
Fukushima	10.3187	141.034	37.3322	Demersal	Pacific cod	Gadus macrocephalus	2012-10-09	26.7
Fukushima	17.8103	141.042	37.5847	Demersal	Fat greenling	Hexagrammos otakii	2012-10-10	15
Fukushima	17.8103	141.042	37.5847	Demersal	Fat greenling	Hexagrammos otakii	2012-10-10	35
Fukushima	17.8103	141.042	37.5847	Demersal	Fat greenling	Hexagrammos otakii	2012-10-10	37
Fukushima	17.8103	141.042	37.5847	Demersal	Fat greenling	Hexagrammos otakii	2012-10-10	70
Fukushima	23.977	141.041	37.6402	Demersal	Ridged-eye flounder	Pleuronichthys cornutus	2012-10-11	18.8
Fukushima	23.977	141.041	37.6402	Demersal	Gurnard	Chelidonichthys spinosus	2012-10-11	20.4
[truncated: 8,397 more rows]

## Sheet: Pelagic_fish_2_30km
SELECT	Dist. FDNPP, Km	>= 2 Km AND <= 30 Km		Habitat	= pelagic			Bq/Kg fresh				Fish species
[truncated: 553 more rows]

[truncated: 1 more sheets: Pelagic_fish_OffshoreBox]
