# Supplementary material for: A dual pathways transfer model to account for changes in the radioactive caesium level in demersal and pelagic fish after the Fukushima Daï-ichi nuclear power plant accident
Source: PLOS journal article supplement (doi:10.1371/journal.pone.0172442), 2017-03-01
Supplement: S7 (10.1371/journal.pone.0172442.s007) [file journal.pone.0172442.s007]

## S6 Fig

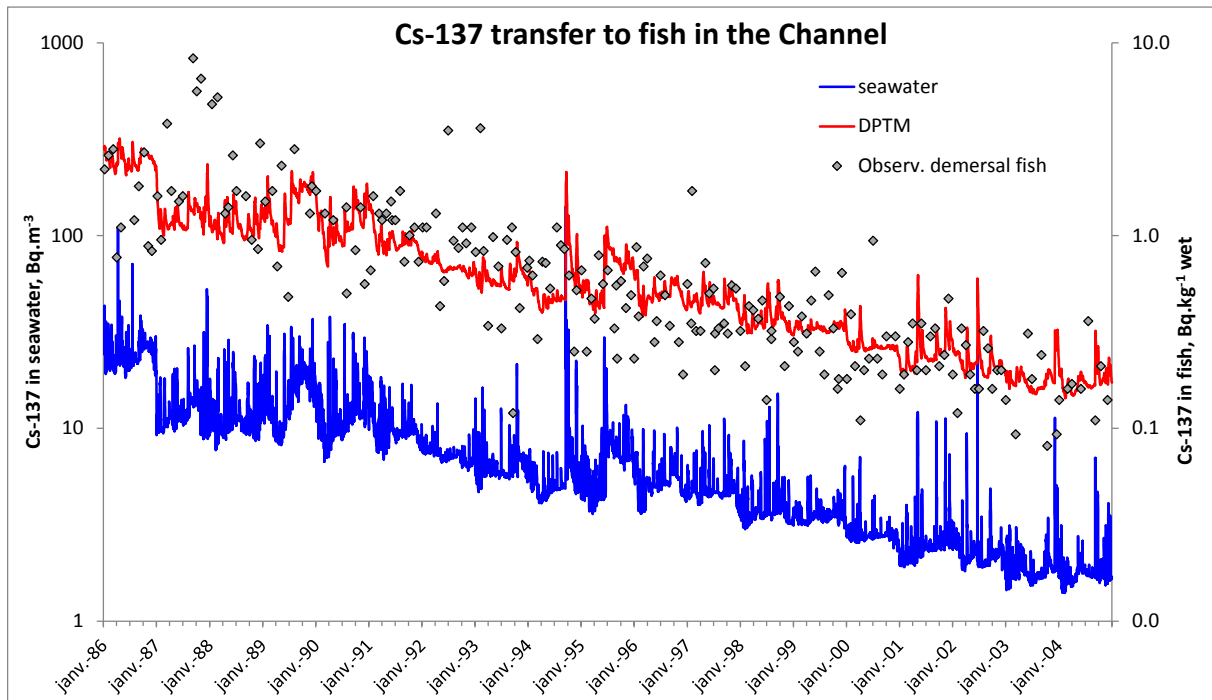

**S6 Fig. Trial application of the DPTM in the English Channel Sea.** Blue solid line: seawater signal computed 5 km North from the French Cotentin Peninsula with the hydrodynamic model (Bailly du Bois and Dumas, 2005) and used as the input for the DPTM. Grey filled diamonds: monthly individual demersal fish data (all species aggregated) caught in the near-field in the North of the Cotentin Peninsula. Red solid line: DPTM output computed with the same transfer parameters as for demersal fish in the near-field off Fukushima ( $CF_{\text{food}}$  and  $CF_{\text{f}}$  = 100;  $tb_{1/2}$  = 5 d;  $k_{\text{feed}}$  = 0.01 d<sup>-1</sup>;  $tb_{1/2\text{food}}$  = 240 d).
